# Supplementary material for: Palladium-catalyzed highly chemoselective dearomative spirocyclization of Ugi adducts: facile access to functionalized benzoazepinespiroindolenines with diastereoselectivity
Source: Royal Society of Chemistry journal article supplement (doi:10.1039/d3qo01262j), 2023-01-01

## Supporting Information

# **Palladium-Catalyzed Highly Chemoselective Dearomative Spirocyclization of Ugi Adducts: Facile Access to Functionalized Benzoazepinespiroindolenines with Diastereoselectivity**

Chuan-Hua Qu, Shu-Ting Li, Jian-Bo Liu, Dian-Yong Tang, Zhi-Gang Xu,\* Zhong-Zhu Chen,\*  
Gui-Ting Song \*

*College of Pharmacy, National & Local Joint Engineering Research center of Targeted and Innovative Therapeutics, Chongqing Key Laboratory of Kinase Modulators as Innovative Medicine, Chongqing University of Arts and Sciences, Chongqing 402160, China. E-mail: 18996193522@163.com.*

### Table of Contents

- 1. General Information**
- 2. Optimization of Reaction Conditions**
- 3. General Procedure for Synthesis of Benzoazepinespiroindolenines and Characterization Data of Compounds**
- 4. Investigation of Other Similar Substrates**
- 5. Solvent Effects of this Reaction**
- 6. Gram Scale-up Experiment**
- 7. Follow-up Experiment**
- 8. Biological experiments**
- 9. Mechanistic Studies and Computational Details of Mechanistic Studies**
- 10. Reference**
- 11. Copies <sup>1</sup>H NMR, <sup>13</sup>C NMR, <sup>19</sup>F NMR**

## 1. General Information

$^1\text{H}$  NMR,  $^{19}\text{F}$  NMR and  $^{13}\text{C}$  NMR spectra were measured on 400 MHz spectrometer, using  $\text{CDCl}_3$  as the solvent with tetramethylsilane (TMS) as the internal standard at room temperature. Chemical shifts ( $\delta$ ) are given in ppm relative to TMS, the coupling constants  $J$  are given in Hz. HRMS were obtained in the ESI mode. The products were purified by Biotage Isolera™ Spektra Systems and Petroleum Ether/EtOAc solvent systems. Unless otherwise noted, all reagents and solvents were obtained from commercial sources and used without further purification.

## 2. Optimization of Reaction Conditions

### Reaction Optimization 1

**Table S1:** Optimization of Reaction Conditions<sup>a</sup>

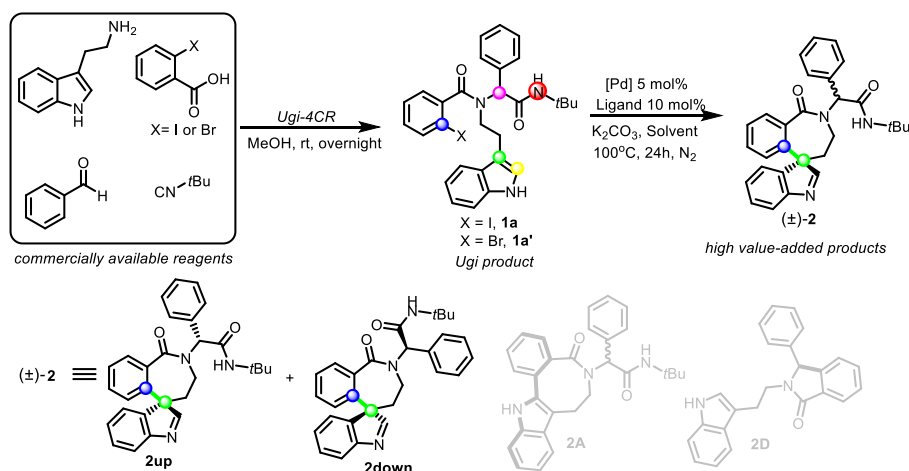

| entry                | [Pd]                 | Ligand           | Base                            | Solvent | Yield of (2down) <sup>b</sup> | Yield of (2up) <sup>b</sup> | Yield of (2A+2D) <sup>b</sup> |
|----------------------|----------------------|------------------|---------------------------------|---------|-------------------------------|-----------------------------|-------------------------------|
| 1                    | Pd(OAc) <sub>2</sub> | PPh <sub>3</sub> | K <sub>2</sub> CO <sub>3</sub>  | PhMe    | 56                            | 34                          | -                             |
| 2                    | Pd(OAc) <sub>2</sub> | PCy <sub>3</sub> | K <sub>2</sub> CO <sub>3</sub>  | PhMe    | 41                            | 16                          | -                             |
| 3                    | Pd(OAc) <sub>2</sub> | dppp             | K <sub>2</sub> CO <sub>3</sub>  | PhMe    | 20                            | <10                         | -                             |
| 4                    | Pd(OAc) <sub>2</sub> | Xantphos         | K <sub>2</sub> CO <sub>3</sub>  | PhMe    | 32                            | 35                          | -                             |
| 5                    | Pd(OAc) <sub>2</sub> | PPh <sub>3</sub> | Na <sub>2</sub> CO <sub>3</sub> | PhMe    | mess                          | 20                          | -                             |
| 6                    | Pd(OAc) <sub>2</sub> | PPh <sub>3</sub> | Cs <sub>2</sub> CO <sub>3</sub> | PhMe    | unstable                      | unstable                    | -                             |
| 7                    | Pd(OAc) <sub>2</sub> | PPh <sub>3</sub> | KOAc                            | PhMe    | trace                         | <10                         | -                             |
| 8                    | Pd(OAc) <sub>2</sub> | PPh <sub>3</sub> | K <sub>3</sub> PO <sub>4</sub>  | PhMe    | 36                            | 20                          | -                             |
| 9                    | Pd(OAc) <sub>2</sub> | PPh <sub>3</sub> | DABCO                           | PhMe    | 54                            | 18                          | -                             |
| 10 <sup>repeat</sup> | Pd(OAc) <sub>2</sub> | PPh <sub>3</sub> | Cs <sub>2</sub> CO <sub>3</sub> | PhMe    | unstable                      | unstable                    | -                             |
| 11                   | Pd(OAc) <sub>2</sub> | PPh <sub>3</sub> | NaOtBu                          | PhMe    | trace                         | trace                       | -                             |
| 12                   | Pd(OAc) <sub>2</sub> | PPh <sub>3</sub> | DMAP                            | PhMe    | trace                         | trace                       | -                             |
| 13                   | Pd(OAc) <sub>2</sub> | PPh <sub>3</sub> | DBU                             | PhMe    | trace                         | trace                       | -                             |
| 14                   | Pd(OAc) <sub>2</sub> | PPh <sub>3</sub> | K <sub>2</sub> CO <sub>3</sub>  | DMSO    | 0                             | 0                           | 2A+2D                         |
| 15                   | Pd(OAc) <sub>2</sub> | PPh <sub>3</sub> | K <sub>2</sub> CO <sub>3</sub>  | DMF     | 0                             | 0                           | 2A+2D                         |
| 16                   | Pd(OAc) <sub>2</sub> | PPh <sub>3</sub> | K <sub>2</sub> CO <sub>3</sub>  | Xylene  | 38                            | 25                          | -                             |
| 17                   | Pd(OAc) <sub>2</sub> | PPh <sub>3</sub> | K <sub>2</sub> CO <sub>3</sub>  | PhCl    | 44                            | 52                          | -                             |

|                 |                                                    |                  |                                |       |    |     |   |
|-----------------|----------------------------------------------------|------------------|--------------------------------|-------|----|-----|---|
| 18              | Pd(OAc) <sub>2</sub>                               | PPh <sub>3</sub> | K <sub>2</sub> CO <sub>3</sub> | o-DCB | 76 | 13  | - |
| 19              | Pd(OAc) <sub>2</sub>                               | PPh <sub>3</sub> | K <sub>2</sub> CO <sub>3</sub> | DCE   | 53 | 16  | - |
| 20              | Pd <sub>2</sub> (dba) <sub>2</sub>                 | PPh <sub>3</sub> | K <sub>2</sub> CO <sub>3</sub> | o-DCB | 69 | <10 | - |
| 21              | PdCl <sub>2</sub> (PPh <sub>3</sub> ) <sub>3</sub> | PPh <sub>3</sub> | K <sub>2</sub> CO <sub>3</sub> | o-DCB | 63 | <10 | - |
| 22              | PdCl <sub>2</sub> (dppf)                           | PPh <sub>3</sub> | K <sub>2</sub> CO <sub>3</sub> | o-DCB | 66 | 20  | - |
| 23              | Pd(PPh <sub>3</sub> ) <sub>4</sub>                 | PPh <sub>3</sub> | K <sub>2</sub> CO <sub>3</sub> | o-DCB | 72 | 15  | - |
| 24 <sup>c</sup> | Pd(OAc) <sub>2</sub>                               | PPh <sub>3</sub> | K <sub>2</sub> CO <sub>3</sub> | o-DCB | 78 | 11  | - |

<sup>a</sup>Reaction was performed on a 0.1 mmol scale using 5 mol% [Pd], 10 mol% ligand and 2.0 eq. of base in 1 mL solvent, 100 °C, 24 h, N<sub>2</sub>. <sup>b</sup>Yield are those of products isolated by column chromatography. <sup>c</sup> 120 °C oil bath was used for 16h.

## Reaction Optimization 2

Refinement of reaction conditions screening using TLC detection

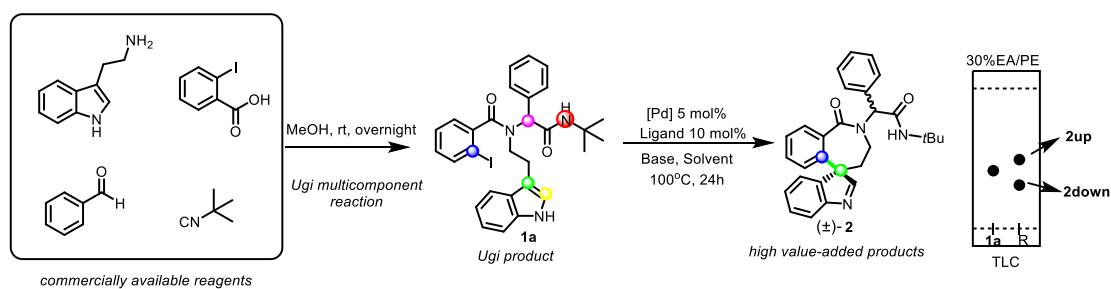

### TLC-1: Ligand screening

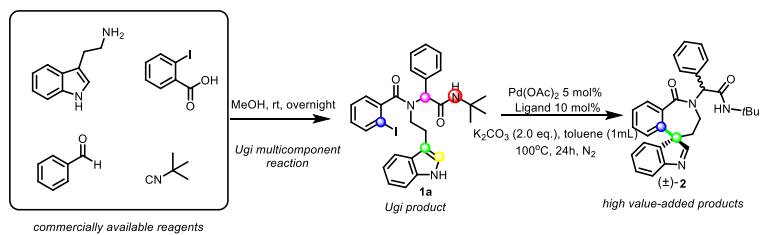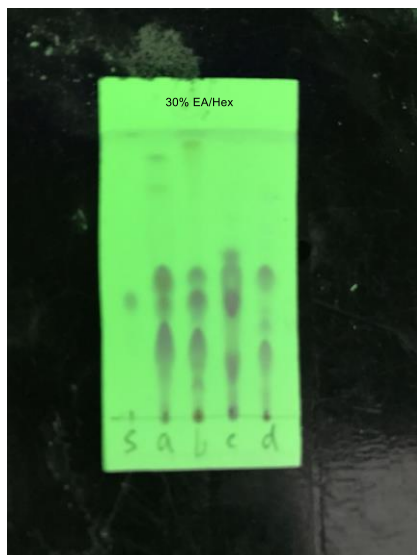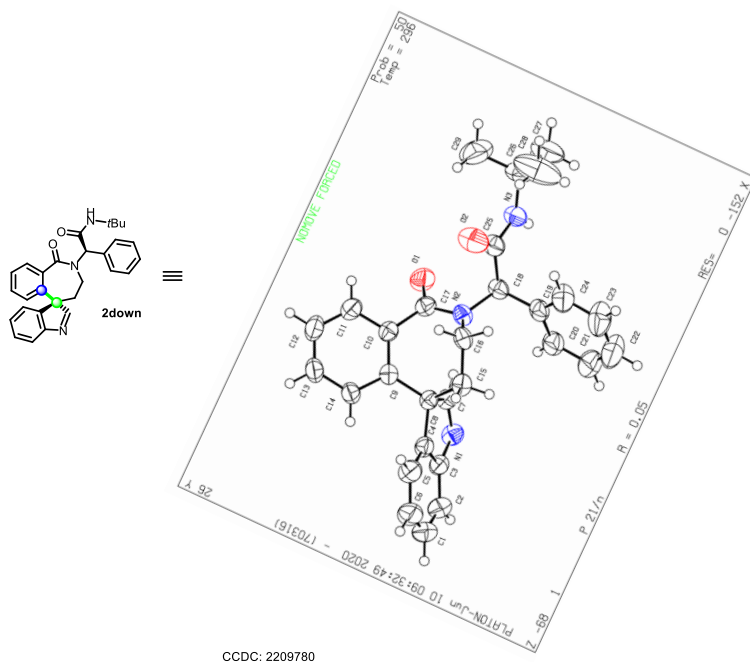

Bond precision: C-C = 0.0033 Å      Wavelength=0.71073

Cell:            a=14.2334(18)      b=10.4915(13)      c=17.043(2)  
                   alpha=90            beta=94.763(2)      gamma=90

Temperature:    296 K

|                | Calculated    | Reported      |
|----------------|---------------|---------------|
| Volume         | 2536.2(5)     | 2536.3(5)     |
| Space group    | P 21/n        | P 21/n        |
| Hall group     | -P 2yn        | -P 2yn        |
| Moiety formula | C29 H29 N3 O2 | ?             |
| Sum formula    | C29 H29 N3 O2 | C29 H29 N3 O2 |
| Mr             | 451.55        | 451.55        |
| Dx, g cm-3     | 1.183         | 1.183         |
| Z              | 4             | 4             |
| Mu (mm-1)      | 0.075         | 0.075         |
| F000           | 960.0         | 960.0         |
| F000'          | 960.37        |               |
| h, k, lmax     | 17, 12, 20    | 17, 12, 20    |
| Nref           | 4727          | 4715          |
| Tmin, Tmax     | 0.981, 0.982  |               |
| Tmin'          | 0.981         |               |

Correction method= Not given

Data completeness= 0.997      Theta(max)= 25.500

R(reflections)= 0.0530( 2910)      wR2(reflections)= 0.1504( 4715)

S = 0.906      Npar= 310

The following ALERTS were generated. Each ALERT has the format  
**test-name ALERT alert-type alert-level.**  
 Click on the hyperlinks for more details of the test.

| Alert level C                     |                                                    |              |
|-----------------------------------|----------------------------------------------------|--------------|
| <a href="#">PLAT970 ALERT 3 C</a> | NonSolvent Resd 1 C Ueq(max) / Ueq(min) Range      | 3.8 Ratio    |
| <a href="#">PLAT971 ALERT 3 C</a> | NonSolvent Resd 1 H Uiso(max)/Uiso(min) Range      | 4.3 Ratio    |
| <a href="#">PLAT972 ALERT 1 C</a> | Low 'MainMol' Ueq as Compared to Neighbors of      | CD6 Check    |
| <a href="#">PLAT973 ALERT 3 C</a> | Large K Value in the Analysis of Variance .....    | 6.841 Check  |
| <a href="#">PLAT974 ALERT 3 C</a> | Missing # of FCF Reflection(s) Below Theta(Min) .. | 6 Note       |
| <a href="#">PLAT975 ALERT 3 C</a> | Missing FCF Refl Between Tmin & STh/L= 0.600       | 5 Report     |
| Alert level G                     |                                                    |              |
| <a href="#">PLAT976 ALERT 5 G</a> | Number of Unrefined Donor-H Atoms .....            | 1 Report     |
| <a href="#">PLAT977 ALERT 4 G</a> | Model has Chirality at C8 (Centro SPGR)            | 3 Verify     |
| <a href="#">PLAT978 ALERT 4 G</a> | Model has Chirality at C18 (Centro SPGR)           | 3 Verify     |
| <a href="#">PLAT979 ALERT 1 G</a> | No Info/Value for _atom_sites_solution_primary ..  | Please Do !  |
| <a href="#">PLAT980 ALERT 4 G</a> | Missing # of FCF Reflections Above STh/L= 0.600    | 2 Note       |
| <a href="#">PLAT981 ALERT 4 G</a> | Number of OMIT Records in Embedded .res File ...   | 3 Note       |
| <a href="#">PLAT982 ALERT 3 G</a> | Average HKL Measurement Multiplicity .....         | 2.8 Low      |
| <a href="#">PLAT983 ALERT 5 G</a> | Dataset Contains no Negative Intensities .....     | Please Check |
| <a href="#">PLAT984 ALERT 5 G</a> | The SHELXL WEIGHT Optimisation has not Converged   | Please Check |
| <a href="#">PLAT985 ALERT 3 G</a> | Number C-C Bonds with Positive Residual Density.   | 1 Info       |
| <a href="#">PLAT986 ALERT 5 G</a> | Repd & Actual _reflns_number_gt Values Differ by   | 1 Check      |

0 ALERT level A = Most likely a serious problem - resolve or explain  
 0 ALERT level B = A potentially serious problem, consider carefully  
 6 ALERT level C = Check. Ensure it is not caused by an omission or oversight  
 11 ALERT level G = General information/check it is not something unexpected

1 ALERT type 1 CIF construction/syntax error, inconsistent or missing data  
 5 ALERT type 2 Indicator that the structure model may be wrong or deficient  
 5 ALERT type 3 Indicator that the structure quality may be low  
 3 ALERT type 4 Improvement, methodology, query or suggestion  
 3 ALERT type 5 Informative message, check

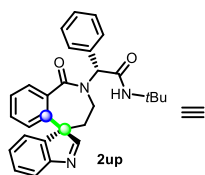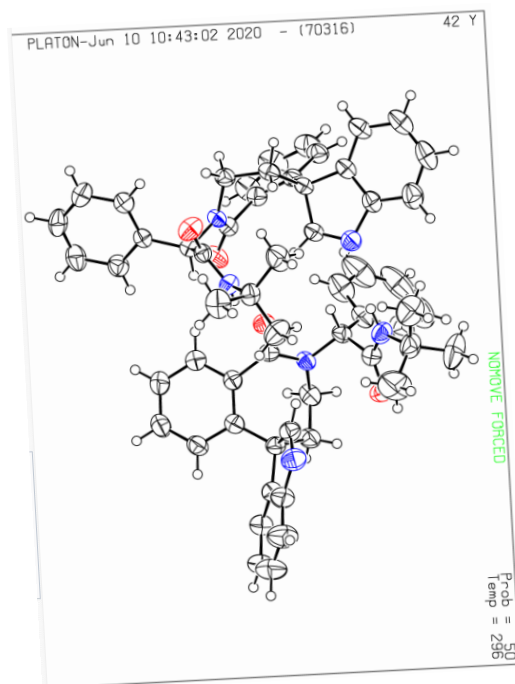

CCDC: 2209779

### Datablock: 1

Bond precision: C-C = 0.0033 Å      Wavelength=0.71073

Cell:            a=10.7591(10)      b=11.7873(11)      c=19.9651(19)  
                   alpha=93.982(2)      beta=95.015(2)      gamma=91.346(2)

Temperature:    296 K

|                | Calculated    | Reported      |
|----------------|---------------|---------------|
| Volume         | 2515.1(4)     | 2515.1(4)     |
| Space group    | P -1          | P -1          |
| Hall group     | -P 1          | -P 1          |
| Moiety formula | C29 H29 N3 O2 | ?             |
| Sum formula    | C29 H29 N3 O2 | C58 H58 N6 O4 |
| Mr             | 451.55        | 903.10        |
| Dx, g cm-3     | 1.192         | 1.193         |
| Z              | 4             | 2             |
| Mu (mm-1)      | 0.076         | 0.076         |
| F000           | 960.0         | 960.0         |
| F000'          | 960.37        |               |
| h, k, lmax     | 12, 14, 23    | 12, 14, 23    |
| Nref           | 8854          | 8795          |
| Tmin, Tmax     | 0.980, 0.983  |               |
| Tmin'          | 0.980         |               |

Correction method= Not given

Data completeness= 0.993      Theta(max)= 24.999

R(reflections)= 0.0494( 5596)      wR2(reflections)= 0.1182( 8795)

S = 0.968      Npar= 619

**Alert level C**

|                   |                                                |           |
|-------------------|------------------------------------------------|-----------|
| PLAT030_ALERT 2 C | Hirshfeld Test Diff for N5 --C46               | 5.1 s.u.  |
| PLAT042_ALERT 2 C | Low 'MainMol' Ueq as Compared to Neighbors of  | C25 Check |
| PLAT042_ALERT 2 C | Low 'MainMol' Ueq as Compared to Neighbors of  | C54 Check |
| PLAT480_ALERT 4 C | Long H...A H-Bond Reported H46 .N1             | 2.66 Ang. |
| PLAT480_ALERT 4 C | Long H...A H-Bond Reported H46 .N1             | 2.66 Ang. |
| PLAT601_ALERT 2 C | Structure Contains Solvent Accessible VOIDS of | 37 Ang**3 |

---

**Alert level G**

|                   |                                                  |              |
|-------------------|--------------------------------------------------|--------------|
| PLAT007_ALERT 5 G | Number of Unrefined Donor-H Atoms                | 2 Report     |
| PLAT045_ALERT 1 G | Calculated and Reported Z Differ by a Factor     | 2.00 Check   |
| PLAT154_ALERT 1 G | The s.u.'s on the Cell Angles are Equal ..(Note) | 0.002 Degree |
| PLAT700_ALERT 4 G | Number of Unusual/Non-Standard Labels            | 1 Note       |
| PLAT792_ALERT 4 G | Model has Chirality at C8 (Centro SPGR)          | R Verify     |
| PLAT792_ALERT 4 G | Model has Chirality at C17 (Centro SPGR)         | R Verify     |
| PLAT792_ALERT 4 G | Model has Chirality at C36 (Centro SPGR)         | R Verify     |
| PLAT792_ALERT 4 G | Model has Chirality at C46 (Centro SPGR)         | R Verify     |
| PLAT883_ALERT 1 G | No Info/Value for _atom_sites_solution_primary   | Please Do !  |
| PLAT933_ALERT 2 G | Number of OMIT Records in Embedded .res File     | 14 Note      |
| PLAT941_ALERT 3 G | Average HKL Measurement Multiplicity             | 1.5 Low      |

---

0 ALERT level A = Most likely a serious problem - resolve or explain  
0 ALERT level B = A potentially serious problem, consider carefully  
6 ALERT level C = Check. Ensure it is not caused by an omission or oversight  
11 ALERT level G = General information/check it is not something unexpected

3 ALERT type 1 CIF construction/syntax error, inconsistent or missing data  
5 ALERT type 2 Indicator that the structure model may be wrong or deficient  
1 ALERT type 3 Indicator that the structure quality may be low  
7 ALERT type 4 Improvement, methodology, query or suggestion  
1 ALERT type 5 Informative message, check

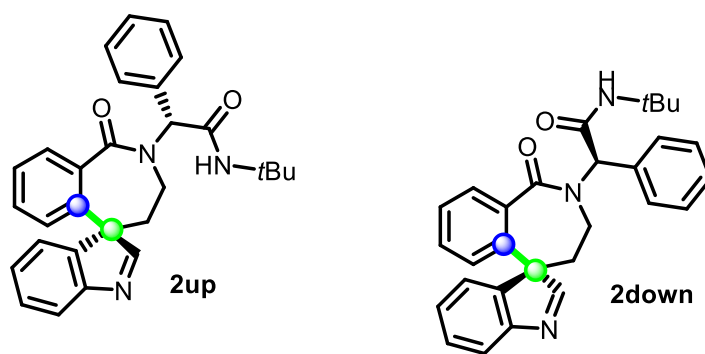

A pair of diastereomers of product 2

### TLC-2: Base screening

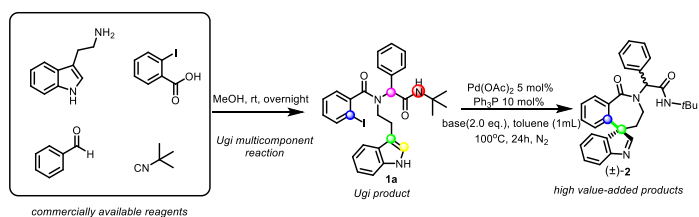

S580: **1a**, 1: Cs<sub>2</sub>CO<sub>3</sub>, 2: KOAc, 3: K<sub>3</sub>PO<sub>4</sub>, 4: DABCO, 5: Na<sub>2</sub>CO<sub>3</sub>, 6: tBuONa, 7: DMAP, 8: DBU

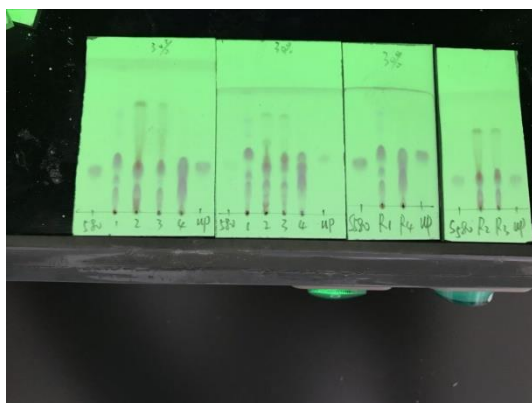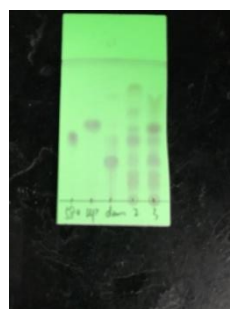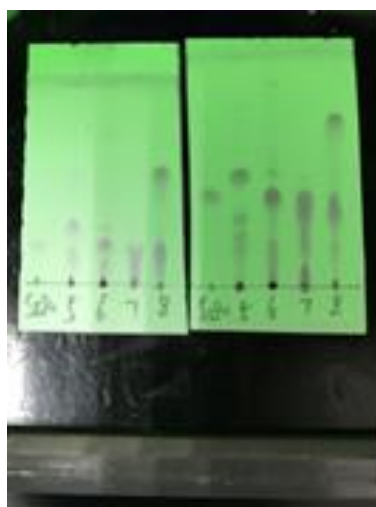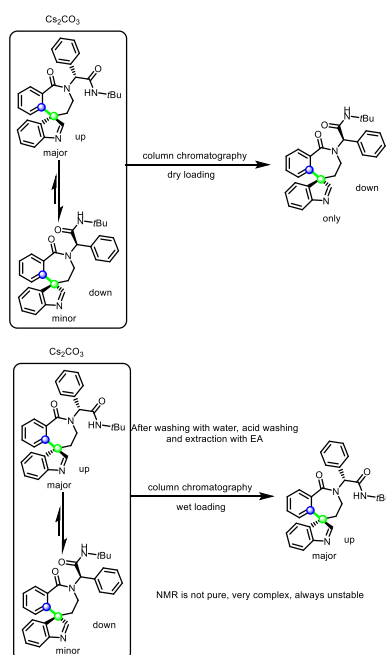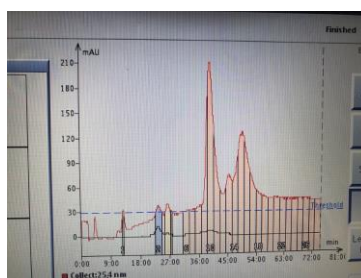

**TLC-3: Solvent screening (very important)**



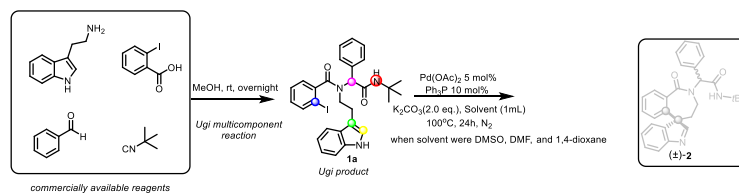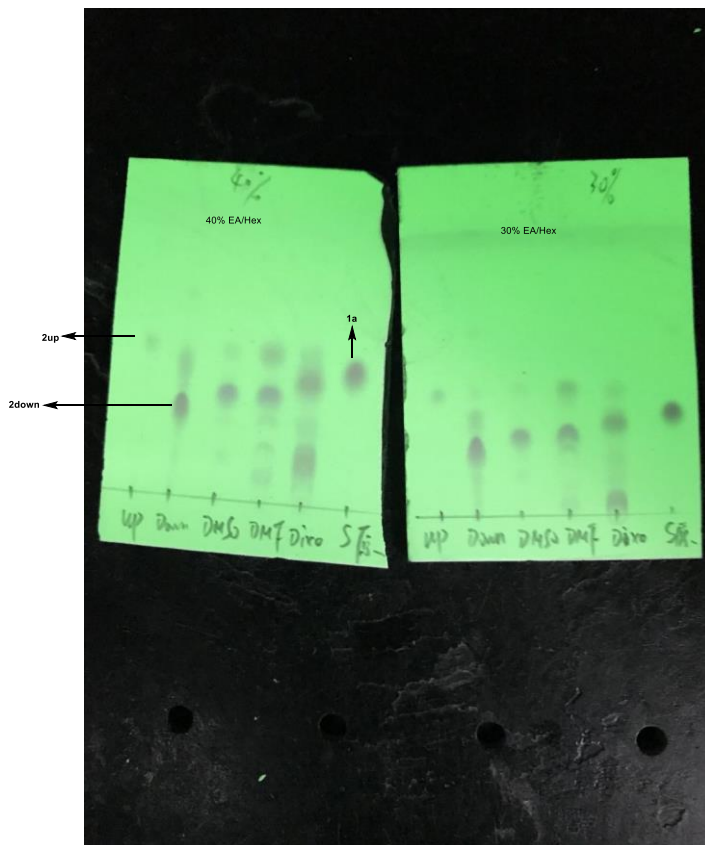

The starting materials **1a** were all reacted completely, but the reaction products of DMSO and DMF are not the same as the reaction product of 1,4-dioxane. We have separately carefully analyzed the case of the DMSO reaction solution, as shown below. The DMSO reaction solution is passed through the column with 30 -35% EA/Hex polarity to obtain two products, namely **2A** and **2D**. The structures of these two products were deduced by NMR analysis.

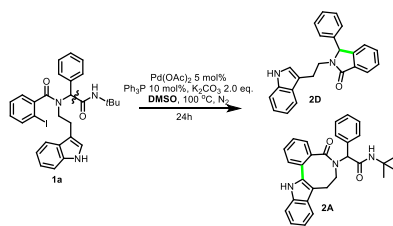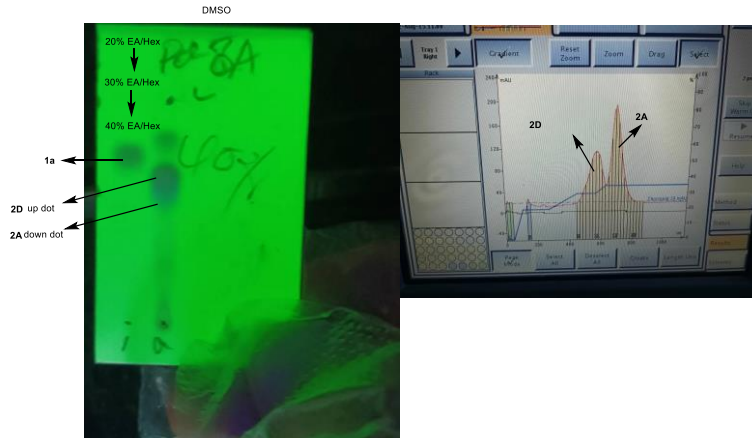

Accordingly, we judged that the 2-position of indole was involved in the reaction. This compound has an axial chiral center, so we can see the existence of obvious diastereomers in the  $^1\text{H-NMR}$ ,  $^{13}\text{C-NMR}$  and dept spectrum.

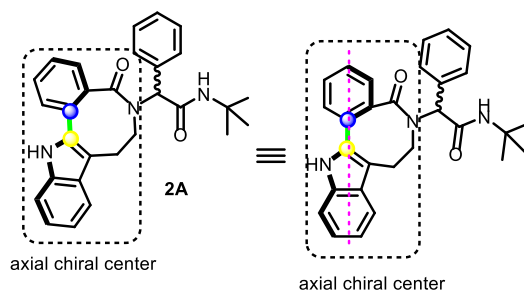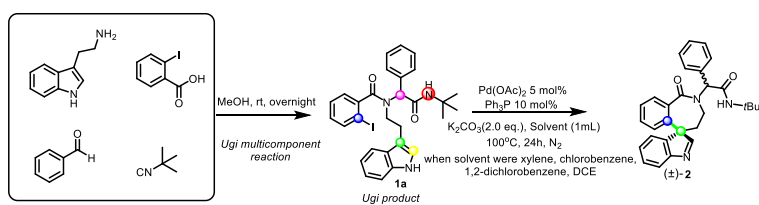

S580: 1a, 16: xylene, 17: chlorobenzene, 18: o-dichlorobenzene, 19: DCE  
 20:  $\text{Na}_2\text{CO}_3$ ,  $\text{Pd(OAc)}_2$ ,  $\text{Ph}_3\text{P}$ , toluene

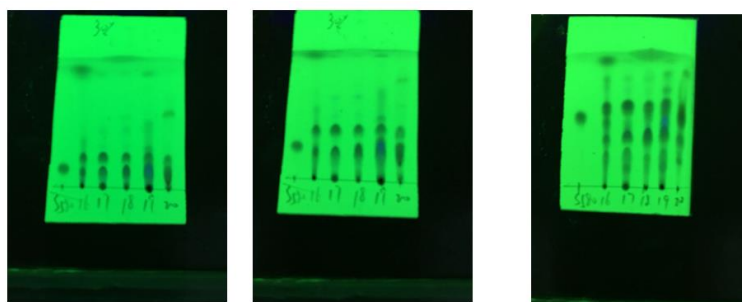

17: chlorobenzene

18: o-dichlorobenzene

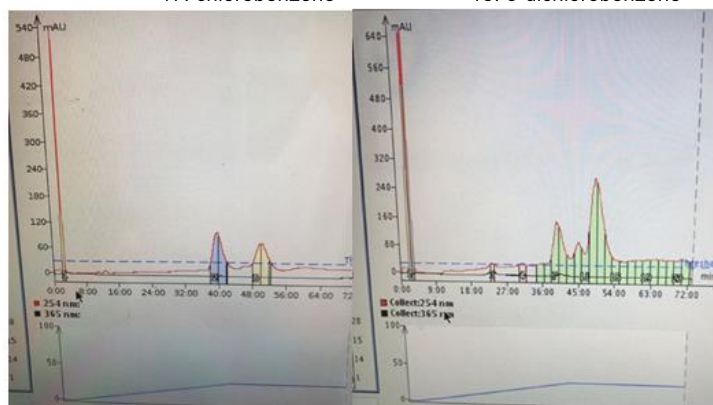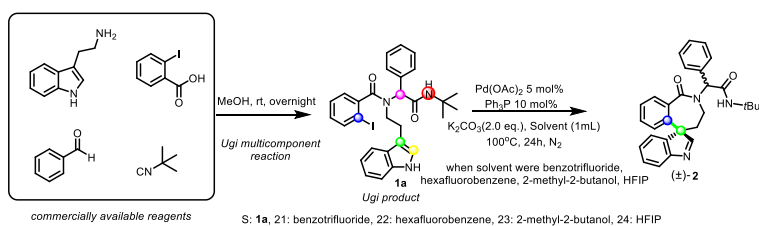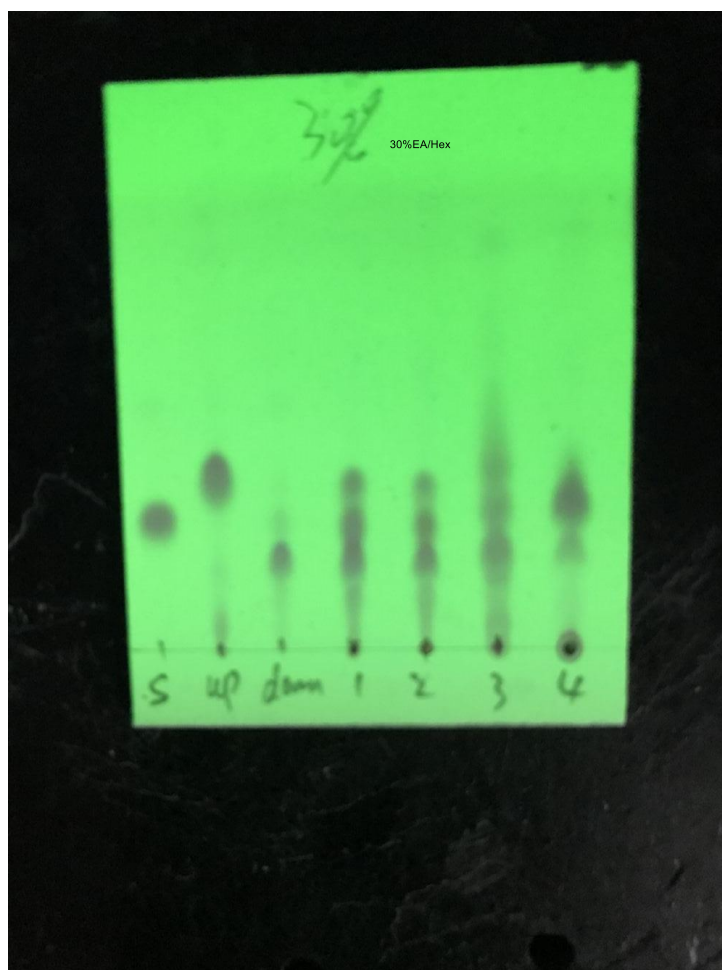

### 3. General Procedure for Synthesis of Benzoazepinespiroindolenines and Characterization Data of Compounds

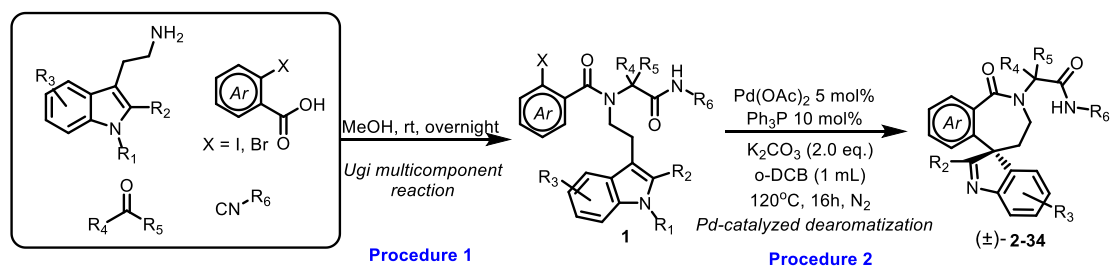

### Procedure 1: synthesis of Ugi products 1

To a solution of aldehydes or ketones (3 mmol, 1.0 equiv.) in methanol (10 mL) were added successively tryptamine derivatives (3 mmol, 1.0 equiv.), *o*-iodobenzoic acid or *o*-bromobenzoic acid derivatives (3 mmol, 1.0 equiv) and isonitrile (2.8 mmol, 0.93 equiv.) in a screw capped vial equipped with a magnetic stir bar. The reaction mixture was stirred at room temperature overnight. After completion of the reaction, the product would be precipitated in solid form, and the desired Ugi products **1** could be obtained directly by filtration.

### Procedure 2: synthesis of 3,4-dihydrospiro[benzo[*c*]azepine-5,3'-indol]-1(2H)-one derivatives

Ugi products **1** (0.1 mmol),  $Pd(OAc)_2$  (0.005 mmol, 1.1 mg, 0.05 eq),  $Ph_3P$  (0.01 mmol, 2.6 mg, 0.1 eq), and  $K_2CO_3$  (0.2 mmol, 28 mg, 2.0 eq) were added to a flame-dried Schlenk flask containing a stirring bar and purged by evacuating the flask and backfilling with  $N_2$  three times. Then, anhydrous *o*-DCB (1 ml) was added and the flask was sealed. The reaction mixture was stirred at  $120^\circ C$  for 16 h and monitored by TLC. Then the reaction mixture is subjected to wet loading and column chromatography to obtain the target product  $(\pm)$ -**2-34** over silica gel using EtOAc/ *n*-hexane = 30%~40% as eluent.

### Elaboration on the diastereomeric ratio of dearomatization products

The diastereomeric ratios of the dearomatization products were judged according to the crude  $^1H$  NMR of the reaction solution, which was based on the ratio of imine  $C(sp^2)$ -H. Overall most of the dearomatization products are mainly diastereoisomers at the down points. It should be noted here that most of the substituted aromatic acids or tryptophan-derived dearomatization products possess good diastereoselectivity and their TLC spot plates show almost a single diastereomer, which is beyond our separation ability, so we set their diastereomeric ratios to  $>15/1$ , and thus we isolated only one diastereoisomer. We did not perform crude  $^1H$  NMR to determine the diastereomeric ratio of this part of the product, e.g. **14**, **15**, **16**, **17**, **20**, **21**, **23**, **25**, **27**, **29**. For example, the reaction solution spot plate corresponding to product **15** is shown in the figure below.

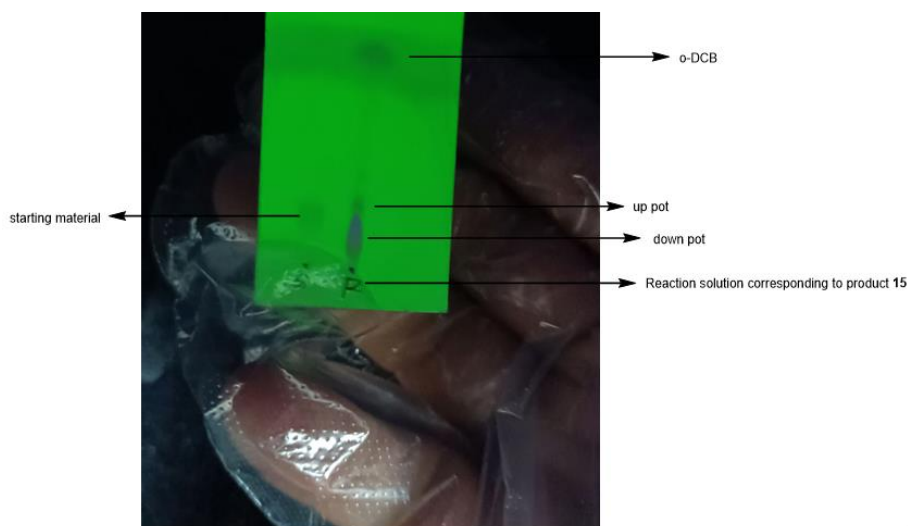

### 30% EA/hexane

In addition, we have isolated and identified all the product sites generated after the reaction to the extent possible. For example, the dearomatization products **10** and **11** were accompanied by the formation of  $C_{sp^3}\text{-H}$  aromatization by-products, and the reaction was extremely complex, and we did our best to isolate each product.

**The specific steps of the crude  $^1\text{H}$  NMR procedure are as follows:** Re-performing of each reaction involving the dearomatization products under standard conditions. After the reaction, the reaction solution was extracted with water and ethyl acetate to remove the residual palladium salt, then a small amount of the organic phase was concentrated under reduced pressure to remove the ethyl acetate (*o*-DCB boiling point  $179^\circ\text{C}$ , difficult to remove), and finally the residue was diluted by adding an excess of deuterated chloroform.

*N*-(*tert*-butyl)-2-(1-oxo-3,4-dihydrospiro[benzo[*c*]azepine-5,3'-indol]-2(1*H*)-yl)-2-phenylacetamide  
(±)-**2**

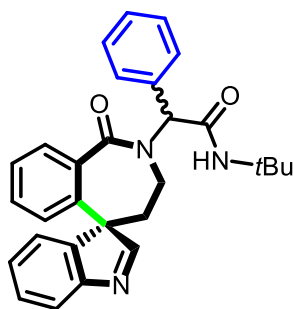

**2** crude  $^1\text{H}$  NMR

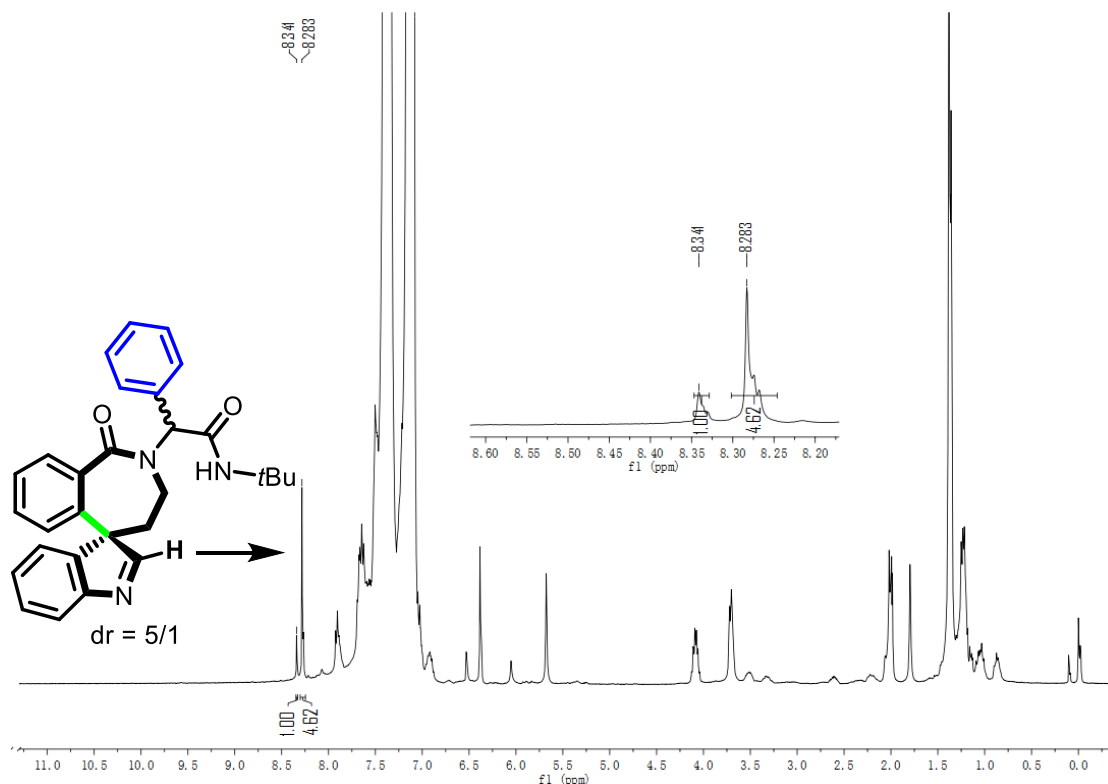

**dr = 2down/2up = 5/1**

White solid, **2down**, 35 mg, 78% yield, Rf = 0.25 (ethyl acetate/hexane = 30%);

**<sup>1</sup>H NMR** (400 MHz, CDCl<sub>3</sub>) δ 8.25 (s, 1H), 7.92 (d, *J* = 7.6 Hz, 1H), 7.65 (d, *J* = 7.4 Hz, 1H), 7.52 (d, *J* = 7.5 Hz, 2H), 7.46 (d, *J* = 7.2 Hz, 1H), 7.42 – 7.35 (m, 5H), 7.33 – 7.29 (m, 2H), 7.05 (d, *J* = 7.8 Hz, 1H), 6.34 (s, 1H), 5.63 (s, 1H), 3.72 – 3.69 (m, 2H), 2.10 – 2.05 (m, 1H), 1.40 (s, 9H), 1.09 – 1.01 (m, 1H) ppm;

**<sup>13</sup>C NMR** (100 MHz, CDCl<sub>3</sub>) δ 174.1, 171.5, 168.7, 154.5, 140.1, 136.7, 135.1, 131.5, 131.2, 131.1, 129.8, 129.3, 129.1, 128.6, 128.4, 126.4, 125.6, 125.0, 122.0, 64.5, 61.2, 52.0, 43.2, 40.8, 28.7 ppm;

**HRMS (ESI)** *m/z* calcd for C<sub>29</sub>H<sub>30</sub>N<sub>3</sub>O<sub>2</sub><sup>+</sup> (M+H)<sup>+</sup> 452.2333, found *m/z* 452.2337.

Yellow solid, **2up**, 5 mg, 11% yield, Rf = 0.5 (ethyl acetate/hexane = 30%);

**<sup>1</sup>H NMR** (400 MHz, CDCl<sub>3</sub>) δ 8.29 (s, 1H), 7.89 (d, *J* = 7.2 Hz, 1H), 7.70 (d, *J* = 6.3 Hz, 1H), 7.52 (d, *J* = 5.6 Hz, 1H), 7.40 – 7.31 (m, 9H), 7.12 (d, *J* = 7.5 Hz, 1H), 6.49 (s, 1H), 6.05 (s, 1H), 3.55 – 3.52 (m, 1H), 3.39 – 3.33 (m, 1H), 2.65 – 2.58 (m, 1H), 2.27 – 2.23 (m, 1H), 1.41 (s, 9H) ppm;

**<sup>13</sup>C NMR** (100 MHz, CDCl<sub>3</sub>) δ 174.7, 171.9, 167.9, 154.8, 140.3, 136.7, 135.6, 132.4, 131.5, 130.4, 129.0, 128.5 (t, *J* = 8.8 Hz), 126.3, 125.7, 125.0, 122.1, 64.6, 60.7, 52.1, 42.9, 40.1, 28.6 ppm;

**HRMS (ESI)** *m/z* calcd for C<sub>29</sub>H<sub>30</sub>N<sub>3</sub>O<sub>2</sub><sup>+</sup> (M+H)<sup>+</sup> 452.2333, found *m/z* 452.2335.

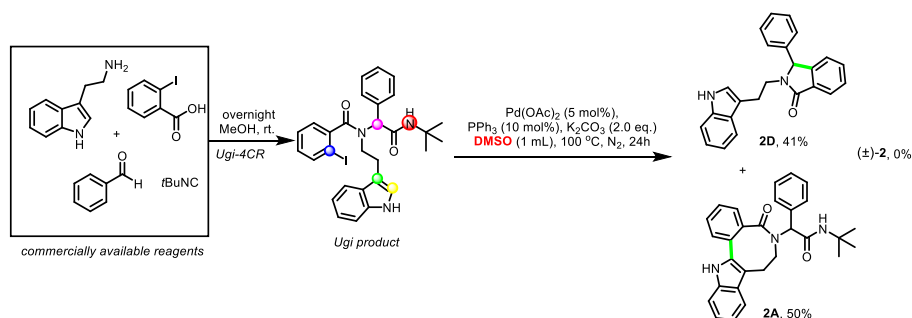

**2-(2-(1H-indol-3-yl)ethyl)-3-phenylisoindolin-1-one (2D)**

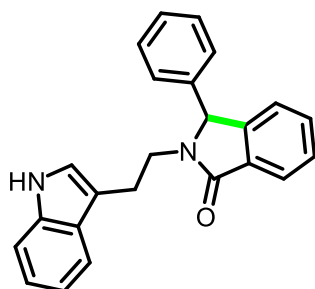

Colorless oil, **2D**, 14 mg, 41% yield, R<sub>f</sub> = 0.3 (ethyl acetate/hexane = 30%);

**<sup>1</sup>H NMR** (400 MHz, CDCl<sub>3</sub>) δ 8.09 (s, 1H), 7.90 (dd, *J* = 5.9, 2.6 Hz, 1H), 7.43 (p, *J* = 7.6 Hz, 3H), 7.37–7.28 (m, 4H), 7.17 (dd, *J* = 15.1, 7.5 Hz, 1H), 7.06 (t, *J* = 7.6 Hz, 2H), 7.03–6.95 (m, 3H), 5.21 (s, 1H), 4.51–4.04 (m, 1H), 3.31–3.19 (m, 1H), 3.18–3.05 (m, 1H), 3.04–2.89 (m, 1H) ppm;

**<sup>13</sup>C NMR** (100 MHz, CDCl<sub>3</sub>) δ 168.7, 146.4, 136.9, 136.3, 131.7, 131.6, 129.0, 128.6, 128.2, 127.7, 127.3, 123.4, 123.0, 122.1, 122.0, 119.4, 118.7, 112.9, 111.2, 65.0, 40.6, 24.2 ppm;

**HRMS (ESI)** *m/z* calcd for C<sub>24</sub>H<sub>21</sub>N<sub>2</sub>O<sup>+</sup> (M+H)<sup>+</sup> 353.1648, found *m/z* 353.1651.

***N*-(tert-butyl)-2-(5-oxo-5,7,8,13-tetrahydro-6H-benzo[6,7]azocino[5,4-b]indol-6-yl)-2-phenylacetamide (2A)**

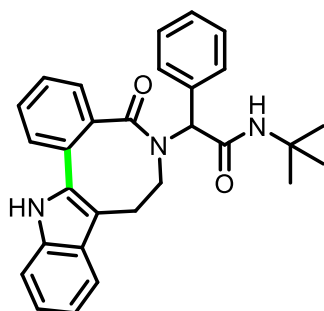

Colorless oil, **2A**, 23 mg, dr = 3/1, 50% yield, R<sub>f</sub> = 0.3 (ethyl acetate/hexane = 30%);

**<sup>1</sup>H NMR** (400 MHz, CDCl<sub>3</sub>) δ 8.48–8.32 (m, 1H), 7.58 (dd, *J* = 7.7, 5.9 Hz, 1H), 7.42 (ddd, *J* = 8.7, 6.8, 1.7 Hz, 3H), 7.38–7.32 (m, 5H), 7.32–7.25 (m, 1.8H), 7.25–7.14 (m, 1.3H), 7.07–7.05 (m, 1.52H), 6.23 (s, 0.25H), 5.84 (d, *J* = 13.2 Hz, 1H), 5.65 (s, 0.75H), 4.00 (tt, *J* = 18.0, 9.0 Hz, 1H), 3.84 (dd, *J* = 15.6, 5.4 Hz, 0.74H), 3.45–3.26 (m, 0.53H), 2.86–2.62 (m, 0.29H), 2.38 (dd, *J* = 16.6, 3.7 Hz, 0.76H), 2.23–1.99 (m, 0.93H), 1.24 (s, 6.71H), 0.91 (s, 2.47H) ppm;

**<sup>13</sup>C NMR** (100 MHz, CDCl<sub>3</sub>) δ 172.2, 172.0, 168.7, 168.5, 136.5, 136.3, 135.9, 135.6, 135.2, 134.8, 131.8, 131.6, 131.3, 131.0, 130.2, 130.0, 129.8, 129.5, 129.4, 129.1, 129.0, 128.9, 128.8, 128.7, 128.6, 128.5, 128.2, 123.1, 122.6, 119.9, 119.3, 118.8, 110.9, 110.8, 109.2, 108.8, 65.0, 62.3, 51.6, 51.1, 45.72, 44.9, 28.5, 27.9, 25.1, 24.5 ppm;

**HRMS (ESI)** *m/z* calcd for C<sub>29</sub>H<sub>30</sub>N<sub>3</sub>O<sub>2</sub><sup>+</sup> (M+H)<sup>+</sup> 452.2333, found *m/z* 452.2341.

***N*-(tert-butyl)-2-(1-oxo-3,4-dihydrospiro[benzo[*c*]azepine-5,3'-indol]-2(1H)-yl)-2-(*p*-tolyl)acetamide (±)-3**

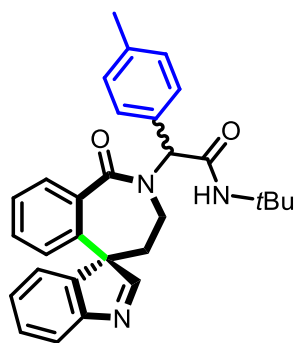

**3** crude  $^1\text{H}$  NMR

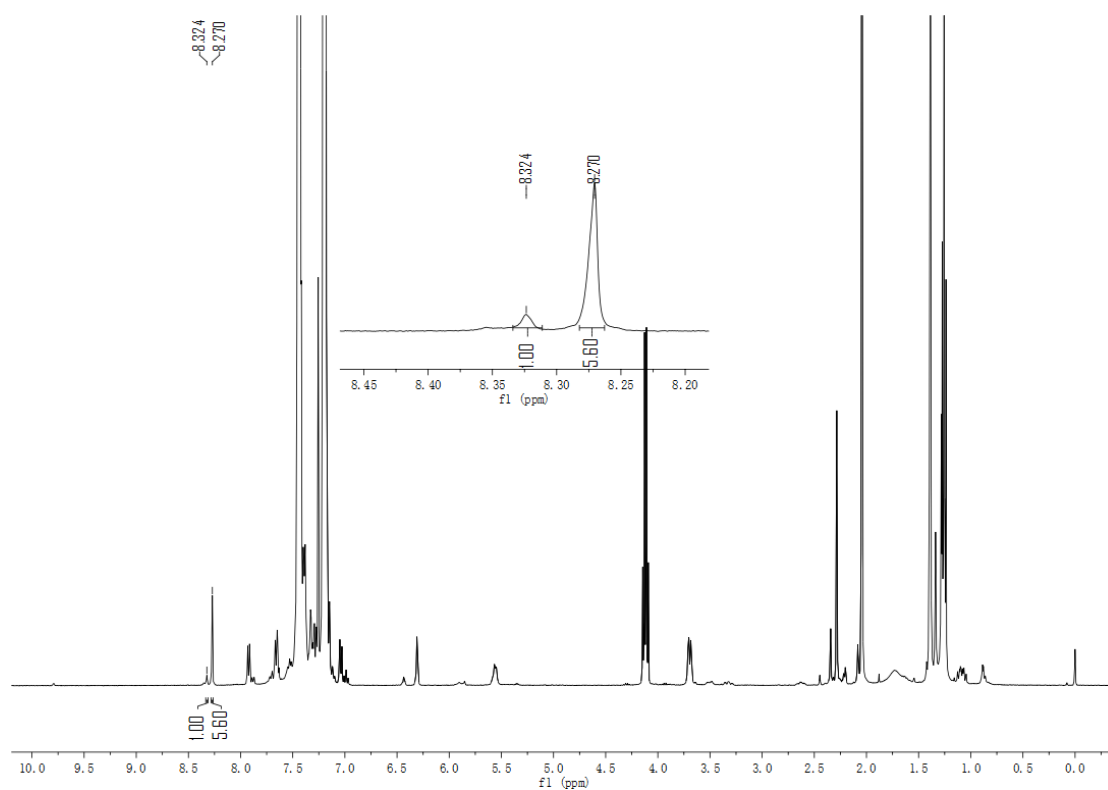

**dr = 3down/3up = 6/1**

White solid, **3down**, 33 mg, 70% yield,  $R_f = 0.25$  (ethyl acetate/hexane = 30%);

$^1\text{H}$  NMR (400 MHz,  $\text{CDCl}_3$ )  $\delta$  8.25 (s, 1H), 7.91 (d,  $J = 7.5$  Hz, 1H), 7.65 (d,  $J = 7.2$  Hz, 1H), 7.47 – 7.35 (m, 6H), 7.28 (d,  $J = 7.7$  Hz, 1H), 7.16 (d,  $J = 7.1$  Hz, 2H), 7.04 (d,  $J = 7.7$  Hz, 1H), 6.30 (s, 1H), 5.65 (s, 1H), 3.70 – 3.68 (m, 2H), 2.29 (s, 3H), 2.08 – 2.04 (m, 1H), 1.38 (s, 9H), 1.14 – 1.06 (m, 1H) ppm;

$^{13}\text{C}$  NMR (100 MHz,  $\text{CDCl}_3$ )  $\delta$  174.2, 171.4, 168.9, 154.5, 140.2, 139.0, 136.8, 132.0, 131.4, 131.3, 131.1, 129.9, 129.7, 128.5, 128.3, 126.4, 125.5, 125.1, 122.0, 64.6, 60.9, 51.9, 43.1, 40.8, 28.7, 21.1 ppm;

**HRMS (ESI)**  $m/z$  calcd for  $\text{C}_{30}\text{H}_{32}\text{N}_3\text{O}_2^+$  ( $\text{M}+\text{H}$ ) $^+$  466.2489, found  $m/z$  466.2493.

Yellow solid, **3up**, 6 mg, 12% yield,  $R_f = 0.5$  (ethyl acetate/hexane = 30%);

$^1\text{H}$  NMR (400 MHz,  $\text{CDCl}_3$ )  $\delta$  8.31 (s, 1H), 7.88 (d,  $J = 7.6$  Hz, 1H), 7.70 (d,  $J = 7.3$  Hz, 1H), 7.52 (d,  $J = 7.4$  Hz, 1H), 7.45 – 7.38 (m, 3H), 7.31 – 7.29 (m, 3H), 7.17 (d,  $J = 7.9$  Hz, 2H), 7.11 (d,  $J = 7.8$  Hz,



1H), 6.45 (s, 1H), 6.02 (s, 1H), 3.52 (dd,  $J = 14.6, 4.9$  Hz, 1H), 3.38 – 3.28 (m, 1H), 2.68 – 2.55 (m, 1H), 2.34 (s, 3H), 2.23 (dd,  $J = 14.2, 2.6$  Hz, 1H), 1.39 (s, 9H). ppm;

$^{13}\text{C}$  NMR (100 MHz,  $\text{CDCl}_3$ )  $\delta$  174.8, 171.8, 168.1, 154.8, 140.4, 138.3, 136.7, 132.4 (d,  $J = 10.9$  Hz), 131.4, 130.4, 129.7, 128.5 (d,  $J = 2.1$  Hz), 128.2, 126.3, 125.7, 125.0, 122.0, 64.6, 60.7, 52.0, 42.7, 40.1, 28.6, 21.1 ppm;

**HRMS (ESI)**  $m/z$  calcd for  $\text{C}_{30}\text{H}_{32}\text{N}_3\text{O}_2^+$  ( $\text{M}+\text{H}$ ) $^+$  466.2489, found  $m/z$  466.2497.

*N*-(*tert*-butyl)-2-(4-methoxyphenyl)-2-(1-oxo-3,4-dihydrospiro[benzo[*c*]azepine-5,3'-indol]-2(1*H*)-yl)acetamide ( $\pm$ )-**4**

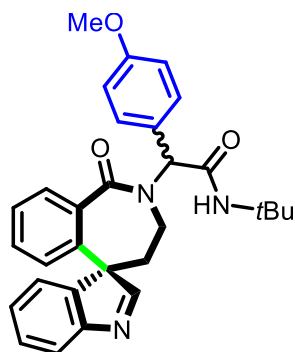

**4** crude  $^1\text{H}$  NMR

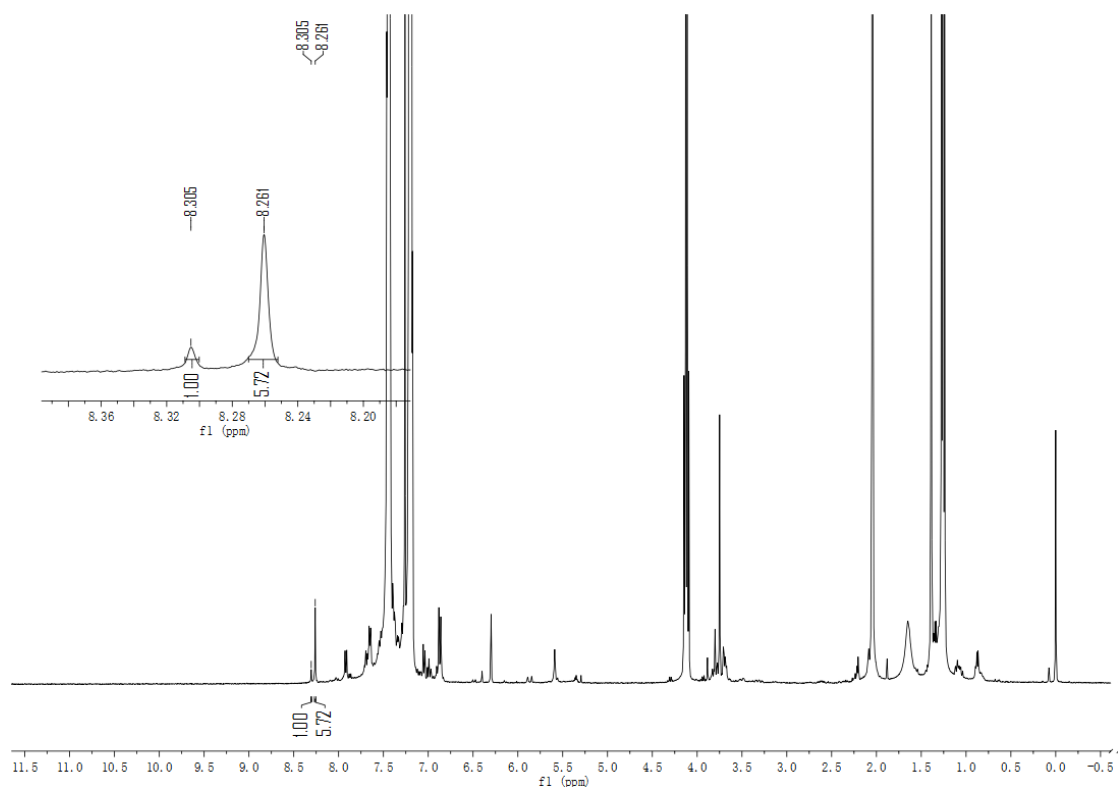

**dr = 4down/4up = 6/1**

Yellow solid, **4down**, 36 mg, 74% yield,  $R_f = 0.25$  (ethyl acetate/hexane = 40%);

$^1\text{H}$  NMR (400 MHz,  $\text{CDCl}_3$ )  $\delta$  8.25 (s, 1H), 7.92 (dd,  $J = 7.7, 1.3$  Hz, 1H), 7.67 – 7.63 (m), 7.46 – 7.37 (m, 7H), 7.29 (dd,  $J = 7.7, 1.5$  Hz, 1H), 7.08 – 7.02 (m, 1H), 6.88 (d,  $J = 8.7$  Hz, 2H), 6.29 (s, 1H), 5.59 (s, 1H), 3.76 (s, 3H), 3.69 (dd,  $J = 10.3, 4.6$  Hz), 2.09 – 2.05 (m, 1H), 1.39 (s, 9H), 1.12 – 1.04 (m, 1H)

ppm;

$^{13}\text{C}$  NMR (100 MHz,  $\text{CDCl}_3$ )  $\delta$  174.1, 171.4, 169.0, 159.9, 154.5, 140.1, 136.8, 131.4, 131.12 (t,  $J = 6.9$  Hz), 128.6, 128.4, 126.8, 126.4, 125.6, 125.1, 122.1, 114.5, 64.5, 60.5, 55.3, 51.9, 43.0, 40.9, 28.7 ppm;

**HRMS (ESI)**  $m/z$  calcd for  $\text{C}_{30}\text{H}_{32}\text{N}_3\text{O}_3^+$  ( $\text{M}+\text{H}$ ) $^+$  482.2438, found  $m/z$  482.2443.

Yellow solid, **4up**, 4 mg, 9% yield,  $R_f = 0.5$  (ethyl acetate/hexane = 40%);

$^1\text{H}$  NMR (400 MHz,  $\text{CDCl}_3$ )  $\delta$  8.31 (s, 1H), 7.88 (d,  $J = 7.6$  Hz, 1H), 7.70 (d,  $J = 7.6$  Hz, 1H), 7.52 (d,  $J = 6.8$  Hz, 1H), 7.41 (dd,  $J = 14.2, 7.0$  Hz, 3H), 7.33 (dd,  $J = 13.9, 8.2$  Hz, 3H), 7.11 (d,  $J = 7.8$  Hz, 1H), 6.89 (d,  $J = 8.6$  Hz, 2H), 6.42 (s, 1H), 6.15 (d,  $J = 14.1$  Hz, 1H), 3.80 (s, 3H), 3.54 (dd,  $J = 14.9, 4.1$  Hz, 1H), 3.38–3.27 (m, 1H), 2.60 (td,  $J = 13.3, 5.6$  Hz, 1H), 2.24 (dd,  $J = 17.9, 5.6$  Hz, 1H), 1.39 (s, 9H) ppm;

$^{13}\text{C}$  NMR (100 MHz,  $\text{CDCl}_3$ )  $\delta$  174.9, 171.8, 168.1, 159.6, 154.6, 140.3, 136.7, 132.3, 131.4, 130.4, 129.9, 128.6, 128.2, 127.4, 126.3, 125.7, 125.0, 122.0, 114.3, 64.5, 60.4, 55.3, 52.0, 42.6, 40.0, 28.6 ppm;

**HRMS (ESI)**  $m/z$  calcd for  $\text{C}_{30}\text{H}_{32}\text{N}_3\text{O}_3^+$  ( $\text{M}+\text{H}$ ) $^+$  482.2438, found  $m/z$  482.2446.

*N*-(*tert*-butyl)-2-(3-methoxyphenyl)-2-(1-oxo-3,4-dihydrospiro[benzo[*c*]azepine-5,3'-indol]-2(1*H*)-yl)acetamide ( $\pm$ )-**5**

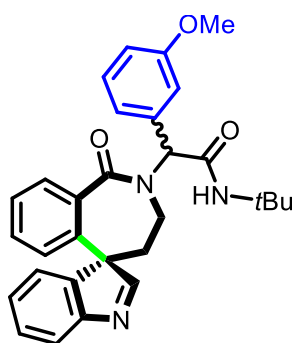

**5** crude  $^1\text{H}$  NMR

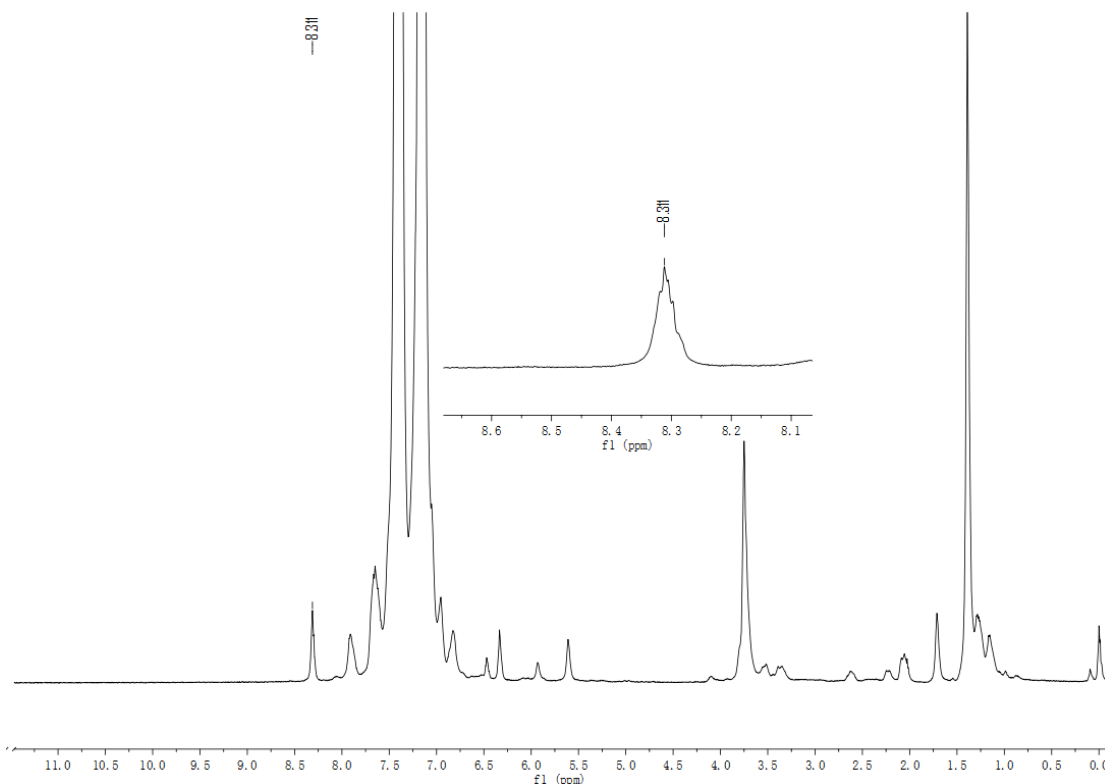

**dr = 5down/5up > 15/1**

Yellow solid, **5down**, 38 mg, 78% yield, R<sub>f</sub> = 0.25 (ethyl acetate/hexane = 40%);

**<sup>1</sup>H NMR** (400 MHz, CDCl<sub>3</sub>) δ 8.29 (s, 1H), 7.92 (d, *J* = 7.4 Hz, 1H), 7.65 (d, *J* = 7.2 Hz, 1H), 7.47 (d, *J* = 6.6 Hz, 1H), 7.42 – 7.35 (m, 3H), 7.30 – 7.25 (m, 2H), 7.10 – 7.04 (m, 3H), 6.84 (d, *J* = 8.2 Hz, 1H), 6.32 (s, 1H), 5.65 (s, 1H), 3.77 (s, 3H), 3.77 – 3.64 (m, 2H), 2.11 – 2.07 (m, 1H), 1.40 (s, 9H), 1.19 – 1.11 (m, 1H) ppm;

**<sup>13</sup>C NMR** (100 MHz, CDCl<sub>3</sub>) δ 174.2, 171.5, 168.6, 160.0, 154.6, 140.1, 136.7, 136.5, 131.5, 131.3, 131.1, 130.2, 128.6, 128.3, 126.4, 125.6, 125.1, 122.1, 115.1, 114.8, 64.5, 61.1, 55.3, 52.0, 43.2, 40.8, 28.7 ppm;

**HRMS (ESI)** *m/z* calcd for C<sub>30</sub>H<sub>32</sub>N<sub>3</sub>O<sub>3</sub><sup>+</sup> (M+H)<sup>+</sup> 482.2438, found *m/z* 482.2448.

**5up** is trace and not separated

*N*-(*tert*-butyl)-2-(1-oxo-3,4-dihydrospiro[benzo[*c*]azepine-5,3'-indol]-2(1*H*)-yl)-2-(*m*-tolyl)acetamide (±)-**6**

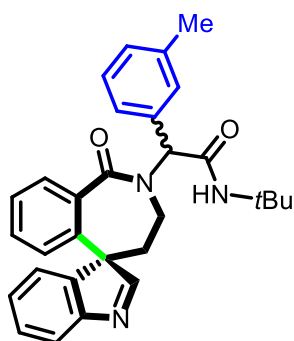

**6** crude  $^1\text{H}$  NMR

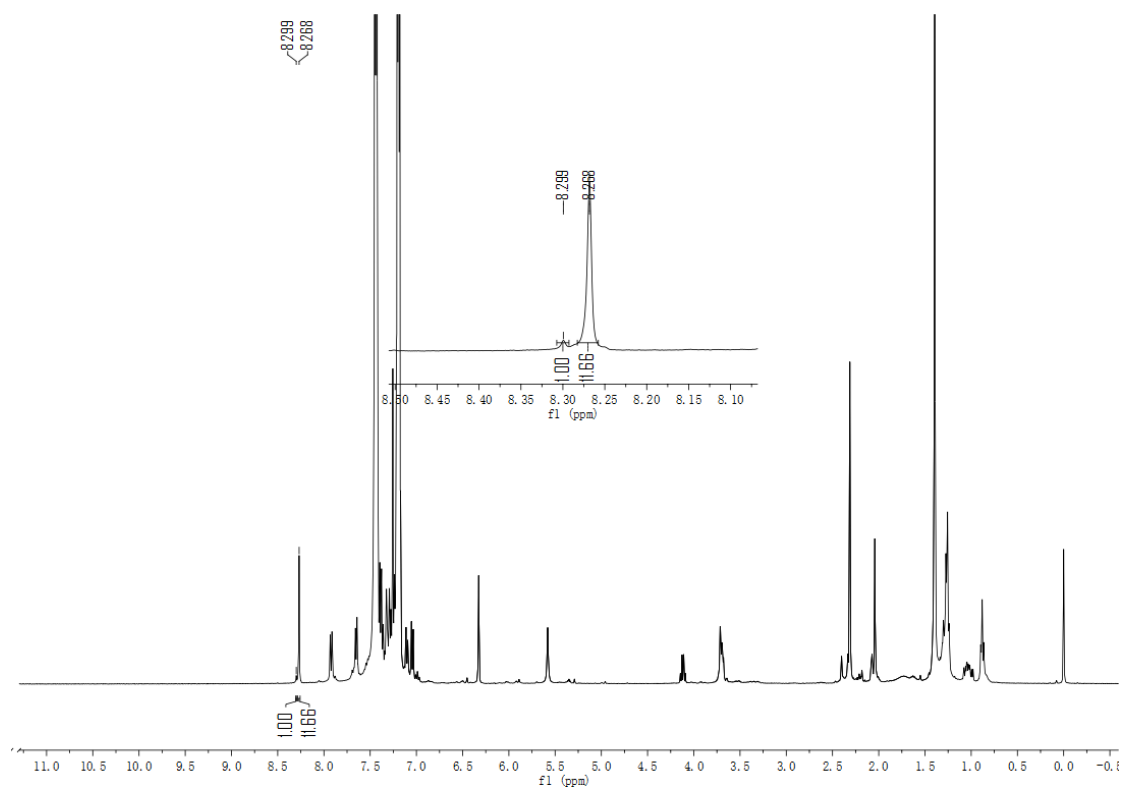

**dr = 6down/6up = 12/1**

White solid, **6down**, 37 mg, 79% yield,  $R_f = 0.25$  (ethyl acetate/hexane = 30%);

$^1\text{H}$  NMR (400 MHz,  $\text{CDCl}_3$ )  $\delta$  8.27 (s, 1H), 7.91 (d,  $J = 7.6$  Hz, 1H), 7.65 (d,  $J = 7.1$  Hz, 1H), 7.46 (d,  $J = 7.1$  Hz, 1H), 7.41–7.34 (m, 3H), 7.32–7.27 (m, 3H), 7.26–7.22 (m, 1H), 7.10 (d,  $J = 7.5$  Hz, 1H), 7.04 (d,  $J = 7.8$  Hz, 1H), 6.34 (s, 1H), 5.72 (s, 1H), 3.76–3.62 (m, 2H), 2.31 (s, 3H), 2.07–2.03 (m, 1H), 1.08–0.99 (m, 1H) ppm;

$^{13}\text{C}$  NMR (100 MHz,  $\text{CDCl}_3$ )  $\delta$  174.2, 171.4, 168.8, 154.5, 140.1, 139.1, 136.8, 135.1, 131.4, 131.2, 131, 130.5, 129.7, 129.1, 128.6, 128.3, 126.8, 126.4, 125.5, 125.1, 122.0, 64.5, 61.1, 51.9, 43.2, 40.9, 28.7, 21.4 ppm;

**HRMS (ESI)**  $m/z$  calcd for  $\text{C}_{30}\text{H}_{32}\text{N}_3\text{O}_2^+$  ( $\text{M}+\text{H}$ ) $^+$  466.2489, found  $m/z$  466.2493.

White solid, **6up**, 3 mg, 6% yield,  $R_f = 0.5$  (ethyl acetate/hexane = 30%);

$^1\text{H}$  NMR (400 MHz,  $\text{CDCl}_3$ )  $\delta$  8.30 (s, 1H), 7.89 (d,  $J = 7.6$  Hz, 1H), 7.70 (d,  $J = 7.4$  Hz, 1H), 7.52 (d,  $J = 6.8$  Hz, 1H), 7.45–7.38 (m, 3H), 7.30 (t,  $J = 7.7$  Hz, 1H), 7.26–7.22 (m, 1H), 7.20 (s, 2H), 7.13 (t,  $J = 8.0$  Hz, 2H), 6.46 (s, 1H), 6.06 (s, 1H), 3.54 (dd,  $J = 14.9, 4.1$  Hz, 1H), 3.41–3.30 (m, 1H), 2.62 (td,  $J = 13.4, 5.6$  Hz, 1H), 2.33 (s, 3H), 2.23 (dd,  $J = 14.5, 2.4$  Hz, 1H), 1.40 (s, 9H) ppm;

$^{13}\text{C}$  NMR (100 MHz,  $\text{CDCl}_3$ )  $\delta$  174.8, 171.8, 168.0, 154.8, 140.4, 138.7, 136.7, 135.5, 132.4, 131.4, 130.4, 129.2 (d,  $J = 5.6$  Hz), 128.8, 128.6, 128.2, 126.3, 125.7, 125.5, 125.0, 122.0, 64.6, 60.8, 52.1, 42.9, 40.0, 28.6, 21.5 ppm;

**HRMS (ESI)**  $m/z$  calcd for  $\text{C}_{30}\text{H}_{32}\text{N}_3\text{O}_2^+$  ( $\text{M}+\text{H}$ ) $^+$  466.2489, found  $m/z$  466.2497.

*N*-(*tert*-butyl)-2-(1-oxo-3,4-dihydrospiro[benzo[*c*]azepine-5,3'-indol]-2(1*H*)-yl)-2-(3,4,5-trimethoxyphenyl)acetamide ( $\pm$ )-**7**

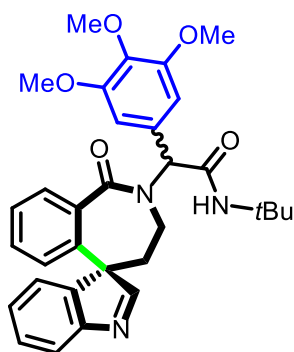

7 crude  $^1\text{H}$  NMR

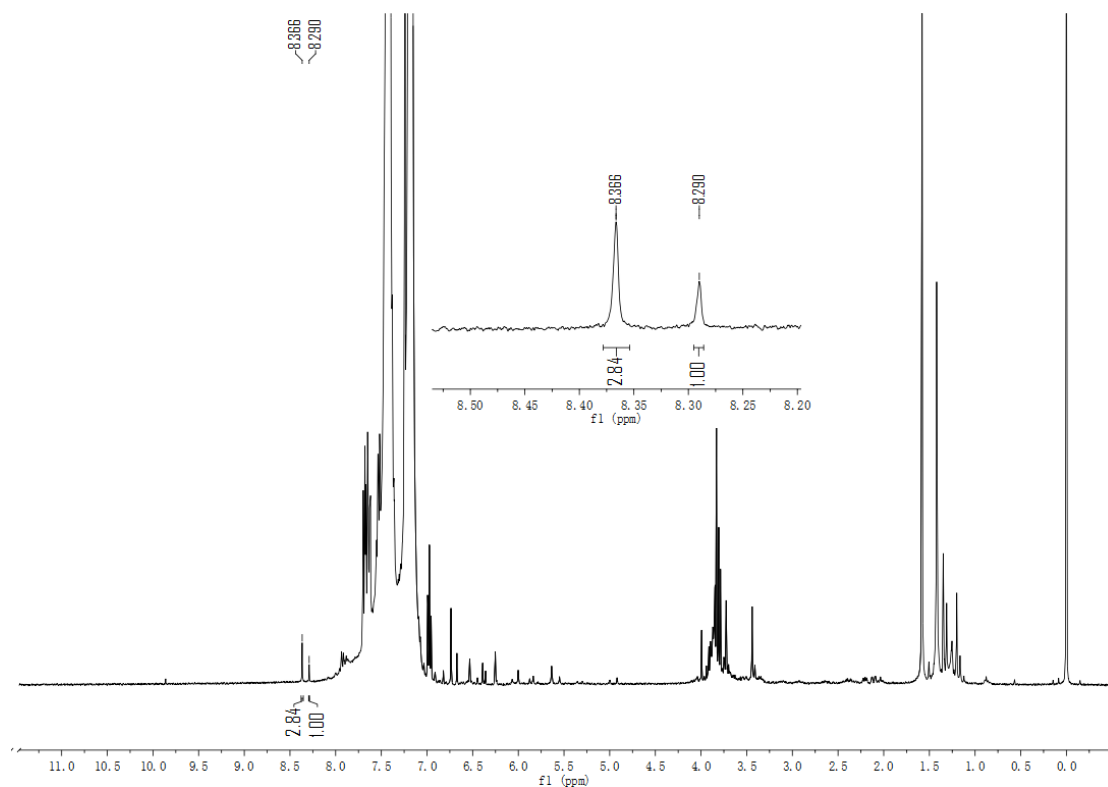

**dr = 7down/7up = 3/1**

White solid, **7down**, 38 mg, 71% yield,  $R_f = 0.25$  (ethyl acetate/hexane = 45%);

$^1\text{H}$  NMR (400 MHz,  $\text{CDCl}_3$ )  $\delta$  8.36 (s, 1H), 7.92 (d,  $J = 7.5$  Hz, 1H), 7.65 (d,  $J = 7.1$  Hz, 1H), 7.48 (d,  $J = 6.7$  Hz, 1H), 7.45 – 7.35 (m, 3H), 7.30 (t,  $J = 7.6$  Hz, 1H), 7.09 (d,  $J = 7.7$  Hz, 1H), 6.73 (s, 2H), 6.24 (s, 1H), 5.71 (s, 1H), 3.82 (s, 9H), 3.74 – 3.62 (m, 2H), 2.13 – 2.06 (m, 1H), 1.23 – 1.19 (m, 1H) ppm;

$^{13}\text{C}$  NMR (100 MHz,  $\text{CDCl}_3$ )  $\delta$  174.1, 171.6, 168.8, 154.5, 153.5, 140.0, 138.2, 136.6, 131.6, 131.2, 131.1, 130.3, 128.7, 128.4, 126.6, 125.6, 125.1, 122.1, 106.7, 64.6, 61.1, 60.9, 56.2, 52.0, 43.2, 41.3, 28.7 ppm;

**HRMS (ESI)**  $m/z$  calcd for  $\text{C}_{32}\text{H}_{36}\text{N}_3\text{O}_5^+$  ( $\text{M}+\text{H}$ ) $^+$  542.2649, found  $m/z$  542.2655.

White solid, **7up**, 7 mg, 13% yield,  $R_f = 0.5$  (ethyl acetate/hexane = 45%);

$^1\text{H}$  NMR (400 MHz,  $\text{CDCl}_3$ )  $\delta$  8.28 (s, 1H), 7.89 (d,  $J = 7.6$  Hz, 1H), 7.69 (d,  $J = 7.6$  Hz, 1H), 7.54 (d,  $J = 6.8$  Hz, 1H), 7.45 – 7.36 (m, 3H), 7.32 (t,  $J = 7.6$  Hz, 1H), 7.13 (d,  $J = 7.8$  Hz, 1H), 6.66 (s, 2H), 6.36 (s, 1H), 6.01 (s, 1H), 3.84 (s, 3H), 3.78 (s, 6H), 3.59 – 3.51 (m, 1H), 3.42 – 3.31 (m, 1H), 2.69 –

2.58 (m, 1H), 2.25 – 2.18 (m, 1H), 1.42 (s, 9H) ppm;

$^{13}\text{C}$  NMR (100 MHz,  $\text{CDCl}_3$ )  $\delta$  174.9, 171.9, 167.9, 154.8, 153.5, 140.5, 138.1, 136.6, 132.7, 131.5, 130.8, 130.4, 128.6, 128.3, 126.3, 125.7, 124.9, 122.1, 105.9, 64.5, 61.1, 60.9, 56.2, 52.0, 42.8, 39.9, 28.6 ppm;

HRMS (ESI)  $m/z$  calcd for  $\text{C}_{32}\text{H}_{36}\text{N}_3\text{O}_5^+$  ( $\text{M}+\text{H}$ ) $^+$  542.2649, found  $m/z$  542.2651.

*N*-(*tert*-butyl)-2-(4-fluorophenyl)-2-(1-oxo-3,4-dihydrospiro[benzo[*c*]azepine-5,3'-indol]-2(1*H*)-yl)acetamide ( $\pm$ )-**8**

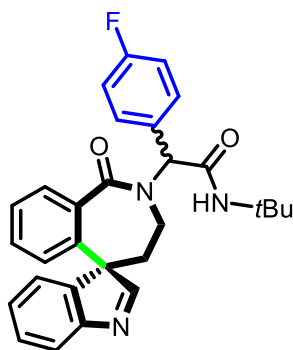

**8** crude  $^1\text{H}$  NMR

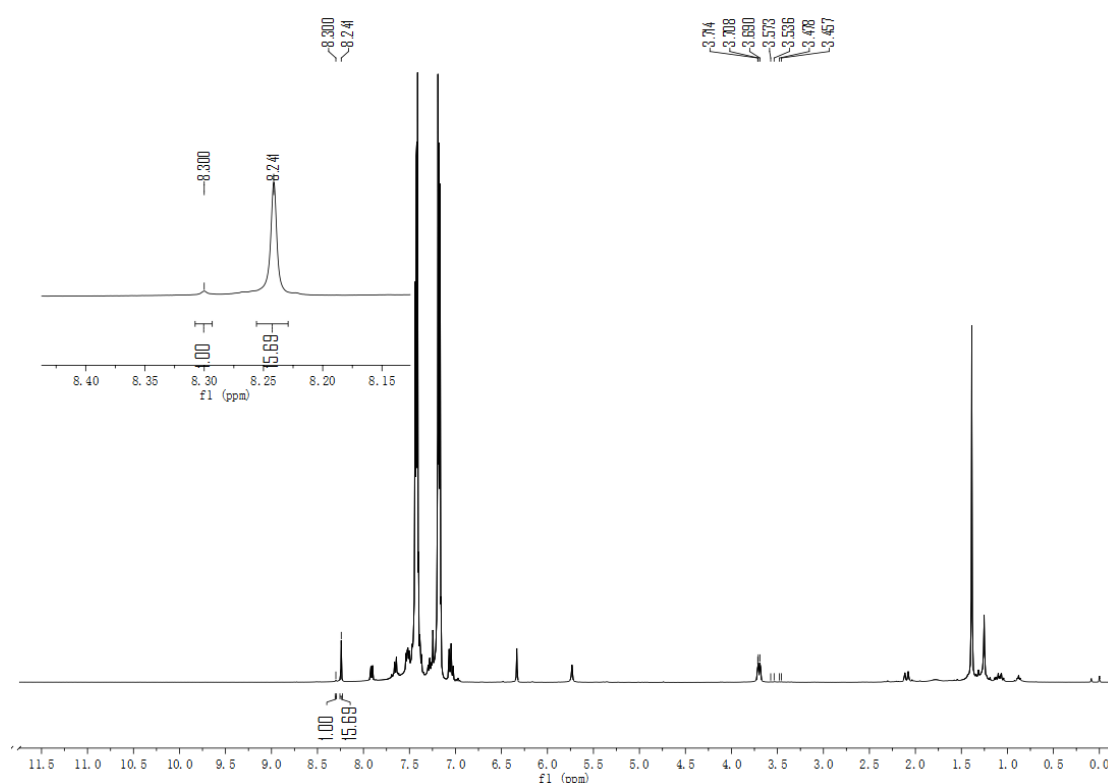

**dr = 8down/8up > 15/1**

Yellow solid, **8down**, 39 mg, 83% yield,  $R_f$  = 0.25 (ethyl acetate/hexane = 30%);

$^1\text{H}$  NMR (400 MHz,  $\text{CDCl}_3$ )  $\delta$  8.23 (s, 1H), 7.91 (d,  $J$  = 7.6 Hz, 1H), 7.66 (d,  $J$  = 7.3 Hz, 1H), 7.52 (dd,  $J$  = 8.3, 5.3 Hz, 2H), 7.47 (d,  $J$  = 7.0 Hz, 1H), 7.44 – 7.36 (m, 3H), 7.30 (t,  $J$  = 7.7 Hz, 1H), 7.06 (t,  $J$  = 8.0 Hz, 3H), 6.32 (s, 1H), 5.75 (d,  $J$  = 6.6 Hz, 1H), 3.71 – 3.69 (m, 2H), 2.12 – 2.08 (m, 1H), 1.39 (s, 9H), 1.13 – 1.05 (m, 1H) ppm;

$^{13}\text{C}$  NMR (100 MHz,  $\text{CDCl}_3$ )  $\delta$  173.9, 171.5, 168.6, 164.1, 161.6, 154.4, 140.0, 136.5, 131.6 (d,  $J = 8.1$  Hz), 131.2, 131.1, 130.9, 128.7, 128.4, 126.5, 125.6, 125.0, 122.1, 116.4, 116.2, 64.5, 60.2, 52.0, 43.0, 40.9, 28.7 ppm;

$^{19}\text{F}$  NMR (376 MHz,  $\text{CDCl}_3$ )  $\delta$  -111.69 – -111.73 (m) ppm;

HRMS (ESI)  $m/z$  calcd for  $\text{C}_{29}\text{H}_{29}\text{FN}_3\text{O}_2^+$  ( $\text{M}+\text{H}$ ) $^+$  470.2238, found  $m/z$  470.2241.

**9up** is trace and not separated

*N*-(*tert*-butyl)-2-(2-fluorophenyl)-2-(1-oxo-3,4-dihydrospiro[benzo[*c*]azepine-5,3'-indol]-2(1*H*)-yl)acetamide ( $\pm$ )-**9**

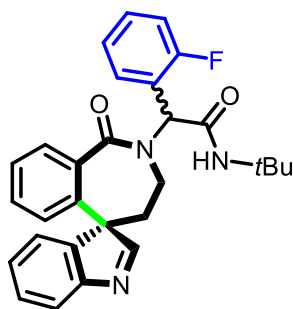

**9** crude  $^1\text{H}$  NMR

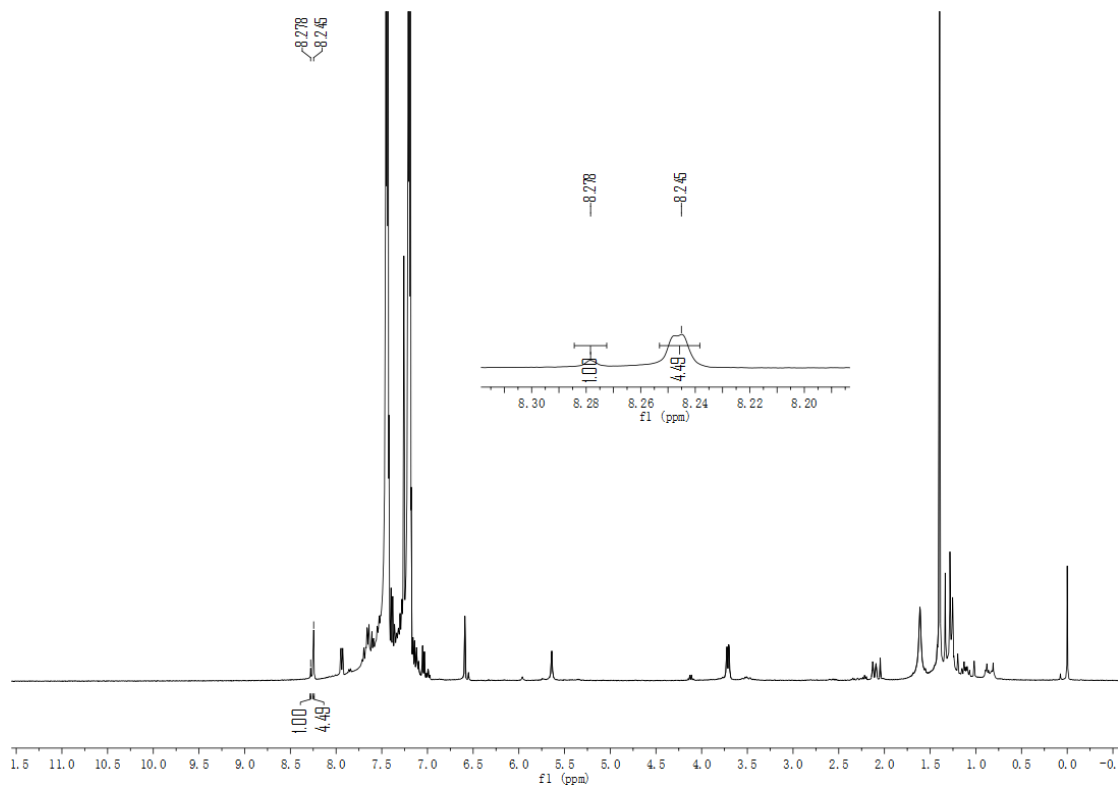

**dr = 9down/9up = 4/1**

Yellow solid, **9down**, 36 mg, 77% yield,  $R_f = 0.25$  (ethyl acetate/hexane = 30%);

$^1\text{H}$  NMR (400 MHz,  $\text{CDCl}_3$ )  $\delta$  8.24 (s, 1H), 7.93 (d,  $J = 7.6$  Hz, 1H), 7.63 (dd,  $J = 16.0, 7.4$  Hz, 2H), 7.46 (d,  $J = 7.2$  Hz, 1H), 7.39 (dd,  $J = 15.1, 7.4$  Hz, 3H), 7.31 (dd,  $J = 14.7, 7.8$  Hz, 2H), 7.20 – 7.08 (m, 2H), 7.04 (d,  $J = 7.8$  Hz, 1H), 6.60 (s, 1H), 5.70 (s, 1H), 3.78 – 3.63 (m, 2H), 2.11 (d,  $J = 14.3$  Hz, 1H), 1.40 (s, 9H), 1.12 (dt,  $J = 14.3, 9.5$  Hz, 1H) ppm;

$^{13}\text{C}$  NMR (100 MHz,  $\text{CDCl}_3$ )  $\delta$  174.4 (d,  $J = 5.4$  Hz), 171.3, 168.1, 161.1 (d,  $J = 247.5$  Hz), 154.7, 140.1, 136.6, 131.5, 131.2 (d,  $J = 8.7$  Hz), 131.1, 130.9, 128.5, 128.3, 126.3, 125.6, 125.0, 124.7 (d,  $J = 3.7$  Hz), 122.6 (d,  $J = 14.3$  Hz), 122.0, 116.4, 116.2, 64.5, 54.5, 52.0, 43.2, 40.4, 28.7 ppm;

$^{19}\text{F}$  NMR (376 MHz,  $\text{CDCl}_3$ )  $\delta$  -109.5 – -114.2 (m);

HRMS (ESI)  $m/z$  calcd for  $\text{C}_{29}\text{H}_{29}\text{FN}_3\text{O}_2^+$  ( $\text{M}+\text{H}$ ) $^+$  470.2238, found  $m/z$  470.2249.

Yellow solid, **9up**, 7 mg, 15% yield,  $R_f = 0.25$  (ethyl acetate/hexane = 30%);

$^1\text{H}$  NMR (400 MHz,  $\text{CDCl}_3$ )  $\delta$  8.31 (s, 1H), 7.86 (d,  $J = 7.6$  Hz, 1H), 7.70 (d,  $J = 7.3$  Hz, 1H), 7.54 – 7.45 (m, 2H), 7.44 – 7.38 (m, 3H), 7.35 – 7.29 (m, 2H), 7.18 – 7.05 (m, 3H), 6.61 (s, 1H), 6.27 (s, 1H), 3.58 – 3.43 (m, 2H), 2.62– 2.53 (m, 1H), 2.30– 2.27 (m, 1H), 1.38 (s, 9H) ppm;

$^{13}\text{C}$  NMR (100 MHz,  $\text{CDCl}_3$ )  $\delta$  174.7, 171.5, 161.1 (d,  $J = 249.0$  Hz), 159.9, 154.8, 140.3, 136.7, 132.1, 131.4, 130.4 (d,  $J = 8.4$  Hz), 129.8, 128.6, 128.3, 126.3, 125.7, 125.0, 124.5 (d,  $J = 3.6$  Hz), 122.1, 116.0 (d,  $J = 21.6$  Hz), 64.5, 56.5, 52.1, 43.0, 40.1, 28.5 ppm;

$^{19}\text{F}$  NMR (376 MHz,  $\text{CDCl}_3$ )  $\delta$  -114.16 – -114.34 (m)

HRMS (ESI)  $m/z$  calcd for  $\text{C}_{29}\text{H}_{29}\text{FN}_3\text{O}_2^+$  ( $\text{M}+\text{H}$ ) $^+$  470.2238, found  $m/z$  470.2245.

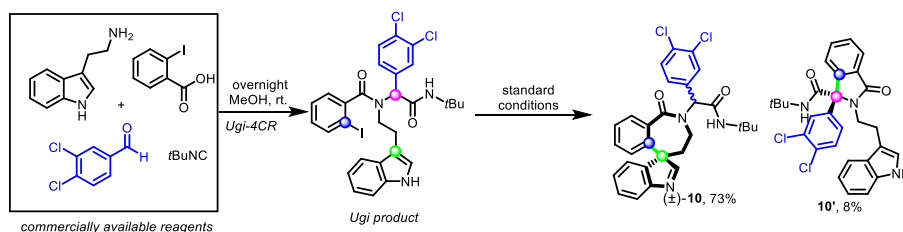

*N*-(*tert*-butyl)-2-(3,4-dichlorophenyl)-2-(1-oxo-3,4-dihydrospiro[benzo[*c*]azepine-5,3'-indol]-2(1*H*)-yl)acetamide (±)-**10**

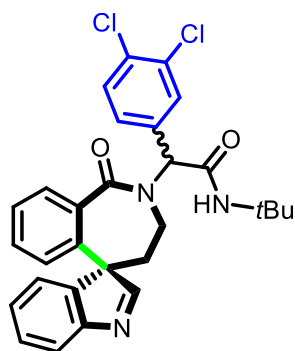

**10** crude  $^1\text{H}$  NMR



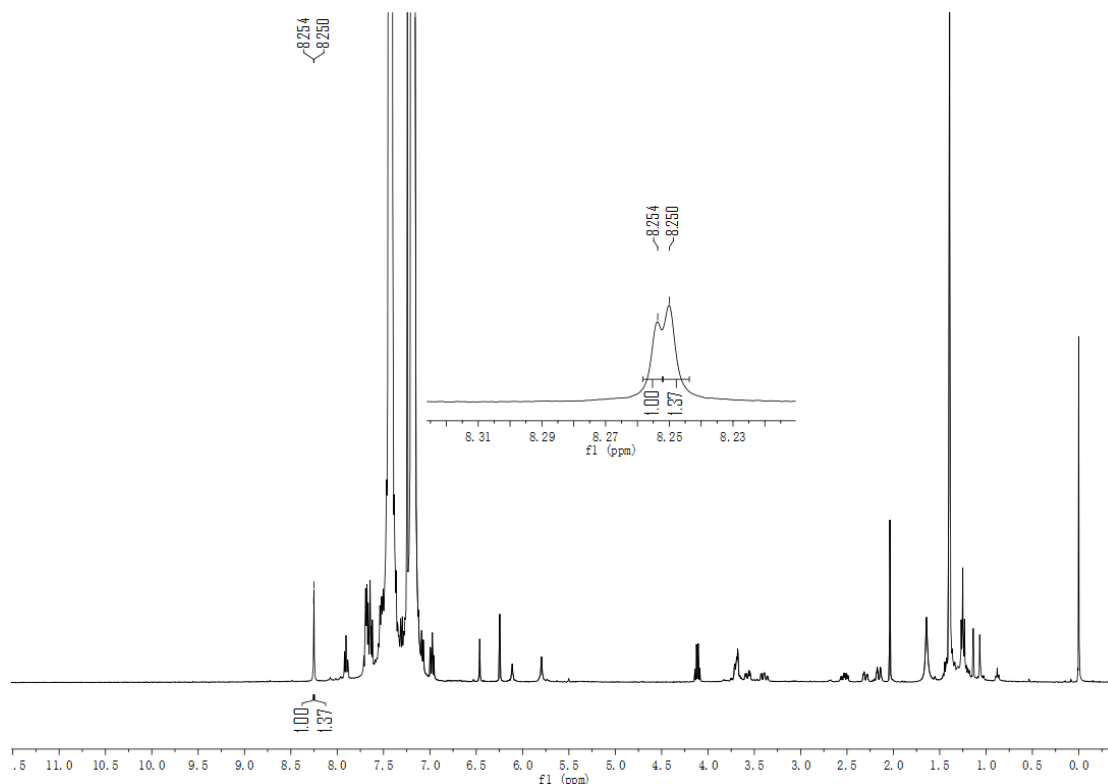

**dr = 10down/10up = 1.4/1**

Yellow solid, **10down**, 21 mg, 41% yield, Rf = 0.25 (ethyl acetate/hexane = 30%);

**<sup>1</sup>H NMR** (400 MHz, CDCl<sub>3</sub>) δ 8.26 (s, 1H), 7.90 (d, *J* = 7.6 Hz, 1H), 7.68 (d, *J* = 7.5 Hz, 2H), 7.49 (d, *J* = 6.7 Hz, 1H), 7.45 – 7.29 (m, 6H), 7.08 (d, *J* = 7.8 Hz, 1H), 6.27 (s, 1H), 5.97 (s, 1H), 3.70 (dd, *J* = 10.7, 3.1 Hz, 2H), 2.20 – 2.13 (m, 1H), 1.39 (s, 9H), 1.24 – 1.17 (m, 1H) ppm;

**<sup>13</sup>C NMR** (100 MHz, CDCl<sub>3</sub>) δ 173.8, 171.8, 167.9, 154.4, 140.0, 136.2, 135.2, 133.4, 131.8, 131.4, 131.1, 129.2, 128.8, 128.5, 126.7, 125.7, 125.0, 122.2, 64.4, 59.9, 52.1, 43.2, 40.8, 28.6 ppm;

**HRMS (ESI)** *m/z* calcd for C<sub>29</sub>H<sub>28</sub>Cl<sub>2</sub>N<sub>3</sub>O<sub>2</sub><sup>+</sup> (M+H)<sup>+</sup> 520.1553, found *m/z* 520.1558.

Yellow solid, **10up**, 17 mg, 32% yield, Rf = 0.5 (ethyl acetate/hexane = 30%);

**<sup>1</sup>H NMR** (400 MHz, CDCl<sub>3</sub>) δ 8.26 (s, 1H), 7.83 (d, *J* = 7.6 Hz, 1H), 7.63 (d, *J* = 6.5 Hz, 1H), 7.47 (d, *J* = 7.5 Hz, 1H), 7.40 (s, 1H), 7.37 – 7.31 (m, 2H), 7.32 (d, *J* = 8.2 Hz, 1H), 7.27 (d, *J* = 7.2 Hz, 1H), 7.19 (s, 1H), 7.16 (d, *J* = 8.3 Hz, 1H), 7.06 (d, *J* = 7.8 Hz, 1H), 6.63 (s, 1H), 6.45 (s, 1H), 3.59 (dd, *J* = 14.7, 4.8 Hz, 1H), 3.35 (td, *J* = 14.5, 4.3 Hz, 1H), 2.51 – 2.38 (m, 1H), 2.25 (dd, *J* = 14.4, 3.5 Hz, 1H), 1.29 (s, 9H) ppm;

**<sup>13</sup>C NMR** (100 MHz, CDCl<sub>3</sub>) δ 173.3, 170.9, 166.0, 153.5, 139.0, 135.2, 135.1, 132.0, 131.5, 131.1, 130.8, 129.8, 129.5, 129.2, 127.7, 127.4, 126.6, 125.5, 124.8, 124.1, 121.1, 63.5, 58.0, 51.2, 41.8, 39.0, 27.5 ppm;

**HRMS (ESI)** *m/z* calcd for C<sub>29</sub>H<sub>28</sub>Cl<sub>2</sub>N<sub>3</sub>O<sub>2</sub><sup>+</sup> (M+H)<sup>+</sup> 520.1553, found *m/z* 520.1558.

**2-(2-(1*H*-indol-3-yl)ethyl)-*N*-(*tert*-butyl)-1-(3,4-dichlorophenyl)-3-oxoisindoline-1-carboxamide (10')**

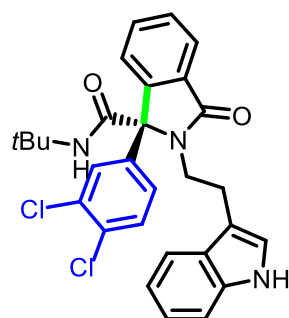

White solid, **10'**, 4 mg, 8% yield, Rf = 0.4 (ethyl acetate/hexane = 30%);

**<sup>1</sup>H NMR** (400 MHz, CDCl<sub>3</sub>) δ 8.11 (s, 1H), 7.94 (d, *J* = 6.5 Hz, 1H), 7.60 (p, *J* = 6.7 Hz, 2H), 7.53 (d, *J* = 7.6 Hz, 2H), 7.38 (d, *J* = 8.4 Hz, 1H), 7.32 (d, *J* = 7.9 Hz, 1H), 7.25 (d, *J* = 2.0 Hz, 1H), 7.16 (dt, *J* = 20.7, 7.2 Hz, 2H), 7.05 (s, 1H), 6.98 (dd, *J* = 8.5, 2.0 Hz, 1H), 5.86 (s, 1H), 3.69 (t, *J* = 8.0 Hz, 2H), 3.16 – 2.96 (m, 1H), 2.58-2.51 (m, 1H), 1.15 (s, 9H) ppm;

**<sup>13</sup>C NMR** (100 MHz, CDCl<sub>3</sub>) δ 169.6, 167.4, 145.9, 138.0, 136.3, 133.2, 133.0, 132.9, 130.7, 130.6, 129.7, 128.1, 127.1, 123.9, 123.7, 122.3, 122.0, 119.6, 118.8, 112.5, 111.2, 75.4, 52.0, 42.8, 28.2, 23.8 ppm;

**HRMS (ESI)** *m/z* calcd for C<sub>29</sub>H<sub>28</sub>Cl<sub>2</sub>N<sub>3</sub>O<sub>2</sub><sup>+</sup> (M+H)<sup>+</sup> 520.1553, found *m/z* 520.1557.

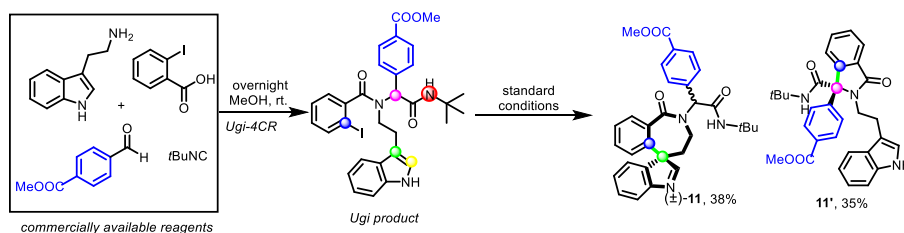

**methyl-4-(2-(tert-butylamino)-2-oxo-1-(1-oxo-3,4-dihydrospiro[benzo[c]azepine-5,3'-indol]-2(1H)-yl)ethyl)benzoate (±)-11**

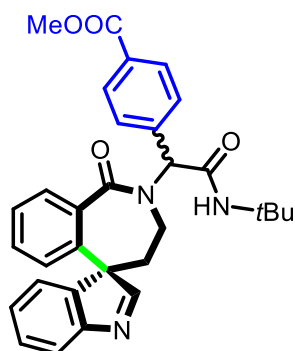

**11** crude <sup>1</sup>H NMR

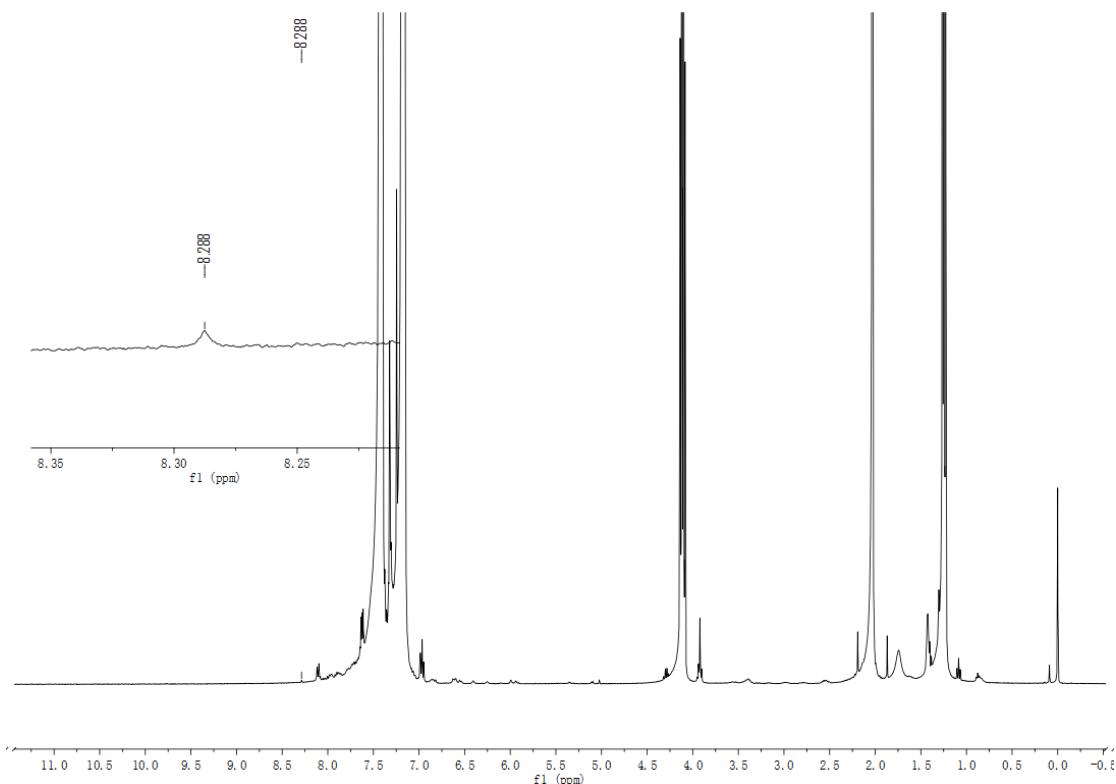

**dr = 11down/11up > 15/1**

White solid, **11up**, 19 mg, 38% yield, R<sub>f</sub> = 0.3 (ethyl acetate/hexane = 30%);

**<sup>1</sup>H NMR** (400 MHz, CDCl<sub>3</sub>) δ 8.31 (s, 1H), 8.02 (d, *J* = 8.2 Hz, 2H), 7.91 (d, *J* = 7.5 Hz, 1H), 7.70 (d, *J* = 6.7 Hz, 1H), 7.53 (d, *J* = 7.4 Hz, 1H), 7.45 – 7.41 (m, 5H), 7.33 (t, *J* = 7.2 Hz, 1H), 7.13 (d, *J* = 7.8 Hz, 1H), 6.58 (s, 1H), 6.49 (s, 1H), 3.92 (s, 3H), 3.62 – 3.57 (m, 1H), 3.45 – 3.37 (m, 1H), 2.59 – 2.51 (m, 1H), 2.31 – 2.27 (m, 1H), 1.40 (s, 9H) ppm;

**<sup>13</sup>C NMR** (100 MHz, CDCl<sub>3</sub>) δ 174.4, 172.0, 167.4, 166.6, 154.6, 140.7, 140.1, 136.3, 132.2, 131.7, 130.4, 130.1, 128.7, 128.4, 128.2, 126.5, 125.8, 125.0, 122.1, 64.5, 60.1, 52.3, 43.0, 40.0, 28.6 ppm;

**HRMS (ESI)** *m/z* calcd for C<sub>31</sub>H<sub>32</sub>N<sub>3</sub>O<sub>4</sub><sup>+</sup> 510.2387, found *m/z* 510.2391.

**11down** is trace and not separated

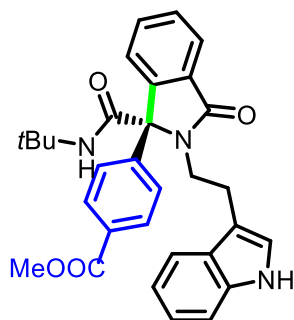

Yellow solid, **11'**, 18 mg, 35% yield, R<sub>f</sub> = 0.4 (ethyl acetate/hexane = 30%);

**<sup>1</sup>H NMR** (400 MHz, CDCl<sub>3</sub>) δ 8.19 (s, 1H), 8.00 (d, *J* = 8.3 Hz, 2H), 7.94 (d, *J* = 7.0 Hz, 1H), 7.62 – 7.54 (m, 3H), 7.52 (d, *J* = 7.7 Hz, 1H), 7.30 (d, *J* = 8.0 Hz, 1H), 7.24 (s, 1H), 7.16 (t, *J* = 7.5 Hz, 1H), 7.09 (t, *J* = 7.4 Hz, 1H), 6.99 (s, 1H), 5.91 (s, 1H), 3.91 (s, 3H), 3.71 – 3.67 (m, 2H), 3.05 – 2.98 (m, 1H), 2.44 – 2.37 (m, 1H), 1.18 (s, 9H) ppm;

$^{13}\text{C}$  NMR (100 MHz,  $\text{CDCl}_3$ )  $\delta$  169.7, 167.8, 166.5, 146.2, 142.9, 136.3, 133.0, 130.9, 130.3, 129.9, 129.6, 128.7, 127.2, 123.8, 123.7, 122.1, 122.0, 119.5, 118.9, 112.6, 111.2, 76.0, 52.3, 52.0, 42.9, 28.2, 23.7 ppm;

HRMS (ESI)  $m/z$  calcd for  $\text{C}_{31}\text{H}_{32}\text{N}_3\text{O}_4^+$  ( $\text{M}+\text{H}$ ) $^+$  510.2387, found  $m/z$  510.2388.

*N*-(*tert*-butyl)-2-(naphthalen-1-yl)-2-(1-oxo-3,4-dihydrospiro[benzo[*c*]azepine-5,3'-indol]-2(1*H*)-yl)acetamide ( $\pm$ )-**12**

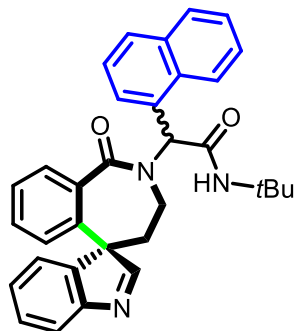

**12** crude  $^1\text{H}$  NMR

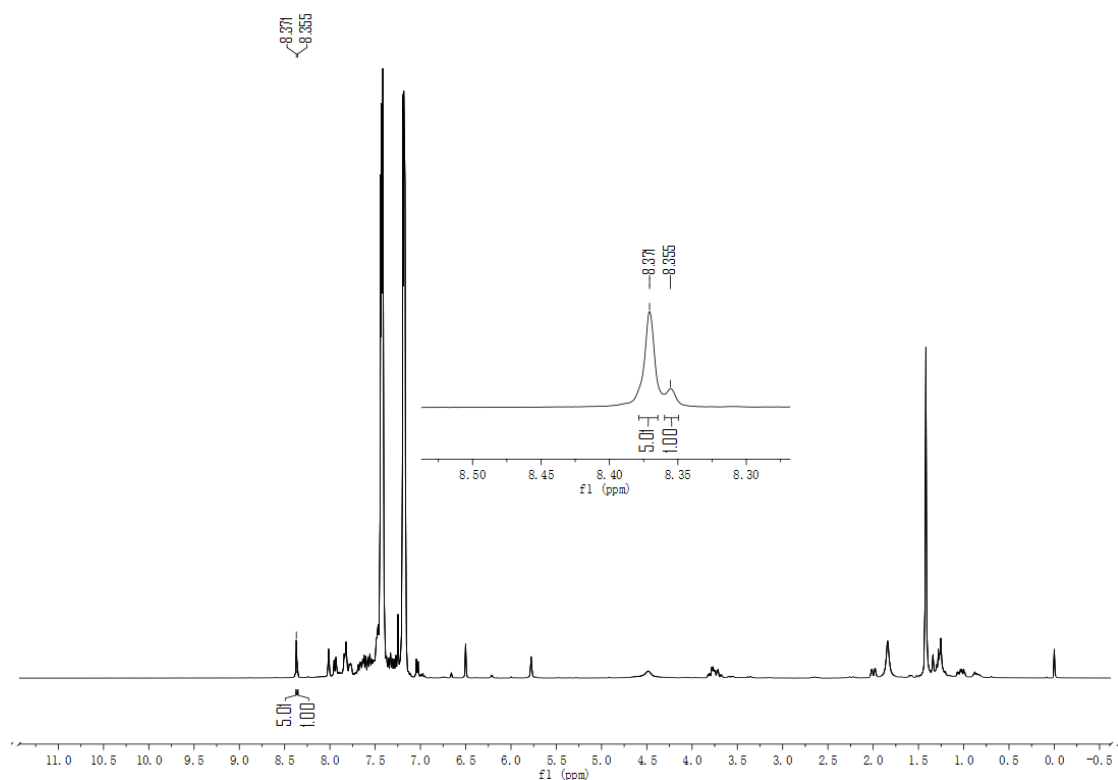

**dr = 12down/12up = 5/1**

Yellow solid, **12down**, 35 mg, 70% yield,  $R_f$  = 0.25 (ethyl acetate/hexane = 30%);

$^1\text{H}$  NMR (400 MHz,  $\text{CDCl}_3$ )  $\delta$  8.36 (s, 1H), 8.01 (s, 1H), 7.94 (d,  $J$  = 7.6 Hz, 1H), 7.85 – 7.78 (m, 3H), 7.62 (d,  $J$  = 7.5 Hz, 1H), 7.57 (d,  $J$  = 8.5 Hz, 1H), 7.49 (dd,  $J$  = 6.2, 3.2 Hz, 2H), 7.42 – 7.36 (m, 3H), 7.34 – 7.28 (m, 2H), 7.04 (d,  $J$  = 7.8 Hz, 1H), 6.49 (s, 1H), 5.74 (s, 1H), 3.82 – 3.67 (m, 2H), 2.03 – 1.98 (m, 1H), 1.42 (s, 9H), 1.07 – 0.99 (m, 1H) ppm;

$^{13}\text{C}$  NMR (100 MHz,  $\text{CDCl}_3$ )  $\delta$  174.1, 171.7, 168.8, 154.4, 140.0, 136.7, 133.2, 133.1, 132.4, 131.5, 131.3, 131.1, 129.1, 128.6, 128.4, 128.2, 127.7, 127.2, 127.0, 126.8, 126.4, 125.6, 125.0, 122.0, 64.5,

61.3, 52.0, 43.2, 40.8, 28.8 ppm;

**HRMS (ESI)**  $m/z$  calcd for  $C_{33}H_{32}N_3O_2^+$  (M+H)<sup>+</sup> 502.2489, found  $m/z$  502.2494.

Yellow solid, **12up**, 8 mg, 15% yield,  $R_f = 0.5$  (ethyl acetate/hexane = 30%);

**<sup>1</sup>H NMR** (400 MHz, CDCl<sub>3</sub>)  $\delta$  8.35 (s, 1H), 7.93 (d,  $J = 5.4$  Hz, 2H), 7.84 – 7.78 (m, 3H), 7.71 (d,  $J = 7.4$  Hz, 1H), 7.53 – 7.49 (m, 3H), 7.47 – 7.38 (m, 4H), 7.31 (t,  $J = 7.6$  Hz, 1H), 7.12 (d,  $J = 7.8$  Hz, 1H), 6.67 (s, 1H), 6.17 (s, 1H), 3.60 – 3.55 (m, 1H), 3.42 – 3.28 (m, 1H), 2.74 – 2.58 (m, 1H), 2.26 – 2.22 (m, 1H), 1.43 (s, 9H) ppm;

**<sup>13</sup>C NMR** (100 MHz, CDCl<sub>3</sub>)  $\delta$  174.8, 171.9, 167.9, 154.8, 140.3, 136.7, 133.2, 133.0, 132.4, 131.5, 130.4, 128.9, 128.6, 128.2, 128.0, 127.6, 126.7, 126.6, 126.3, 126.0, 125.8, 125.0, 122.1, 64.6, 60.9, 52.1, 42.8, 40.1, 28.7 ppm;

**HRMS (ESI)**  $m/z$  calcd for  $C_{33}H_{32}N_3O_2^+$  (M+H)<sup>+</sup> 502.2489, found  $m/z$  502.2499.

*N*-(*tert*-butyl)-2-(1-oxo-3,4-dihydrospiro[benzo[*c*]azepine-5,3'-indol]-2(1*H*)-yl)-2-(pyridin-3-yl)acetamide ( $\pm$ )-**13**

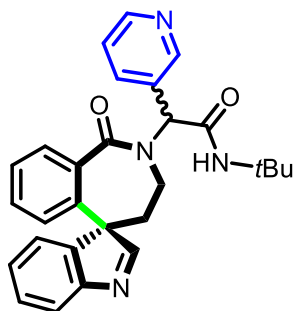

**13** crude <sup>1</sup>H NMR

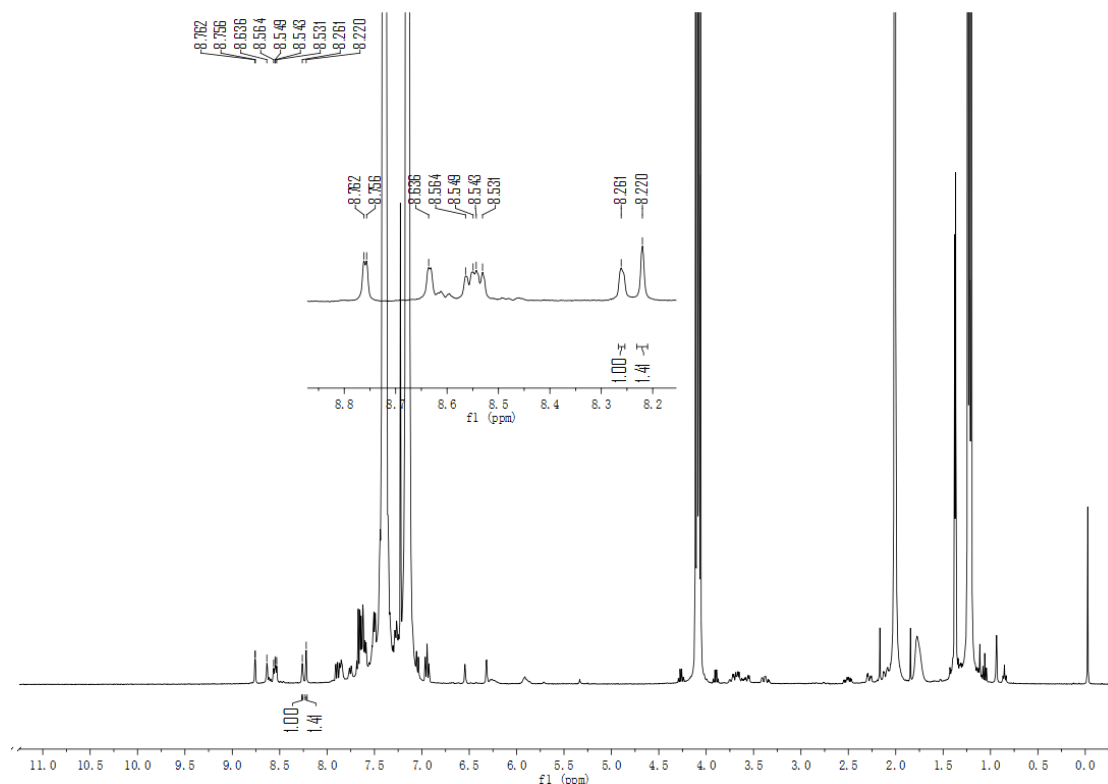

**dr = 13down/13up = 1.4/1**

Yellow solid, **13down**, 28 mg, 63% yield, Rf = 0.25 (ethyl acetate/hexane = 40%);

**<sup>1</sup>H NMR** (400 MHz, CDCl<sub>3</sub>) δ 8.77 (s, 1H), 8.58 (d, *J* = 4.2 Hz, 1H), 8.22 (s, 1H), 7.91 (t, *J* = 8.4 Hz, 2H), 7.65 (d, *J* = 7.0 Hz, 1H), 7.47 (d, *J* = 7.0 Hz, 1H), 7.44 – 7.30 (m, 5H), 7.08 (d, *J* = 7.8 Hz, 1H), 6.34 (s, 1H), 6.01 (s, 1H), 3.78 – 3.64 (m, 2H), 2.16 – 2.13 (m, 1H), 1.39 (s, 9H), 1.20 – 1.12 (m, 1H) ppm;

**<sup>13</sup>C NMR** (100 MHz, CDCl<sub>3</sub>) δ 173.6, 171.8, 167.7, 154.4, 150.6, 150.2, 139.9, 137.5, 136.2, 131.8, 131.4, 131.1, 128.7, 128.5, 126.6, 125.7, 125.0, 123.9, 122.2, 64.4, 59.2, 52.1, 43.2, 40.7, 28.7 ppm;

**HRMS (ESI)** *m/z* calcd for C<sub>28</sub>H<sub>29</sub>N<sub>4</sub>O<sub>2</sub><sup>+</sup> (M+H)<sup>+</sup> 453.2285, found *m/z* 453.2286.

Yellow oil, **13up**, 9 mg, 21% yield, Rf = 0.4 (ethyl acetate/hexane = 40%);

**<sup>1</sup>H NMR** (400 MHz, CDCl<sub>3</sub>) δ 8.56 (s, 1H), 8.50 (s, 1H), 8.24 (s, 1H), 7.83 (d, *J* = 7.6 Hz, 1H), 7.68 (d, *J* = 7.9 Hz, 1H), 7.63 (d, *J* = 6.7 Hz, 1H), 7.47 (d, *J* = 7.5 Hz, 1H), 7.41 – 7.32 (m, 3H), 7.29 – 7.20 (m, 2H), 7.06 (d, *J* = 7.8 Hz, 1H), 6.60 (s, 1H), 6.55 (s, 1H), 3.56 (dd, *J* = 14.7, 5.1 Hz, 1H), 3.40 – 3.29 (m, 1H), 2.51 – 2.40 (m, 1H), 2.25 (dd, *J* = 14.4, 3.4 Hz, 1H), 1.32 (s, 9H) ppm;

**<sup>13</sup>C NMR** (100 MHz, CDCl<sub>3</sub>) δ 173.2, 171.0, 166.0, 153.6, 148.7, 148.4, 139.0, 135.2, 135.0, 131.1, 130.7, 129.4, 127.7, 127.4, 125.50 (s), 124.8, 124.0, 122.6, 121.1, 63.5, 57.1, 51.3, 41.8, 39.0, 27.5;

**HRMS (ESI)** *m/z* calcd for C<sub>28</sub>H<sub>29</sub>N<sub>4</sub>O<sub>2</sub><sup>+</sup> (M+H)<sup>+</sup> 453.2285, found *m/z* 453.2284.

***N*-(*tert*-butyl)-3-methyl-2-(1-oxo-3,4-dihydrospiro[benzo[*c*]azepine-5,3'-indol]-2(1*H*)-yl)butanamide (±)-14**

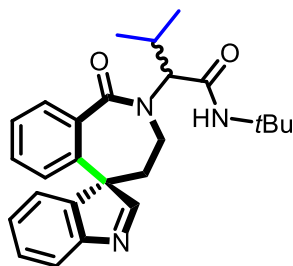

Yellow solid, **14down**, 34 mg, 82% yield,  $R_f = 0.4$  (ethyl acetate/hexane = 30%);

$^1\text{H NMR}$  (400 MHz,  $\text{CDCl}_3$ )  $\delta$  8.20 (s, 1H), 7.79 (d,  $J = 7.5$  Hz, 1H), 7.74 – 7.65 (m, 1H), 7.61 – 7.50 (m, 1H), 7.47 – 7.37 (m, 3H), 7.30 (dd,  $J = 10.8, 4.5$  Hz, 1H), 7.10 (d,  $J = 7.8$  Hz, 1H), 6.35 (s, 1H), 4.82 (d,  $J = 10.9$  Hz, 1H), 3.88 (dd,  $J = 14.5, 4.4$  Hz, 1H), 3.47 (td,  $J = 14.4, 4.2$  Hz, 1H), 2.40 – 2.30 (m, 2H), 2.28 – 2.20 (m, 1H), 1.34 (s, 9H), 1.01 (d,  $J = 6.4$  Hz, 3H), 0.90 (d,  $J = 6.7$  Hz, 3H) ppm;

$^{13}\text{C NMR}$  (100 MHz,  $\text{CDCl}_3$ )  $\delta$  174.3, 171.8, 169.0, 154.6, 140.0, 137.1, 131.4, 131.3, 130.0, 128.7, 128.3, 126.6, 125.6, 125.1, 122.1, 64.3, 62.7, 51.9, 41.1, 39.9, 28.5, 27.5, 19.2, 18.3;

**HRMS (ESI)**  $m/z$  calcd for  $\text{C}_{26}\text{H}_{32}\text{N}_3\text{O}_2^+$  ( $\text{M}+\text{H}$ ) $^+$  418.2489, found  $m/z$  418.2488.

**14up** is trace and not separated

*N*-(*tert*-butyl)-2-(8-methyl-1-oxo-3,4-dihydrospiro[benzo[*c*]azepine-5,3'-indol]-2(1*H*)-yl)-2-phenylacetamide ( $\pm$ )-**15**

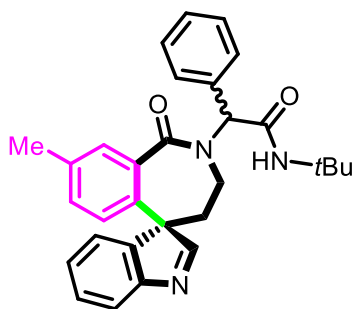

White solid, **15down**, 35 mg, 76% yield,  $R_f = 0.5$  (ethyl acetate/hexane = 30%);

$^1\text{H NMR}$  (400 MHz,  $\text{CDCl}_3$ )  $\delta$  8.23 (s, 1H), 7.74 (s, 1H), 7.64 (d,  $J = 7.3$  Hz, 1H), 7.51 (d,  $J = 7.4$  Hz, 2H), 7.44 (d,  $J = 6.9$  Hz, 1H), 7.41 – 7.28 (m, 5H), 7.07 (d,  $J = 7.8$  Hz, 1H), 6.91 (d,  $J = 7.9$  Hz, 1H), 6.34 (s, 1H), 5.64 (s, 1H), 3.76 – 3.62 (m, 2H), 2.35 (s, 3H), 2.04 – 2.01 (m, 1H), 1.40 (s, 9H), 1.09 – 0.98 (m, 1H) ppm;

$^{13}\text{C NMR}$  (100 MHz,  $\text{CDCl}_3$ )  $\delta$  174.3, 171.7, 168.7, 154.6, 140.3, 138.3, 136.4, 135.1, 132.1, 131.7, 129.8, 129.2, 129.0, 128.5, 128.2, 126.3, 125.6, 125.0, 122.0, 64.2, 61.2, 51.9, 43.2, 40.6, 28.7, 20.8;

**HRMS (ESI)**  $m/z$  calcd for  $\text{C}_{30}\text{H}_{32}\text{N}_3\text{O}_2^+$  466.2489, found  $m/z$  466.2497.

**15up** is trace and not separated

*N*-(*tert*-butyl)-2-(7,8-dimethoxy-1-oxo-3,4-dihydrospiro[benzo[*c*]azepine-5,3'-indol]-2(1*H*)-yl)-2-phenylacetamide ( $\pm$ )-**16**

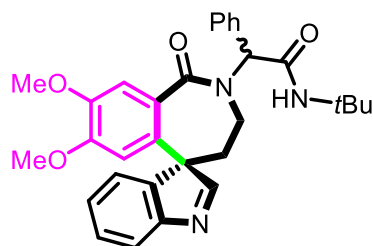

Yellow solid, **16down**, 43 mg, 83% yield,  $R_f = 0.3$  (ethyl acetate/hexane = 40%);

$^1\text{H NMR}$  (400 MHz,  $\text{CDCl}_3$ )  $\delta$  8.21 (s, 1H), 7.65 (d,  $J = 7.4$  Hz, 1H), 7.51 – 7.46 (m, 4H), 7.42 – 7.33 (m, 5H), 6.51 (s, 1H), 6.31 (s, 1H), 5.59 (s, 1H), 3.94 (s, 3H), 3.78 – 3.67 (m, 2H), 3.64 (s, 3H), 2.08 – 2.03 (m, 1H), 1.40 (s, 9H), 1.06 – 0.98 (m, 1H) ppm;

$^{13}\text{C NMR}$  (100 MHz,  $\text{CDCl}_3$ )  $\delta$  174.5, 171.4, 168.8, 154.6, 150.9, 148.5, 140.6, 135.3, 129.9, 129.2, 129.1, 129.0, 128.6, 126.4, 124.5, 124.4, 122.2, 114.0, 109.0, 64.3, 61.4, 56.1, 55.7, 52.0, 43.4, 40.9, 28.8;

**HRMS (ESI)**  $m/z$  calcd for  $\text{C}_{31}\text{H}_{34}\text{N}_3\text{O}_4^+$  512.2544, found  $m/z$  512.2548.

**16up** is trace and not separated

*N*-(*tert*-butyl)-2-(8-fluoro-1-oxo-3,4-dihydrospiro[benzo[*c*]azepine-5,3'-indol]-2(1*H*)-yl)-2-phenylacetamide ( $\pm$ )-**17**

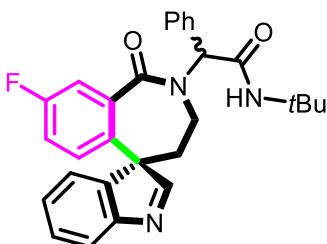

Yellow solid, **17down**, 38 mg, 80% yield,  $R_f = 0.25$  (ethyl acetate/hexane = 30%);

$^1\text{H NMR}$  (400 MHz,  $\text{CDCl}_3$ )  $\delta$  8.22 (s, 1H), 7.66 – 7.61 (m, 2H), 7.50 (d,  $J = 7.5$  Hz, 2H), 7.46 – 7.40 (m, 2H), 7.39 – 7.30 (m, 4H), 7.03 (dd,  $J = 8.4, 5.4$  Hz, 1H), 6.99 – 6.92 (m, 1H), 6.34 (s, 1H), 5.74 (s, 1H), 3.79 – 3.60 (m, 2H), 2.07 – 2.02 (m, 1H), 1.39 (s, 9H), 1.11 – 0.97 (m, 1H) ppm;

$^{13}\text{C NMR}$  (100 MHz,  $\text{CDCl}_3$ )  $\delta$  173.9, 170.2, 168.5, 162.4 (d,  $J = 248.9$  Hz), 154.4, 140.0, 138.7 (d,  $J = 7.3$  Hz), 134.9, 129.8, 129.3, 129.1, 128.7, 127.6 (d,  $J = 7.6$  Hz), 127.2 (d,  $J = 3.3$  Hz), 126.6, 124.9, 122.1, 118.2 (dd,  $J = 22.2, 15.1$  Hz), 63.9, 61.3, 52.0, 43.2, 40.6, 28.7;

**HRMS (ESI)**  $m/z$  calcd for  $\text{C}_{29}\text{H}_{29}\text{FN}_3\text{O}_2^+$  ( $\text{M}+\text{H}$ ) $^+$  470.2238, found  $m/z$  470.2242.

$\pm$ **17up** is trace and not separated

*N*-(*tert*-butyl)-2-(7-chloro-1-oxo-3,4-dihydrospiro[benzo[*c*]azepine-5,3'-indol]-2(1*H*)-yl)-2-phenylacetamide ( $\pm$ )-**18**

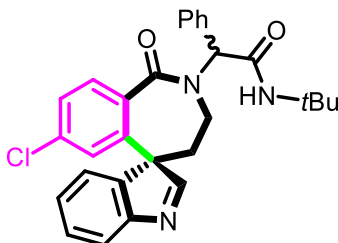

**18** crude  $^1\text{H NMR}$



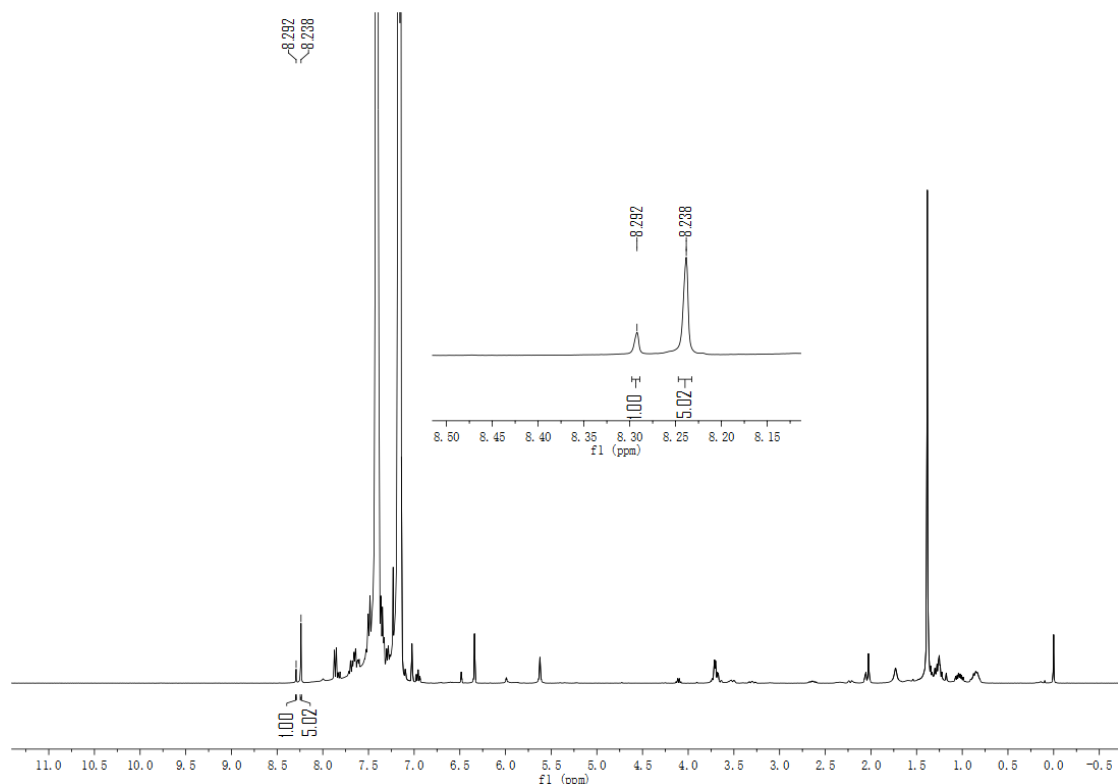

**dr = 18down/18up = 5/1**

Yellow solid, **18down**, 34 mg, 70% yield,  $R_f = 0.25$  (ethyl acetate/hexane = 30%);

$^1\text{H NMR}$  (400 MHz,  $\text{CDCl}_3$ )  $\delta$  8.22 (s, 1H), 7.86 (d,  $J = 8.3$  Hz, 1H), 7.66 (d,  $J = 7.2$  Hz, 1H), 7.49 (d,  $J = 7.3$  Hz, 2H), 7.46 – 7.35 (m, 6H), 7.32 – 7.29 (m, 1H), 7.02 (s, 1H), 6.34 (s, 1H), 5.72 (s, 1H), 3.75 – 3.62 (m, 2H), 2.07 – 2.03 (m, 1H), 1.39 (s, 9H), 1.08 – 0.99 (m, 1H) ppm;

$^{13}\text{C NMR}$  (100 MHz,  $\text{CDCl}_3$ )  $\delta$  173.3, 170.6, 168.6, 154.4, 139.4, 137.6, 135.1, 134.9, 133.4, 132.6, 129.8, 129.3, 129.1, 128.9, 128.4, 126.9, 125.8, 124.8, 122.2, 64.2, 61.2, 52.0, 43.1, 40.7, 28.7;

**HRMS (ESI)**  $m/z$  calcd for  $\text{C}_{29}\text{H}_{29}\text{ClN}_3\text{O}_2^+$  ( $\text{M}+\text{H}$ ) $^+$  486.1943, found  $m/z$  486.1942.

Yellow solid, **18up**, 4 mg, 8% yield,  $R_f = 0.5$  (ethyl acetate/hexane = 30%);

$^1\text{H NMR}$  (400 MHz,  $\text{CDCl}_3$ )  $\delta$  8.27 (s, 1H), 7.83 (d,  $J = 8.3$  Hz, 1H), 7.71 (d,  $J = 7.0$  Hz, 1H), 7.51 (d,  $J = 8.0$  Hz, 1H), 7.48 – 7.42 (m, 2H), 7.41 – 7.32 (m, 6H), 7.10 (s, 1H), 6.47 (s, 1H), 6.14 (s, 1H), 3.57 – 3.52 (m, 1H), 3.36 – 3.28 (m, 1H), 2.66 – 2.58 (m, 1H), 2.26 – 2.22 (m, 1H), 1.40 (s, 9H) ppm;

$^{13}\text{C NMR}$  (100 MHz,  $\text{CDCl}_3$ )  $\delta$  173.9, 171.0, 167.7, 154.6, 139.6, 137.6, 135.4, 135.0, 134.4, 131.9, 129.0, 128.9, 128.5, 128.3, 126.8, 125.9, 124.8, 122.2, 64.3, 60.9, 52.1, 42.8, 40.0, 28.6;

**HRMS (ESI)**  $m/z$  calcd for  $\text{C}_{29}\text{H}_{29}\text{ClN}_3\text{O}_2^+$  ( $\text{M}+\text{H}$ ) $^+$  486.1943, found  $m/z$  486.1949.

**2-(8-bromo-1-oxo-3,4-dihydrospiro[benzo[c]azepine-5,3'-indol]-2(1H)-yl)-N-(tert-butyl)-2-phenylacetamide ( $\pm$ )-19**

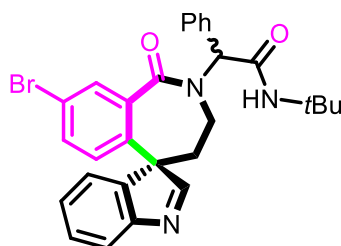

**19** crude  $^1\text{H}$  NMR

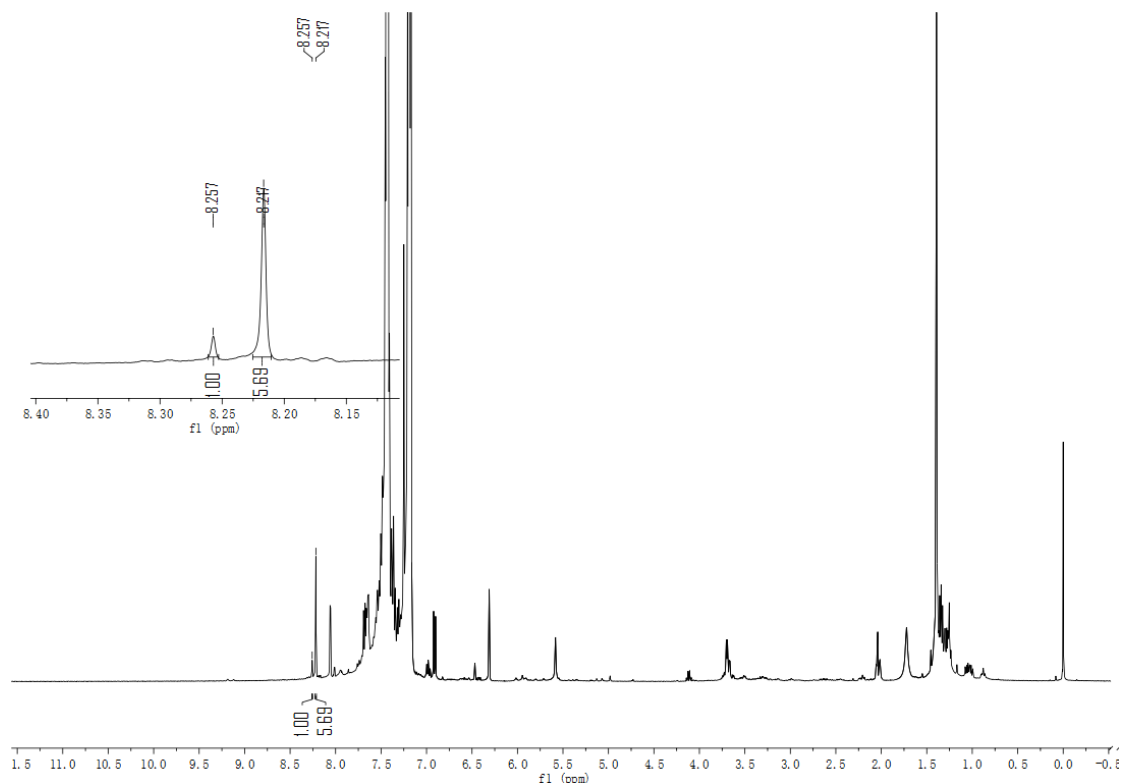

**dr = 19down/19up = 6/1**

White solid, **19down**, 39mg, 74% yield,  $R_f = 0.25$  (ethyl acetate/hexane = 30%);

$^1\text{H}$  NMR (400 MHz,  $\text{CDCl}_3$ )  $\delta$  8.21 (s, 1H), 8.06 – 8.05 (m, 1H), 7.65 (d,  $J = 6.9$  Hz, 1H), 7.50 (d,  $J = 6.9$  Hz, 2H), 7.43 – 7.35 (m, 6H), 7.34 – 7.29 (m, 1H), 6.93 – 6.90 (m, 1H), 6.30 (s, 1H), 5.57 (s, 1H), 3.70 – 3.63 (m, 2H), 2.05 – 2.02 (m, 1H), 1.40 (s, 9H), 1.08 – 1.00 (m, 1H) ppm;

$^{13}\text{C}$  NMR (100 MHz,  $\text{CDCl}_3$ )  $\delta$  173.5, 170.0, 168.4, 154.5, 139.7, 138.3, 134.8, 134.3, 133.9, 130.3, 129.8, 129.3, 129.2, 128.8, 127.3, 126.7, 124.9, 122.5, 122.2, 64.1, 61.3, 52.1, 43.1, 40.5, 28.7;

**HRMS (ESI)**  $m/z$  calcd for  $\text{C}_{29}\text{H}_{29}\text{BrN}_3\text{O}_2^+$  ( $\text{M}+\text{H}$ ) $^+$  530.1438, found  $m/z$  530.1444.

Yellow solid, **19up**, 5 mg, 10% yield,  $R_f = 0.5$  (ethyl acetate/hexane = 30%);

$^1\text{H}$  NMR (400 MHz,  $\text{CDCl}_3$ )  $\delta$  8.25 (s, 1H), 8.02 (d,  $J = 2.2$  Hz, 1H), 7.71 – 7.69 (m, 1H), 7.49 – 7.44 (m, 2H), 7.43 – 7.42 (m, 1H), 7.40 (d,  $J = 2.2$  Hz, 1H), 7.39 – 7.34 (m, 5H), 6.99 (d,  $J = 8.4$  Hz, 1H), 6.48 (s, 1H), 6.02 (s, 1H), 3.56 – 3.51 (m, 1H), 3.35 – 3.27 (m, 1H), 2.68 – 2.60 (m, 1H), 2.25 – 2.21 (m, 1H), 1.40 (s, 9H) ppm;

$^{13}\text{C}$  NMR (100 MHz,  $\text{CDCl}_3$ )  $\delta$  174.1, 170.3, 167.7, 154.7, 139.9, 138.3, 135.3, 134.3, 133.2, 131.4, 129.1, 128.8, 128.6, 128.5, 127.5, 126.5, 124.8, 122.3, 122.0, 64.1, 60.9, 52.2, 42.8, 39.8, 28.6;

**HRMS (ESI)**  $m/z$  calcd for  $\text{C}_{29}\text{H}_{29}\text{BrN}_3\text{O}_2^+$  ( $\text{M}+\text{H}$ ) $^+$  530.1438, found  $m/z$  530.1446.

***N*-(*tert*-butyl)-2-(7,8-difluoro-1-oxo-3,4-dihydrospiro[benzo[*c*]azepine-5,3'-indol]-2(1*H*)-yl)-2-phenyl acetamide ( $\pm$ )-**20****

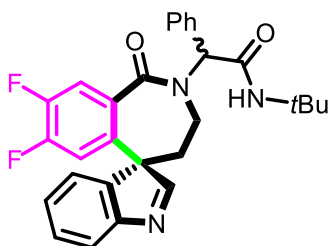

Yellow oil, **20down**, 37 mg, 76% yield, Rf = 0.25 (ethyl acetate/hexane = 30%);

**<sup>1</sup>H NMR** (400 MHz, CDCl<sub>3</sub>) δ 8.19 (s, 1H), 7.81 – 7.76 (m, 1H), 7.66 (d, *J* = 7.7 Hz, 1H), 7.49 (d, *J* = 7.4 Hz, 2H), 7.45 – 7.30 (m, 6H), 6.89 – 6.84 (m, 1H), 6.28 (s, 1H), 5.61 (s, 1H), 3.76 – 3.63 (m, 2H), 2.07 – 2.03 (m, 1H), 1.39 (s, 9H), 1.08 – 1.00 (m, 1H) ppm;

**<sup>13</sup>C NMR** (100 MHz, CDCl<sub>3</sub>) δ 173.1, 169.4, 168.4, 154.4, 139.6, 134.8, 129.8, 129.3, 129.1 (d, *J* = 16.8 Hz), 127.0, 124.6, 122.3, 121.9, 120.8 (d, *J* = 18.8 Hz), 119.2, 115.4 (d, *J* = 19.9 Hz), 63.8, 61.5, 52.1, 43.2, 40.5, 28.7 ppm;

**<sup>19</sup>F NMR** (376 MHz, CDCl<sub>3</sub>) δ -131.46 – -131.76 (m), -137.50 – -137.77 (m) ppm;

**HRMS (ESI)** *m/z* calcd for C<sub>29</sub>H<sub>28</sub>F<sub>2</sub>N<sub>3</sub>O<sub>2</sub><sup>+</sup> 488.2144, found *m/z* 488.2151.

**20up** is trace and not separated

**<sup>13</sup>C NMR** (101 MHz, CDCl<sub>3</sub>) δ 129.15 (d, *J* = 16.8 Hz), 120.82 (d, *J* = 18.8 Hz), 115.42 (d, *J* = 19.9 Hz).

*N*-(*tert*-butyl)-2-(1-oxo-7-(trifluoromethyl)-3,4-dihydrospiro[benzo[*c*]azepine-5,3'-indol]-2(1H)-yl)-2-phenylacetamide (±)-**21**

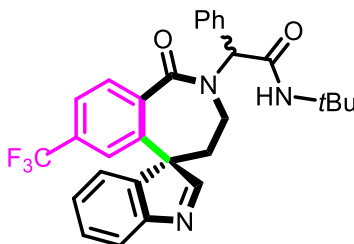

Yellow oil, **21down**, 43 mg, 82% yield, Rf = 0.3 (ethyl acetate/hexane = 30%);

**<sup>1</sup>H NMR** (400 MHz, CDCl<sub>3</sub>) δ 8.24 (s, 1H), 8.05 (d, *J* = 8.0 Hz, 1H), 7.67 (t, *J* = 6.0 Hz, 2H), 7.51 (d, *J* = 7.4 Hz, 2H), 7.47 – 7.36 (m, 5H), 7.33 (d, *J* = 8.2 Hz, 2H), 6.35 (s, 1H), 5.59 (s, 1H), 3.78 – 3.59 (m, 2H), 2.08 (dd, *J* = 14.3, 2.9 Hz, 1H), 1.40 (s, 9H), 1.06 (td, *J* = 13.7, 5.9 Hz, 1H) ppm;

**<sup>13</sup>C NMR** (100 MHz, CDCl<sub>3</sub>) δ 173.0, 170.2, 168.4, 154.4, 140.0, 139.2, 134.7, 133.1 (q, *J* = 32.7 Hz), 132.5, 131.7, 129.8, 129.4, 129.3, 129.0, 127.0, 125.2, 124.7, 122.4, 64.3, 61.2, 52.1, 43.0, 40.8, 28.7;

**<sup>19</sup>F NMR** (376 MHz, CDCl<sub>3</sub>) δ -63.01 (t, *J* = 5.7 Hz).

**HRMS (ESI)** *m/z* calcd for C<sub>30</sub>H<sub>29</sub>F<sub>3</sub>N<sub>3</sub>O<sub>2</sub><sup>+</sup> (M+H)<sup>+</sup> 520.2206, found *m/z* 520.2211.

**21up** is trace and not separated

*N*-(*tert*-butyl)-2-(7-nitro-1-oxo-3,4-dihydrospiro[benzo[*c*]azepine-5,3'-indol]-2(1H)-yl)-2-phenylacetamide (±)-**22**

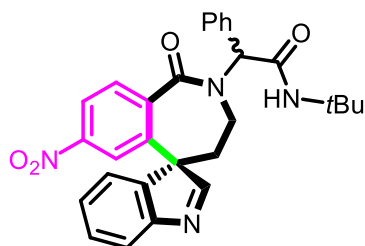

**22** crude  $^1\text{H}$  NMR

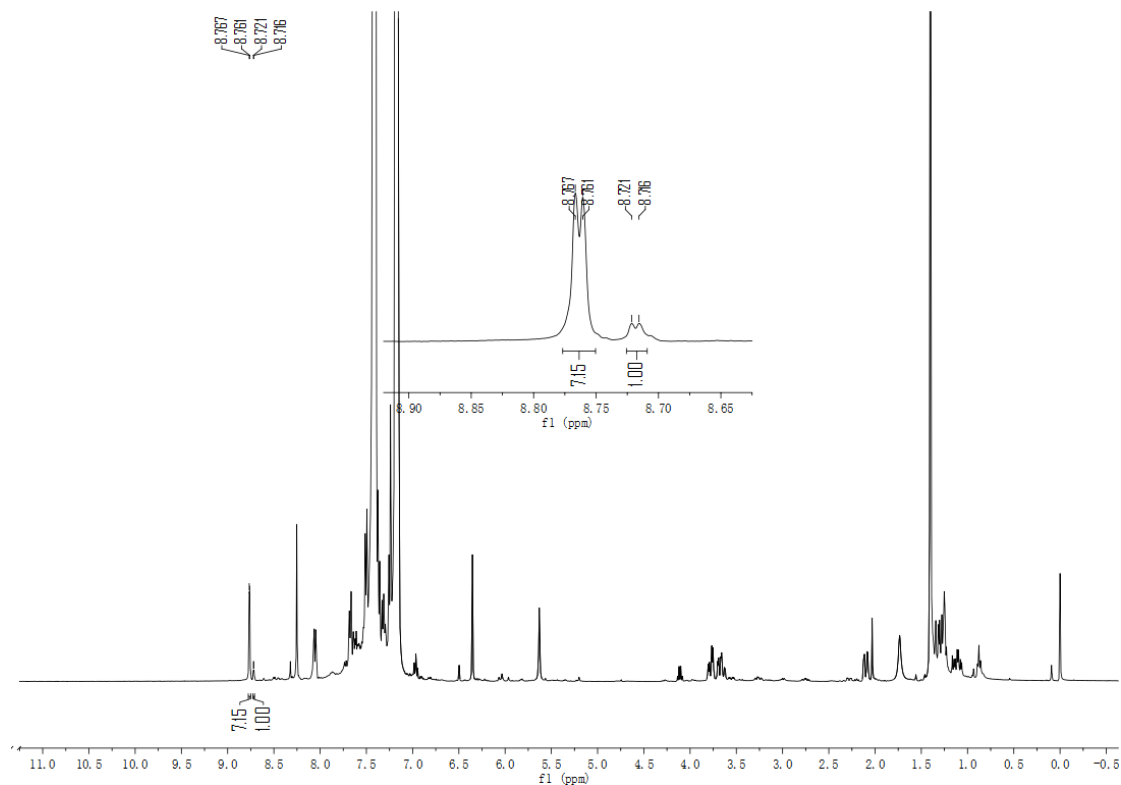

**dr = 22down/22up = 7/1**

Yellow solid, **22down**, 37 mg, 75% yield,  $R_f = 0.25$  (ethyl acetate/hexane = 30%);

$^1\text{H}$  NMR (400 MHz,  $\text{CDCl}_3$ )  $\delta$  8.78 (d,  $J = 1.5$  Hz, 1H), 8.24 (s, 1H), 8.11 (dd,  $J = 8.6, 1.4$  Hz, 1H), 7.68 (d,  $J = 7.1$  Hz, 1H), 7.51 – 7.44 (m, 5H), 7.39 (t,  $J = 7.8$  Hz, 2H), 7.35 – 7.32 (m, 1H), 7.28 (d,  $J = 6.5$  Hz, 1H), 6.34 (s, 1H), 5.61 (s, 1H), 3.80 – 3.61 (m, 2H), 2.13 – 2.09 (m, 1H), 1.41 (s, 9H), 1.15 – 1.06 (m, 1H) ppm;

$^{13}\text{C}$  NMR (100 MHz,  $\text{CDCl}_3$ )  $\delta$  172.3, 169.2, 168.2, 154.4, 147.8, 139.1, 138.4, 138.3, 134.6, 129.7, 129.4, 129.2, 127.0, 126.2, 125.8, 124.8, 122.5, 64.6, 61.4, 52.2, 43.1, 40.7, 28.7;

**HRMS (ESI)**  $m/z$  calcd for  $\text{C}_{29}\text{H}_{29}\text{N}_4\text{O}_4^+$  ( $\text{M}+\text{H}$ ) $^+$  497.2183, found  $m/z$  497.2189.

Yellow solid, **22up**, 5 mg, 11% yield,  $R_f = 0.5$  (ethyl acetate/hexane = 30%);

$^1\text{H}$  NMR (400 MHz,  $\text{CDCl}_3$ )  $\delta$  8.74 (d,  $J = 2.3$  Hz, 1H), 8.30 (s, 1H), 8.12 (dd,  $J = 8.6, 2.3$  Hz, 1H), 7.74 (d,  $J = 7.3$  Hz, 1H), 7.53 – 7.45 (m, 3H), 7.43 – 7.33 (m, 6H), 6.53 (s, 1H), 6.13 (s, 1H), 3.59 – 3.54 (m, 1H), 3.31 – 3.23 (m, 1H), 2.81 – 2.73 (m, 1H), 2.32 – 2.27 (m, 1H), 1.41 (s, 9H) ppm;

$^{13}\text{C}$  NMR (100 MHz,  $\text{CDCl}_3$ )  $\delta$  173.0, 169.5, 167.5, 154.7, 147.7, 139.5, 139.3, 138.2, 135.1, 129.2, 128.8, 128.6, 127.2, 126.9, 125.7, 125.6, 124.7, 122.5, 64.7, 61.1, 52.2, 42.7, 40.1, 28.6;

**HRMS (ESI)**  $m/z$  calcd for  $\text{C}_{29}\text{H}_{29}\text{N}_4\text{O}_4^+$  ( $\text{M}+\text{H}$ ) $^+$  497.2183, found  $m/z$  497.2183.

*N*-(*tert*-butyl)-2-(8'-oxo-5',6'-dihydrospiro[indole-3,4'-thieno[2,3-*c*]azepin]-7'(8'H)-yl)-2-phenylacetamide ( $\pm$ )-**23**

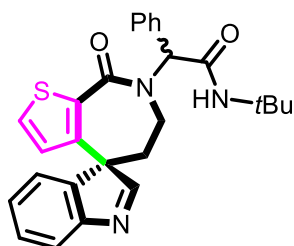

Yellow solid, **23down**, 39 mg, 86% yield,  $R_f = 0.3$  (ethyl acetate/hexane = 30%);

$^1\text{H NMR}$  (400 MHz,  $\text{CDCl}_3$ )  $\delta$  7.96 (s, 1H), 7.63 (d,  $J = 7.5$  Hz, 1H), 7.45 – 7.35 (m, 6H), 7.31 – 7.22 (m, 3H), 6.42 (s, 1H), 6.08 (d,  $J = 5.2$  Hz, 1H), 5.75 (s, 1H), 3.94 (dd,  $J = 15.1, 9.4$  Hz, 1H), 3.60 (dd,  $J = 15.2, 6.8$  Hz, 1H), 2.20 (dd,  $J = 15.1, 6.9$  Hz, 1H), 1.81 (dd,  $J = 14.7, 9.3$  Hz, 1H), 1.40 (s, 9H) ppm;

$^{13}\text{C NMR}$  (100 MHz,  $\text{CDCl}_3$ )  $\delta$  174.9, 168.6, 164.3, 154.5, 143.7, 138.0, 136.9, 135.6, 130.9, 129.2, 129.1, 128.7, 128.3, 127.2, 123.0, 121.6, 63.3, 61.8, 52.0, 43.1, 35.0, 28.7;

**HRMS (ESI)**  $m/z$  calcd for  $\text{C}_{23}\text{H}_{28}\text{NO}^+$  ( $\text{M}+\text{H}$ ) $^+$  458.1897, found  $m/z$  458.1899.

**23up** is trace and not separated

*N*-(*tert*-butyl)-2-(5'-methyl-1-oxo-3,4-dihydrospiro[benzo[*c*]azepine-5,3'-indol]-2(1H)-yl)-2-phenylacetamide ( $\pm$ )-**24**

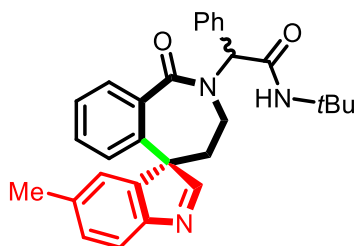

**24** crude  $^1\text{H NMR}$

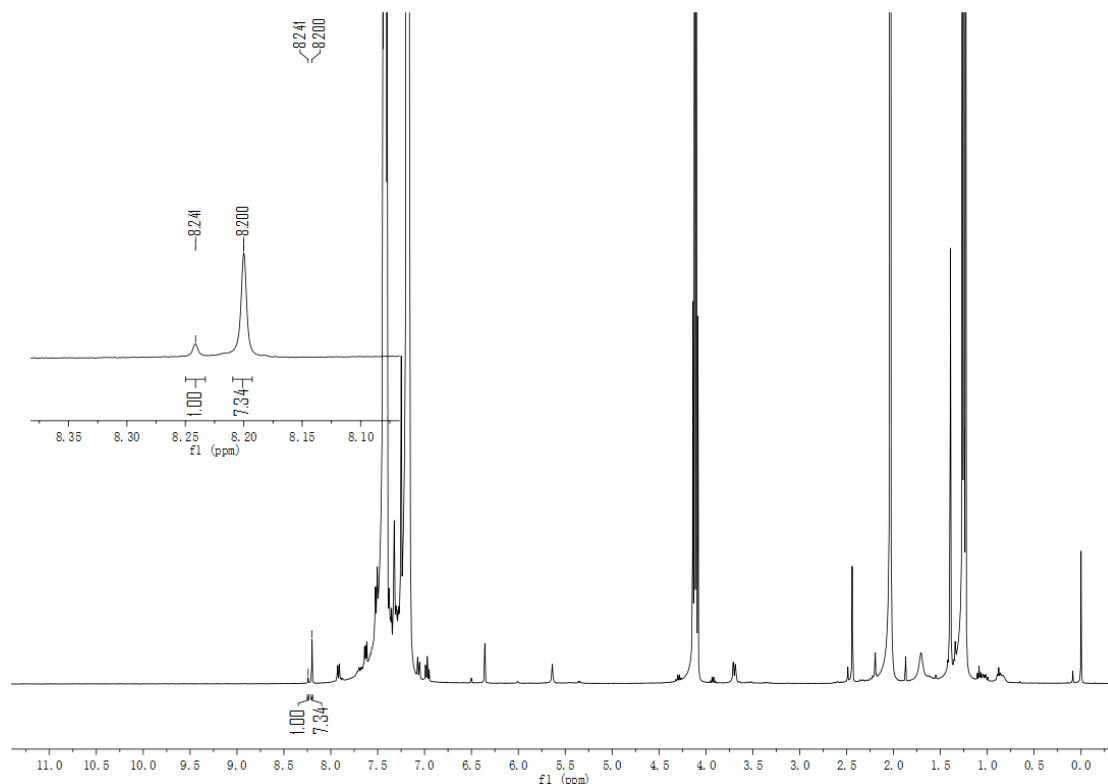

**dr = 24down/24up = 7/1**

Yellow solid, **24down**, 37 mg, 79% yield, R<sub>f</sub> = 0.3 (ethyl acetate/hexane = 30%);

**<sup>1</sup>H NMR** (400 MHz, CDCl<sub>3</sub>) δ 8.18 (s, 1H), 7.92 (d, *J* = 7.6 Hz, 1H), 7.52 (d, *J* = 7.8 Hz, 3H), 7.42 – 7.34 (m, 3H), 7.33 – 7.26 (m, 3H), 7.19 (d, *J* = 7.9 Hz, 1H), 7.06 (d, *J* = 7.8 Hz, 1H), 6.34 (s, 1H), 5.60 (s, 1H), 3.70 – 3.67 (m, 2H), 2.45 (s, 3H), 2.05 – 2.02 (m, 1H), 1.40 (s, 9H), 1.08 – 1.00 (m, 1H) ppm;

**<sup>13</sup>C NMR** (100 MHz, CDCl<sub>3</sub>) δ 173.2, 171.5, 168.7, 152.4, 140.2, 136.7, 136.4, 135.1, 131.5, 131.4, 131.0, 129.8, 129.2, 129.0, 128.3, 125.7, 125.6, 121.6, 64.4, 61.1, 52.0, 43.2, 41.0, 28.7, 21.6;

**HRMS (ESI)** *m/z* calcd for C<sub>30</sub>H<sub>32</sub>N<sub>3</sub>O<sub>2</sub><sup>+</sup> (M+H)<sup>+</sup> 466.2489, found *m/z* 466.2494.

Yellow solid, **24up**, 6 mg, 13% yield, R<sub>f</sub> = 0.5 (ethyl acetate/hexane = 30%);

**<sup>1</sup>H NMR** (400 MHz, CDCl<sub>3</sub>) δ 8.23 (s, 1H), 7.89 (dd, *J* = 7.6, 1.4 Hz, 1H), 7.57 (d, *J* = 7.9 Hz, 1H), 7.43 – 7.38 (m, 4H), 7.37 (s, 1H), 7.35 – 7.34 (m, 1H), 7.32 – 7.30 (m, 2H), 7.23 (dd, *J* = 7.9, 0.8 Hz, 1H), 7.14 (dd, *J* = 7.8, 0.9 Hz, 1H), 6.50 (s, 1H), 6.13 (s, 1H), 3.58 – 3.53 (m, 1H), 3.39 – 3.32 (m, 1H), 2.62 – 2.54 (m, 1H), 2.50 (s, 3H), 2.26 – 2.21 (m, 1H), 1.40 (s, 9H) ppm;

**<sup>13</sup>C NMR** (100 MHz, CDCl<sub>3</sub>) δ 173.8, 171.9, 167.9, 152.6, 140.4, 136.6, 136.3, 135.6, 132.5, 131.5, 130.3, 129.2, 128.9, 128.4, 128.3, 128.2, 125.8, 125.7, 121.6, 64.4, 60.6, 52.1, 42.9, 40.2, 28.6, 21.7;

**HRMS (ESI)** *m/z* calcd for C<sub>30</sub>H<sub>32</sub>N<sub>3</sub>O<sub>2</sub><sup>+</sup> (M+H)<sup>+</sup> 466.2489, found *m/z* 466.2496.

***N*-(*tert*-butyl)-2-(5'-methoxy-1-oxo-3,4-dihydrospiro[benzo[*c*]azepine-5,3'-indol]-2(1*H*)-yl)-2-phenyl acetamide (±)-25**

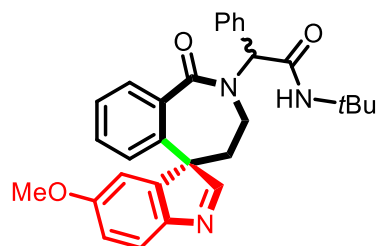

Yellow solid, **25up**, 37 mg, 78% yield,  $R_f = 0.3$  (ethyl acetate/hexane = 30%);

$^1\text{H NMR}$  (400 MHz,  $\text{CDCl}_3$ )  $\delta$  8.17 (s, 1H), 7.89 (d,  $J = 7.5$  Hz, 1H), 7.61 – 7.58 (m, 1H), 7.41 – 7.31 (m, 7H), 7.15 (d,  $J = 7.6$  Hz, 1H), 7.06 (s, 1H), 6.95 (d,  $J = 8.4$  Hz, 1H), 6.51 (s, 1H), 6.15 (s, 1H), 3.90 (s, 3H), 3.58 – 3.53 (m, 1H), 3.34 (dd,  $J = 19.2, 7.9$  Hz, 1H), 2.61 (td,  $J = 12.8, 4.2$  Hz, 1H), 2.21 – 2.18 (m, 1H), 1.40 (s, 9H) ppm;

$^{13}\text{C NMR}$  (100 MHz,  $\text{CDCl}_3$ )  $\delta$  172.8, 171.9, 167.9, 158.6, 148.4, 142.0, 136.6, 135.6, 132.4, 131.5, 130.4, 128.9, 128.4, 128.3, 128.2, 125.7, 122.4, 112.9, 111.8, 64.7, 60.6, 55.9, 52.1, 42.8, 40.4, 28.6;

**HRMS (ESI)**  $m/z$  calcd for  $\text{C}_{30}\text{H}_{32}\text{N}_3\text{O}_3^+$  ( $\text{M}+\text{H}$ ) $^+$  482.2438, found  $m/z$  482.2455.

**25down** is trace and not separated

*N*-(*tert*-butyl)-2-(7'-methyl-1-oxo-3,4-dihydrospiro[benzo[*c*]azepine-5,3'-indol]-2(1*H*)-yl)-2-phenylacetamide ( $\pm$ )-**26**

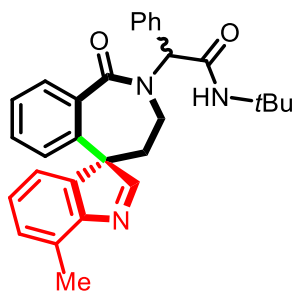

**26** crude  $^1\text{H NMR}$

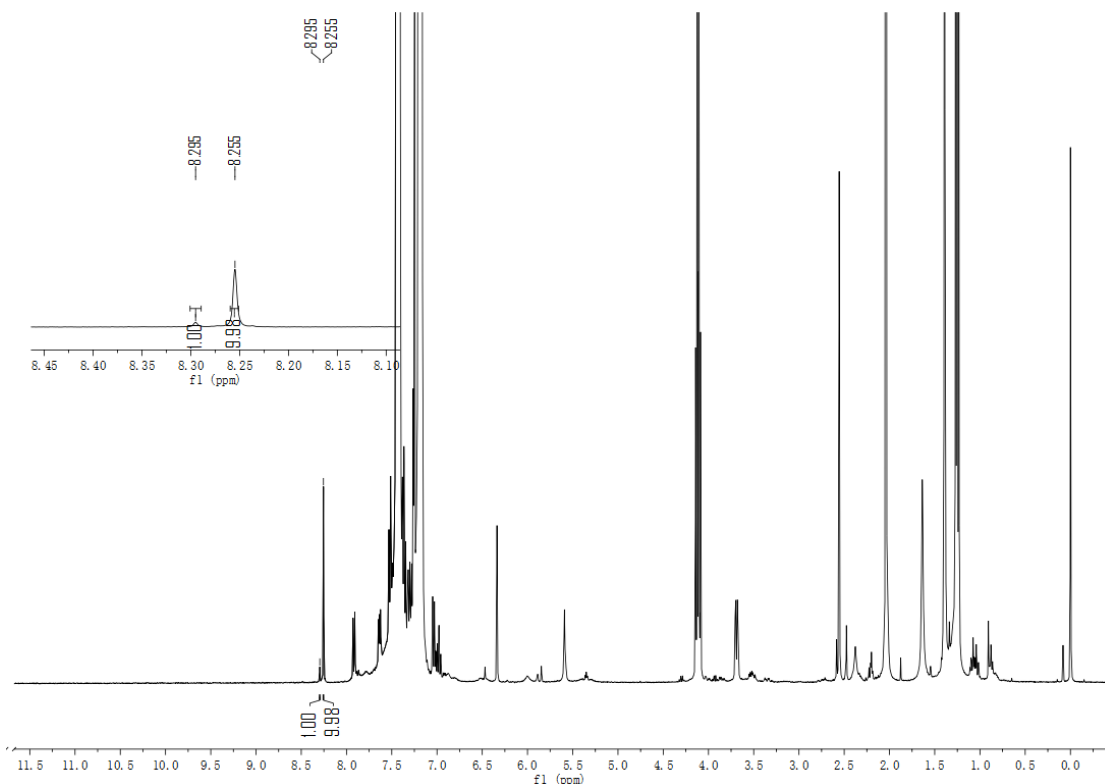

**dr = 26down/26up = 10/1**

White solid, **26down**, 37 mg, 80% yield, R<sub>f</sub> = 0.25 (ethyl acetate/hexane = 30%);

**<sup>1</sup>H NMR** (400 MHz, CDCl<sub>3</sub>) δ 8.24 (s, 1H), 7.92 (d, *J* = 7.5 Hz, 1H), 7.53 – 7.43 (m, 4H), 7.41 – 7.29 (m, 5H), 7.24 – 7.19 (m, 1H), 7.04 (d, *J* = 7.9 Hz, 1H), 6.33 (s, 1H), 5.60 (s, 1H), 3.69 – 3.67 (m, 2H), 2.56 (s, 3H), 2.06 – 2.02 (m, 1H), 1.39 (s, 9H), 1.10 – 1.02 (m, 1H) ppm;

**<sup>13</sup>C NMR** (100 MHz, CDCl<sub>3</sub>) δ 173.0, 171.5, 168.7, 153.0, 140.0, 136.7, 135.1, 131.9, 131.6, 131.4, 131.0, 129.9, 129.2, 129.0, 128.3, 126.3, 125.6, 122.5, 64.7, 61.2, 51.9, 43.2, 40.7, 28.7, 16.9;

**HRMS (ESI)** *m/z* calcd for C<sub>30</sub>H<sub>32</sub>N<sub>3</sub>O<sub>2</sub><sup>+</sup> (M+H)<sup>+</sup> 466.2489, found *m/z* 466.2495.

Yellow solid, **26up**, 4 mg, 8% yield, R<sub>f</sub> = 0.5 (ethyl acetate/hexane = 30%);

**<sup>1</sup>H NMR** (400 MHz, CDCl<sub>3</sub>) δ 8.28 (s, 1H), 7.87 (d, *J* = 7.6 Hz, 1H), 7.41 – 7.33 (m, 6H), 7.32 – 7.26 (m, 3H), 7.23 (d, *J* = 7.3 Hz, 1H), 7.12 (d, *J* = 7.8 Hz, 1H), 6.47 (s, 1H), 5.96 (s, 1H), 3.54 – 3.49 (m, 1H), 3.38 – 3.30 (m, 1H), 2.62 – 2.54 (m, 1H), 2.59 (s, 3H), 2.23 – 2.20 (m, 1H), 1.40 (s, 9H) ppm;

**<sup>13</sup>C NMR** (100 MHz, CDCl<sub>3</sub>) δ 173.6, 171.9, 167.9, 153.3, 140.3, 136.6, 135.7, 132.7, 131.8, 131.4, 130.4, 129.9, 129.0, 128.5, 128.4, 128.1, 128.11 (s), 126.2, 125.8, 122.4, 64.8, 60.8, 52.1, 42.9, 40.1, 28.6, 17.;

**HRMS (ESI)** *m/z* calcd for C<sub>30</sub>H<sub>32</sub>N<sub>3</sub>O<sub>2</sub><sup>+</sup> (M+H)<sup>+</sup> 466.2489, found *m/z* 466.2491.

***N*-(*tert*-butyl)-2-(6'-fluoro-1-oxo-3,4-dihydrospiro[benzo[*c*]azepine-5,3'-indol]-2(1*H*)-yl)-2-phenylacetamide (±)-27**



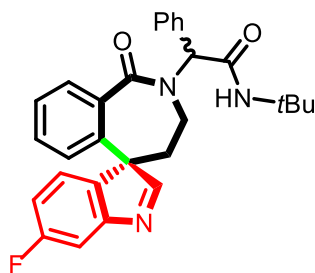

Yellow solid, **27down**, 39 mg, 84% yield, Rf = 0.25 (ethyl acetate/hexane = 30%);

**<sup>1</sup>H NMR** (400 MHz, CDCl<sub>3</sub>) δ 8.31 (s, 1H), 7.93 (dd, *J* = 7.7, 1.3 Hz, 1H), 7.51 (d, *J* = 7.1 Hz, 2H), 7.43 – 7.37 (m, 3H), 7.37 – 7.28 (m, 4H), 7.10 – 7.05 (m, 1H), 7.02 – 7.00 (m, 1H), 6.34 (s, 1H), 5.62 (s, 1H), 3.71 – 3.67 (m, 2H), 2.06 – 2.01 (m, 1H), 1.39 (s, 9H), 1.08 – 1.00 (m, 1H) ppm;

**<sup>13</sup>C NMR** (100 MHz, CDCl<sub>3</sub>) δ 176.1, 171.4, 168.6, 163.1 (d, *J* = 246.0 Hz), 155.98 (d, *J* = 10.9 Hz), 136.6, 135.60 (d, *J* = 2.9 Hz), 135.1, 131.6, 131.2, 130.9, 129.8, 129.3, 129.1, 128.5, 125.6, 125.4, 113.3 (d, *J* = 23.3 Hz), 109.7 (d, *J* = 23.8 Hz), 64.2, 61.1, 52.0, 43.1, 40.7, 28.7 ppm;

**<sup>19</sup>F NMR** (376 MHz, CDCl<sub>3</sub>) δ -113.21 – -113.27 (m)

**HRMS (ESI)** *m/z* calcd for C<sub>29</sub>H<sub>29</sub>FN<sub>3</sub>O<sub>2</sub><sup>+</sup> (M+H)<sup>+</sup> 470.2238, found *m/z* 470.2244.

**27up** is trace and not separated

*N*-(*tert*-butyl)-2-(6'-chloro-1-oxo-3,4-dihydrospiro[benzo[*c*]azepine-5,3'-indol]-2(1*H*)-yl)-2-phenylacetamide (±)-**28**

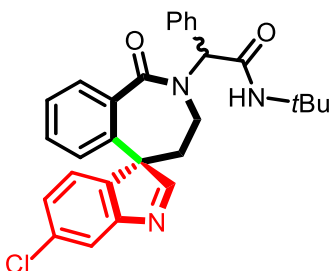

**28** crude <sup>1</sup>H NMR

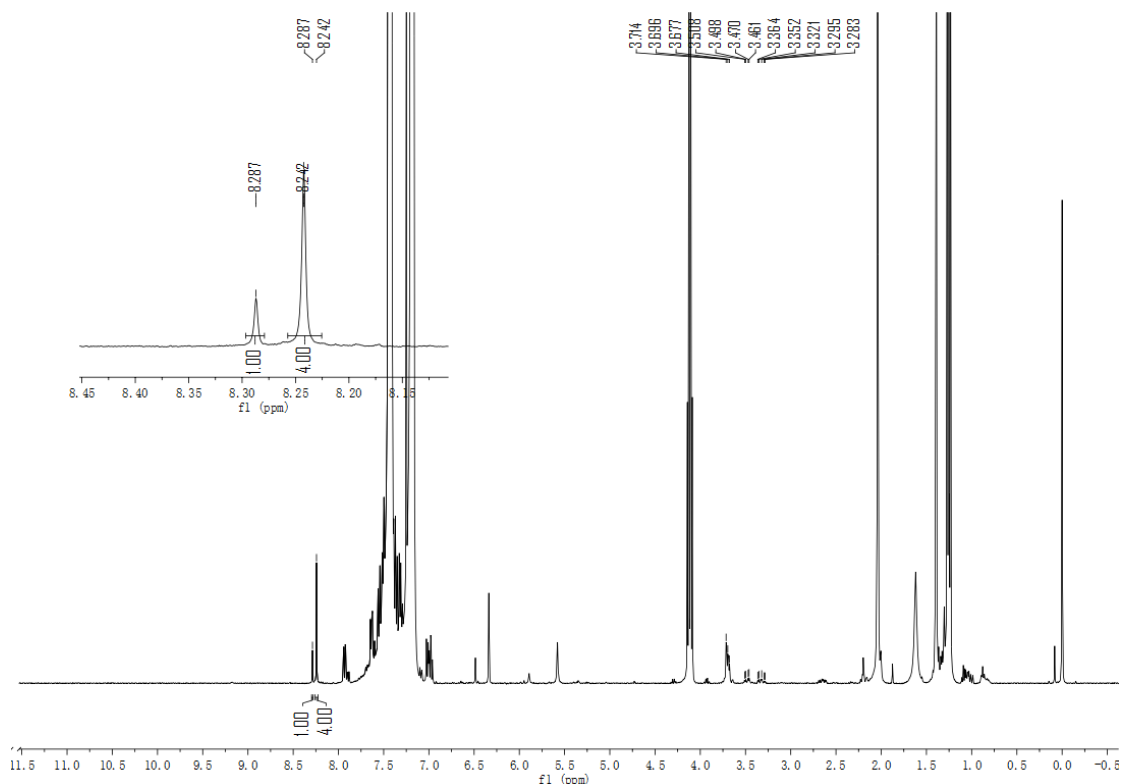

**dr = 28down/28up = 4/1**

Yellow solid, **28down**, 34 mg, 71% yield, Rf = 0.25 (ethyl acetate/hexane = 30%);

**<sup>1</sup>H NMR** (400 MHz, CDCl<sub>3</sub>) δ 8.23 (d, *J* = 2.5 Hz, 1H), 7.93 (d, *J* = 7.3 Hz, 1H), 7.58 – 7.47 (m, 3H), 7.45 – 7.29 (m, 7H), 7.02 (d, *J* = 7.7 Hz, 1H), 6.34 (s, 1H), 5.66 (s, 1H), 3.78 – 3.56 (m, 2H), 2.08 – 2.01 (m, 1H), 1.39 (s, 9H), 1.10 – 0.99 (m, 1H) ppm;

**<sup>13</sup>C NMR** (100 MHz, CDCl<sub>3</sub>) δ 174.5, 171.3, 168.6, 153.1, 142.0, 136.6, 135.1, 132.4, 131.6, 131.3, 130.5, 129.8, 129.3, 129.1, 128.8, 128.6, 125.5, 125.4, 122.9, 64.9, 61.1, 52.0, 43.1, 40.7, 28.7;

**HRMS (ESI)** *m/z* calcd for C<sub>29</sub>H<sub>29</sub>ClN<sub>3</sub>O<sub>2</sub><sup>+</sup> (M+H)<sup>+</sup> 486.1943, found *m/z* 486.1949.

Yellow solid, **28up**, 7 mg, 14% yield, Rf = 0.5 (ethyl acetate/hexane = 30%);

**<sup>1</sup>H NMR** (400 MHz, CDCl<sub>3</sub>) δ 8.29 (s, 1H), 7.89 (d, *J* = 7.6 Hz, 1H), 7.61 (d, *J* = 8.3 Hz, 1H), 7.50 (s, 1H), 7.44 – 7.39 (m, 5H), 7.38 – 7.33 (m, 3H), 7.09 (d, *J* = 7.8 Hz, 1H), 6.51 (s, 1H), 6.05 (s, 1H), 3.50 (dd, *J* = 14.9, 4.7 Hz, 1H), 3.40 – 3.28 (m, 1H), 2.65 (td, *J* = 13.3, 5.6 Hz, 1H), 2.21 – 2.17 (m, 1H), 1.40 (s, 9H) ppm;

**<sup>13</sup>C NMR** (100 MHz, CDCl<sub>3</sub>) δ 175.1, 171.6, 167.9, 153.4, 142.3, 136.6, 135.5, 132.2, 131.6, 130.6, 129.0, 128.8, 128.6, 128.5, 125.5, 125.4, 122.9, 65.0, 60.9, 52.1, 42.7, 40.0, 28.6;

**HRMS (ESI)** *m/z* calcd for C<sub>29</sub>H<sub>29</sub>ClN<sub>3</sub>O<sub>2</sub><sup>+</sup> (M+H)<sup>+</sup> 486.1943, found *m/z* 486.1947.

**2-(5'-bromo-1-oxo-3,4-dihydrospiro[benzo[*c*]azepine-5,3'-indol]-2(1*H*)-yl)-*N*-(*tert*-butyl)-2-phenylacetamide (±)-29**

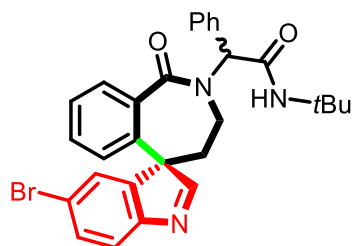

Yellow solid, **29down**, 43 mg, 81% yield,  $R_f = 0.25$  (ethyl acetate/hexane = 30%);

$^1\text{H NMR}$  (400 MHz,  $\text{CDCl}_3$ )  $\delta$  8.22 (s, 1H), 7.93 (dd,  $J = 7.7, 1.4$  Hz, 1H), 7.60 (d,  $J = 1.1$  Hz, 1H), 7.52 – 7.49 (m, 4H), 7.46 – 7.43 (m, 1H), 7.41 – 7.31 (m, 4H), 7.02 (dd,  $J = 7.8, 0.8$  Hz, 1H), 6.33 (s, 1H), 5.62 (s, 1H), 3.75 – 3.63 (m, 2H), 2.06 – 2.01 (m, 1H), 1.39 (s, 9H), 1.09 – 1.00 (m, 1H) ppm;

$^{13}\text{C NMR}$  (100 MHz,  $\text{CDCl}_3$ )  $\delta$  174.5, 171.3, 168.6, 153.5, 142.4, 136.6, 135.1, 131.8, 131.7, 131.3, 130.5, 129.8, 129.3, 129.1, 128.6, 128.3, 125.4, 123.4, 120.3, 65.0, 61.1, 52.0, 43.1, 40.7, 28.7;

**HRMS (ESI)**  $m/z$  calcd for  $\text{C}_{29}\text{H}_{29}\text{BrN}_3\text{O}_2^+$  ( $\text{M}+\text{H}$ ) $^+$  530.1438, found  $m/z$  530.1443.

**29up** is trace and not separated

*N*-butyl-2-(1-oxo-3,4-dihydrospiro[benzo[*c*]azepine-5,3'-indol]-2(1*H*)-yl)-2-phenylacetamide ( $\pm$ )-**30**

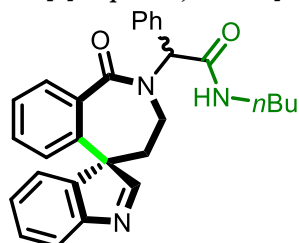

**30** crude  $^1\text{H NMR}$

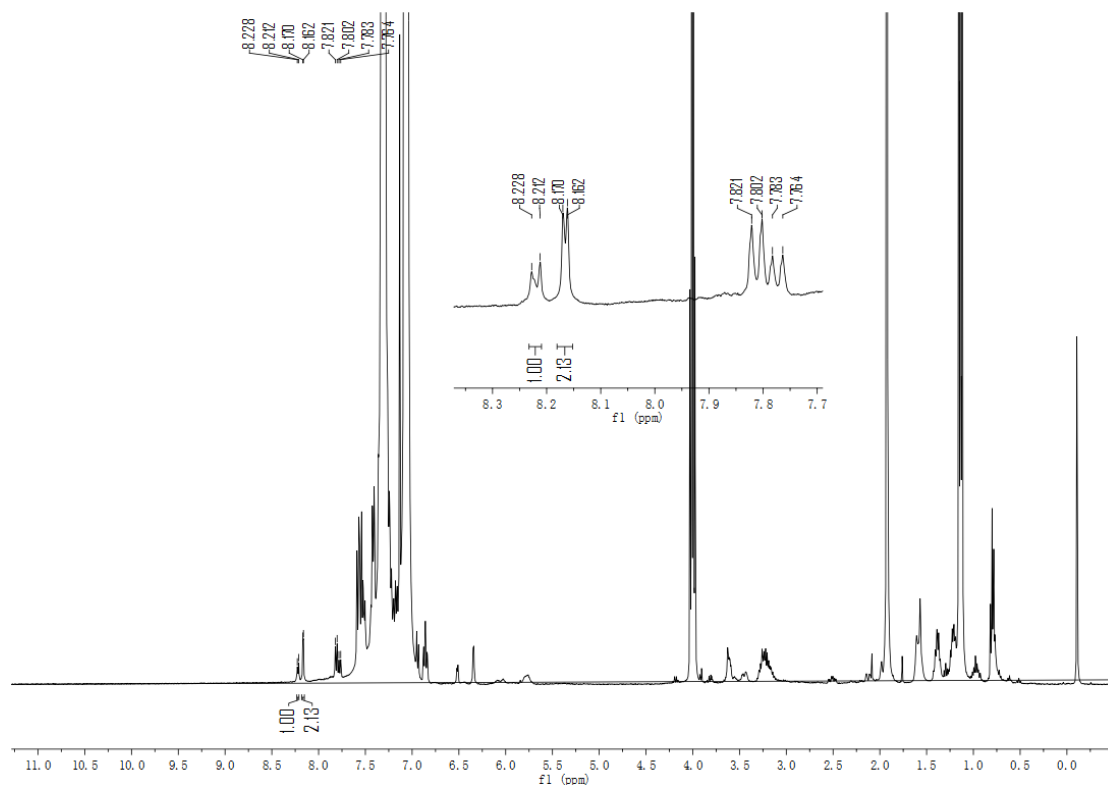

$dr = 30\text{down}/30\text{up} = 2/1$

Yellow solid, **30down**, 29 mg, 64% yield, Rf = 0.25 (ethyl acetate/hexane = 30%);

$^1\text{H NMR}$  (400 MHz,  $\text{CDCl}_3$ )  $\delta$  8.17 (s, 1H), 7.84 (dd,  $J = 7.7, 1.2$  Hz, 1H), 7.57 (d,  $J = 7.0$  Hz, 1H), 7.46 (d,  $J = 7.2$  Hz, 2H), 7.40 – 7.37 (m, 1H), 7.35 – 7.25 (m, 6H), 7.23 (d,  $J = 7.6$  Hz, 1H), 6.36 (s, 1H), 5.75 (s, 1H), 3.71 – 3.58 (m, 2H), 3.37 – 3.13 (m, 2H), 2.01 (dd,  $J = 13.3, 2.6$  Hz, 1H), 1.44 (dd,  $J = 15.0, 7.5$  Hz, 2H), 1.27 (dd,  $J = 14.9, 7.5$  Hz, 2H), 1.01 (ddd,  $J = 14.2, 11.8, 7.2$  Hz, 1H), 0.85 (t,  $J = 7.3$  Hz, 3H) ppm;

$^{13}\text{C NMR}$  (100 MHz,  $\text{CDCl}_3$ )  $\delta$  174.0, 171.5, 169.2, 154.6, 140.1, 136.6, 134.8, 131.5, 131.3, 131.1, 129.9, 129.2, 129.1, 128.6, 128.4, 126.4, 125.6, 125.0, 122.1, 64.5, 60.9, 43.1, 40.8, 39.6, 31.5, 20.0, 13.7 ppm;

**HRMS (ESI)**  $m/z$  calcd for  $\text{C}_{29}\text{H}_{30}\text{N}_3\text{O}_2^+$  (M+H) $^+$  452.2333, found  $m/z$  452.2341.

Yellow solid, **30up**, 11 mg, 24% yield, Rf = 0.5 (ethyl acetate/hexane = 30%);

$^1\text{H NMR}$  (400 MHz,  $\text{CDCl}_3$ )  $\delta$  8.21 (s, 1H), 7.81 (d,  $J = 6.8$  Hz, 1H), 7.62 (d,  $J = 7.2$  Hz, 1H), 7.44 (d,  $J = 7.1$  Hz, 1H), 7.32 (dt,  $J = 14.1, 7.5$  Hz, 8H), 7.24 (dd,  $J = 8.7, 5.3$  Hz, 1H), 7.05 (d,  $J = 7.7$  Hz, 1H), 6.53 (s, 1H), 3.48 (dd,  $J = 14.8, 3.9$  Hz, 1H), 3.38–3.16 (m, 3H), 2.62–2.47 (m, 1H), 2.21–2.10 (m, 1H), 1.49–1.40 (m, 2H), 1.27 (dd,  $J = 14.9, 7.5$  Hz, 2H), 0.84 (t,  $J = 7.3$  Hz, 3H) ppm;

$^{13}\text{C NMR}$  (100 MHz,  $\text{CDCl}_3$ )  $\delta$  174.6, 171.8, 168.5, 154.9, 140.4, 136.6, 135.4, 132.4, 131.5, 130.4, 129.0, 128.7, 128.7, 128.5, 128.2, 126.3, 125.7, 124.9, 122.1, 64.6, 60.6, 43.0, 40.0, 39.6, 31.5, 20.1, 13.7;

**HRMS (ESI)**  $m/z$  calcd for  $\text{C}_{29}\text{H}_{30}\text{N}_3\text{O}_2^+$  (M+H) $^+$  452.2333, found  $m/z$  452.2338.

**2-(1-oxo-3,4-dihydrospiro[benzo[c]azepine-5,3'-indol]-2(1H)-yl)-2-phenyl-N-(2,4,4-trimethylpentan-2-yl)acetamide ( $\pm$ )-31**

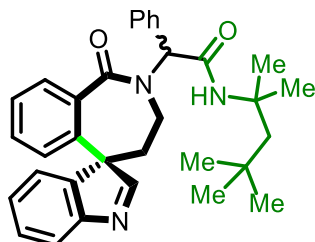

**31** crude  $^1\text{H NMR}$

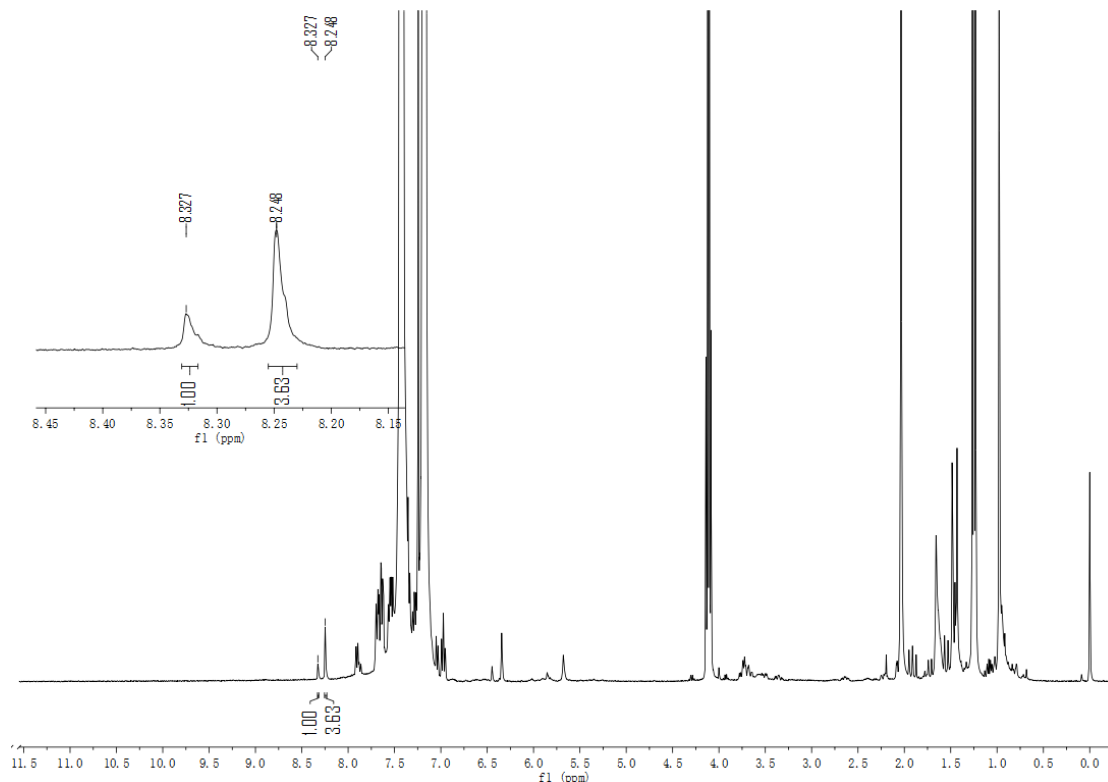

**dr = 31down/31up = 4/1**

White solid, **31down**, 40 mg, 79% yield, R<sub>f</sub> = 0.3 (ethyl acetate/hexane = 30%);

**<sup>1</sup>H NMR** (400 MHz, CDCl<sub>3</sub>) δ 8.15 (s, 1H), 7.82 (dd, *J* = 7.7, 1.2 Hz, 1H), 7.59 – 7.54 (m, 1H), 7.48 (d, *J* = 7.2 Hz, 2H), 7.41 – 7.36 (m, 1H), 7.34 – 7.26 (m, 5H), 7.22 (dd, *J* = 10.7, 4.2 Hz, 2H), 6.97 (d, *J* = 7.6 Hz, 1H), 6.26 (s, 1H), 5.63 (s, 1H), 3.76 – 3.41 (m, 2H), 1.99 (dd, *J* = 14.4, 3.0 Hz, 1H), 1.85 (d, *J* = 14.9 Hz, 1H), 1.48 (d, *J* = 14.9 Hz, 1H), 1.41 (s, 3H), 1.36 (s, 3H), 1.05 – 0.94 (m, 1H), 0.91 (s, 9H) ppm;

**<sup>13</sup>C NMR** (100 MHz, CDCl<sub>3</sub>) δ 174.1, 171.1, 168.2, 154.6, 140.1, 136.8, 134.9, 131.4, 131.3, 131.0, 130.0, 129.2, 129.0, 128.5, 128.3, 126.4, 125.6, 125.0, 122.0, 64.5, 61.2, 55.9, 52.4, 43.11, 40.7, 31.6, 31.5, 29.2, 28.5;

**HRMS (ESI)** *m/z* calcd for C<sub>33</sub>H<sub>38</sub>N<sub>3</sub>O<sub>2</sub><sup>+</sup> (M+H)<sup>+</sup> 508.2959, found *m/z* 508.2966.

White solid, **31up**, 10 mg, 20% yield, R<sub>f</sub> = 0.5 (ethyl acetate/hexane = 30%);

**<sup>1</sup>H NMR** (400 MHz, CDCl<sub>3</sub>) δ 8.24 (s, 1H), 7.80 (dd, *J* = 7.6, 1.4 Hz, 1H), 7.65 – 7.61 (m, 1H), 7.44 (dd, *J* = 7.1, 1.1 Hz, 1H), 7.35 (ddd, *J* = 5.5, 4.9, 1.8 Hz, 4H), 7.32 – 7.27 (m, 4H), 7.25 – 7.19 (m, 1H), 7.04 (dd, *J* = 7.8, 0.8 Hz, 1H), 6.38 (s, 1H), 5.86 (s, 1H), 3.45 (ddd, *J* = 14.7, 5.4, 1.8 Hz, 1H), 3.36 – 3.21 (m, 1H), 2.56 (ddd, *J* = 14.1, 12.3, 5.5 Hz, 1H), 2.23 – 2.09 (m, 1H), 1.64 (s, 2H), 1.40 (s, 3H), 1.38 (s, 3H), 0.90 (s, 9H) ppm;

**<sup>13</sup>C NMR** (100 MHz, CDCl<sub>3</sub>) δ 174.8, 171.8, 167.6, 154.9, 140.5, 136.7, 135.5, 132.48, 131.4, 130.4, 129.0, 128.7, 128.5, 128.5, 128.2, 126.2, 125.7, 124.9, 122.1, 64.6, 61.5, 56.1, 52.5, 43.0, 40.0, 31.6, 31.5, 28.8, 28.4 ppm;

**HRMS (ESI)** *m/z* calcd for C<sub>33</sub>H<sub>38</sub>N<sub>3</sub>O<sub>2</sub><sup>+</sup> (M+H)<sup>+</sup> 508.2959, found *m/z* 508.2963.

***N*-cyclohexyl-2-(1-oxo-3,4-dihydrospiro[benzo[*c*]azepine-5,3'-indol]-2(1*H*)-yl)-2-phenylacetamide**  
(±)-**32**

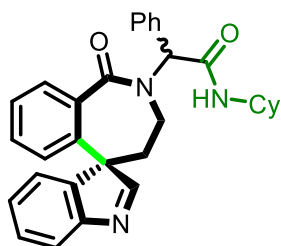

**32** crude  $^1\text{H}$  NMR

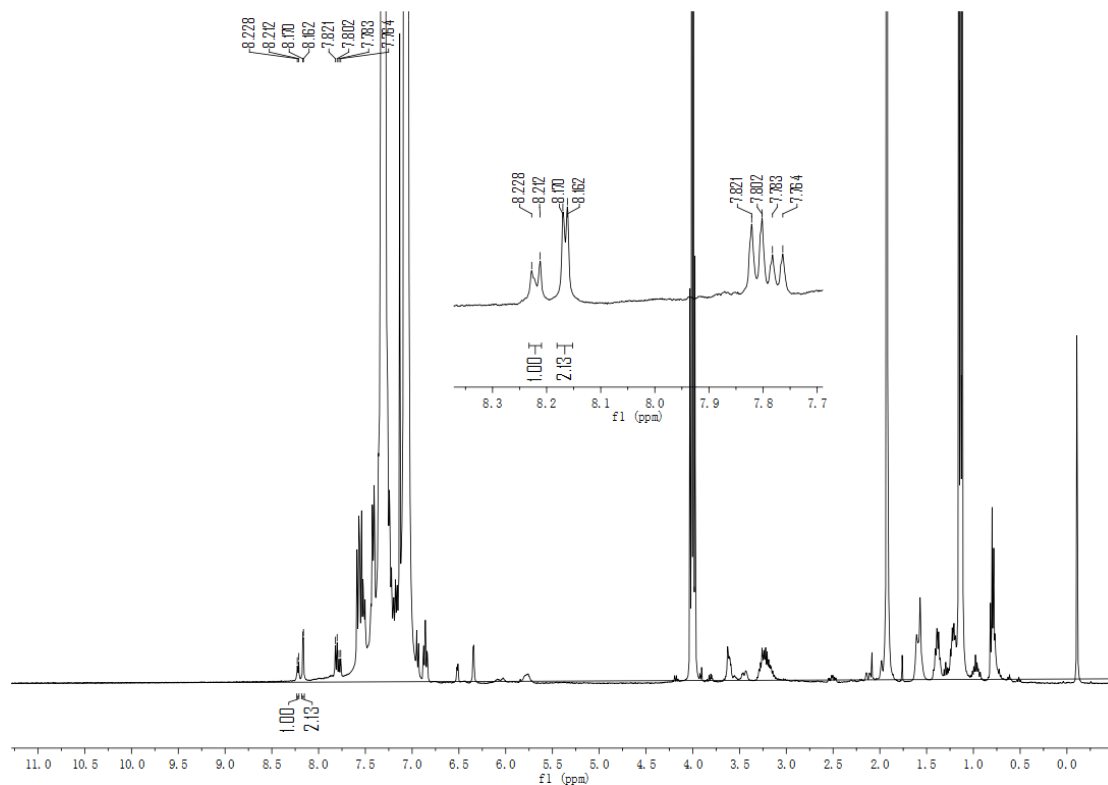

**dr = 32down/32up = 2/1**

Yellow solid, **32down**, 26 mg, 54% yield,  $R_f = 0.3$  (ethyl acetate/hexane = 30%);

$^1\text{H}$  NMR (400 MHz,  $\text{CDCl}_3$ )  $\delta$  8.23 (s, 1H), 7.81 (dd,  $J = 7.6, 1.2$  Hz, 1H), 7.65 – 7.58 (m, 1H), 7.46 – 7.42 (m, 1H), 7.37 – 7.26 (m, 7H), 7.24 (d,  $J = 7.7$  Hz, 2H), 7.05 (d,  $J = 7.7$  Hz, 1H), 6.56 (s, 1H), 6.16 (d,  $J = 7.9$  Hz, 1H), 3.83 – 3.70 (m, 1H), 3.50 (dd,  $J = 14.9, 4.1$  Hz, 1H), 3.36 – 3.23 (m, 1H), 2.64 – 2.50 (m, 1H), 2.18 (dd,  $J = 14.2, 2.5$  Hz, 1H), 1.94 – 1.81 (m, 2H), 1.69 – 1.56 (m, 2H), 1.51 (dd,  $J = 9.1, 3.7$  Hz, 2H), 1.29 – 1.23 (m, 2H), 1.08 (ddd,  $J = 12.5, 10.5, 3.2$  Hz, 2H) ppm;

$^{13}\text{C}$  NMR (100 MHz,  $\text{CDCl}_3$ )  $\delta$  174.6, 171.9, 167.6, 154.8, 140.3, 136.6, 135.6, 132.4, 131.5, 130.4, 128.9, 128.8, 128.6, 128.4, 128.2, 126.3, 125.7, 124.9, 122.1, 64.6, 60.4, 48.8, 43.0, 40.0, 32.9, 32.8, 25.4, 24.8, 24.8 ppm;

**HRMS (ESI)**  $m/z$  calcd for  $\text{C}_{31}\text{H}_{32}\text{N}_3\text{O}_2^+$  ( $\text{M}+\text{H}$ ) $^+$  478.2489, found  $m/z$  478.2492.

Yellow solid, **32up**, 13 mg, 27% yield,  $R_f = 0.5$  (ethyl acetate/hexane = 30%);

$^1\text{H}$  NMR (400 MHz,  $\text{CDCl}_3$ )  $\delta$  8.18 (s, 1H), 7.84 (d,  $J = 6.8$  Hz, 1H), 7.57 (d,  $J = 7.0$  Hz, 1H), 7.45 (d,  $J = 7.2$  Hz, 2H), 7.38 (d,  $J = 7.9$  Hz, 1H), 7.30 (td,  $J = 15.7, 7.7$  Hz, 6H), 7.22 (d,  $J = 7.2$  Hz, 1H), 6.98 (d,  $J = 7.7$  Hz, 1H), 6.35 (s, 1H), 5.62 (d,  $J = 7.8$  Hz, 1H), 3.79 (dd,  $J = 7.3, 3.5$  Hz, 1H), 3.63 (dd,  $J = 10.4, 2.8$  Hz, 2H), 2.00 (d,  $J = 13.8$  Hz, 1H), 1.89 (s, 2H), 1.67 (s, 1H), 1.57 – 1.49 (m, 2H), 1.32 – 1.24 (m, 2H), 1.14 – 0.96 (m, 4H) ppm;

$^{13}\text{C}$  NMR (100 MHz,  $\text{CDCl}_3$ )  $\delta$  174.1, 171.5, 168.3, 154.6, 140.1, 136.7, 134.9, 131.5, 131.3, 131.0, 129.9, 129.2, 129.1, 128.6, 128.4, 126.4, 125.6, 125.0, 122.1, 64.5, 60.8, 48.8, 43.2, 40.7, 32.9, 25.5, 24.8, 24.7 ppm;

HRMS (ESI)  $m/z$  calcd for  $\text{C}_{31}\text{H}_{32}\text{N}_3\text{O}_2^+$  ( $\text{M}+\text{H}$ ) $^+$  478.2489, found  $m/z$  478.2495.

*N*-benzyl-2-(1-oxo-3,4-dihydrospiro[benzo[*c*]azepine-5,3'-indol]-2(1*H*)-yl)-2-phenylacetamide ( $\pm$ )-**33**

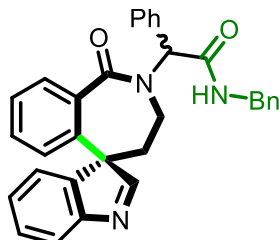

Yellow solid, **33**down, 27 mg, 56% yield,  $R_f = 0.25$  (ethyl acetate/hexane = 30%);

$^1\text{H}$  NMR (400 MHz,  $\text{CDCl}_3$ )  $\delta$  8.34 (s, 1H), 7.86 (d,  $J = 7.6$  Hz, 1H), 7.70 (d,  $J = 7.3$  Hz, 1H), 7.52 (d,  $J = 7.0$  Hz, 1H), 7.46 – 7.38 (m, 5H), 7.38 – 7.30 (m, 5H), 7.27 (d,  $J = 9.2$  Hz, 4H), 7.13 (d,  $J = 7.8$  Hz, 1H), 6.65 (s, 1H), 6.62 (s, 1H), 4.60 (dd,  $J = 14.7, 6.1$  Hz, 1H), 4.43 (dd,  $J = 14.7, 5.1$  Hz, 1H), 3.57 (dd,  $J = 14.9, 4.0$  Hz, 1H), 3.46 – 3.32 (m, 1H), 2.57 (td,  $J = 13.1, 5.5$  Hz, 1H), 2.24 – 2.21 (m, 1H) ppm;

$^{13}\text{C}$  NMR (100 MHz,  $\text{CDCl}_3$ )  $\delta$  174.7, 171.9, 168.6, 154.8, 140.4, 137.6, 136.5, 135.2, 132.4, 131.5, 130.5, 129.0, 128.8, 128.7, 128.6, 128.2, 127.9, 127.6, 126.3, 125.7, 124.9, 122.1, 64.5, 60.7, 43.9, 43.0, 40.0;

HRMS (ESI)  $m/z$  calcd for  $\text{C}_{32}\text{H}_{28}\text{N}_3\text{O}_2^+$  ( $\text{M}+\text{H}$ ) $^+$  486.2176, found  $m/z$  486.2180.

**33**up is trace and not separated

*N*-(naphthalen-2-yl)-2-(1-oxo-3,4-dihydrospiro[benzo[*c*]azepine-5,3'-indol]-2(1*H*)-yl)-2-phenylacetamide ( $\pm$ )-**34**

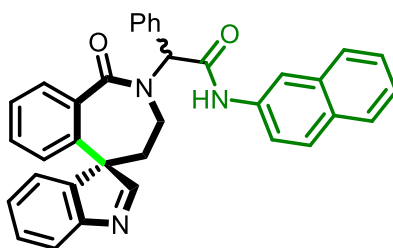

**34** crude  $^1\text{H}$  NMR

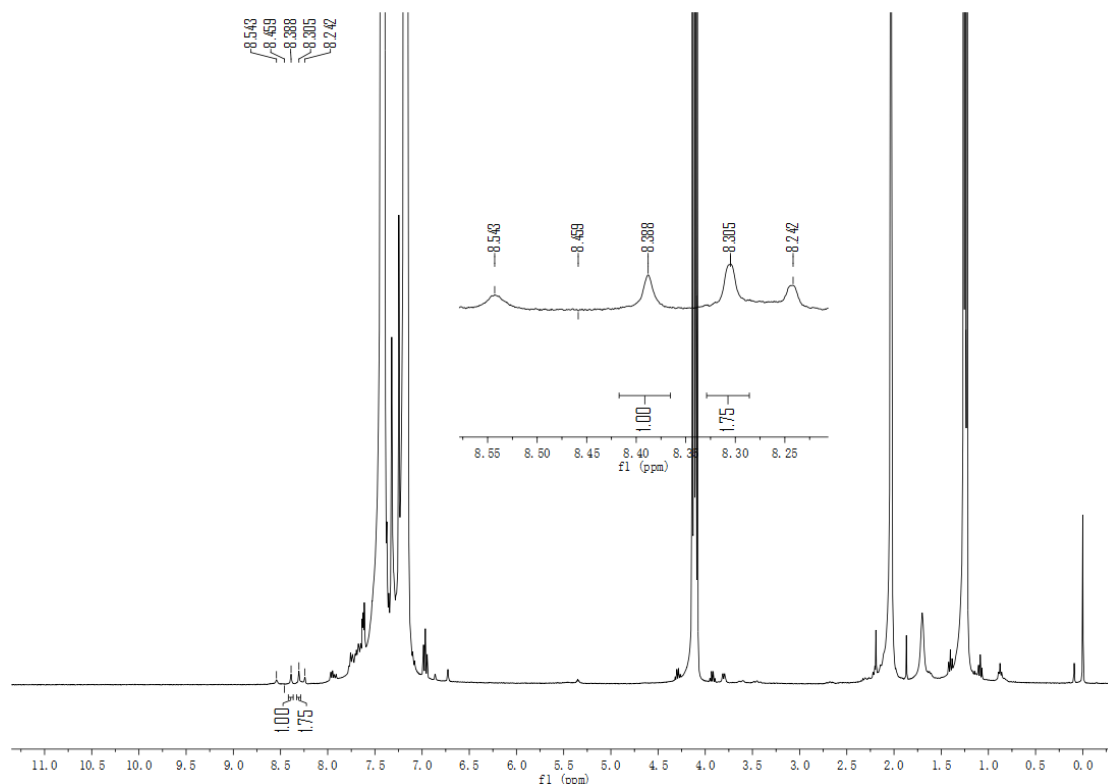

**dr = 34down/34up = 2/1**

White solid, **34down**, 11 mg, 21% yield, Rf = 0.25 (ethyl acetate/hexane = 30%);

**<sup>1</sup>H NMR** (400 MHz, CDCl<sub>3</sub>) δ 8.33 (s, 1H), 8.29 (s, 1H), 8.15 (s, 1H), 7.94 (d, *J* = 6.8 Hz, 1H), 7.76 (d, *J* = 8.3 Hz, 3H), 7.68 – 7.63 (m, 3H), 7.49 – 7.45 (m, 3H), 7.43 – 7.37 (m, 6H), 7.36 – 7.30 (m, 2H), 7.09 (d, *J* = 7.6 Hz, 1H), 6.72 (s, 1H), 3.81 – 3.79 (m, 2H), 2.15 – 2.11 (m, 1H), 1.18 – 1.12 (m, 1H) ppm;

**<sup>13</sup>C NMR** (100 MHz, CDCl<sub>3</sub>) δ 174.0, 171.9, 168.0, 154.4, 140.0, 136.4, 134.9, 134.0, 133.8, 131.8, 131.4, 131.2, 130.8, 130.1, 129.5, 128.8, 128.7, 128.5, 127.7, 127.6, 126.6, 125.7, 125.2, 125.1, 122.1, 119.8, 116.8, 64.5, 61.8, 43.2, 40.8;

**HRMS (ESI)** *m/z* calcd for C<sub>35</sub>H<sub>28</sub>N<sub>3</sub>O<sub>2</sub><sup>+</sup> (M+H)<sup>+</sup> 522.2176, found *m/z* 522.2179.

Yellow solid, **34up**, 8 mg, 15% yield, Rf = 0.5 (ethyl acetate/hexane = 30%);

**<sup>1</sup>H NMR** (400 MHz, CDCl<sub>3</sub>) δ 8.81 (s, 1H), 8.55 (s, 1H), 8.21 (s, 1H), 7.95 (d, *J* = 7.5 Hz, 1H), 7.71 – 7.65 (m, 4H), 7.55 – 7.49 (m, 3H), 7.44 – 7.30 (m, 12H), 7.14 (d, *J* = 7.7 Hz, 1H), 6.93 (s, 1H), 3.69 – 3.65 (m, 1H), 3.52 – 3.45 (m, 1H), 2.72 – 2.64 (m, 1H), 2.32 – 2.29 (d, *J* = 13.5 Hz, 1H) ppm;

**<sup>13</sup>C NMR** (100 MHz, CDCl<sub>3</sub>) δ 174.9, 172.2, 167.4, 154.6, 140.3, 136.4, 135.0, 134.9, 133.7, 132.5, 131.7, 130.8, 130.7, 129.2, 128.8, 128.6, 128.3, 127.7, 127.5, 126.4, 125.8, 125.0, 124.9, 122.1, 119.9, 117.1, 64.5, 61.9, 43.2, 40.0;

**HRMS (ESI)** *m/z* calcd for C<sub>35</sub>H<sub>28</sub>N<sub>3</sub>O<sub>2</sub><sup>+</sup> (M+H)<sup>+</sup> 522.2176, found *m/z* 522.2177.



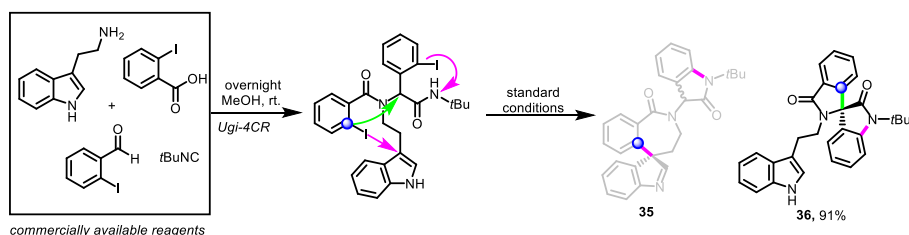

**2'-(2-(1H-indol-3-yl)ethyl)-1-(tert-butyl)spiro[indoline-3,1'-isoindoline]-2,3'-dione (36)**

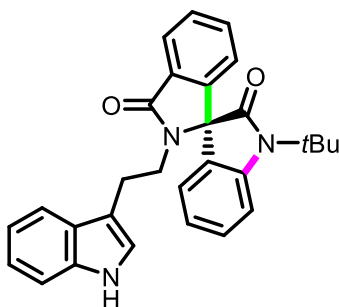

Yellow solid, **36**, 41 mg, 91% yield, Rf = 0.4 (ethyl acetate/hexane = 30%);

<sup>1</sup>H NMR (400 MHz, CDCl<sub>3</sub>) δ 7.99 (s, 1H), 7.86 (d, *J* = 6.8 Hz, 1H), 7.44 – 7.33 (m, 4H), 7.31 – 7.25 (m, 1H), 7.22 (d, *J* = 8.1 Hz, 1H), 7.06 (t, *J* = 7.0 Hz, 2H), 6.94 – 6.86 (m, 3H), 6.76 (dd, *J* = 7.4, 1.2 Hz, 1H), 3.66 – 3.23 (m, 2H), 3.10 – 2.48 (m, 2H), 1.72 (s, 9H) ppm;

<sup>13</sup>C NMR (100 MHz, CDCl<sub>3</sub>) δ 173.8, 169.7, 144.8, 144.5, 136.2, 132.2, 132.0, 130.0, 129.2, 127.2, 126.5, 125.0, 124.0, 123.0, 122.0, 121.8, 120.8, 119.1, 118.5, 114.0, 112.9, 111.1, 72.2, 58.7, 42.2, 29.2, 24.3;

**HRMS (ESI)** *m/z* calcd for C<sub>29</sub>H<sub>28</sub>N<sub>3</sub>O<sub>2</sub><sup>+</sup> (M+H)<sup>+</sup> 450.2176, found *m/z* 450.2179.

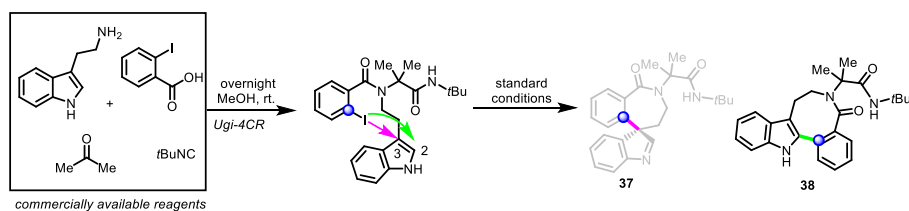

***N*-(tert-butyl)-2-methyl-2-(5-oxo-5,7,8,13-tetrahydro-6H-benzo[6,7]azocino[5,4-*b*]indol-6-yl)propanamide (38)**

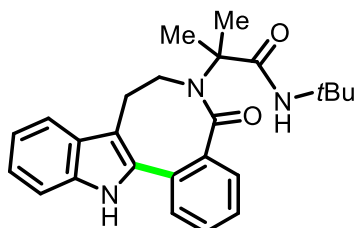

Yellow solid, **38**, 26 mg, 65% yield, Rf = 0.4 (ethyl acetate/hexane = 30%);

<sup>1</sup>H NMR (400 MHz, CDCl<sub>3</sub>) δ 8.27 (s, 1H), 7.68 – 7.64 (m, 1H), 7.58 (d, *J* = 7.8 Hz, 1H), 7.50 – 7.42

(m, 4H), 7.36 (d,  $J = 8.0$  Hz, 1H), 7.18 (t,  $J = 7.3$  Hz, 1H), 5.11 (s, 1H), 4.04 (td,  $J = 15.2, 4.4$  Hz, 1H), 3.76 (dd,  $J = 15.8, 5.4$  Hz, 1H), 3.48 – 3.35 (m, 1H), 2.98 (dd,  $J = 16.6, 4.0$  Hz, 1H), 1.58 (s, 3H), 1.57 (s, 3H), 0.73 (s, 9H) ppm;

$^{13}\text{C}$  NMR (100 MHz,  $\text{CDCl}_3$ )  $\delta$  173.5, 171.3, 137.2, 136.5, 132.4, 132.2, 132.1, 130.4, 129.9, 129.0, 128.9, 128.5, 123.2, 120.3, 118.1, 111.1, 108.0, 63.2, 50.0, 43.5, 29.7, 27.7, 26.8, 25.6, 22.2;

**HRMS (ESI)**  $m/z$  calcd for  $\text{C}_{25}\text{H}_{30}\text{N}_3\text{O}_2^+$  ( $\text{M}+\text{H}$ ) $^+$  404.2333, found  $m/z$  404.2339.

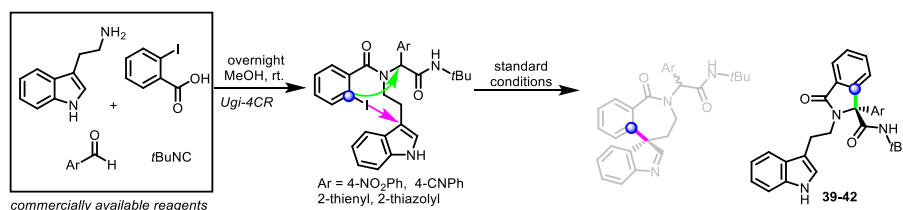

**2-(2-(1H-indol-3-yl)ethyl)-N-(tert-butyl)-1-(4-nitrophenyl)-3-oxoisindoline-1-carboxamide (39)**

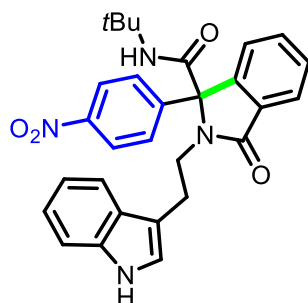

Yellow solid, **39**, 44 mg, 88% yield,  $R_f = 0.4$  (ethyl acetate/hexane = 30%);

$^1\text{H}$  NMR (400 MHz,  $\text{CDCl}_3$ )  $\delta$  8.10 (d,  $J = 8.7$  Hz, 3H), 7.96 – 7.94 (m, 1H), 7.63 – 7.58 (m, 2H), 7.50 (d,  $J = 7.6$  Hz, 2H), 7.29 (d,  $J = 8.8$  Hz, 3H), 7.15 (t,  $J = 7.5$  Hz, 1H), 7.08 (t,  $J = 7.4$  Hz, 1H), 6.99 (s, 1H), 5.91 (s, 1H), 3.78 – 3.65 (m, 2H), 3.05 – 2.98 (m, 1H), 2.73 – 2.65 (m, 1H), 1.19 (s, 9H) ppm;

$^{13}\text{C}$  NMR (100 MHz,  $\text{CDCl}_3$ )  $\delta$  169.5, 167.3, 147.6, 145.8, 145.0, 136.3, 133.3, 130.7, 129.9, 129.6, 127.1, 124.0, 123.6, 122.3, 121.9, 119.6, 118.7, 112.3, 111.2, 75.6, 52.2, 42.9, 28.2, 23.7;

**HRMS (ESI)**  $m/z$  calcd for  $\text{C}_{23}\text{H}_{28}\text{NO}^+$  ( $\text{M}+\text{H}$ ) $^+$  497.2183, found  $m/z$  497.2188.

**2-(2-(1H-indol-3-yl)ethyl)-N-(tert-butyl)-1-(4-cyanophenyl)-3-oxoisindoline-1-carboxamide (40)**

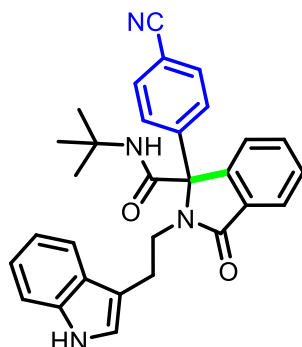

Yellow solid, **40**, 43 mg, 90% yield,  $R_f = 0.4$  (ethyl acetate/hexane = 30%);

$^1\text{H}$  NMR (400 MHz,  $\text{CDCl}_3$ )  $\delta$  8.17 (s, 1H), 7.95 – 7.93 (m, 1H), 7.63 – 7.58 (m, 4H), 7.53 – 7.49 (m, 2H), 7.32 (d,  $J = 8.0$  Hz, 1H), 7.27 (d,  $J = 7.1$  Hz, 2H), 7.18 (t,  $J = 7.5$  Hz, 1H), 7.11 (t,  $J = 7.4$  Hz, 1H), 7.01 (s, 1H), 5.92 (s, 1H), 3.75 – 3.62 (m, 2H), 3.06 – 2.98 (m, 1H), 2.62 – 2.54 (m, 1H), 1.17 (s, 9H)

ppm;

$^{13}\text{C}$  NMR (100 MHz,  $\text{CDCl}_3$ )  $\delta$  169.5, 167.4, 145.8, 143.2, 136.3, 133.2, 132.4, 130.8, 129.9, 129.4, 127.1, 123.9, 123.6, 122.3, 122.0, 119.6, 118.7, 118.3, 112.4, 112.3, 111.3, 75.8, 52.2, 42.9, 28.2, 23.8;

**HRMS (ESI)**  $m/z$  calcd for  $\text{C}_{30}\text{H}_{29}\text{N}_4\text{O}_2^+$  ( $\text{M}+\text{H}$ ) $^+$  477.2285, found  $m/z$  477.2288.

**2-(2-(1H-indol-3-yl)ethyl)-N-(tert-butyl)-3-oxo-1-(thiophen-2-yl)isoindoline-1-carboxamide (41)**

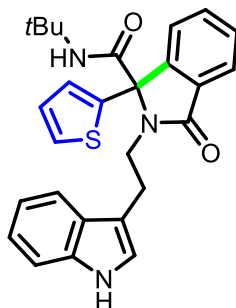

Yellow solid, **42**, 39 mg, 85% yield,  $R_f$  = 0.4 (ethyl acetate/hexane = 30%);

$^1\text{H}$  NMR (400 MHz,  $\text{DMSO-}d_6$ )  $\delta$  10.82 (s, 1H), 7.85 (d,  $J$  = 7.5 Hz, 1H), 7.79 (d,  $J$  = 7.3 Hz, 1H), 7.68 (t,  $J$  = 7.4 Hz, 1H), 7.63 – 7.59 (m, 2H), 7.45 (d,  $J$  = 7.8 Hz, 1H), 7.37 (s, 1H), 7.33 (d,  $J$  = 8.0 Hz, 1H), 7.12 (d,  $J$  = 3.2 Hz, 2H), 7.08 – 7.04 (m, 2H), 6.98 (t,  $J$  = 7.4 Hz, 1H), 3.73 (td,  $J$  = 13.5, 4.6 Hz, 1H), 2.88 (td,  $J$  = 13.0, 4.5 Hz, 1H), 2.06 (td,  $J$  = 12.8, 5.1 Hz, 1H), 1.22 (s, 9H) ppm;

$^{13}\text{C}$  NMR (100 MHz,  $\text{DMSO-}d_6$ )  $\delta$  167.9, 167.0, 146.8, 141.7, 136.7, 132.8, 131.3, 130.0, 129.2, 128.0, 127.5, 127.4, 123.8, 123.2, 123.0, 121.5, 118.8, 118.6, 111.9, 111.7, 73.5, 52.1, 43.1, 28.6, 23.7;

**HRMS (ESI)**  $m/z$  calcd for  $\text{C}_{27}\text{H}_{28}\text{N}_3\text{O}_2\text{S}^+$  ( $\text{M}+\text{H}$ ) $^+$  458.1897, found  $m/z$  458.1899.

**2-(2-(1H-indol-3-yl)ethyl)-N-(tert-butyl)-3-oxo-1-(thiazol-2-yl)isoindoline-1-carboxamide (42)**

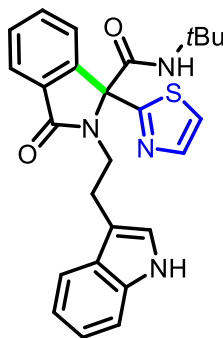

Yellow solid, **43**, 40 mg, 87% yield,  $R_f$  = 0.25 (ethyl acetate/hexane = 30%);

$^1\text{H}$  NMR (400 MHz,  $\text{CDCl}_3$ )  $\delta$  8.18 (s, 1H), 8.11 (s, 1H), 7.92 – 7.90 (m, 1H), 7.83 (d,  $J$  = 3.3 Hz, 1H), 7.69 (d,  $J$  = 7.8 Hz, 1H), 7.53 – 7.51 (m, 3H), 7.33 (t,  $J$  = 5.3 Hz, 2H), 7.17 (t,  $J$  = 7.4 Hz, 1H), 7.12 – 7.08 (m, 2H), 3.93 – 3.86 (m, 1H), 3.76 – 3.69 (m, 1H), 3.36 – 3.28 (m, 1H), 3.09 – 3.01 (m, 1H), 1.31 (s, 9H) ppm;

$^{13}\text{C}$  NMR (100 MHz,  $\text{CDCl}_3$ )  $\delta$  170.2, 168.0, 165.1, 145.8, 142.8, 136.3, 132.5, 130.6, 129.7, 127.4, 124.1, 122.1, 122.0, 120.8, 119.3, 119.1, 113.3, 111.1, 74.3, 52.1, 44.2, 28.4, 23.6;

**HRMS (ESI)**  $m/z$  calcd for  $\text{C}_{26}\text{H}_{27}\text{N}_4\text{O}_2\text{S}^+$  ( $\text{M}+\text{H}$ ) $^+$  459.1849, found  $m/z$  459.1854.

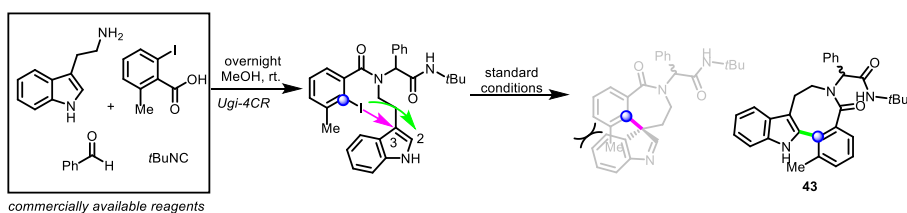

***N*-(*tert*-butyl)-2-(1-methyl-5-oxo-5,7,8,13-tetrahydro-6H-benzo[6,7]azocino[5,4-*b*]indol-6-yl)-2-phenylacetamide (**43**)**

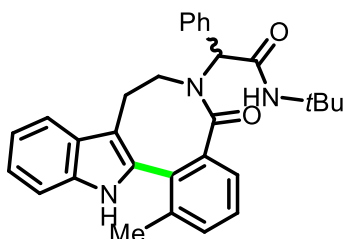

Yellow solid, **43**, 32 mg, 69% yield,  $R_f = 0.4$  (ethyl acetate/hexane = 30%);

$^1\text{H NMR}$  (400 MHz,  $\text{CDCl}_3$ )  $\delta$  8.18 (s, 1H), 7.40 – 7.35 (m, 3H), 7.33 – 7.27 (m, 5H), 7.23 (s, 1H), 7.11 (t,  $J = 7.0$  Hz, 2H), 7.03 – 7.00 (m, 1H), 6.32 (s, 1H), 5.88 (s, 1H), 3.85 – 3.76 (m, 1H), 3.42 – 3.29 (m, 2H), 2.90 – 2.86 (m, 1H), 2.17 (s, 3H), 1.06 (s, 9H) ppm;

$^{13}\text{C NMR}$  (100 MHz,  $\text{CDCl}_3$ )  $\delta$  173.6, 168.3, 138.4, 137.4, 135.6, 134.9, 131.8, 131.6, 131.5, 129.0, 128.7, 128.6, 128.1, 127.5, 124.8, 121.5, 119.7, 119.6, 110.8, 110.6, 62.4, 51.2, 44.2, 28.3, 27.9, 20.9;

**HRMS (ESI)**  $m/z$  calcd for  $\text{C}_{30}\text{H}_{32}\text{N}_3\text{O}_2^+$  ( $\text{M}+\text{H}$ ) $^+$  466.2489, found  $m/z$  466.2495.

#### 4. Investigation of Other Similar Substrates

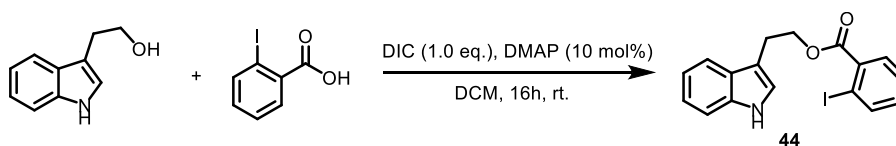

To a solution of chromohydrin (10 mmol, 1.61 g, 1.0 equiv.) and *o*-iodobenzoic acid (10 mmol, 2.48g, 1.0 eq.iv.) in DCM (30 mL) were added successively DIC (0 mmol, 1.6 mL, 1.0 equiv.) and DMAP (1 mmol, 126 mg, 0.1 equiv) in a screw capped vial equipped with a magnetic stir bar. The reaction mixture was stirred at room temperature for 16h. After completion of the reaction, the reaction mixture was concentrated under reduced pressure followed by column chromatography over silica gel using petroleum / EtOAc = 10/2~5/1 as eluent to afford the desired product **44** yellow solid, 3.3 g, 85% yield.

$^1\text{H NMR}$  (400 MHz,  $\text{CDCl}_3$ )  $\delta$  8.05 (s, 1H), 7.98 (d,  $J = 7.9$  Hz, 1H), 7.74 (dd,  $J = 7.8, 1.3$  Hz, 1H), 7.67 (d,  $J = 7.9$  Hz, 1H), 7.36 (dd,  $J = 7.3, 6.4$  Hz, 2H), 7.20 (t,  $J = 7.5$  Hz, 1H), 7.16 – 7.07 (m, 3H), 4.62 (t,  $J = 7.2$  Hz, 2H), 3.26 (t,  $J = 7.2$  Hz, 2H) ppm;

$^{13}\text{C NMR}$  (100 MHz,  $\text{CDCl}_3$ )  $\delta$  166.6, 141.3, 136.2, 135.3, 132.6, 131.0, 127.9, 127.5, 122.2, 122.2, 119.5, 118.8, 111.8, 111.2, 94.1, 65.7, 24.8 ppm;

**LCMS (ESI)**  $m/z$  calcd for  $\text{C}_{17}\text{H}_{15}\text{INO}_2^+$  ( $\text{M}+\text{H}$ ) $^+$  392, found  $m/z$  392.

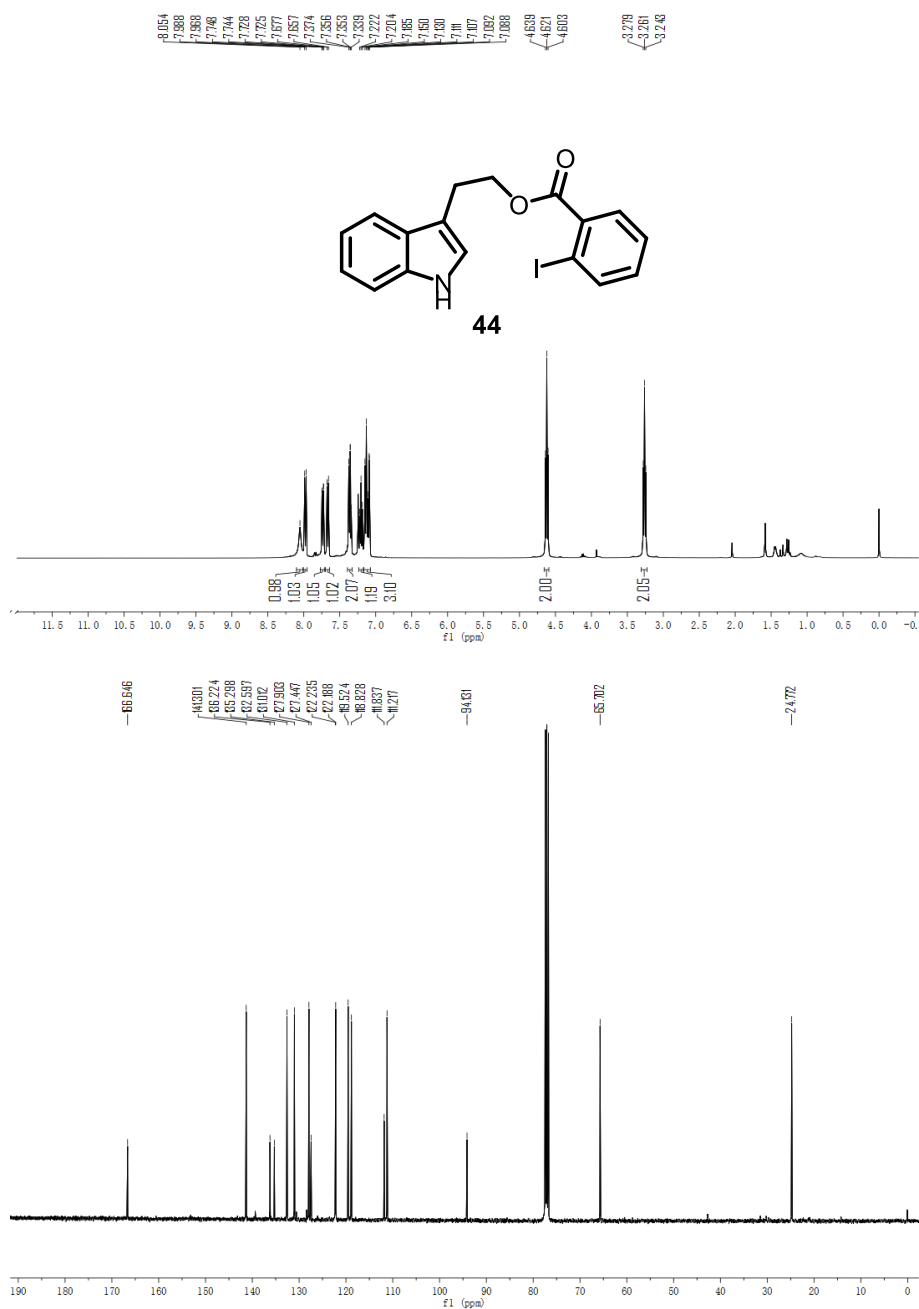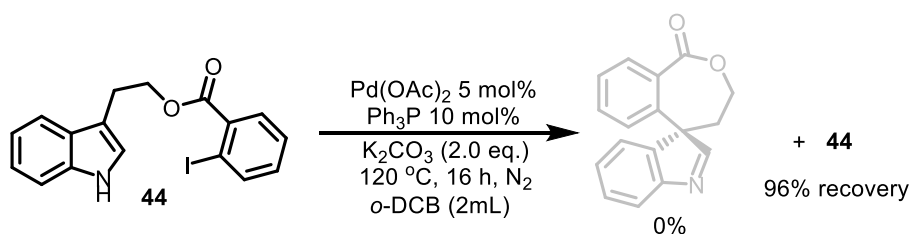

**44** (0.2 mmol, 78 mg, 1.0eq.), Pd(OAc)<sub>2</sub> (0.01 mmol, 2.2 mg, 0.05 eq), Ph<sub>3</sub>P (0.02 mmol, 5.2 mg, 0.1 eq), and K<sub>2</sub>CO<sub>3</sub> (0.4 mmol, 56 mg, 2.0 eq) were added to a flame-dried Schlenk flask containing a stirring bar and purged by evacuating the flask and backfilling with N<sub>2</sub> three times. Then, anhydrous *o*-DCB (2 ml) was added and the flask was sealed. The reaction mixture was stirred at 120 °C for 16 h and monitored by TLC. Then the reaction mixture is subjected to dry loading and column

chromatography to obtain **44** (75 mg, 96% recovery) over silica gel using EtOAc/ n-hexane = 10%~20% as eluent.

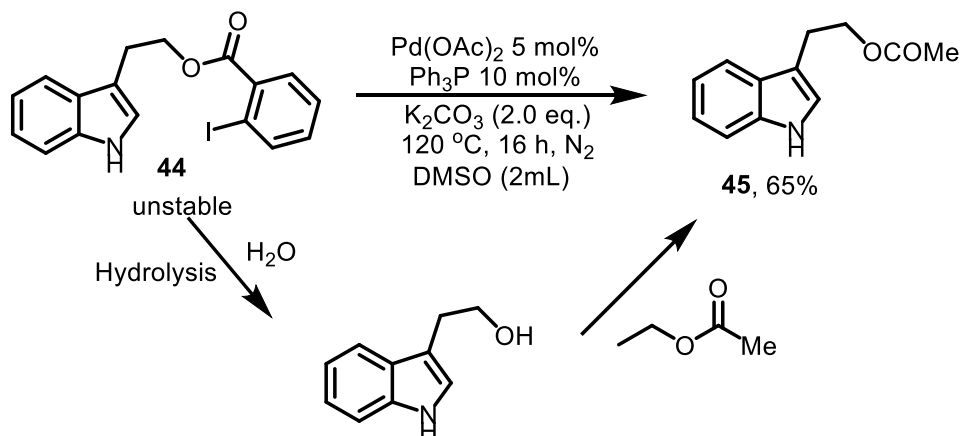

**44** (0.2 mmol, 78 mg, 1.0eq.), Pd(OAc)<sub>2</sub> (0.01 mmol, 2.2 mg, 0.05 eq), Ph<sub>3</sub>P (0.02 mmol, 5.2 mg, 0.1 eq), and K<sub>2</sub>CO<sub>3</sub> (0.4 mmol, 56 mg, 2.0 eq) were added to a flame-dried Schlenk flask containing a stirring bar and purged by evacuating the flask and backfilling with N<sub>2</sub> three times. Then, anhydrous DMSO (2 ml) was added and the flask was sealed. The reaction mixture was stirred at 120 °C for 16 h and monitored by TLC. The reaction mixture was then extracted three times with **ethyl acetate** (3 mL) and water (3 mL). The organic phase was collected and subjected to dry loading and column chromatography to give **45** (26 mg, 65%) over silica gel using EtOAc/ n-hexane = 10%~20% as eluent.

<sup>1</sup>H NMR (400 MHz, CDCl<sub>3</sub>) δ 8.02 (s, 1H), 7.63 (d, *J* = 7.8 Hz, 1H), 7.36 (d, *J* = 8.1 Hz, 1H), 7.24 – 7.17 (m, 1H), 7.17 – 7.10 (m, 1H), 7.05 (d, *J* = 2.2 Hz, 1H), 4.35 (t, *J* = 7.2 Hz, 2H), 3.10 (t, *J* = 7.2 Hz, 2H), 2.06 (s, 3H) ppm;

<sup>13</sup>C NMR (100 MHz, CDCl<sub>3</sub>) δ 171.2, 136.2, 127.5, 122.1, 122.0, 119.5, 118.8, 112.1, 111.2, 64.6, 24.8, 21.1 ppm;

LCMS (ESI) *m/z* calcd for C<sub>12</sub>H<sub>14</sub>NO<sub>2</sub><sup>+</sup> (M+H)<sup>+</sup> 204, found *m/z* 204.

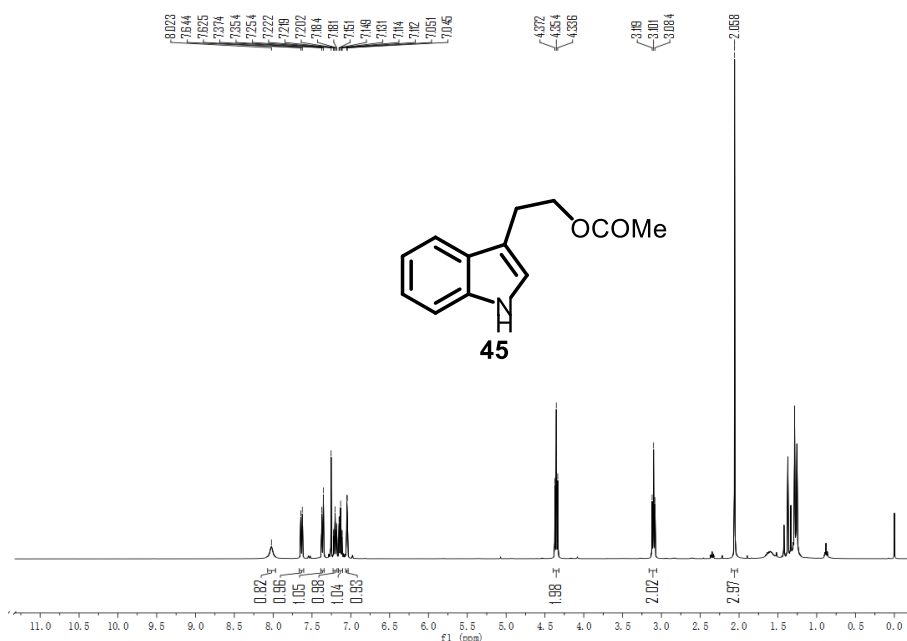

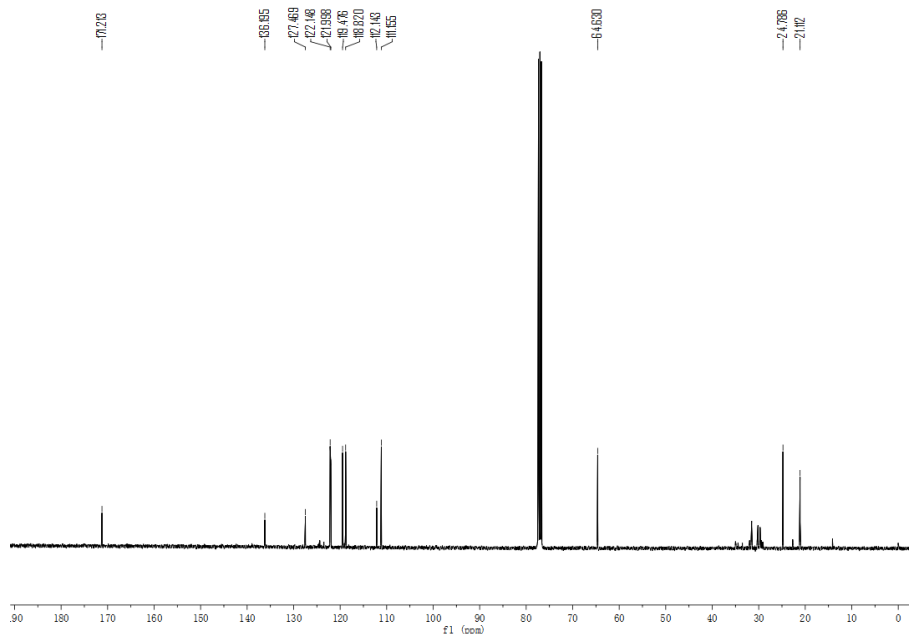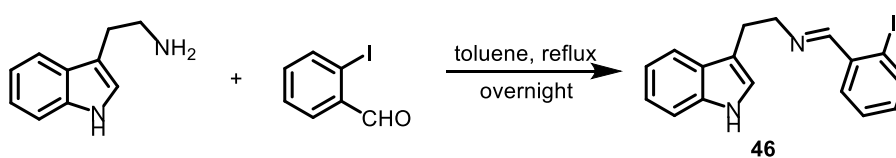

To a solution of tryptamine (10 mmol, 1.60 g, 1.0 equiv.) and *o*-iodobenzaldehyde (10 mmol, 2.32 g, 1.0 equiv.) in toluene (30 mL) in a round bottom flask equipped with a magnetic stir bar. The reaction mixture was refluxed overnight. After completion of the reaction, the reaction mixture was concentrated under reduced pressure and recrystallized by methanol to afford **46** white solid, 2.9 g, 77% yield.

**<sup>1</sup>H NMR** (400 MHz, CDCl<sub>3</sub>) δ 8.31 (s, 1H), 8.03 – 7.90 (m, 2H), 7.82 (d, *J* = 7.8 Hz, 1H), 7.67 (d, *J* = 7.8 Hz, 1H), 7.36 (t, *J* = 8.1 Hz, 2H), 7.19 (t, *J* = 7.2 Hz, 1H), 7.13 (t, *J* = 7.4 Hz, 1H), 7.08 (td, *J* = 7.7, 1.7 Hz, 1H), 7.03 (d, *J* = 2.0 Hz, 1H), 4.00 (dd, *J* = 7.2, 6.6 Hz, 2H), 3.18 (t, *J* = 7.2 Hz, 2H) ppm;

**<sup>13</sup>C NMR** (100 MHz, CDCl<sub>3</sub>) δ 164.7, 139.6, 137.2, 136.3, 131.9, 128.7, 128.4, 127.6, 122.1, 122.0, 119.3, 119.0, 114.0, 111.1, 99.9, 61.7, 26.8 ppm;

**LCMS (ESI)** *m/z* calcd for C<sub>17</sub>H<sub>16</sub>IN<sub>2</sub><sup>+</sup> (*M*+H)<sup>+</sup> 375, found *m/z* 375.

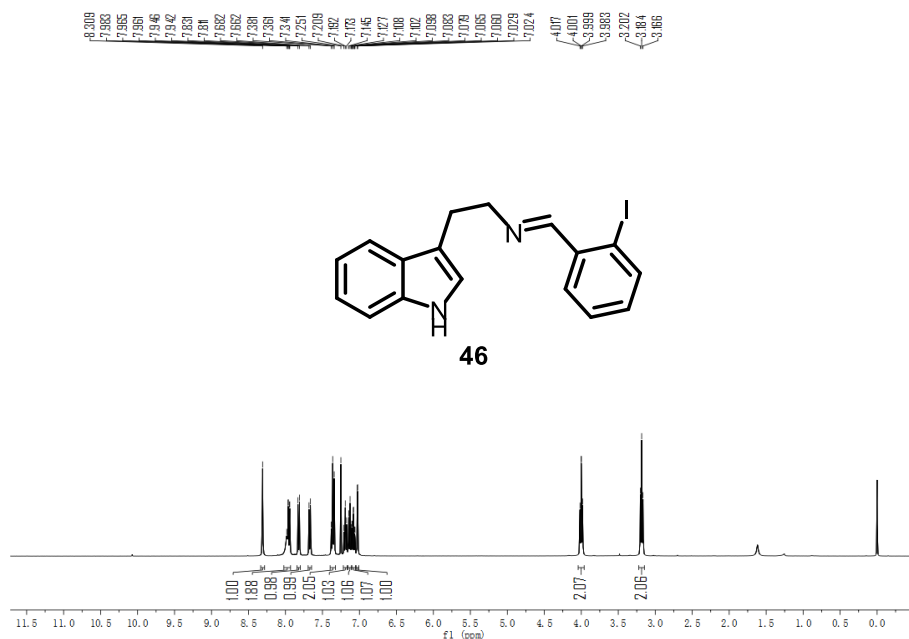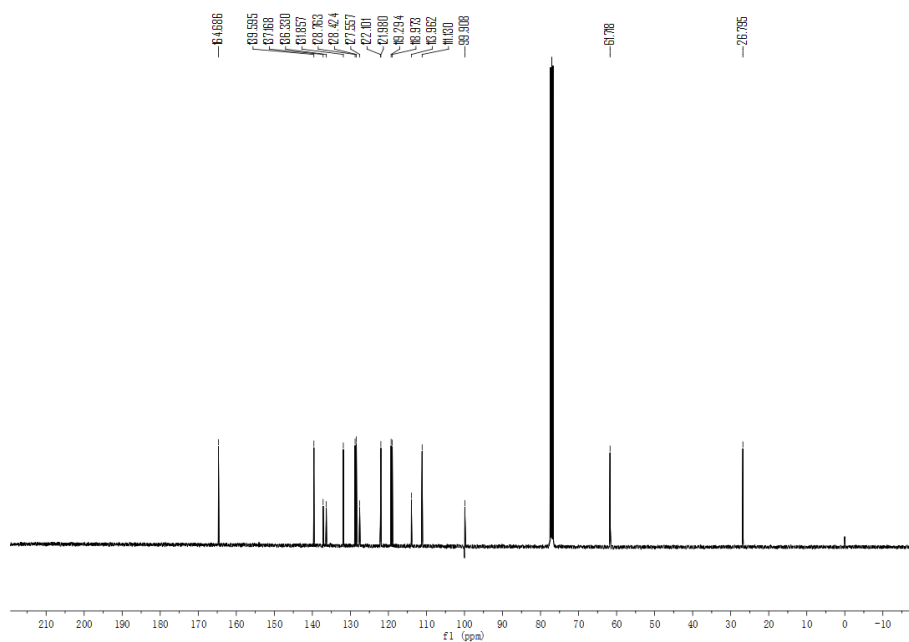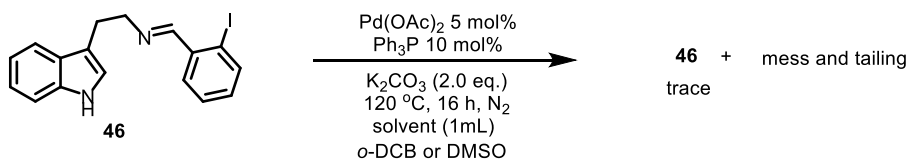

**46** (0.2 mmol, 75 mg, 1.0eq.), Pd(OAc)<sub>2</sub> (0.01 mmol, 2.2 mg, 0.05 eq), Ph<sub>3</sub>P (0.02 mmol, 5.2 mg, 0.1 eq), and K<sub>2</sub>CO<sub>3</sub> (0.4 mmol, 56 mg, 2.0 eq) were added to a flame-dried Schlenk flask containing a stirring bar and purged by evacuating the flask and backfilling with N<sub>2</sub> three times. Then, anhydrous *o*-DCB or DMSO (2 ml) was added and the flask was sealed. The reaction mixture was stirred at 120 °C for 16 h. The reaction mixture was then extracted three times with **ethyl acetate** (3 mL) and water (3 mL). The organic phase was collected and monitored by TLC. Substrate **46** was almost completely converted, but the reaction TLC spot plate was confused and trailing.



## 5. Solvent Effects of this Reaction

### 5.1 Effect of neutral aryl aldehyde subunits on the reaction with DMSO as solvent

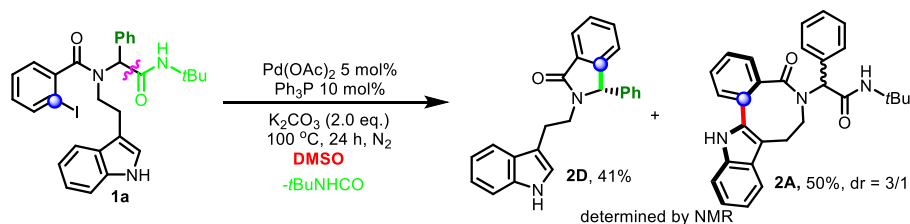

Ugi products **1a** (0.1 mmol, 58 mg),  $\text{Pd}(\text{OAc})_2$  (0.005 mmol, 1.1 mg, 0.05 eq),  $\text{Ph}_3\text{P}$  (0.01 mmol, 2.6 mg, 0.1 eq), and  $\text{K}_2\text{CO}_3$  (0.2 mmol, 28 mg, 2.0 eq) were added to a flame-dried Schlenk flask containing a stirring bar and purged by evacuating the flask and backfilling with  $\text{N}_2$  three times. Then, anhydrous **DMSO** (1 ml) was added and the flask was sealed. The reaction mixture was stirred at  $100\text{ }^\circ\text{C}$  for 24 h and monitored by TLC. The reaction mixture was then extracted three times with ethyl acetate (3 mL) and water (3 mL). The organic phase was collected and subjected to dry loading and column chromatography to give **2D** (14 mg, 41%) and **2A** (23 mg, 50%, dr = 3/1) over silica gel using EtOAc/ n-hexane = 20%~30% as eluent.

### 5.2 Effect of electron-deficient aryl aldehyde subunits on the reaction with DMSO as solvent

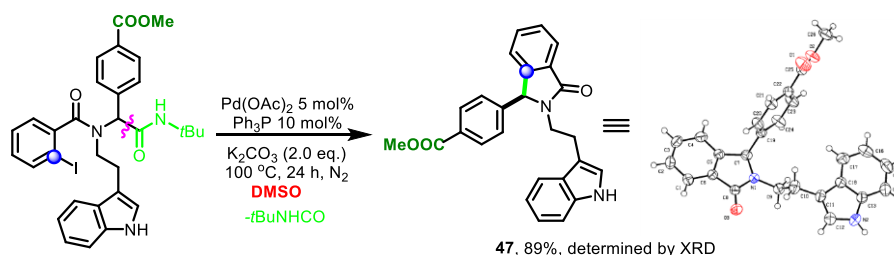

Ugi products (0.1 mmol, 64 mg),  $\text{Pd}(\text{OAc})_2$  (0.005 mmol, 1.1 mg, 0.05 eq),  $\text{Ph}_3\text{P}$  (0.01 mmol, 2.6 mg, 0.1 eq), and  $\text{K}_2\text{CO}_3$  (0.2 mmol, 28 mg, 2.0 eq) were added to a flame-dried Schlenk flask containing a stirring bar and purged by evacuating the flask and backfilling with  $\text{N}_2$  three times. Then, anhydrous **DMSO** (1 ml) was added and the flask was sealed. The reaction mixture was stirred at  $100\text{ }^\circ\text{C}$  for 24 h and monitored by TLC. The reaction mixture was then extracted three times with ethyl acetate (3 mL) and water (3 mL). The organic phase was collected and subjected to dry loading and column chromatography to give **47** (36 mg, 89%) white solid over silica gel using EtOAc/ n-hexane = 20%~30% as eluent.

$^1\text{H NMR}$  (400 MHz,  $\text{CDCl}_3$ )  $\delta$  8.17 (s, 1H), 8.01 – 7.82 (m, 3H), 7.48 – 7.39 (m, 3H), 7.35 (d,  $J$  = 8.1 Hz, 1H), 7.18 (t,  $J$  = 7.5 Hz, 1H), 7.05 (t,  $J$  = 7.5 Hz, 1H), 7.01 (d,  $J$  = 7.1 Hz, 1H), 6.98 (dd,  $J$  = 5.6, 2.6 Hz, 3H), 5.17 (s, 1H), 4.38 – 4.21 (m, 1H), 3.90 (s, 3H), 3.26 – 3.17 (m, 1H), 3.12 (dt,  $J$  = 14.7, 7.3 Hz, 1H), 3.06 – 2.92 (m, 1H) ppm;

$^{13}\text{C NMR}$  (100 MHz,  $\text{CDCl}_3$ )  $\delta$  168.7, 166.5, 145.7, 142.2, 136.3, 131.8, 131.6, 130.5, 130.23, 128.5, 127.7, 127.2, 123.6, 122.9, 122.2, 122.1, 119.4, 118.6, 112.7, 111.3, 64.6, 52.3, 40.7, 24.4 ppm;

**HRMS (ESI)**  $m/z$  calcd for  $\text{C}_{26}\text{H}_{23}\text{N}_2\text{O}_3^+$  ( $\text{M}+\text{H}$ ) $^+$  411.1703, found  $m/z$  411.1700.

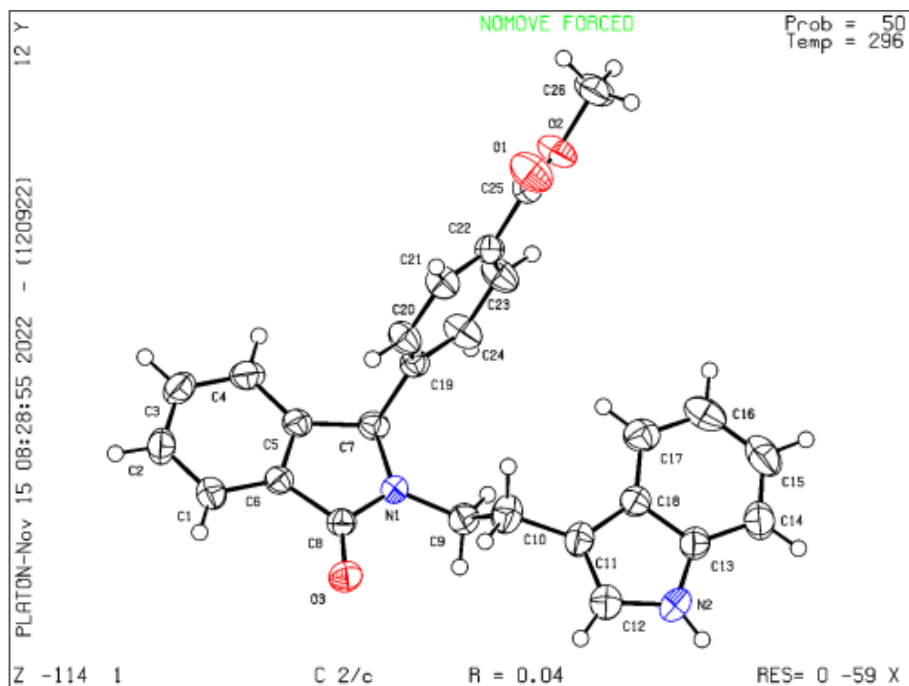

### Datablock: 1

|                              |                |                    |               |
|------------------------------|----------------|--------------------|---------------|
| Bond precision:              | C-C = 0.0027 Å | Wavelength=0.71073 |               |
| Cell:                        | a=36.487(3)    | b=6.1129(5)        | c=18.5679(16) |
|                              | alpha=90       | beta=97.336(1)     | gamma=90      |
| Temperature:                 | 296 K          |                    |               |
| Volume                       | Calculated     | Reported           |               |
|                              | 4107.5(6)      | 4107.5(6)          |               |
| Space group                  | C 2/c          | C 2/c              |               |
| Hall group                   | -C 2yc         | -C 2yc             |               |
| Moiety formula               | C26 H22 N2 O3  | ?                  |               |
| Sum formula                  | C26 H22 N2 O3  | C26 H22 N2 O3      |               |
| Mr                           | 410.46         | 410.45             |               |
| Dx, g cm <sup>-3</sup>       | 1.327          | 1.327              |               |
| Z                            | 8              | 8                  |               |
| Mu (mm <sup>-1</sup> )       | 0.088          | 0.088              |               |
| F000                         | 1728.0         | 1728.0             |               |
| F000'                        | 1728.76        |                    |               |
| h, k, lmax                   | 42, 7, 22      | 42, 7, 22          |               |
| Nref                         | 3623           | 3608               |               |
| Tmin, Tmax                   | 0.977, 0.981   |                    |               |
| Tmin'                        | 0.977          |                    |               |
| Correction method= Not given |                |                    |               |
| Data completeness=           | 0.996          | Theta(max)= 24.999 |               |
| R(reflections)=              | 0.0416( 2667)  | wR2(reflections)=  |               |
| S =                          | 0.937          | 0.1087( 3608)      |               |
|                              | Npar= 281      |                    |               |

The following ALERTS were generated. Each ALERT has the format  
**test-name\_ALERT\_alert-type\_alert-level**.  
 Click on the hyperlinks for more details of the test.

| Alert level C     |                                                  |             |              |
|-------------------|--------------------------------------------------|-------------|--------------|
| PLAT230_ALERT_2_C | Hirshfeld Test Diff for N1 --C9                  | 5.5 s.u.    |              |
| PLAT906_ALERT_3_C | Large K Value in the Analysis of Variance        | 4.816       | Check        |
| PLAT910_ALERT_3_C | Missing # of FCF Reflection(s) Below Theta(Min)  | 5           | Note         |
| PLAT911_ALERT_3_C | Missing FCF Refl Between Thmin & STh/L=          | 0.595       | 10 Report    |
| Alert level G     |                                                  |             |              |
| PLAT007_ALERT_5_G | Number of Unrefined Donor-H Atoms                | 1           | Report       |
| PLAT793_ALERT_4_G | Model has Chirality at C7 (Centro SPGR)          | R           | Verify       |
| PLAT883_ALERT_1_G | No Info/Value for _atom_sites_solution_primary   |             | Please Do !  |
| PLAT909_ALERT_3_G | Percentage of I>2sig(I) Data at Theta(Max) Still | 51%         | Note         |
| PLAT933_ALERT_2_G | Number of HKL-OMIT Records in Embedded .res File | 8           | Note         |
| PLAT941_ALERT_3_G | Average HKL Measurement Multiplicity             | 2.8         | Low          |
| PLAT961_ALERT_5_G | Dataset Contains no Negative Intensities         |             | Please Check |
| PLAT965_ALERT_2_G | The SHELXL WEIGHT Optimisation has not Converged |             | Please Check |
| PLAT967_ALERT_5_G | Note: Two-Theta Cutoff Value in Embedded .res    | 50.0 Degree |              |
| PLAT978_ALERT_2_G | Number C-C Bonds with Positive Residual Density. | 4           | Info         |

0 ALERT level A = Most likely a serious problem - resolve or explain  
 0 ALERT level B = A potentially serious problem, consider carefully  
 4 ALERT level C = Check. Ensure it is not caused by an omission or oversight  
 10 ALERT level G = General information/check it is not something unexpected

1 ALERT type 1 CIF construction/syntax error, inconsistent or missing data  
 4 ALERT type 2 Indicator that the structure model may be wrong or deficient  
 5 ALERT type 3 Indicator that the structure quality may be low  
 1 ALERT type 4 Improvement, methodology, query or suggestion  
 3 ALERT type 5 Informative message, check

### 5.3 Effect of electron-rich aryl aldehyde subunits on the reaction with DMSO as solvent

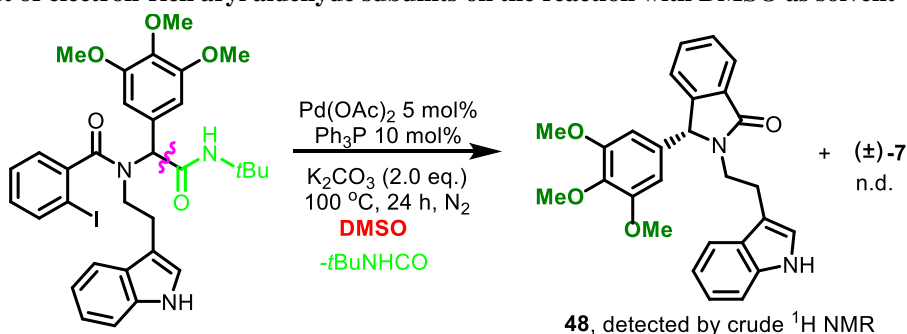

Ugi products (0.1 mmol, 67 mg),  $\text{Pd(OAc)}_2$  (0.005 mmol, 1.1 mg, 0.05 eq),  $\text{Ph}_3\text{P}$  (0.01 mmol, 2.6 mg, 0.1 eq), and  $\text{K}_2\text{CO}_3$  (0.2 mmol, 28 mg, 2.0 eq) were added to a flame-dried Schlenk flask containing a stirring bar and purged by evacuating the flask and backfilling with  $\text{N}_2$  three times. Then, anhydrous **DMSO** (1 ml) was added and the flask was sealed. The reaction mixture was stirred at 100 °C for 24 h and monitored by TLC. After complete conversion of the Ugi product, The reaction mixture was then extracted three times with ethyl acetate (3 mL) and water (3 mL). The organic phase was collected, the organic solvent was removed under reduced pressure and the crude NMR was made directly.

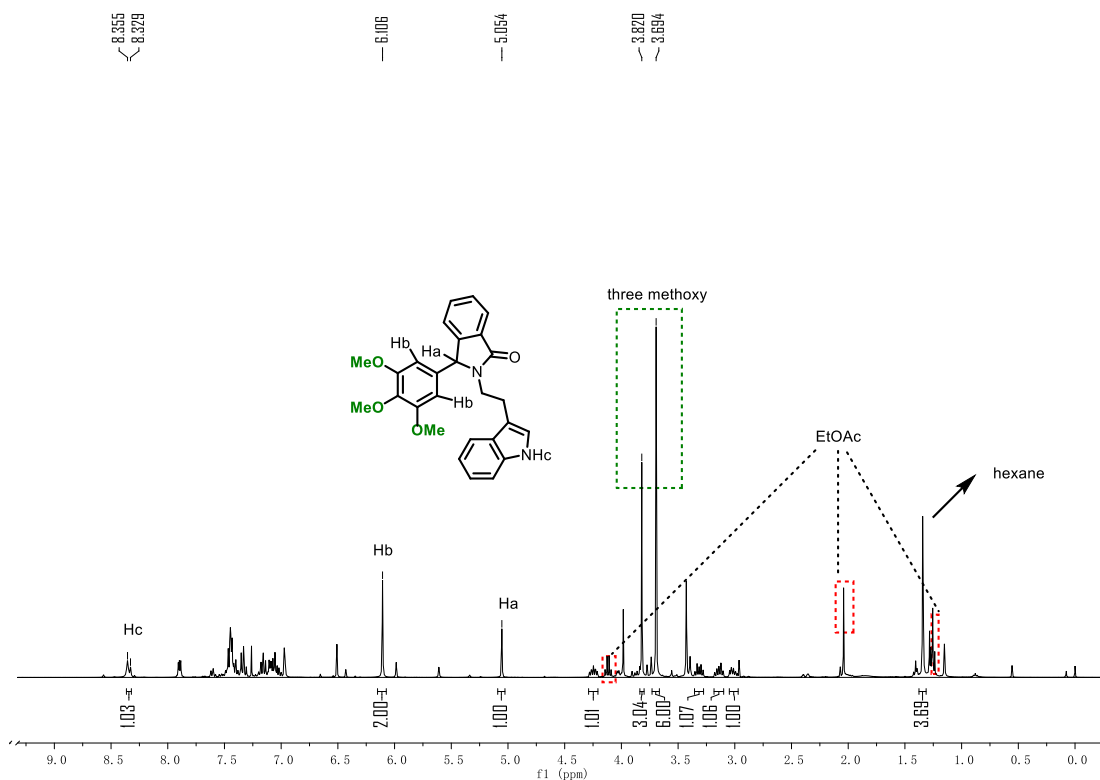

## 6. Gram Scale-up Experiment

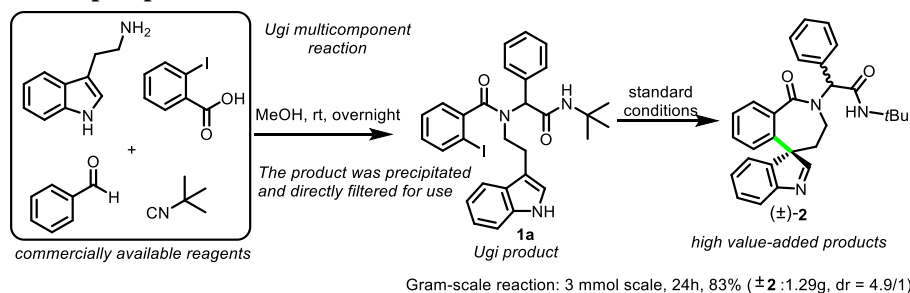

### Procedure 1: synthesis of Ugi products **1a**

To a solution of benzaldehyde (4 mmol, 408  $\mu$ L, 1.0 equiv.) in methanol (10 mL) were added successively tryptamine (4 mmol, 641 mg, 1.0 equiv.), *o*-iodobenzoic acid (4 mmol, 992 mg, 1.0 equiv) and isonitrile (3.72 mmol, 389  $\mu$ L, 0.93 equiv.) in a screw capped vial equipped with a magnetic stir bar. The reaction mixture was stirred at room temperature overnight. After completion of the reaction, the product would be precipitated in solid form, and the desired yellow solid Ugi products **1a** could be obtained directly by filtration (1.85g, 86%).

### Procedure 2: synthesis of 3,4-dihydrospiro[benzo[*c*]azepine-5,3'-indol]-1(2H)-one ( $\pm$ )-2

Ugi products **1a** (3 mmol, 1.74g, 1.0 eq.), Pd(OAc)<sub>2</sub> (0.15 mmol, 34 mg, 0.05 eq), Ph<sub>3</sub>P (0.3 mmol, 79 mg, 0.1 eq), and K<sub>2</sub>CO<sub>3</sub> (6 mmol, 829 mg, 2.0 eq) were added to a flame-dried Schlenk flask containing a stirring bar and purged by evacuating the flask and backfilling with N<sub>2</sub> three times. Then, anhydrous *o*-DCB (30 ml) was added and the flask was sealed. The reaction mixture was stirred at 120 °C for 24 h and monitored by TLC. After the reaction was finished, the mixture was extracted with

ethyl acetate and water, and the organic phase was dried with anhydrous sodium sulfate and concentrated, the residue was purified by chromatography on silica gel (EtOAc/ n-hexane = 30%~40% as eluent) to afford the (±)-**2** (**2down** 0.93g + **2up** 0.19 g = 1.12 g, 83% yield).

## 7. Follow-Up Experiment

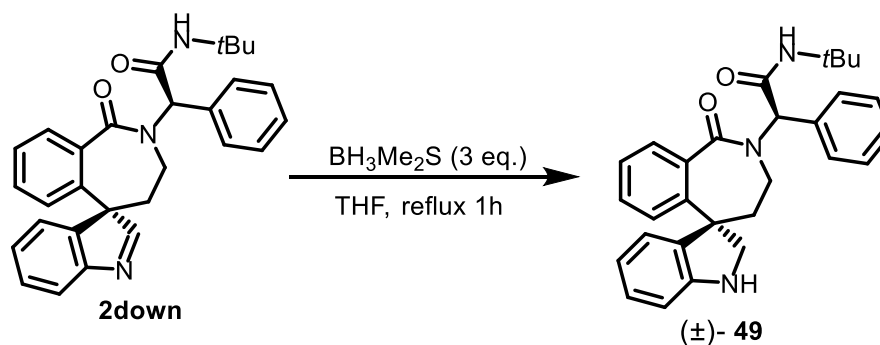

An oven-dried glass tube (10 mL) was equipped with a magnetic stir bar, **2down** (0.1 mmol, 45 mg, 1.0 eq.),  $\text{BH}_3\text{Me}_2\text{S}$  (0.4 mmol, 46  $\mu\text{L}$ , 4.0 eq.), and 2.0 ml THF were added and the flask was sealed. The resulting solution was stirred at 80 °C for 1h and monitored by TLC. After the reaction was finished, the mixture was extracted with ethyl acetate and water, and the organic phase was dried with anhydrous sodium sulfate and concentrated, the residue was purified by chromatography on silica gel (EA/PE = 3/10) to afford the (±)-**49** (28 mg, 63% yield).

*N*-(*tert*-butyl)-2-(1-oxo-3,4-dihydrospiro[benzo[*c*]azepine-5,3'-indolin]-2(1*H*)-yl)-2-phenylacetamide (±)-**44**

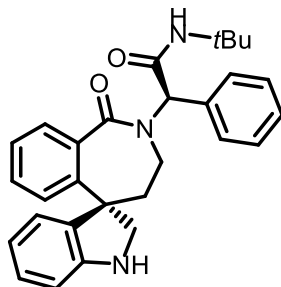

White solid, (±)-**44**, 28 mg, 63% yield,  $R_f = 0.4$  (ethyl acetate/hexane = 40%);

$^1\text{H NMR}$  (400 MHz,  $\text{CDCl}_3$ )  $\delta$  7.74 (dd,  $J = 7.6, 1.5$  Hz, 1H), 7.47 (dd,  $J = 7.8, 1.4$  Hz, 2H), 7.35 – 7.28 (m, 3H), 7.23 (td,  $J = 7.5, 1.1$  Hz, 1H), 7.13 (td,  $J = 7.6, 1.5$  Hz, 1H), 7.08 – 7.00 (m, 2H), 6.76 (t,  $J = 7.5$  Hz, 1H), 6.65 – 6.55 (m, 2H), 6.21 (s, 1H), 5.53 (s, 1H), 3.65 – 3.56 (m, 2H), 3.48 – 3.36 (m, 1H), 3.21 (d,  $J = 9.2$  Hz, 1H), 2.08 (dd,  $J = 14.4, 3.9$  Hz, 1H), 1.30 (s, 9H), 0.81 (t,  $J = 6.8$  Hz, 1H) ppm;

$^{13}\text{C NMR}$  (100 MHz,  $\text{CDCl}_3$ )  $\delta$  172.2, 168.7, 150.9, 142.5, 135.3, 135.0, 132.6, 130.6, 130.5, 130.1, 129.0, 128.9, 128.6, 127.3, 126.6, 125.9, 118.7, 110.6, 66.0, 60.8, 52.9, 51.8, 43.3, 43.2, 31.4, 30.2, 28.7;

**HRMS (ESI)**  $m/z$  calcd for  $\text{C}_{29}\text{H}_{32}\text{N}_3\text{O}_2^+$  ( $\text{M}+\text{H}$ ) $^+$  454.2489, found  $m/z$  454.2493.

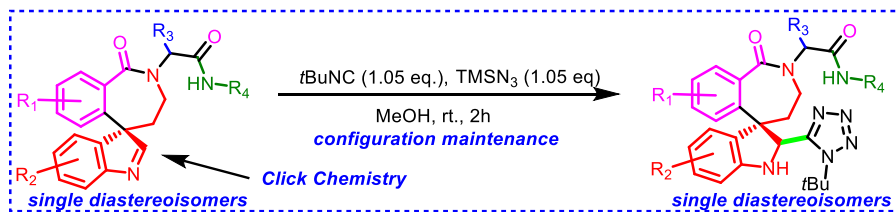

To a solution of dearomatization products (1.0 equiv.) in methanol (1 mL) were added successively  $\text{TMSN}_3$  (1.05 equiv.) and *tert*-butyl isonitrile (1.05 equiv.) in a screw capped vial equipped with a magnetic stir bar. The reaction mixture was stirred at room temperature for 2h. After completion of the reaction, the reaction mixture was concentrated under reduced pressure followed by column chromatography over silica gel using petroleum / EtOAc = 10/3~5/2 as eluent to afford the conformation-maintaining ( $\pm$ )-**50**-( $\pm$ )-**57**

*N*-(*tert*-butyl)-2-(2'-(1-(*tert*-butyl)-1*H*-tetrazol-5-yl)-1-oxo-3,4-dihydrospiro[benzo[*c*]azepine-5,3'-indolin]-2(1*H*)-yl)-2-phenylacetamide ( $\pm$ )-**50**

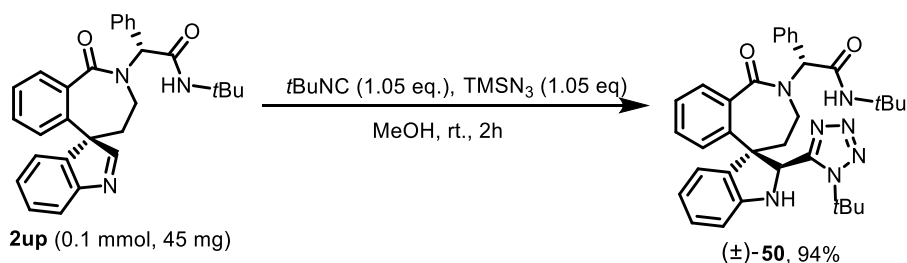

From **2up** (0.1 mmol scale, 45 mg)

Yellow solid, ( $\pm$ )-**50**, 54 mg, 94% yield,  $R_f = 0.4$  (ethyl acetate/hexane = 30%);

$^1\text{H NMR}$  (400 MHz,  $\text{CDCl}_3$ )  $\delta$  7.77 (d,  $J = 7.9$  Hz, 1H), 7.64 (dd,  $J = 7.7, 1.5$  Hz, 1H), 7.39 – 7.30 (m, 5H), 7.28 (dd,  $J = 7.8, 1.5$  Hz, 1H), 7.21 (dd,  $J = 10.2, 4.3$  Hz, 2H), 7.11 (t,  $J = 7.6$  Hz, 1H), 6.88 (t,  $J = 7.5$  Hz, 1H), 6.74 (d,  $J = 7.8$  Hz, 1H), 6.46 (s, 1H), 6.02 (s, 1H), 5.64 (s, 1H), 3.47 – 3.36 (m, 1H), 3.18 (dd,  $J = 8.0, 3.0$  Hz, 2H), 2.08 (d,  $J = 14.1$  Hz, 1H), 1.61 (s, 9H), 1.42 (s, 9H) ppm;

$^{13}\text{C NMR}$  (100 MHz,  $\text{CDCl}_3$ )  $\delta$  171.7, 168.9, 154.1, 148.1, 136.7, 136.7, 135.9, 135.5, 131.3, 130.8, 130.3, 129.1, 129.0, 128.6, 128.0, 127.4, 125.1, 120.3, 111.6, 63.1, 62.2, 62.0, 59.7, 51.9, 44.3, 42.0, 30.5, 28.8;

**HRMS (ESI)**  $m/z$  calcd for  $\text{C}_{34}\text{H}_{40}\text{N}_7\text{O}_2^+$  ( $\text{M}+\text{H}$ ) $^+$  578.3238, found  $m/z$  578.3235.

*N*-(*tert*-butyl)-2-(2'-(1-(*tert*-butyl)-1*H*-tetrazol-5-yl)-1-oxo-3,4-dihydrospiro[benzo[*c*]azepine-5,3'-indolin]-2(1*H*)-yl)-2-(2-fluorophenyl)acetamide ( $\pm$ )-**51**

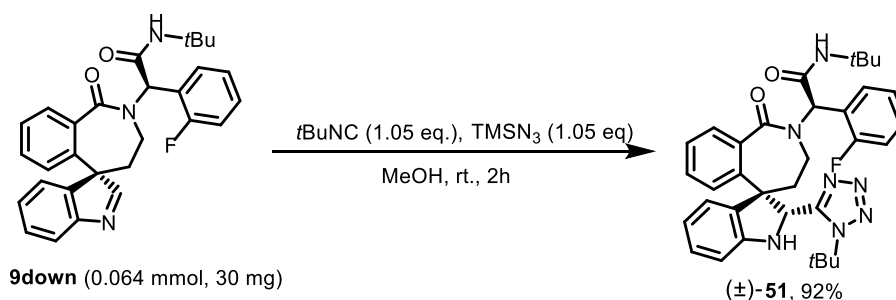

From **9down** (0.064 mmol scale, 30 mg)

Yellow solid, ( $\pm$ )-**51**, 35 mg, 92% yield, Rf = 0.4 (ethyl acetate/hexane = 30%);

$^1\text{H NMR}$  (400 MHz,  $\text{CDCl}_3$ )  $\delta$  7.75 (dd,  $J = 7.4, 1.8$  Hz, 1H), 7.71–7.66 (m, 1H), 7.59 (t,  $J = 7.0$  Hz, 1H), 7.42 (dd,  $J = 13.4, 6.1$  Hz, 1H), 7.28 – 7.24 (m, 1H), 7.21 (dd,  $J = 13.4, 7.1$  Hz, 3H), 7.08 (t,  $J = 7.6$  Hz, 1H), 6.86 (t,  $J = 7.5$  Hz, 1H), 6.67 (d,  $J = 7.8$  Hz, 1H), 6.39 (s, 1H), 5.62 (s, 1H), 5.46 (s, 1H), 4.01 (brs, 1H), 3.66 (ddd,  $J = 15.2, 12.3, 2.6$  Hz, 1H), 3.34 (dt,  $J = 15.5, 3.5$  Hz, 1H), 2.29 – 2.17 (m, 1H), 1.84 (dt,  $J = 14.9, 2.9$  Hz, 1H), 1.59 (s, 9H), 1.37 (s, 9H) ppm;

$^{13}\text{C NMR}$  (100 MHz,  $\text{CDCl}_3$ )  $\delta$  171.3, 167.9, 161.2 (d,  $J = 247.2$  Hz), 153.9, 147.6, 136.7, 135.8, 135.3, 131.8, 131.7, 131.4 (d,  $J = 2.9$  Hz), 131.1 (d,  $J = 8.4$  Hz), 130.5, 128.0, 127.7, 125.0 (d,  $J = 3.3$  Hz), 124.8, 122.5 (d,  $J = 14.3$  Hz), 120.6, 115.9 (d,  $J = 22.0$  Hz), 111.1, 64.4, 61.9, 59.7, 56.1, 52.0, 44.7, 42.6, 30.5, 30.4, 28.6 ppm;

**HRMS (ESI)**  $m/z$  calcd for  $\text{C}_{34}\text{H}_{39}\text{FN}_7\text{O}_2^+$  ( $\text{M}+\text{H}$ ) $^+$  596.3144, found  $m/z$  596.3149.

***N*-(tert-butyl)-2-(2'-(1-(tert-butyl)-1H-tetrazol-5-yl)-1-oxo-3,4-dihydrospiro[benzo[*c*]azepine-5,3'-indolin]-2(1H)-yl)-2-(3,4,5-trimethoxyphenyl)acetamide ( $\pm$ )-**52****

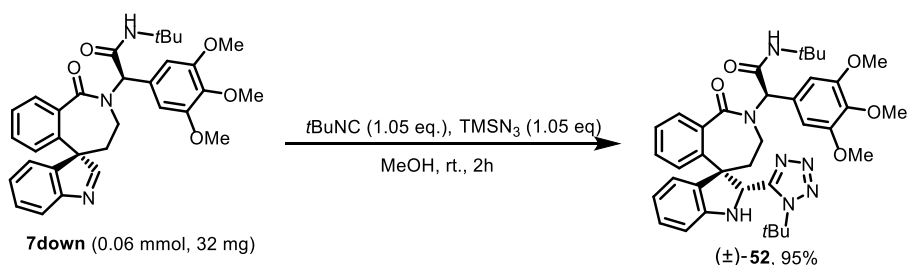

From **7down** (0.06 mmol scale, 32 mg)

Yellow solid, ( $\pm$ )-**52**, 38 mg, 95% yield, Rf = 0.2 (ethyl acetate/hexane = 40%);

$^1\text{H NMR}$  (400 MHz,  $\text{CDCl}_3$ )  $\delta$  7.79 (d,  $J = 7.7$  Hz, 1H), 7.23 (dd,  $J = 11.3, 4.8$  Hz, 1H), 7.15 (q,  $J = 7.7$  Hz, 3H), 7.02 (d,  $J = 7.5$  Hz, 1H), 6.86 – 6.72 (m, 4H), 6.23 (s, 1H), 5.56 (s, 1H), 5.32 (s, 1H), 4.22 (s, 1H), 3.88 (s, 3H), 3.87 (s, 6H), 3.78 – 3.61 (m, 1H), 3.53 (dd,  $J = 11.9, 4.0$  Hz, 1H), 2.16 – 2.10 (m, 2H), 1.42 (s, 9H), 1.37 (s, 9H) ppm;

$^{13}\text{C NMR}$  (100 MHz,  $\text{CDCl}_3$ )  $\delta$  171.2, 168.4, 154.3, 153.6, 148.0, 138.4, 136.6, 136.3, 136.2, 132.2, 132.1, 131.9, 131.1, 130.3, 128.6, 128.5, 127.9, 124.6, 120.4, 110.9, 106.5, 66.6, 62.2, 62.0, 61.0, 60.6, 56.3, 51.9, 45.7, 42.2, 30.4, 28.7 ppm;

**HRMS (ESI)**  $m/z$  calcd for  $\text{C}_{37}\text{H}_{46}\text{N}_7\text{O}_5^+$  ( $\text{M}+\text{H}$ ) $^+$  668.3555, found  $m/z$  668.3552.

***N*-(tert-butyl)-2-(2'-(1-(tert-butyl)-1H-tetrazol-5-yl)-7,8-difluoro-1-oxo-3,4-dihydrospiro[benzo[*c*]azepine-5,3'-indolin]-2(1H)-yl)-2-phenylacetamide ( $\pm$ )-**53****

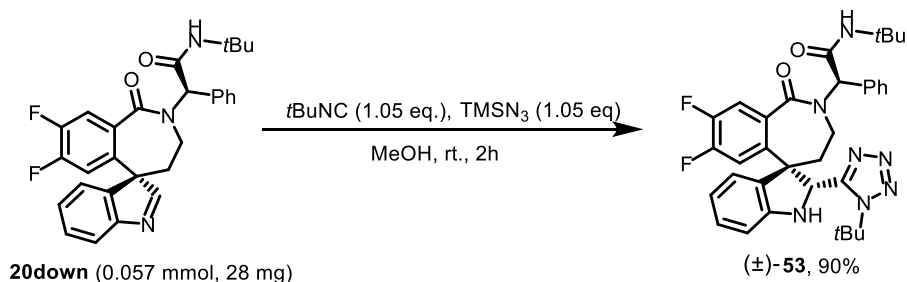

From **20down** (0.057 mmol scale, 28 mg)

Yellow solid, ( $\pm$ )-**53**, 31 mg, 90% yield, Rf = 0.4 (ethyl acetate/hexane = 30%);

**<sup>1</sup>H NMR** (400 MHz, CDCl<sub>3</sub>) δ 7.57 (dd, *J* = 12.3, 7.8 Hz, 1H), 7.46 (d, *J* = 8.3 Hz, 3H), 7.38 (d, *J* = 7.0 Hz, 2H), 7.28 (t, *J* = 2.0 Hz, 1H), 7.14 (d, *J* = 7.5 Hz, 1H), 7.10 – 7.00 (m, 1H), 6.84 (t, *J* = 7.5 Hz, 1H), 6.56 (d, *J* = 7.8 Hz, 1H), 6.12 (s, 1H), 5.38 (s, 1H), 5.25 (s, 1H), 3.80 (s, 1H), 3.64 – 3.51 (m, 1H), 3.44 (dd, *J* = 11.4, 7.9 Hz, 1H), 2.09 – 1.95 (m, 1H), 1.79 – 1.68 (m, 1H), 1.59 (s, 9H), 1.28 (s, 9H) ppm;

**<sup>13</sup>C NMR** (100 MHz, CDCl<sub>3</sub>) δ 169.5, 168.0, 153.3, 147.6 (d, *J* = 7.0 Hz), 147.3, 147.1, 138.5 (d, *J* = 9.2 Hz), 135.3 (d, *J* = 25.7 Hz), 129.5, 129.4, 129.3, 128.4, 124.6, 124.5, 124.0, 120.7 (dd, *J* = 19.3, 13.0 Hz), 120.5, 119.1, 111.4, 63.8, 62.0, 58.7, 52.0, 44.5, 42.8, 30.7, 28.7 ppm;

**<sup>19</sup>F NMR** (376 MHz, CDCl<sub>3</sub>) δ -131.35 – -133.49 (m), -138.19 (ddd, *J* = 22.5, 10.9, 8.2 Hz) ppm;

**HRMS (ESI)** *m/z* calcd for C<sub>34</sub>H<sub>38</sub>F<sub>2</sub>N<sub>7</sub>O<sub>2</sub><sup>+</sup> (M+H)<sup>+</sup> 614.3050, found *m/z* 614.3051.

***N*-(*tert*-butyl)-2-(2'-(1-(*tert*-butyl)-1H-tetrazol-5-yl)-7-chloro-1-oxo-3,4-dihydrospiro[benzo[*c*]azepine-5,3'-indolin]-2(1H)-yl)-2-phenylacetamide (±)-54**

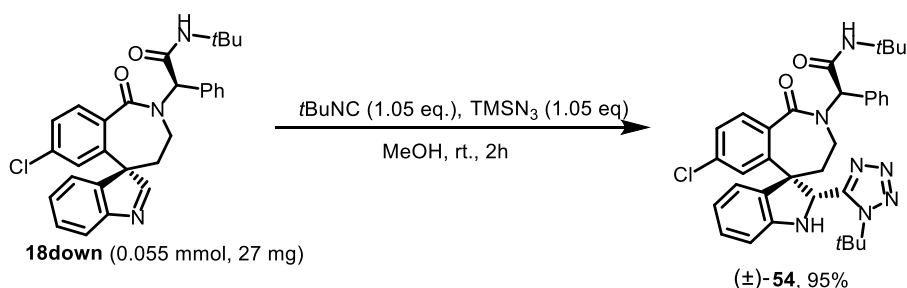

From **18down** (0.055 mmol scale, 27 mg)

White solid, (±)-**54**, 32 mg, 95% yield, *R*<sub>f</sub> = 0.4 (ethyl acetate/hexane = 30%);

**<sup>1</sup>H NMR** (400 MHz, CDCl<sub>3</sub>) δ 7.67 (d, *J* = 8.4 Hz, 1H), 7.63 (d, *J* = 2.0 Hz, 1H), 7.53 (d, *J* = 7.3 Hz, 2H), 7.49 – 7.40 (m, 3H), 7.24 – 7.17 (m, 2H), 7.10 (t, *J* = 7.5 Hz, 1H), 6.89 (t, *J* = 7.5 Hz, 1H), 6.65 (d, *J* = 7.8 Hz, 1H), 6.25 (s, 1H), 5.49 (s, 1H), 5.31 (s, 1H), 3.98 (s, 1H), 3.64 (ddd, *J* = 15.2, 12.0, 2.9 Hz, 1H), 3.50 (dt, *J* = 15.7, 3.7 Hz, 1H), 2.10 – 1.98 (m, 1H), 1.84 (dt, *J* = 15.0, 3.0 Hz, 1H), 1.60 (s, 9H), 1.35 (s, 9H) ppm;

**<sup>13</sup>C NMR** (100 MHz, CDCl<sub>3</sub>) δ 170.5, 168.2, 153.5, 147.5, 137.9, 136.8, 135.6, 135.4, 134.0, 133.1, 131.3, 129.5, 129.3, 129.2, 128.4, 128.0, 124.7, 120.8, 111.2, 64.4, 62.0, 61.8, 59.4, 52.0, 44.7, 42.6, 30.6, 28.7 ppm;

**HRMS (ESI)** *m/z* calcd for C<sub>34</sub>H<sub>39</sub>ClN<sub>7</sub>O<sub>2</sub><sup>+</sup> (M+H)<sup>+</sup> 612.2848, found *m/z* 612.2844.

***N*-(*tert*-butyl)-2-(2'-(1-(*tert*-butyl)-1H-tetrazol-5-yl)-7'-methyl-1-oxo-3,4-dihydrospiro[benzo[*c*]azepine-5,3'-indolin]-2(1H)-yl)-2-phenylacetamide (±)-55**

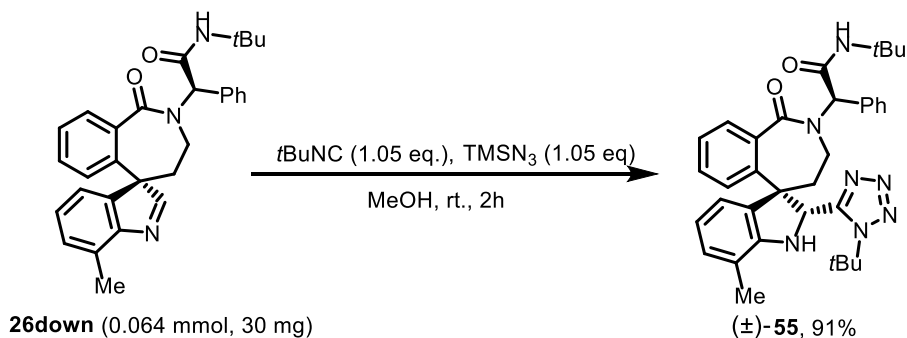



From **26down** (0.064 mmol scale, 30 mg)

Yellow solid, ( $\pm$ )-**55**, 34 mg, 91% yield, Rf = 0.4 (ethyl acetate/hexane = 30%);

$^1\text{H NMR}$  (400 MHz,  $\text{CDCl}_3$ )  $\delta$  7.86 – 7.79 (m, 1H), 7.54 (dd,  $J = 7.5, 1.7$  Hz, 2H), 7.42 (d,  $J = 6.6$  Hz, 3H), 7.25 – 7.18 (m, 1H), 7.16 – 7.07 (m, 2H), 6.95 (d,  $J = 7.3$  Hz, 1H), 6.82 (d,  $J = 7.3$  Hz, 1H), 6.74 (t,  $J = 7.5$  Hz, 1H), 6.40 (s, 1H), 5.52 (s, 1H), 5.23 (s, 1H), 3.99 (s, 1H), 3.73 (ddd,  $J = 15.5, 10.3, 1.8$  Hz, 1H), 3.51 (ddd,  $J = 15.8, 5.4, 2.4$  Hz, 1H), 2.14 (s, 3H), 2.10 – 1.98 (m, 1H), 1.93 – 1.83 (m, 1H), 1.44 (s, 9H), 1.35 (s, 9H) ppm;

$^{13}\text{C NMR}$  (100 MHz,  $\text{CDCl}_3$ )  $\delta$  171.0, 168.4, 154.7, 146.4, 136.6, 136.5, 136.2, 135.9, 132.3, 132.1, 130.2, 129.4, 129.3, 129.2, 129.0, 127.6, 121.9, 120.6, 120.2, 66.6, 62.2, 61.7, 61.0, 51.9, 45.7, 42.0, 30.5, 28.7, 16.7 ppm;

**HRMS (ESI)**  $m/z$  calcd for  $\text{C}_{35}\text{H}_{42}\text{N}_7\text{O}_2^+$  ( $\text{M}+\text{H}$ ) $^+$  592.3395, found  $m/z$  592.3392.

***N*-(*tert*-butyl)-2-(2'-(1-(*tert*-butyl)-1H-tetrazol-5-yl)-6'-fluoro-1-oxo-3,4-dihydrospiro[benzo[*c*]azepine-5,3'-indolin]-2(1H)-yl)-2-phenylacetamide ( $\pm$ )-56**

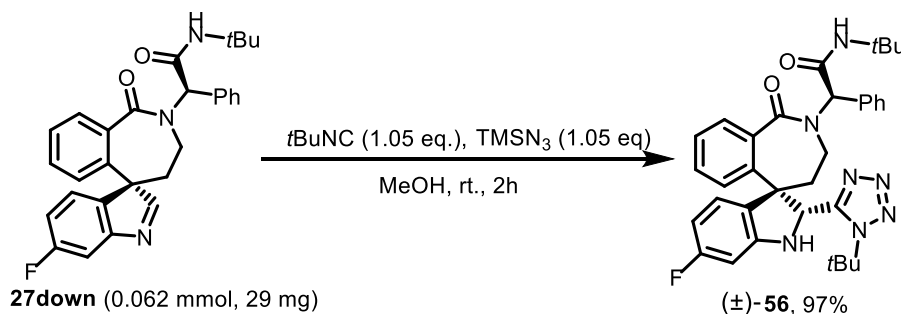

From **27down** (0.062 mmol scale, 29 mg)

Yellow solid, ( $\pm$ )-**56**, 36 mg, 97% yield, Rf = 0.4 (ethyl acetate/hexane = 30%);

$^1\text{H NMR}$  (400 MHz,  $\text{CDCl}_3$ )  $\delta$  7.79 (d,  $J = 7.6$  Hz, 1H), 7.53 (d,  $J = 6.8$  Hz, 2H), 7.44 (d,  $J = 6.4$  Hz, 3H), 7.26 (t,  $J = 3.9$  Hz, 1H), 7.22 (d,  $J = 7.5$  Hz, 1H), 7.20 – 7.12 (m, 1H), 6.95 (dd,  $J = 8.0, 5.6$  Hz, 1H), 6.49 (t,  $J = 8.7$  Hz, 1H), 6.40 (d,  $J = 9.3$  Hz, 1H), 6.35 (s, 1H), 5.52 (s, 1H), 5.25 (s, 1H), 4.22 (s, 1H), 3.74 – 3.62 (m, 1H), 3.53 (dd,  $J = 12.2, 3.7$  Hz, 1H), 2.06 – 1.88 (m, 2H), 1.47 (s, 9H), 1.35 (s, 9H) ppm;

$^{13}\text{C NMR}$  (100 MHz,  $\text{CDCl}_3$ )  $\delta$  171.0, 168.3, 163.35 (d,  $J = 243.6$  Hz), 154.0, 149.38 (d,  $J = 11.7$  Hz), 136.02, 135.74 (d,  $J = 3.3$  Hz), 132.48 (d,  $J = 2.6$  Hz), 132.08, 131.67, 130.35, 129.40, 129.24, 129.08, 127.84, 125.23 (d,  $J = 10.3$  Hz), 106.68 (d,  $J = 22.7$  Hz), 98.61 (d,  $J = 26.4$  Hz), 66.37, 62.25, 61.69, 59.62, 51.92, 45.29, 42.14, 30.46, 28.69 ppm;

$^{19}\text{F NMR}$  (376 MHz,  $\text{CDCl}_3$ )  $\delta$  -114.51 (td,  $J = 9.2, 5.4$  Hz) ppm;

**HRMS (ESI)**  $m/z$  calcd for  $\text{C}_{34}\text{H}_{39}\text{FN}_7\text{O}_2^+$  ( $\text{M}+\text{H}$ ) $^+$  596.3144, found  $m/z$  596.3146.

**2-(2'-(1-(*tert*-butyl)-1H-tetrazol-5-yl)-1-oxo-3,4-dihydrospiro[benzo[*c*]azepine-5,3'-indolin]-2(1H)-yl)-2-phenyl-*N*-(2,4,4-trimethylpentan-2-yl)acetamide ( $\pm$ )-57**

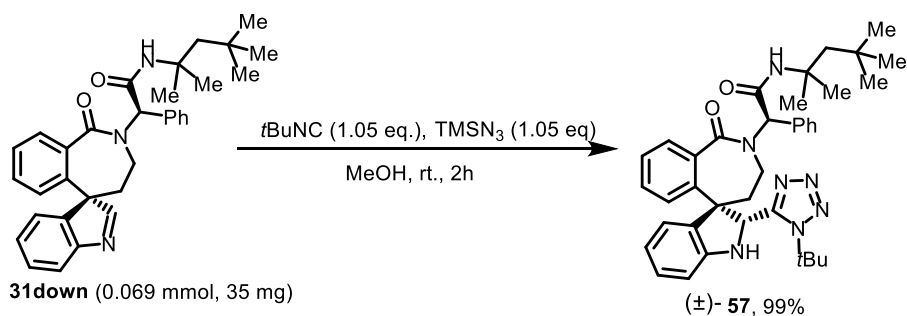

From **31down** (0.069 mmol scale, 35 mg)

White solid, (±)-**57**, 43 mg, 99% yield, R<sub>f</sub> = 0.4 (ethyl acetate/hexane = 30%);

**<sup>1</sup>H NMR** (400 MHz, CDCl<sub>3</sub>) δ 7.75 (dd, *J* = 7.5, 1.5 Hz, 1H), 7.59 – 7.55 (m, 2H), 7.42 (dt, *J* = 13.1, 6.5 Hz, 3H), 7.25 – 7.15 (m, 3H), 7.12 – 7.04 (m, 2H), 6.83 (t, *J* = 7.5 Hz, 1H), 6.68 (d, *J* = 7.8 Hz, 1H), 6.33 (s, 1H), 5.62 (s, 1H), 5.21 (s, 1H), 4.11 (s, 1H), 3.78 – 3.66 (m, 1H), 3.55 (dt, *J* = 15.5, 3.6 Hz, 1H), 2.12 – 1.94 (m, 2H), 1.72 (d, *J* = 4.8 Hz, 2H), 1.48 (s, 9H), 1.44 (s, 3H), 1.40 (s, 3H), 0.93 (s, 9H) ppm;

**<sup>13</sup>C NMR** (100 MHz, CDCl<sub>3</sub>) δ 171.1, 167.9, 154.1, 147.7, 136.8, 135.9, 135.9, 135.6, 131.8, 130.3, 129.6, 129.2, 129.0, 128.2, 127.7, 124.6, 120.4, 111.0, 65.5, 62.1, 62.0, 60.1, 55.9, 52.5, 45.1, 42.4, 31.6, 31.4, 30.5, 29.0, 28.5 ppm;

**HRMS (ESI)** *m/z* calcd for C<sub>38</sub>H<sub>48</sub>N<sub>7</sub>O<sub>2</sub><sup>+</sup> (M+H)<sup>+</sup> 634.3864, found *m/z* 634.3860.

## 8. Biological experiments

### 8.1 Antitumor activity test of some dearomatization products

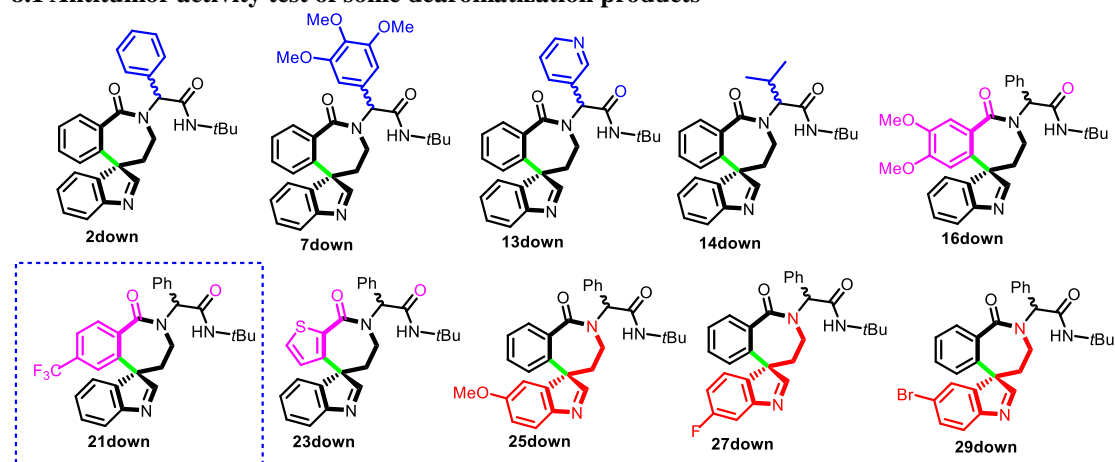

**Selected compounds (renumbered sequentially as a, b, c, d, e, f, g, h, i, j for simplicity)**

The anti-tumor activity of the benzazepine spiroindole compounds synthesized in examples **a-j** was assayed using human-derived tumor cell lines A549, MCF7, HELA, HEPG2, and HCT116, which were purchased from the American Type Culture Collection (ATCC). The experimental steps were as follows.

#### (1) Routine culture of cells.

A549, MCF7, HELA, HEPG2, HCT116 cells were inoculated in DMEM culture medium containing 10% fetal bovine serum (FBS), cultured and passaged at 37 °C, 5% CO<sub>2</sub> and saturated humidity. Leave the cells in logarithmic growth phase for experiments.

(2) Cell spreading plate

A549, MCF7, HELA, HEPG2 and HCT116 cells in the logarithmic growth phase were digested 24 h before drug treatment, prepared into cell suspensions, counted, and the cell concentration was adjusted to  $1 \times 10^5$ /ml, and the cells were inoculated into 96-well plates with approximately  $2 \times 10^4$  cells per well, and the cells were incubated in an incubator.

(3) Drug treatment

Examples **a-j** were diluted with the complete medium corresponding to the cells to a compound concentration of 20  $\mu$ M and added to each well of a 96-well plate, respectively, with 3 replicate wells for each compound. Controls were equal volume of DMSO with the compounds and the cells were placed back into the cell culture incubator for 72 hours.

(4) CCK8 assay results

- 1) Incubate the plate in the incubator for 72h, and then use an enzyme marker and perform the assay at absorbance value 450nm.
- 2) Add 10  $\mu$ l of CCK8 solution to each well (be careful not to create air bubbles in the wells, it will affect the reading).
- 3) Place the plate in an incubator and incubate for 2h.
- 4) Readings were taken at 450 nm and the results were as follows.

The cell viability of the benzazepinespiroindole compounds in examples **a-j** against each tumor cell is shown below.

| Example | 72h cell viability of 20 $\mu$ M compound (%) |        |       |       |        |
|---------|-----------------------------------------------|--------|-------|-------|--------|
|         | A549                                          | MCF7   | HELA  | HEPG2 | HCT116 |
| 1       | 93.03                                         | 99.09  | 87.20 | 83.05 | 108.84 |
| 2       | 94.77                                         | 110.24 | 87.48 | 75.06 | 109.93 |
| 3       | 89.04                                         | 78.15  | 85.65 | 56.16 | 80.50  |
| 4       | 89.89                                         | 90.66  | 88.39 | 71.65 | 91.40  |
| 5       | 91.79                                         | 88.06  | 89.04 | 59.51 | 92.37  |
| 6       | 79.91                                         | 3.96   | 82.80 | 44.44 | 12.13  |
| 7       | 94.07                                         | 90.12  | 87.15 | 62.60 | 90.74  |
| 8       | 93.07                                         | 99.22  | 88.57 | 68.76 | 101.39 |
| 9       | 96.35                                         | 91.18  | 98.33 | 44.57 | 96.58  |
| 10      | 89.84                                         | 6.48   | 78.45 | 30.76 | 11.89  |

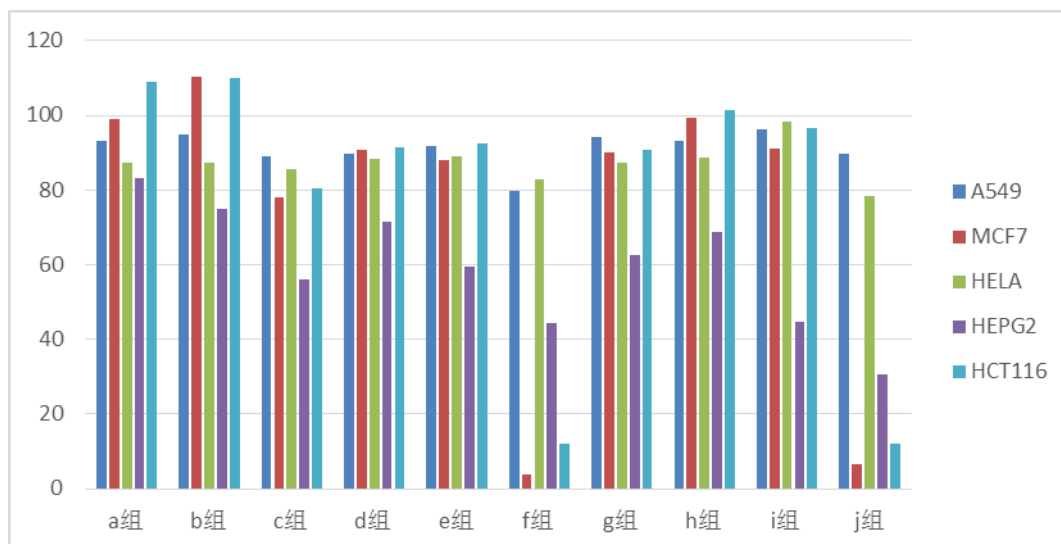

## 8.2 Antitumor activity and IC<sub>50</sub> test assay of **21down**

### (1) Conventional culture of cells

To test the effect of different concentrations of **21down** on the viability of breast cancer cells (MCF7), MCF7 cells were inoculated in DMEM culture medium with 10% FBS, cultured and passaged at 37 °C, 5% CO<sub>2</sub> and saturated humidity, and then used for experiments when the cells were in logarithmic growth phase.

### (2) Cell spreading

The MCF7 cells in the growth phase were digested 24 h before drug treatment, prepared into cell suspension, and counted, and the cell concentration was adjusted to 1x10<sup>5</sup>/mL.

### (3) Drug treatment

After cell apposition, compound **21down** was added to a final concentration of 0 μM, 1.25 μM, 2.5 μM, 5 μM, 10 μM, 20 μM. After 72 h of compound treatment, the cells were detected at an absorbance value of 450 nm using an enzyme marker, 10 ul of CCK solution was added to each well (be careful not to create bubbles in the wells), and the plate was placed. The results are shown below. The viability of breast cancer cells decreased significantly with the increase of compound concentration, indicating that the benzazepine spirodihydroindole compound **21down** has certain inhibitory activity on breast cancer tumor cells. The IC<sub>50</sub> of the benzodiazepine spirodihydroindole **21down** was 5.28 μM against breast cancer cells MCF7 as shown below.

|      | Group            | 1.25uM | 2.5uM  | 5uM    | 10uM   | 20uM   | Contrast | Blank |
|------|------------------|--------|--------|--------|--------|--------|----------|-------|
| MCF7 | OD value 1       | 0.713  | 0.75   | 0.55   | 0.434  | 0.301  | 0.891    | 0.172 |
|      | OD value 2       | 0.834  | 0.771  | 0.522  | 0.37   | 0.266  | 0.891    | 0.175 |
|      | OD value 3       | 0.766  | 0.701  | 0.514  | 0.4    | 0.292  | 0.944    | 0.167 |
|      | OD mean value    | 0.771  | 0.741  | 0.529  | 0.401  | 0.286  | 0.909    | 0.171 |
|      | Cell viability % | 81.329 | 77.215 | 48.463 | 31.193 | 15.597 |          |       |

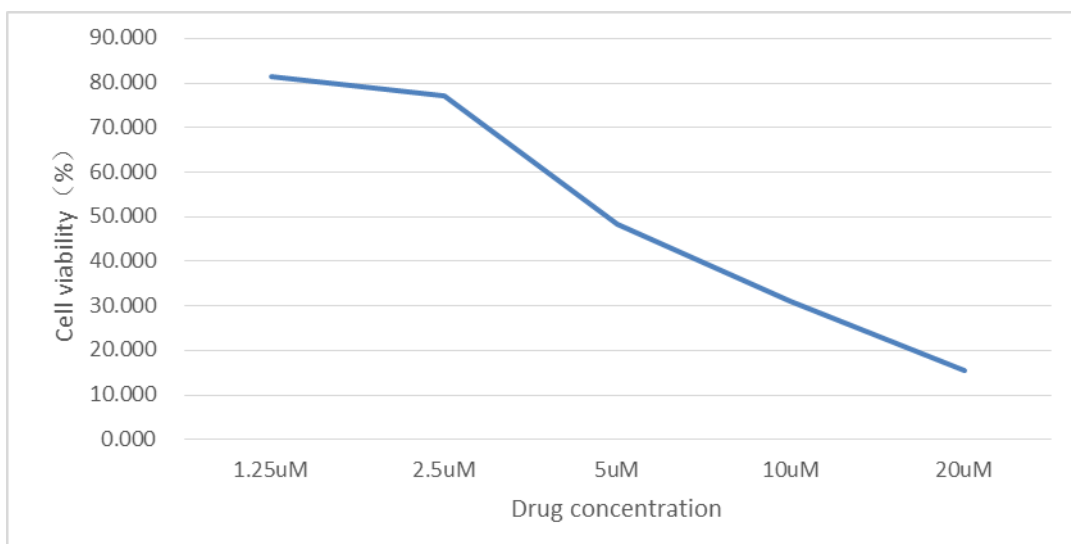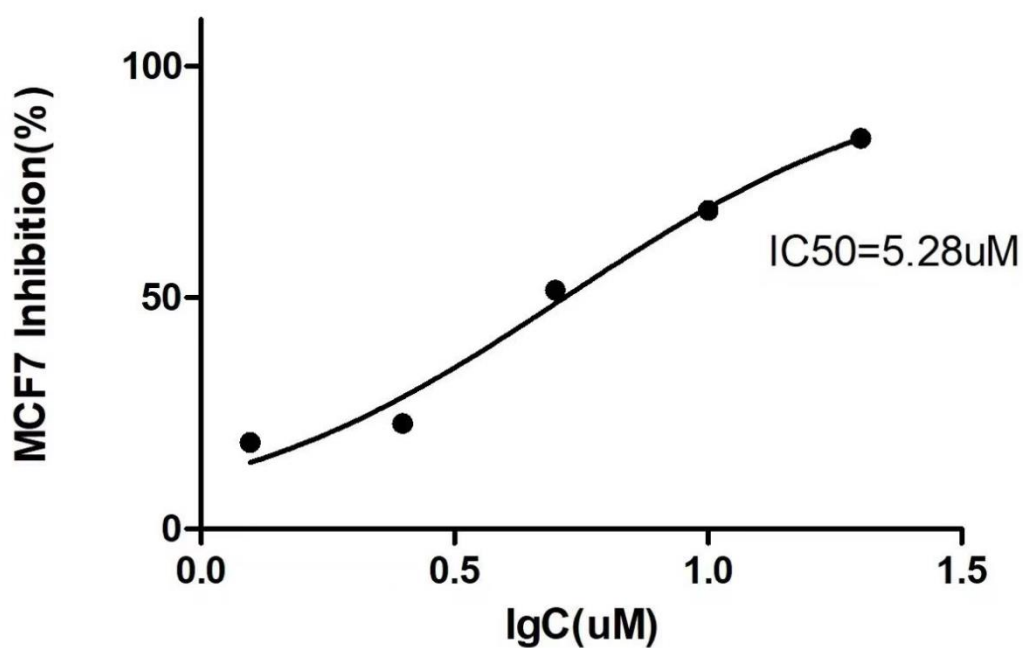

### 8.3 Flow cytometry experiments

The effect of compound **21down** on apoptosis of breast cancer cells (MCF7) was detected by flow cytometry on cultured tumor cells using a flow cytometer made by Beckman coulter and an apoptosis detection kit (Annexin V-FITC/PI) made by YEASEN. The cells were treated with 0  $\mu$ M, 1.25  $\mu$ M, 2.5  $\mu$ M, 5  $\mu$ M, 10  $\mu$ M and 20  $\mu$ M of **21down**, and then immediately assayed on the machine, each repeated three times, and a total of 18 samples were collected, and the statistical graphs are shown below.

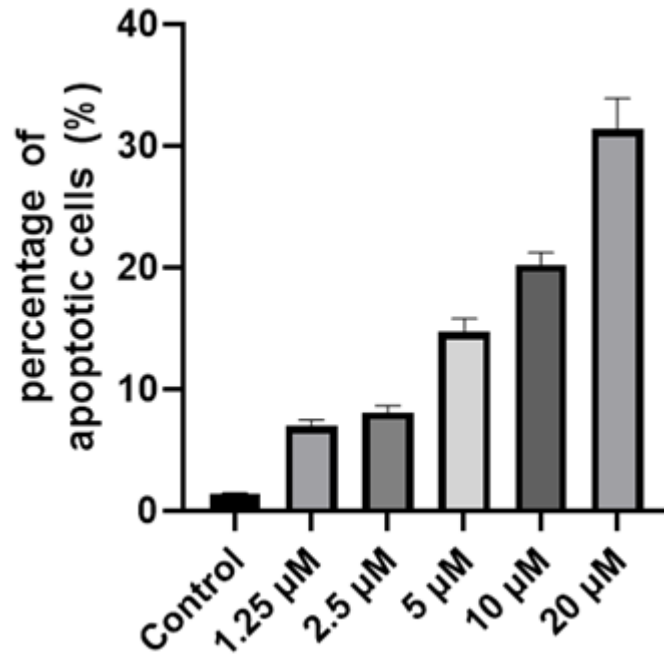

The data showed that the higher the concentration of drug, the more apoptotic cells; the flow cytogram showed that the percentage of cells in the Q2+Q3 quadrant increased with the increase of drug concentration. The flow cytogram shows that the proportion of cells in the Q2+Q3 quadrant increased with increasing drug concentration, which means that the number of apoptotic cells also increased with increasing drug concentration.

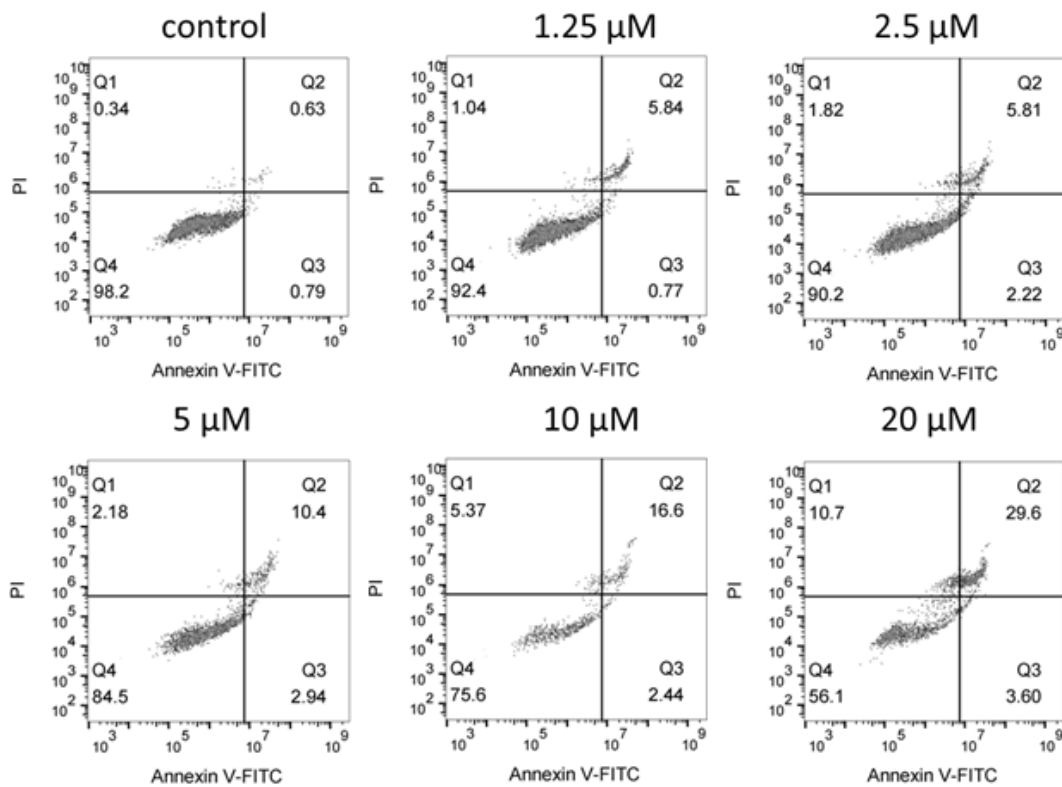

In conclusion, the benzodiazepine spirodihydroindole compounds herein may be applied in the

preparation of antitumor drugs, especially they can be used in the preparation of drugs against breast cancer.

## 9. Mechanistic Studies and Computational Details of Mechanistic Studies

All calculations in this work were performed using Gaussian 09 program package<sup>1</sup>. Full geometry optimizations were performed to locate all the stationary points, using the B3LYP method<sup>2</sup> with the def2svp\*\*<sup>3-4</sup> basis, namely B3LYP/ def2svp\*\*. Dispersion corrections were computed with Grimme's D3(BJ) method in optimization<sup>5</sup>. The intrinsic reaction coordinate (IRC) path was traced to check the energy profiles connecting each transition state to two associated minima of the proposed mechanism<sup>6</sup>. Harmonic vibrational frequency was performed at the same level to guarantee that there is no imaginary frequency in the molecules, i.e. they locate on the minima of potential energy surface. Convergence parameters of the default threshold were retained (maximum force within  $4.5 \times 10^{-4}$  Hartrees/Bohr and root mean square (RMS) force within  $3.0 \times 10^{-4}$  Hartrees/Radian) to obtain the optimized structure. The optimal structure was identified given that all calculations for structural optimization were successfully converged within the convergence threshold of no imaginary frequency, during the process of vibration analysis.

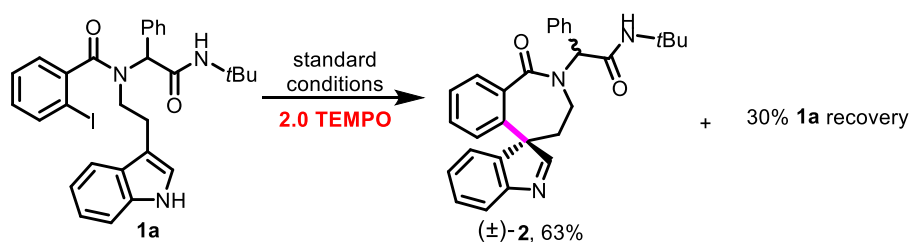

Ugi products **1a** (0.1 mmol, 58 mg), Pd(OAc)<sub>2</sub> (0.005 mmol, 1.1 mg, 0.05 eq), Ph<sub>3</sub>P (0.01 mmol, 2.6 mg, 0.1 eq), K<sub>2</sub>CO<sub>3</sub> (0.2 mmol, 28 mg, 2.0 eq), and 2,2,6,6-tetramethylpiperidine 1-oxyl (0.2 mmol, 31 mg) were added to a flame-dried Schlenk flask containing a stirring bar and purged by evacuating the flask and backfilling with N<sub>2</sub> three times. Then, anhydrous *o*-DCB (1 ml) was added and the flask was sealed. The reaction mixture was stirred at 120 °C for 16 h and monitored by TLC. Then the reaction mixture is subjected to wet loading and column chromatography to obtain the target product (±)-**2** (28 mg, dr = 5/1, 63%) and **1a** (17 mg, 30% recovery) over silica gel using EtOAc/ n-hexane = 20%~30% as eluent.

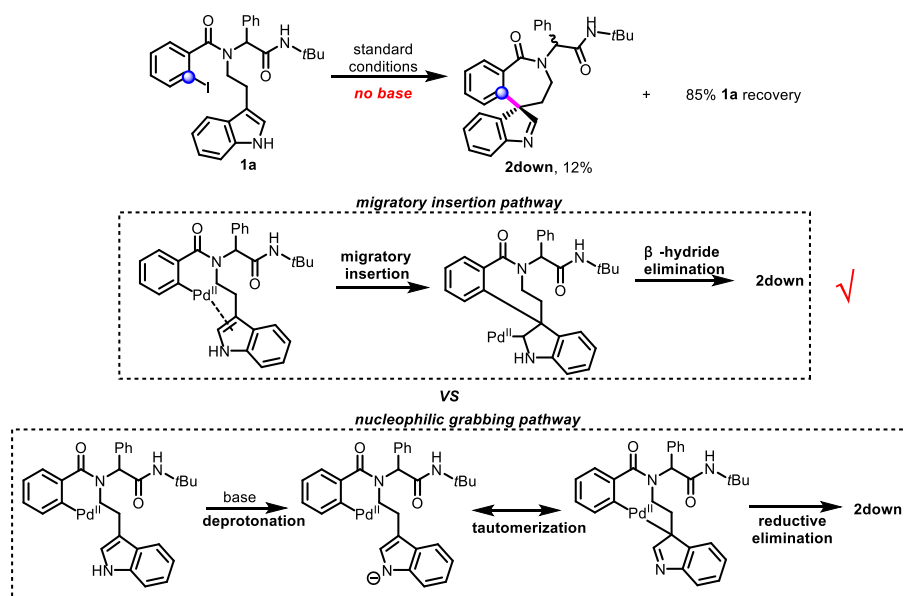

Ugi products **1a** (0.1 mmol, 58 mg), Pd(OAc)<sub>2</sub> (0.005 mmol, 1.1 mg, 0.05 eq), and Ph<sub>3</sub>P (0.01 mmol, 2.6 mg, 0.1 eq) were added to a flame-dried Schlenk flask containing a stirring bar and purged by evacuating the flask and backfilling with N<sub>2</sub> three times. Then, anhydrous *o*-DCB (1 ml) was added and the flask was sealed. The reaction mixture was stirred at 120 °C for 16 h and monitored by TLC. Then the reaction mixture is subjected to wet loading and column chromatography to obtain the target product **2down** (5 mg, 12%), trace amount of **2up**, and **1a** (49 mg, 85% recovery) over silica gel using EtOAc/ n-hexane = 20%~30% as eluent.

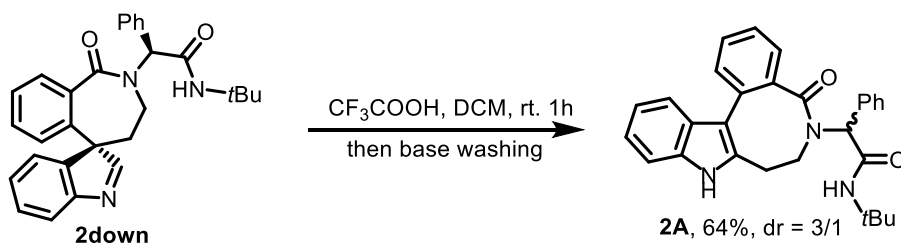

To a solution of indolenine **2down** (0.1 mmol, 45 mg) in CH<sub>2</sub>Cl<sub>2</sub> (1 mL) was added trifluoroacetic acid (0.4 mmol, 46 mg). This was allowed to stir for 1h at ambient temperature. The reaction mixture was diluted with CH<sub>2</sub>Cl<sub>2</sub> (10 mL), washed with sat. NaHCO<sub>3</sub> (10 mL) and brine. The organic layer was concentrated in vacuo. The residue was purified by flash column chromatography to give the product **2A** (30 mg, 64%, dr = 3/1).

This <sup>1</sup>H NMR and DEPT spectrum are similar to the **2A** spectrum obtained in the aforementioned condition screening.



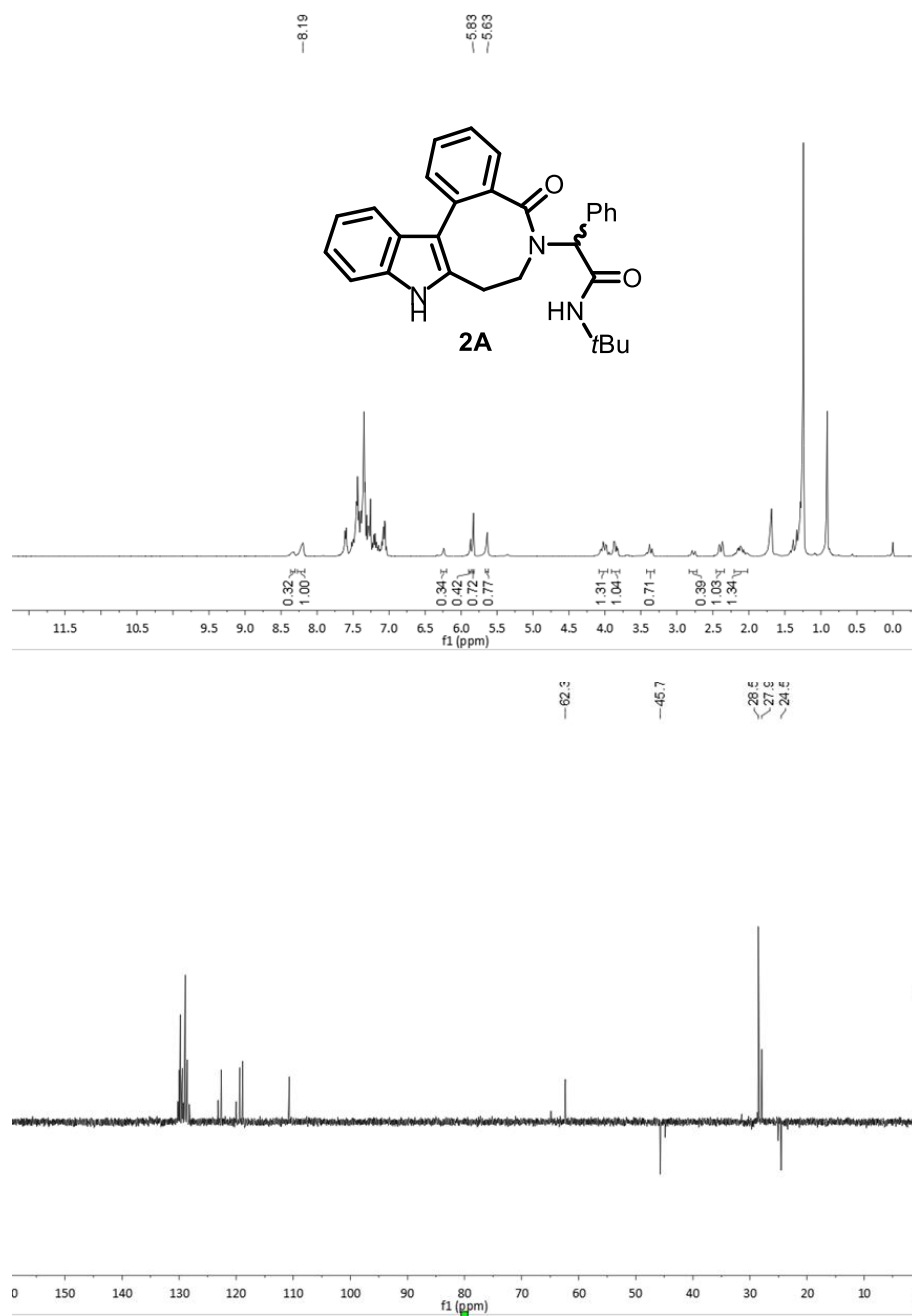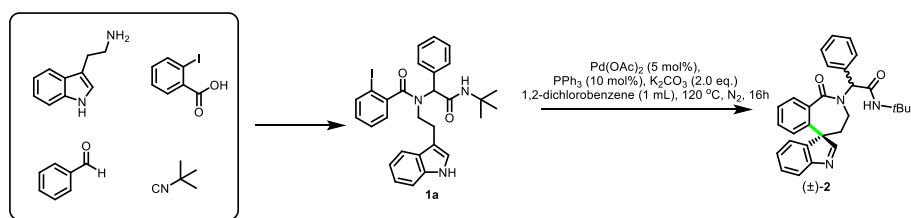

**Scheme S1.** Modeled reaction conditions

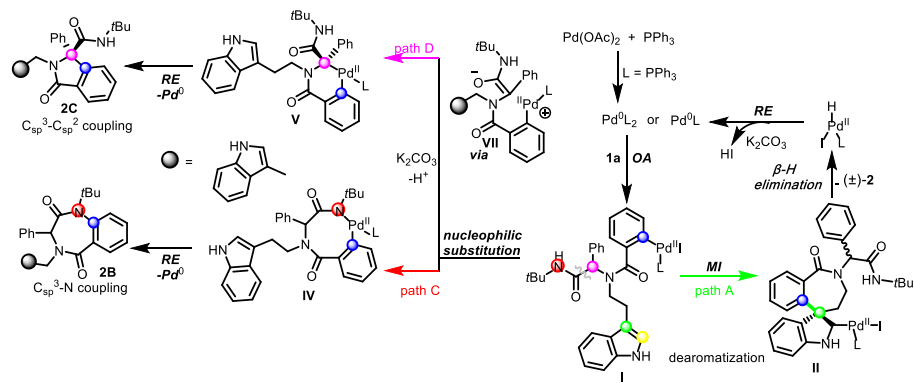

Figure S1. Proposed mechanism

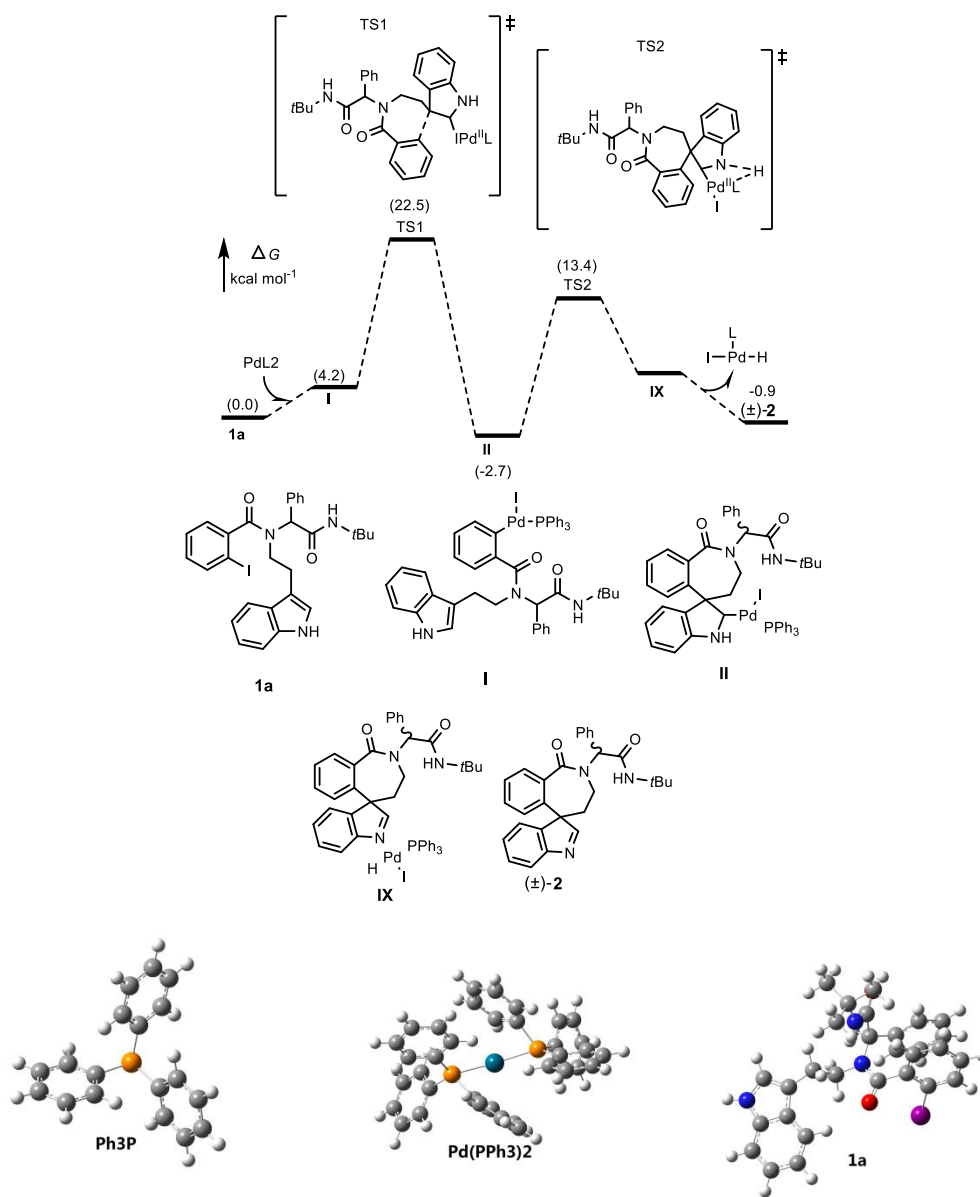

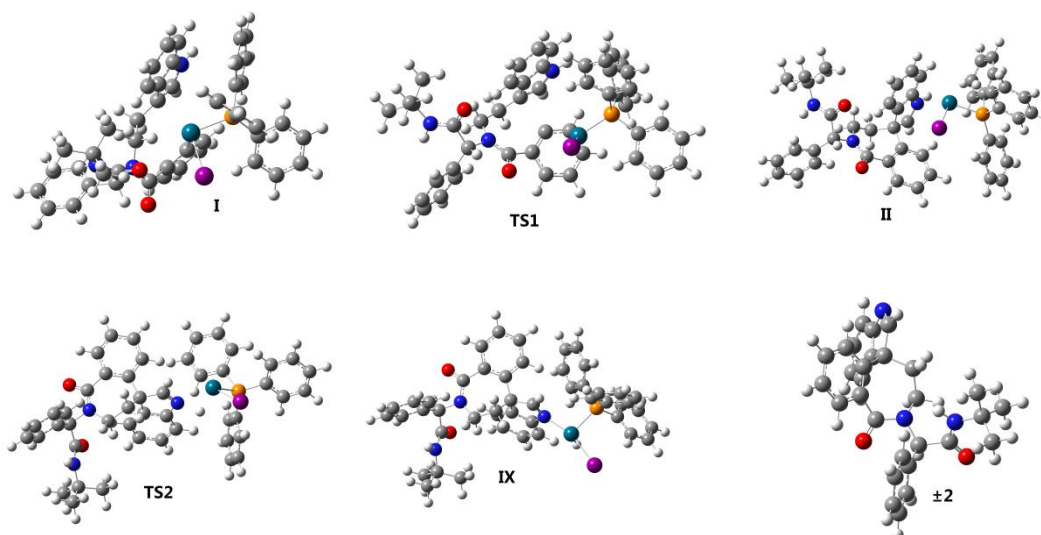

**Figure S2.** Computed Gibbs free energy (in kcal/mol) for path A and the optimized structures

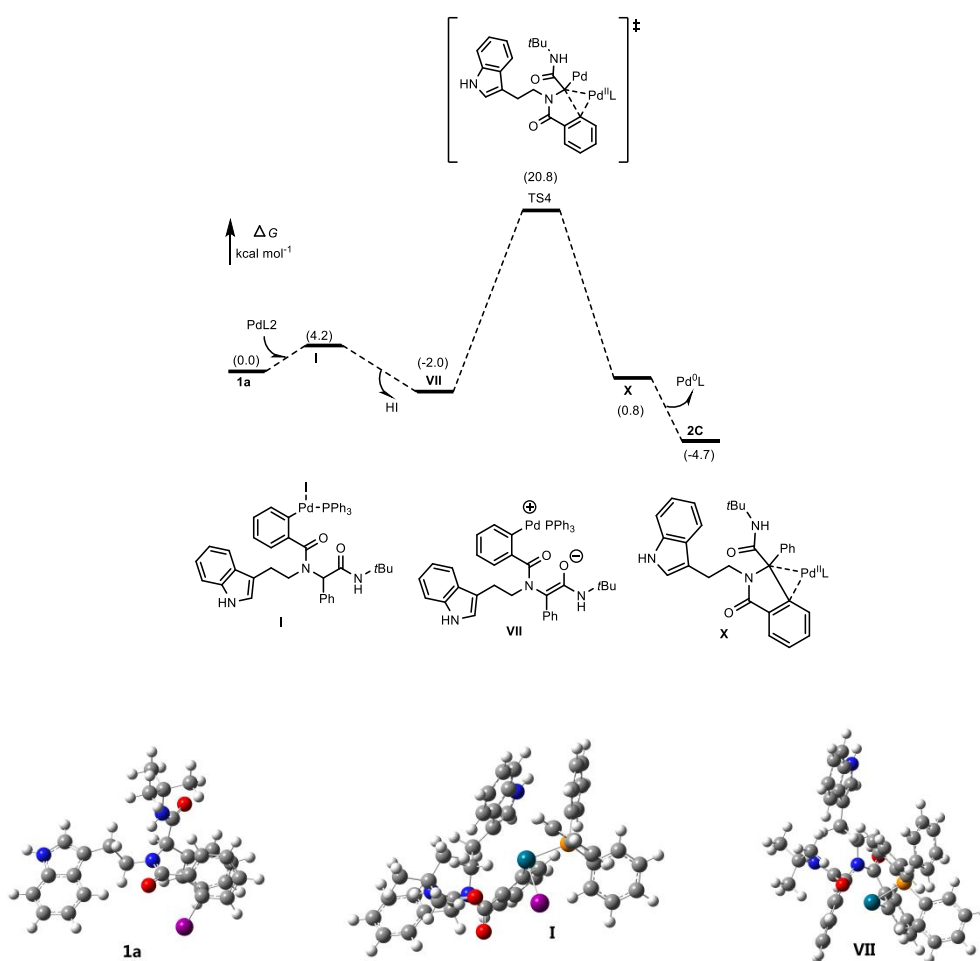

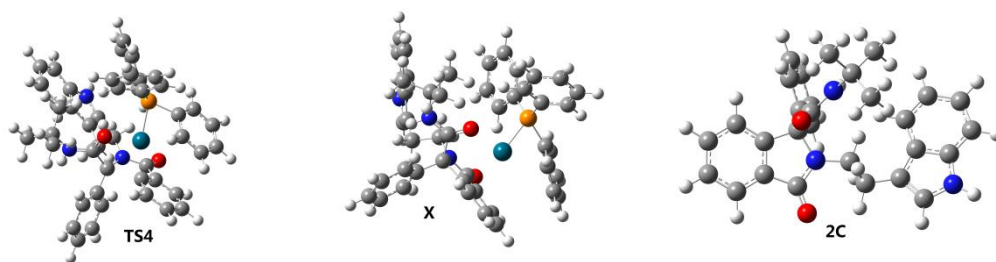

**Figure S3.** Computed Gibbs free energy (in kcal/mol) for path D and the optimized structures

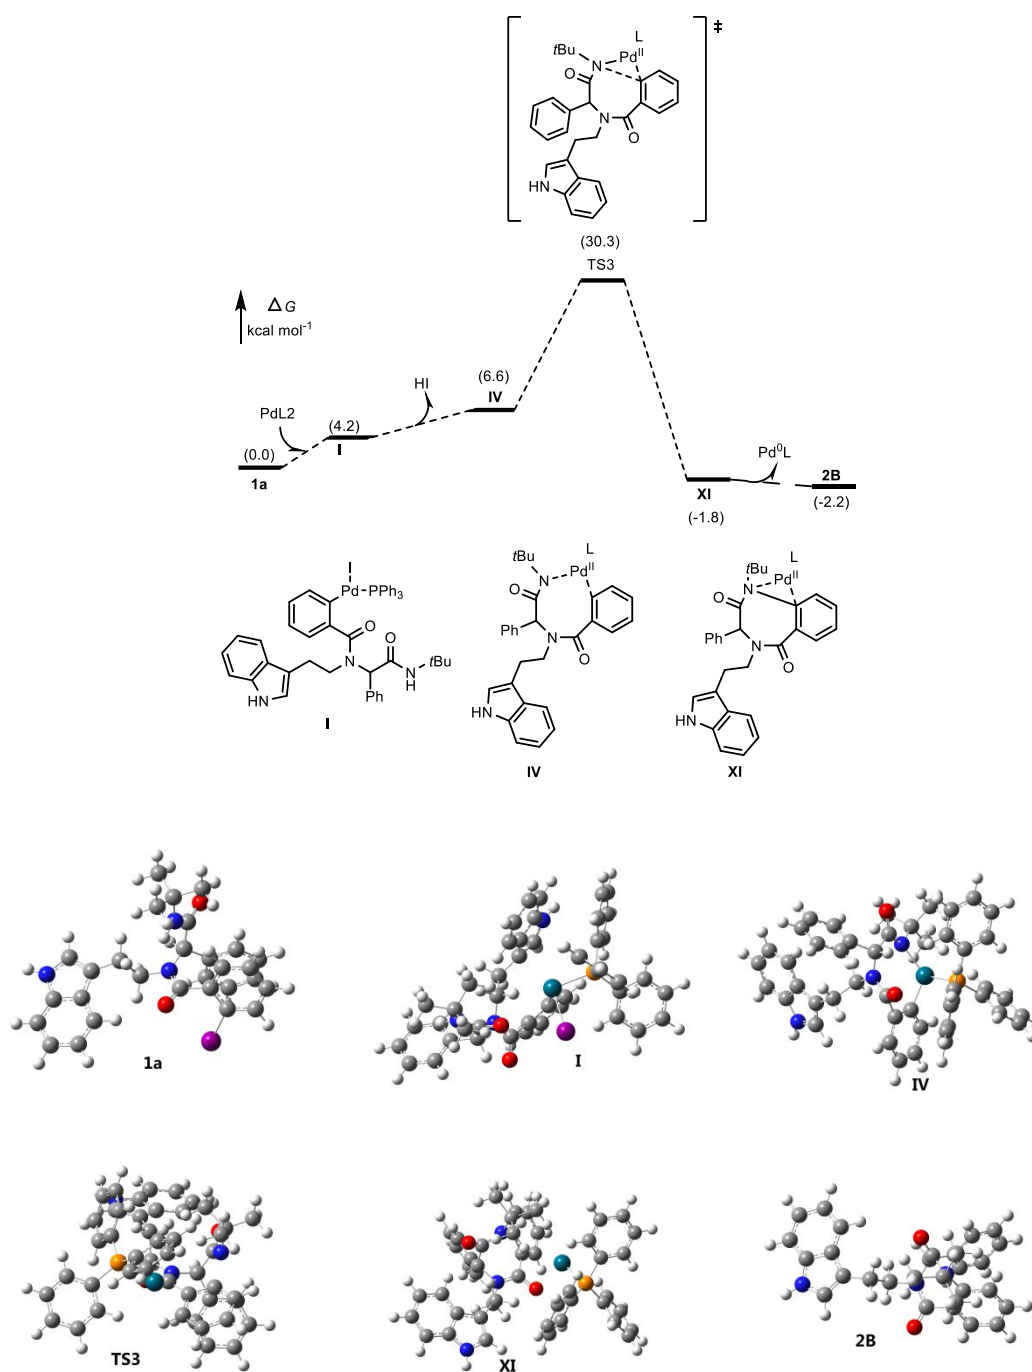

**Figure S4.** Computed Gibbs free energy (in kcal/mol) for path C and the optimized structures

**Table S2.** Computed energies and Cartesian coordinates of all species

**Ph<sub>3</sub>P**

|   |             |             |             |
|---|-------------|-------------|-------------|
| P | -0.00030000 | 0.00000000  | -1.25650000 |
| C | -1.56750000 | -0.53470000 | -0.43660000 |
| C | -1.62040000 | -1.38070000 | 0.68230000  |
| C | -2.77170000 | -0.06200000 | -0.98790000 |
| C | -2.85100000 | -1.74020000 | 1.24080000  |
| H | -0.69670000 | -1.76080000 | 1.12250000  |
| C | -3.99970000 | -0.41050000 | -0.42140000 |
| H | -2.74420000 | 0.58810000  | -1.86740000 |
| C | -4.04210000 | -1.25300000 | 0.69490000  |
| H | -2.87740000 | -2.40130000 | 2.11110000  |
| H | -4.92710000 | -0.03000000 | -0.85730000 |
| H | -5.00260000 | -1.53340000 | 1.13460000  |
| C | 0.31970000  | 1.62510000  | -0.43740000 |
| C | -0.38540000 | 2.09340000  | 0.68230000  |
| C | 1.33030000  | 2.43210000  | -0.98930000 |
| C | -0.07890000 | 3.33760000  | 1.24280000  |
| H | -1.17520000 | 1.48310000  | 1.12390000  |
| C | 1.64410000  | 3.66880000  | -0.42200000 |
| H | 1.87910000  | 2.08390000  | -1.86930000 |
| C | 0.93740000  | 4.12620000  | 0.69570000  |
| H | -0.63680000 | 3.69010000  | 2.11430000  |
| H | 2.43690000  | 4.28180000  | -0.85860000 |
| H | 1.17620000  | 5.09760000  | 1.13610000  |
| C | 1.24690000  | -1.08920000 | -0.43620000 |
| C | 2.00280000  | -0.71410000 | 0.68570000  |
| C | 1.44280000  | -2.36670000 | -0.99020000 |
| C | 2.92880000  | -1.60090000 | 1.24430000  |
| H | 1.86730000  | 0.27370000  | 1.12980000  |
| C | 2.35810000  | -3.25650000 | -0.42400000 |
| H | 0.86810000  | -2.66690000 | -1.87130000 |
| C | 3.10620000  | -2.87400000 | 0.69480000  |
| H | 3.51120000  | -1.29530000 | 2.11740000  |
| H | 2.49450000  | -4.24830000 | -0.86270000 |
| H | 3.82900000  | -3.56620000 | 1.13410000  |

**Pd(Ph<sub>3</sub>P)<sub>2</sub>**

|    |             |             |            |
|----|-------------|-------------|------------|
| Pd | 0.00250000  | -0.41490000 | 0.02340000 |
| P  | -2.29560000 | -0.15180000 | 0.29720000 |
| C  | -3.37620000 | -1.56390000 | 0.57360000 |

|   |             |             |             |
|---|-------------|-------------|-------------|
| C | -4.07840000 | -1.71150000 | 1.78250000  |
| C | -3.52210000 | -2.50820000 | -0.45740000 |
| C | -4.92740000 | -2.80650000 | 1.95030000  |
| H | -3.96860000 | -0.97440000 | 2.58050000  |
| C | -4.37820000 | -3.59520000 | -0.27920000 |
| H | -2.97210000 | -2.39020000 | -1.39400000 |
| C | -5.07700000 | -3.74500000 | 0.92360000  |
| H | -5.47610000 | -2.92600000 | 2.88700000  |
| H | -4.49610000 | -4.33060000 | -1.07790000 |
| H | -5.74330000 | -4.59930000 | 1.06250000  |
| C | -3.14340000 | 1.20880000  | -0.51070000 |
| C | -4.53180000 | 1.17990000  | -0.72030000 |
| C | -2.37460000 | 2.29500000  | -0.96960000 |
| C | -5.14800000 | 2.25120000  | -1.36900000 |
| H | -5.12510000 | 0.33120000  | -0.37510000 |
| C | -3.00250000 | 3.36180000  | -1.61040000 |
| H | -1.29220000 | 2.30110000  | -0.82350000 |
| C | -4.38780000 | 3.34000000  | -1.80930000 |
| H | -6.22810000 | 2.23660000  | -1.52940000 |
| H | -2.40990000 | 4.20850000  | -1.96310000 |
| H | -4.87710000 | 4.17500000  | -2.31570000 |
| C | -1.46640000 | 0.35380000  | 1.82620000  |
| C | -1.41030000 | 1.67170000  | 2.32570000  |
| C | -0.54110000 | -0.63010000 | 2.30840000  |
| C | -0.47720000 | 1.99050000  | 3.30390000  |
| H | -2.10150000 | 2.42670000  | 1.94790000  |
| C | 0.41290000  | -0.26690000 | 3.28540000  |
| H | -0.68670000 | -1.69100000 | 2.07210000  |
| C | 0.44410000  | 1.03080000  | 3.77220000  |
| H | -0.45200000 | 3.00320000  | 3.71230000  |
| H | 1.10240000  | -1.02270000 | 3.66580000  |
| H | 1.17630000  | 1.31290000  | 4.53100000  |
| P | 2.30100000  | -0.17760000 | -0.28440000 |
| C | 3.38340000  | -1.59020000 | -0.54390000 |
| C | 3.88090000  | -1.90930000 | -1.81850000 |
| C | 3.73490000  | -2.36510000 | 0.57580000  |
| C | 4.73390000  | -3.00460000 | -1.96480000 |
| H | 3.61120000  | -1.30320000 | -2.68540000 |
| C | 4.59360000  | -3.45230000 | 0.41730000  |
| H | 3.33840000  | -2.11580000 | 1.56360000  |
| C | 5.09020000  | -3.77260000 | -0.85150000 |
| H | 5.12670000  | -3.25500000 | -2.95260000 |
| H | 4.87270000  | -4.05480000 | 1.28430000  |
| H | 5.76030000  | -4.62660000 | -0.97290000 |

|   |             |             |             |
|---|-------------|-------------|-------------|
| C | 3.16840000  | 1.21140000  | 0.45340000  |
| C | 4.57060000  | 1.29060000  | 0.43240000  |
| C | 2.40400000  | 2.21980000  | 1.06870000  |
| C | 5.20080000  | 2.39050000  | 1.01650000  |
| H | 5.16240000  | 0.50310000  | -0.03830000 |
| C | 3.04540000  | 3.31500000  | 1.64580000  |
| H | 1.31530000  | 2.14040000  | 1.09830000  |
| C | 4.44210000  | 3.39950000  | 1.61990000  |
| H | 6.29040000  | 2.46080000  | 0.99920000  |
| H | 2.45590000  | 4.09950000  | 2.12490000  |
| H | 4.94300000  | 4.25550000  | 2.07750000  |
| C | 1.43430000  | 0.29580000  | -1.80150000 |
| C | 1.35370000  | 1.61630000  | -2.29480000 |
| C | 0.50870000  | -0.69470000 | -2.26910000 |
| C | 0.39840000  | 1.92940000  | -3.25210000 |
| H | 2.04230000  | 2.37810000  | -1.92560000 |
| C | -0.46430000 | -0.33810000 | -3.22980000 |
| H | 0.66570000  | -1.75330000 | -2.03370000 |
| C | -0.51990000 | 0.96120000  | -3.70940000 |
| H | 0.35180000  | 2.94450000  | -3.65240000 |
| H | -1.15090000 | -1.10000000 | -3.60330000 |
| H | -1.26910000 | 1.23870000  | -4.45300000 |

**1a**

|   |             |             |             |
|---|-------------|-------------|-------------|
| C | -4.59410000 | -0.53690000 | 0.01990000  |
| C | -5.91800000 | -0.63790000 | -0.50510000 |
| C | -6.80040000 | -1.64960000 | -0.09910000 |
| C | -6.34030000 | -2.56590000 | 0.84430000  |
| C | -5.03240000 | -2.48220000 | 1.37440000  |
| C | -4.15500000 | -1.47860000 | 0.97210000  |
| C | -3.97610000 | 0.60990000  | -0.60620000 |
| C | -4.92040000 | 1.13770000  | -1.46180000 |
| H | -7.81150000 | -1.71550000 | -0.50800000 |
| H | -7.00420000 | -3.36680000 | 1.18020000  |
| H | -4.70650000 | -3.22130000 | 2.11080000  |
| H | -3.14040000 | -1.42060000 | 1.37480000  |
| H | -4.85220000 | 2.00510000  | -2.11680000 |
| H | -6.92350000 | 0.58390000  | -1.93060000 |
| N | -6.08120000 | 0.39420000  | -1.40050000 |
| C | -2.57660000 | 1.08510000  | -0.36670000 |
| H | -2.40690000 | 1.18570000  | 0.71860000  |
| H | -2.42960000 | 2.07990000  | -0.81420000 |
| C | -1.52680000 | 0.10390000  | -0.91670000 |
| H | -1.79480000 | -0.91660000 | -0.61690000 |

|   |             |             |             |
|---|-------------|-------------|-------------|
| H | -1.51950000 | 0.14060000  | -2.01470000 |
| C | 2.42120000  | -1.37790000 | 1.09380000  |
| C | 1.62540000  | -0.22400000 | 1.18830000  |
| C | 2.17260000  | 0.91460000  | 1.79620000  |
| C | 3.48850000  | 0.91850000  | 2.26100000  |
| C | 4.27830000  | -0.22410000 | 2.12260000  |
| C | 3.74370000  | -1.37800000 | 1.54290000  |
| H | 1.56200000  | 1.81120000  | 1.89480000  |
| H | 3.89640000  | 1.81880000  | 2.72580000  |
| H | 5.31370000  | -0.22780000 | 2.47120000  |
| H | 4.35520000  | -2.27560000 | 1.44110000  |
| C | 0.18350000  | -0.25080000 | 0.74130000  |
| N | -0.15840000 | 0.35170000  | -0.44460000 |
| O | -0.64640000 | -0.83410000 | 1.42890000  |
| C | 0.72640000  | 1.17660000  | -1.28410000 |
| H | 0.16350000  | 1.30750000  | -2.22050000 |
| C | 2.02280000  | 0.47980000  | -1.69020000 |
| C | 3.29880000  | 0.92250000  | -1.31970000 |
| C | 1.91230000  | -0.67990000 | -2.46970000 |
| C | 4.43480000  | 0.20730000  | -1.70370000 |
| H | 3.41040000  | 1.82760000  | -0.72680000 |
| C | 3.04710000  | -1.39370000 | -2.86000000 |
| H | 0.92230000  | -1.03760000 | -2.76320000 |
| C | 4.31540000  | -0.95380000 | -2.47320000 |
| H | 5.42140000  | 0.55960000  | -1.39270000 |
| H | 2.93720000  | -2.30070000 | -3.45920000 |
| H | 5.20650000  | -1.51240000 | -2.76990000 |
| C | 0.90400000  | 2.64180000  | -0.81690000 |
| O | 1.65290000  | 3.38580000  | -1.43890000 |
| N | 0.13980000  | 3.02660000  | 0.22810000  |
| C | 0.05400000  | 4.39220000  | 0.78930000  |
| C | -0.91660000 | 4.30870000  | 1.97220000  |
| H | -1.02420000 | 5.29540000  | 2.44620000  |
| H | -1.91590000 | 3.97770000  | 1.64650000  |
| H | -0.55000000 | 3.60300000  | 2.73500000  |
| C | -0.48720000 | 5.35960000  | -0.27400000 |
| H | -1.48370000 | 5.03970000  | -0.61790000 |
| H | -0.57790000 | 6.37430000  | 0.14380000  |
| H | 0.18610000  | 5.39780000  | -1.14130000 |
| C | 1.43630000  | 4.84690000  | 1.28070000  |
| H | 2.15610000  | 4.87000000  | 0.45210000  |
| H | 1.36760000  | 5.85590000  | 1.71570000  |
| H | 1.81720000  | 4.16530000  | 2.05730000  |
| I | 1.65330000  | -3.18280000 | 0.26100000  |



|          |             |             |             |
|----------|-------------|-------------|-------------|
| H        | -0.47700000 | 2.33190000  | 0.63060000  |
| <b>I</b> |             |             |             |
| C        | 0.00850000  | 2.10850000  | 1.97880000  |
| C        | -1.18870000 | 2.56810000  | 2.58730000  |
| C        | -1.63130000 | 3.88580000  | 2.48130000  |
| C        | -0.83570000 | 4.76680000  | 1.74450000  |
| C        | 0.36270000  | 4.33870000  | 1.14250000  |
| C        | 0.79700000  | 3.01730000  | 1.25190000  |
| C        | 0.13100000  | 0.68280000  | 2.30220000  |
| C        | -1.00960000 | 0.38320000  | 3.09370000  |
| H        | -2.55660000 | 4.21410000  | 2.95530000  |
| H        | -1.14740000 | 5.80800000  | 1.64010000  |
| H        | 0.96580000  | 5.05400000  | 0.57940000  |
| H        | 1.72670000  | 2.71100000  | 0.77360000  |
| H        | -1.27550000 | -0.56390000 | 3.56010000  |
| H        | -2.63910000 | 1.51300000  | 3.76140000  |
| N        | -1.75940000 | 1.48190000  | 3.25110000  |
| C        | 1.42030000  | -0.10360000 | 2.30650000  |
| H        | 1.22960000  | -1.13620000 | 2.61440000  |
| H        | 2.08410000  | 0.32600000  | 3.07400000  |
| C        | 2.11580000  | -0.02030000 | 0.93220000  |
| H        | 1.45590000  | 0.43810000  | 0.15960000  |
| H        | 2.91390000  | 0.72650000  | 1.00900000  |
| C        | -0.47840000 | -2.08010000 | 0.84640000  |
| C        | 0.76190000  | -2.72690000 | 0.85400000  |
| C        | 0.82810000  | -3.95310000 | 1.55460000  |
| C        | -0.27110000 | -4.49070000 | 2.21410000  |
| C        | -1.49540000 | -3.82480000 | 2.16610000  |
| C        | -1.60020000 | -2.61930000 | 1.46680000  |
| H        | 1.78160000  | -4.48380000 | 1.55020000  |
| H        | -0.17430000 | -5.43810000 | 2.74790000  |
| H        | -2.37980000 | -4.23280000 | 2.66050000  |
| H        | -2.56240000 | -2.12330000 | 1.43020000  |
| C        | 2.06100000  | -2.40110000 | 0.13500000  |
| N        | 2.70670000  | -1.20870000 | 0.34780000  |
| O        | 2.56220000  | -3.28940000 | -0.53730000 |
| C        | 3.97370000  | -1.01940000 | -0.37360000 |
| H        | 3.96730000  | -1.74090000 | -1.20060000 |
| C        | 5.19480000  | -1.30230000 | 0.48190000  |
| C        | 5.15820000  | -1.26760000 | 1.88210000  |
| C        | 6.41540000  | -1.57490000 | -0.15780000 |
| C        | 6.31980000  | -1.49220000 | 2.62820000  |
| H        | 4.21530000  | -1.08490000 | 2.39960000  |

|    |             |             |             |
|----|-------------|-------------|-------------|
| C  | 7.57600000  | -1.79510000 | 0.58570000  |
| H  | 6.45200000  | -1.61230000 | -1.24980000 |
| C  | 7.53170000  | -1.75180000 | 1.98340000  |
| H  | 6.27540000  | -1.46730000 | 3.71980000  |
| H  | 8.51660000  | -2.00890000 | 0.07260000  |
| H  | 8.43850000  | -1.92840000 | 2.56680000  |
| C  | 3.94230000  | 0.37010000  | -1.07210000 |
| O  | 3.00190000  | 0.63910000  | -1.81270000 |
| N  | 4.95390000  | 1.20760000  | -0.77740000 |
| C  | 5.14240000  | 2.57310000  | -1.31730000 |
| C  | 6.44810000  | 3.09730000  | -0.71170000 |
| H  | 6.64660000  | 4.11920000  | -1.06560000 |
| H  | 6.39290000  | 3.12190000  | 0.38900000  |
| H  | 7.30110000  | 2.46310000  | -1.00190000 |
| C  | 3.96820000  | 3.46630000  | -0.88730000 |
| H  | 3.90370000  | 3.51890000  | 0.21110000  |
| H  | 4.11060000  | 4.48860000  | -1.26940000 |
| H  | 3.01970000  | 3.07720000  | -1.28140000 |
| C  | 5.25370000  | 2.52120000  | -2.84730000 |
| H  | 4.33030000  | 2.12790000  | -3.29310000 |
| H  | 5.43580000  | 3.53090000  | -3.24640000 |
| H  | 6.09220000  | 1.87490000  | -3.15050000 |
| I  | -0.18980000 | -1.06530000 | -2.36790000 |
| H  | 5.67410000  | 0.86140000  | -0.15170000 |
| Pd | -0.64100000 | -0.20720000 | 0.06330000  |
| P  | -2.94830000 | 0.04870000  | -0.27410000 |
| C  | -2.79650000 | 1.36780000  | -1.49630000 |
| C  | -3.36060000 | 1.21600000  | -2.77330000 |
| C  | -2.00320000 | 2.49240000  | -1.19390000 |
| C  | -3.15260000 | 2.20750000  | -3.73090000 |
| H  | -3.94940000 | 0.33230000  | -3.02080000 |
| C  | -1.79640000 | 3.47150000  | -2.16420000 |
| H  | -1.54250000 | 2.60160000  | -0.21210000 |
| C  | -2.37190000 | 3.33060000  | -3.43070000 |
| H  | -3.59960000 | 2.10060000  | -4.72130000 |
| H  | -1.18270000 | 4.34300000  | -1.92880000 |
| H  | -2.20870000 | 4.09730000  | -4.19100000 |
| C  | -3.86460000 | 0.65510000  | 1.15910000  |
| C  | -4.14910000 | 2.02560000  | 1.30740000  |
| C  | -4.39850000 | -0.27330000 | 2.08030000  |
| C  | -4.95850000 | 2.45560000  | 2.35900000  |
| H  | -3.76620000 | 2.75500000  | 0.59690000  |
| C  | -5.19790000 | 0.16750000  | 3.13030000  |
| H  | -4.22800000 | -1.34300000 | 1.96090000  |

|   |             |             |             |
|---|-------------|-------------|-------------|
| C | -5.47840000 | 1.53380000  | 3.27290000  |
| H | -5.19200000 | 3.51750000  | 2.45720000  |
| H | -5.61770000 | -0.55680000 | 3.83100000  |
| H | -6.11410000 | 1.87690000  | 4.09220000  |
| C | -3.90330000 | -1.34690000 | -0.91270000 |
| C | -5.30160000 | -1.15740000 | -0.97330000 |
| C | -3.33410000 | -2.53930000 | -1.38450000 |
| C | -6.10560000 | -2.14780000 | -1.53370000 |
| H | -5.75880000 | -0.23830000 | -0.60360000 |
| C | -4.15350000 | -3.52850000 | -1.92890000 |
| H | -2.26110000 | -2.70490000 | -1.32190000 |
| C | -5.53460000 | -3.33320000 | -2.01020000 |
| H | -7.18430000 | -1.99070000 | -1.59670000 |
| H | -3.70490000 | -4.45620000 | -2.28950000 |
| H | -6.17120000 | -4.10930000 | -2.44090000 |

**TS1**

|   |             |             |             |
|---|-------------|-------------|-------------|
| C | 1.10960000  | 2.32640000  | 1.06170000  |
| C | -0.05900000 | 3.04410000  | 1.42090000  |
| C | -0.71680000 | 3.91150000  | 0.55940000  |
| C | -0.17760000 | 4.05020000  | -0.72560000 |
| C | 0.95940000  | 3.32750000  | -1.11560000 |
| C | 1.61730000  | 2.45880000  | -0.23570000 |
| C | 1.50630000  | 1.54990000  | 2.24430000  |
| C | 0.51650000  | 1.87080000  | 3.24920000  |
| H | -1.60430000 | 4.46220000  | 0.87000000  |
| H | -0.65700000 | 4.72760000  | -1.43430000 |
| H | 1.34790000  | 3.44390000  | -2.12920000 |
| H | 2.49100000  | 1.90560000  | -0.58480000 |
| H | 0.47450000  | 1.51370000  | 4.27750000  |
| H | -1.18560000 | 3.06390000  | 3.25960000  |
| N | -0.37060000 | 2.71260000  | 2.75450000  |
| C | 2.82400000  | 0.96440000  | 2.65490000  |
| H | 2.65400000  | 0.17220000  | 3.39810000  |
| H | 3.37290000  | 1.75910000  | 3.19100000  |
| C | 3.76510000  | 0.52780000  | 1.55440000  |
| H | 4.00040000  | 1.41700000  | 0.95630000  |
| H | 4.70980000  | 0.23120000  | 2.03470000  |
| C | 0.36240000  | -0.51670000 | 2.02730000  |
| C | 1.16980000  | -1.50950000 | 1.52080000  |
| C | 0.59700000  | -2.81580000 | 1.63280000  |
| C | -0.66730000 | -3.03490000 | 2.16650000  |
| C | -1.46730000 | -1.95000000 | 2.56380000  |
| C | -0.93350000 | -0.63910000 | 2.50900000  |

|    |             |             |             |
|----|-------------|-------------|-------------|
| H  | 1.17540000  | -3.64480000 | 1.22280000  |
| H  | -1.05530000 | -4.05210000 | 2.23650000  |
| H  | -2.46590000 | -2.10750000 | 2.97490000  |
| H  | -1.50420000 | 0.20560000  | 2.89170000  |
| C  | 2.37980000  | -1.45710000 | 0.58790000  |
| N  | 3.38860000  | -0.53240000 | 0.60900000  |
| O  | 2.38140000  | -2.34650000 | -0.25710000 |
| C  | 4.42670000  | -0.79350000 | -0.41270000 |
| H  | 3.90460000  | -1.20760000 | -1.28280000 |
| C  | 5.45790000  | -1.82590000 | 0.02100000  |
| C  | 5.55860000  | -2.30540000 | 1.33320000  |
| C  | 6.34050000  | -2.32960000 | -0.94980000 |
| C  | 6.52920000  | -3.25400000 | 1.67260000  |
| H  | 4.86890000  | -1.95400000 | 2.10210000  |
| C  | 7.31110000  | -3.27320000 | -0.61220000 |
| H  | 6.26330000  | -1.97600000 | -1.98130000 |
| C  | 7.41100000  | -3.73740000 | 0.70390000  |
| H  | 6.59170000  | -3.61780000 | 2.70110000  |
| H  | 7.98750000  | -3.65410000 | -1.38120000 |
| H  | 8.16880000  | -4.47800000 | 0.96990000  |
| C  | 4.98970000  | 0.55010000  | -0.94020000 |
| O  | 4.23090000  | 1.31180000  | -1.53810000 |
| N  | 6.28490000  | 0.79760000  | -0.69430000 |
| C  | 7.04440000  | 1.99360000  | -1.12450000 |
| C  | 8.47380000  | 1.79710000  | -0.60960000 |
| H  | 9.10280000  | 2.65160000  | -0.89820000 |
| H  | 8.49040000  | 1.71740000  | 0.48960000  |
| H  | 8.92370000  | 0.88360000  | -1.03090000 |
| C  | 6.42410000  | 3.25180000  | -0.49890000 |
| H  | 6.42590000  | 3.17930000  | 0.60060000  |
| H  | 7.00660000  | 4.14150000  | -0.78360000 |
| H  | 5.38960000  | 3.38790000  | -0.84190000 |
| C  | 7.04120000  | 2.08720000  | -2.65670000 |
| H  | 6.01790000  | 2.20450000  | -3.03830000 |
| H  | 7.63760000  | 2.95280000  | -2.98360000 |
| H  | 7.47860000  | 1.17870000  | -3.10000000 |
| I  | -1.44750000 | -1.47810000 | -2.40330000 |
| H  | 6.80590000  | 0.07870000  | -0.20270000 |
| Pd | -1.63110000 | -0.95930000 | 0.10550000  |
| P  | -3.63710000 | -0.01690000 | -0.14410000 |
| C  | -3.81360000 | 1.11370000  | -1.55310000 |
| C  | -5.04570000 | 1.23970000  | -2.21080000 |
| C  | -2.72030000 | 1.90710000  | -1.93850000 |
| C  | -5.17940000 | 2.16450000  | -3.25010000 |

|           |             |             |             |
|-----------|-------------|-------------|-------------|
| H         | -5.89620000 | 0.61920000  | -1.92580000 |
| C         | -2.86570000 | 2.82950000  | -2.97280000 |
| H         | -1.75430000 | 1.79170000  | -1.44580000 |
| C         | -4.09480000 | 2.95880000  | -3.63000000 |
| H         | -6.13670000 | 2.25750000  | -3.76750000 |
| H         | -2.01260000 | 3.44000000  | -3.27530000 |
| H         | -4.20310000 | 3.67570000  | -4.44710000 |
| C         | -3.86080000 | 0.99090000  | 1.35420000  |
| C         | -3.69630000 | 2.38470000  | 1.31180000  |
| C         | -4.15940000 | 0.35780000  | 2.57640000  |
| C         | -3.82260000 | 3.13590000  | 2.48270000  |
| H         | -3.48520000 | 2.88540000  | 0.36730000  |
| C         | -4.27840000 | 1.11310000  | 3.74150000  |
| H         | -4.30820000 | -0.72260000 | 2.61130000  |
| C         | -4.10420000 | 2.50300000  | 3.69790000  |
| H         | -3.71440000 | 4.22200000  | 2.44260000  |
| H         | -4.51720000 | 0.61900000  | 4.68570000  |
| H         | -4.20820000 | 3.09360000  | 4.61100000  |
| C         | -4.95140000 | -1.26360000 | -0.14830000 |
| C         | -6.24140000 | -0.90650000 | 0.28950000  |
| C         | -4.69750000 | -2.56680000 | -0.60400000 |
| C         | -7.26900000 | -1.84870000 | 0.24890000  |
| H         | -6.44420000 | 0.10190000  | 0.65390000  |
| C         | -5.73260000 | -3.50330000 | -0.63330000 |
| H         | -3.69550000 | -2.84470000 | -0.93270000 |
| C         | -7.01590000 | -3.14570000 | -0.21070000 |
| H         | -8.27120000 | -1.56850000 | 0.58050000  |
| H         | -5.53290000 | -4.51720000 | -0.98630000 |
| H         | -7.82280000 | -3.88190000 | -0.23490000 |
| <b>II</b> |             |             |             |
| C         | -1.05410000 | -0.78160000 | 0.90660000  |
| C         | -0.05260000 | -1.47760000 | 1.60250000  |
| C         | 0.54090000  | -2.65930000 | 1.14500000  |
| C         | 0.05350000  | -3.16170000 | -0.07790000 |
| C         | -0.95660000 | -2.49110000 | -0.77620000 |
| C         | -1.50960000 | -1.28970000 | -0.30450000 |
| C         | -1.39360000 | 0.48310000  | 1.69640000  |
| C         | -0.50760000 | 0.31030000  | 2.89900000  |
| H         | 1.27940000  | -3.20240000 | 1.73780000  |
| H         | 0.46830000  | -4.09020000 | -0.47390000 |
| H         | -1.32230000 | -2.90240000 | -1.71820000 |
| H         | -2.29150000 | -0.80150000 | -0.88440000 |
| H         | -0.46080000 | 0.96870000  | 3.76840000  |
| H         | 0.84440000  | -1.09700000 | 3.53760000  |

|   |             |             |             |
|---|-------------|-------------|-------------|
| N | 0.20080000  | -0.76920000 | 2.81170000  |
| C | -2.84860000 | 0.56400000  | 2.24730000  |
| H | -3.00210000 | 1.57830000  | 2.64170000  |
| H | -2.96220000 | -0.13850000 | 3.08680000  |
| C | -3.91120000 | 0.17200000  | 1.25100000  |
| H | -3.77220000 | -0.89080000 | 1.00050000  |
| H | -4.87880000 | 0.23530000  | 1.77250000  |
| C | -1.03550000 | 1.77180000  | 0.95350000  |
| C | -1.91520000 | 2.40350000  | 0.04760000  |
| C | -1.48970000 | 3.61780000  | -0.53130000 |
| C | -0.25410000 | 4.19080000  | -0.25080000 |
| C | 0.62430000  | 3.53720000  | 0.61110000  |
| C | 0.22760000  | 2.33770000  | 1.19540000  |
| H | -2.16530000 | 4.09720000  | -1.23740000 |
| H | 0.02490000  | 5.13680000  | -0.71940000 |
| H | 1.61230000  | 3.94700000  | 0.82530000  |
| H | 0.93760000  | 1.82840000  | 1.85090000  |
| C | -3.24100000 | 1.92320000  | -0.53330000 |
| N | -4.02690000 | 0.93130000  | 0.01050000  |
| O | -3.60910000 | 2.46740000  | -1.56980000 |
| C | -5.21650000 | 0.57360000  | -0.77710000 |
| H | -5.01620000 | 0.92520000  | -1.79640000 |
| C | -6.49140000 | 1.26070000  | -0.31210000 |
| C | -6.51040000 | 2.16490000  | 0.75720000  |
| C | -7.68480000 | 1.02990000  | -1.01930000 |
| C | -7.69650000 | 2.80590000  | 1.12980000  |
| H | -5.58690000 | 2.38980000  | 1.29270000  |
| C | -8.86970000 | 1.66650000  | -0.64680000 |
| H | -7.68390000 | 0.34850000  | -1.87380000 |
| C | -8.88110000 | 2.55410000  | 0.43460000  |
| H | -7.69060000 | 3.51040000  | 1.96520000  |
| H | -9.78710000 | 1.47510000  | -1.20880000 |
| H | -9.80760000 | 3.05510000  | 0.72510000  |
| C | -5.25450000 | -0.97010000 | -0.91490000 |
| O | -4.34190000 | -1.52210000 | -1.52570000 |
| N | -6.27420000 | -1.61140000 | -0.31850000 |
| C | -6.50330000 | -3.07300000 | -0.31420000 |
| C | -7.80100000 | -3.30060000 | 0.46700000  |
| H | -8.03810000 | -4.37380000 | 0.50400000  |
| H | -7.71050000 | -2.93400000 | 1.50260000  |
| H | -8.64550000 | -2.78060000 | -0.01300000 |
| C | -5.33260000 | -3.77670000 | 0.38900000  |
| H | -5.22180000 | -3.40410000 | 1.42000000  |
| H | -5.51480000 | -4.86140000 | 0.43360000  |

|    |             |             |             |
|----|-------------|-------------|-------------|
| H  | -4.39310000 | -3.60230000 | -0.15230000 |
| C  | -6.66010000 | -3.58380000 | -1.75380000 |
| H  | -5.74630000 | -3.40250000 | -2.33530000 |
| H  | -6.86510000 | -4.66550000 | -1.74960000 |
| H  | -7.49980000 | -3.07650000 | -2.25440000 |
| I  | 1.44160000  | 0.37520000  | -1.98390000 |
| H  | -6.96570000 | -1.03970000 | 0.15550000  |
| Pd | 2.21680000  | -0.92420000 | 0.10900000  |
| P  | 4.22700000  | -0.03440000 | 0.02650000  |
| C  | 5.28140000  | -0.48450000 | -1.35660000 |
| C  | 6.45840000  | 0.24360000  | -1.59980000 |
| C  | 4.93720000  | -1.58190000 | -2.16520000 |
| C  | 7.29320000  | -0.13930000 | -2.65080000 |
| H  | 6.71930000  | 1.10220000  | -0.97860000 |
| C  | 5.78110000  | -1.95510000 | -3.20960000 |
| H  | 4.00730000  | -2.12630000 | -1.98530000 |
| C  | 6.95640000  | -1.23430000 | -3.45250000 |
| H  | 8.20830000  | 0.42360000  | -2.84650000 |
| H  | 5.51600000  | -2.80370000 | -3.84340000 |
| H  | 7.60990000  | -1.52480000 | -4.27820000 |
| C  | 4.43490000  | -1.15490000 | 1.43620000  |
| C  | 5.13090000  | -2.37600000 | 1.30100000  |
| C  | 3.72320000  | -0.87860000 | 2.63250000  |
| C  | 5.12720000  | -3.29200000 | 2.34920000  |
| H  | 5.67830000  | -2.59410000 | 0.38250000  |
| C  | 3.72500000  | -1.81220000 | 3.67130000  |
| H  | 3.20450000  | 0.07480000  | 2.75450000  |
| C  | 4.42330000  | -3.01480000 | 3.52990000  |
| H  | 5.67850000  | -4.22910000 | 2.24940000  |
| H  | 3.19430000  | -1.59180000 | 4.60040000  |
| H  | 4.42820000  | -3.74080000 | 4.34610000  |
| C  | 4.50490000  | 1.67850000  | 0.50690000  |
| C  | 5.20750000  | 1.98110000  | 1.68800000  |
| C  | 4.07820000  | 2.70880000  | -0.34990000 |
| C  | 5.46740000  | 3.31420000  | 2.01010000  |
| H  | 5.56910000  | 1.18700000  | 2.34210000  |
| C  | 4.34980000  | 4.03540000  | -0.01810000 |
| H  | 3.53120000  | 2.47240000  | -1.26400000 |
| C  | 5.03870000  | 4.33950000  | 1.16160000  |
| H  | 6.01720000  | 3.55020000  | 2.92380000  |
| H  | 4.01740000  | 4.83580000  | -0.68240000 |
| H  | 5.24650000  | 5.38080000  | 1.41820000  |

TS2

|   |             |             |             |
|---|-------------|-------------|-------------|
| C | 1.46840000  | 0.11700000  | -0.77550000 |
| C | 0.15570000  | 0.58650000  | -0.60850000 |
| C | -0.39660000 | 1.59520000  | -1.39530000 |
| C | 0.41450000  | 2.13060000  | -2.40510000 |
| C | 1.72390000  | 1.66110000  | -2.59210000 |
| C | 2.26400000  | 0.64450000  | -1.78570000 |
| C | 1.70310000  | -0.98770000 | 0.25390000  |
| C | 0.35600000  | -0.97170000 | 0.95790000  |
| H | -1.41380000 | 1.95460000  | -1.23970000 |
| H | 0.02220000  | 2.91910000  | -3.04620000 |
| H | 2.34240000  | 2.09720000  | -3.38230000 |
| H | 3.29190000  | 0.32080000  | -1.94850000 |
| H | 0.10990000  | -1.60790000 | 1.81500000  |
| N | -0.46860000 | -0.11140000 | 0.46450000  |
| C | 2.77410000  | -0.69070000 | 1.33750000  |
| H | 2.94470000  | -1.61040000 | 1.91310000  |
| H | 2.38140000  | 0.06420000  | 2.03560000  |
| C | 4.06590000  | -0.12570000 | 0.80160000  |
| H | 3.84720000  | 0.80240000  | 0.26080000  |
| H | 4.67890000  | 0.16750000  | 1.66890000  |
| C | 1.94710000  | -2.34360000 | -0.40490000 |
| C | 3.22920000  | -2.82280000 | -0.75730000 |
| C | 3.31180000  | -4.11650000 | -1.31630000 |
| C | 2.19390000  | -4.90620000 | -1.55830000 |
| C | 0.92760000  | -4.39960000 | -1.26590000 |
| C | 0.82190000  | -3.13700000 | -0.69430000 |
| H | 4.30060000  | -4.48430000 | -1.58680000 |
| H | 2.31330000  | -5.90290000 | -1.98560000 |
| H | 0.02760000  | -4.98310000 | -1.47420000 |
| H | -0.17430000 | -2.75460000 | -0.47090000 |
| C | 4.58330000  | -2.11380000 | -0.76780000 |
| N | 4.89660000  | -0.98700000 | -0.03560000 |
| O | 5.45250000  | -2.62550000 | -1.46700000 |
| C | 6.23990000  | -0.44280000 | -0.26020000 |
| H | 6.63430000  | -0.97730000 | -1.13520000 |
| C | 7.20180000  | -0.69530000 | 0.89060000  |
| C | 6.82540000  | -1.38710000 | 2.04760000  |
| C | 8.53730000  | -0.27110000 | 0.76910000  |
| C | 7.74790000  | -1.62750000 | 3.07190000  |
| H | 5.80850000  | -1.77040000 | 2.14220000  |
| C | 9.45810000  | -0.50340000 | 1.79230000  |
| H | 8.86490000  | 0.24340000  | -0.13900000 |
| C | 9.06470000  | -1.17830000 | 2.95270000  |
| H | 7.43420000  | -2.16850000 | 3.96580000  |



|    |             |             |             |
|----|-------------|-------------|-------------|
| H  | 10.49470000 | -0.16870000 | 1.67810000  |
| H  | 9.78490000  | -1.36240000 | 3.75340000  |
| C  | 6.08500000  | 1.01650000  | -0.76290000 |
| O  | 5.46590000  | 1.20320000  | -1.80920000 |
| N  | 6.60760000  | 1.99220000  | -0.00140000 |
| C  | 6.58800000  | 3.44020000  | -0.30410000 |
| C  | 7.35100000  | 4.12390000  | 0.83250000  |
| H  | 7.40530000  | 5.20740000  | 0.65290000  |
| H  | 6.84960000  | 3.96650000  | 1.80070000  |
| H  | 8.38060000  | 3.73830000  | 0.90600000  |
| C  | 5.13520000  | 3.93810000  | -0.34210000 |
| H  | 4.63340000  | 3.74170000  | 0.61900000  |
| H  | 5.11620000  | 5.02350000  | -0.52540000 |
| H  | 4.57320000  | 3.43610000  | -1.14090000 |
| C  | 7.28800000  | 3.70220000  | -1.64480000 |
| H  | 6.77170000  | 3.18760000  | -2.46360000 |
| H  | 7.29780000  | 4.78160000  | -1.86090000 |
| H  | 8.33170000  | 3.35180000  | -1.61120000 |
| H  | 7.09640000  | 1.71010000  | 0.84160000  |
| Pd | -2.78940000 | -0.51500000 | 0.81180000  |
| P  | -4.55550000 | 0.21940000  | -0.47170000 |
| C  | -4.13450000 | -1.11680000 | -1.59670000 |
| C  | -4.99880000 | -2.21900000 | -1.78130000 |
| C  | -2.84300000 | -1.11620000 | -2.19020000 |
| C  | -4.56610000 | -3.29970000 | -2.54660000 |
| H  | -5.99670000 | -2.22060000 | -1.34180000 |
| C  | -2.42040000 | -2.21740000 | -2.93280000 |
| H  | -2.19010000 | -0.24590000 | -2.08470000 |
| C  | -3.27870000 | -3.30770000 | -3.10570000 |
| H  | -5.23990000 | -4.14400000 | -2.71170000 |
| H  | -1.42320000 | -2.21720000 | -3.38270000 |
| H  | -2.94880000 | -4.16820000 | -3.69250000 |
| C  | -4.15480000 | 1.82440000  | -1.15430000 |
| C  | -4.03320000 | 1.98520000  | -2.54730000 |
| C  | -3.96610000 | 2.91490000  | -0.28030000 |
| C  | -3.70960000 | 3.24490000  | -3.05680000 |
| H  | -4.19610000 | 1.15030000  | -3.22570000 |
| C  | -3.64420000 | 4.16210000  | -0.81050000 |
| H  | -4.06550000 | 2.77730000  | 0.79920000  |
| C  | -3.50800000 | 4.32530000  | -2.19520000 |
| H  | -3.61570000 | 3.37560000  | -4.13630000 |
| H  | -3.49120000 | 5.01330000  | -0.13890000 |
| H  | -3.24500000 | 5.30360000  | -2.60250000 |
| C  | -6.22080000 | 0.11320000  | 0.16510000  |

|   |             |             |             |
|---|-------------|-------------|-------------|
| C | -7.11390000 | 1.17180000  | -0.07730000 |
| C | -6.62240000 | -1.01090000 | 0.90840000  |
| C | -8.41710000 | 1.08900000  | 0.41110000  |
| H | -6.80280000 | 2.05000000  | -0.64690000 |
| C | -7.92620000 | -1.08280000 | 1.38610000  |
| H | -5.91310000 | -1.80930000 | 1.13830000  |
| C | -8.82430000 | -0.03670000 | 1.13950000  |
| H | -9.11750000 | 1.90330000  | 0.22290000  |
| H | -8.24480000 | -1.95370000 | 1.96660000  |
| H | -9.84540000 | -0.09490000 | 1.52440000  |
| H | -1.57360000 | 0.66970000  | 1.18870000  |
| I | -3.81690000 | 0.51430000  | 2.92860000  |

## IX

|   |             |             |             |
|---|-------------|-------------|-------------|
| C | -1.31690000 | 0.24460000  | -1.21830000 |
| C | -0.05320000 | -0.36250000 | -1.31110000 |
| C | 0.33460000  | -1.13080000 | -2.40290000 |
| C | -0.59530000 | -1.28840000 | -3.43810000 |
| C | -1.85750000 | -0.68770000 | -3.36170000 |
| C | -2.23150000 | 0.08780000  | -2.25320000 |
| C | -1.38580000 | 0.98770000  | 0.11180000  |
| C | 0.01980000  | 0.73610000  | 0.62210000  |
| H | 1.32030000  | -1.59640000 | -2.45420000 |
| H | -0.33080000 | -1.88680000 | -4.31230000 |
| H | -2.57310000 | -0.82850000 | -4.17370000 |
| H | -3.22890000 | 0.52220000  | -2.21170000 |
| H | 0.39640000  | 1.09400000  | 1.58350000  |
| N | 0.70810000  | -0.04040000 | -0.14660000 |
| C | -2.31960000 | 0.32410000  | 1.17310000  |
| H | -2.42570000 | 1.02280000  | 2.01600000  |
| H | -1.84430000 | -0.58900000 | 1.56310000  |
| C | -3.65640000 | -0.12110000 | 0.63420000  |
| H | -3.47790000 | -0.91320000 | -0.10780000 |
| H | -4.20310000 | -0.59620000 | 1.46440000  |
| C | -1.71570000 | 2.46730000  | 0.00170000  |
| C | -3.03770000 | 2.96460000  | -0.03860000 |
| C | -3.21150000 | 4.36420000  | -0.04170000 |
| C | -2.13850000 | 5.24930000  | -0.02380000 |
| C | -0.83700000 | 4.74810000  | -0.03880000 |
| C | -0.64190000 | 3.36960000  | -0.02750000 |
| H | -4.23160000 | 4.74250000  | -0.08110000 |
| H | -2.32190000 | 6.32580000  | -0.01670000 |
| H | 0.02440000  | 5.41860000  | -0.05780000 |
| H | 0.37650000  | 2.98120000  | -0.05030000 |

|    |              |             |             |
|----|--------------|-------------|-------------|
| C  | -4.35280000  | 2.21740000  | -0.22040000 |
| N  | -4.53580000  | 0.87690000  | 0.03370000  |
| O  | -5.30170000  | 2.87380000  | -0.64040000 |
| C  | -5.87210000  | 0.35920000  | -0.29850000 |
| H  | -6.26730000  | 1.01880000  | -1.07990000 |
| C  | -6.85370000  | 0.40160000  | 0.86270000  |
| C  | -6.49460000  | 0.86470000  | 2.13470000  |
| C  | -8.18370000  | 0.00340000  | 0.64260000  |
| C  | -7.43360000  | 0.90870000  | 3.17070000  |
| H  | -5.47710000  | 1.21290000  | 2.31770000  |
| C  | -9.12190000  | 0.04660000  | 1.67490000  |
| H  | -8.48710000  | -0.34290000 | -0.34860000 |
| C  | -8.74850000  | 0.49590000  | 2.94640000  |
| H  | -7.13410000  | 1.27430000  | 4.15610000  |
| H  | -10.15180000 | -0.26500000 | 1.48440000  |
| H  | -9.48330000  | 0.53140000  | 3.75430000  |
| C  | -5.70140000  | -1.00920000 | -1.00610000 |
| O  | -5.18050000  | -1.03490000 | -2.11720000 |
| N  | -6.10040000  | -2.09610000 | -0.31910000 |
| C  | -5.99230000  | -3.49940000 | -0.77320000 |
| C  | -6.59240000  | -4.36000000 | 0.34250000  |
| H  | -6.54240000  | -5.42440000 | 0.07040000  |
| H  | -6.04170000  | -4.22340000 | 1.28750000  |
| H  | -7.64940000  | -4.10150000 | 0.51620000  |
| C  | -4.51290000  | -3.86040000 | -0.97840000 |
| H  | -3.95130000  | -3.73000000 | -0.03960000 |
| H  | -4.41870000  | -4.91200000 | -1.29050000 |
| H  | -4.06170000  | -3.22450000 | -1.75200000 |
| C  | -6.78530000  | -3.69380000 | -2.07340000 |
| H  | -6.38330000  | -3.05770000 | -2.87320000 |
| H  | -6.72970000  | -4.74480000 | -2.39690000 |
| H  | -7.84530000  | -3.43680000 | -1.92090000 |
| H  | -6.52800000  | -1.93950000 | 0.58780000  |
| Pd | 2.39370000   | -1.12400000 | 0.45900000  |
| P  | 3.98250000   | 0.49770000  | -0.08800000 |
| C  | 3.12590000   | 1.91100000  | -0.78850000 |
| C  | 3.26600000   | 3.17500000  | -0.18520000 |
| C  | 2.43060000   | 1.77230000  | -2.00570000 |
| C  | 2.73020000   | 4.29630000  | -0.82100000 |
| H  | 3.80870000   | 3.28830000  | 0.75350000  |
| C  | 1.89150000   | 2.89760000  | -2.62030000 |
| H  | 2.31810000   | 0.79410000  | -2.47450000 |
| C  | 2.04650000   | 4.16000000  | -2.03230000 |
| H  | 2.85030000   | 5.28070000  | -0.36440000 |

|   |            |             |             |
|---|------------|-------------|-------------|
| H | 1.34760000 | 2.79120000  | -3.56070000 |
| H | 1.62210000 | 5.04000000  | -2.51960000 |
| C | 5.27940000 | -0.03890000 | -1.20530000 |
| C | 5.51950000 | 0.69660000  | -2.38600000 |
| C | 6.11480000 | -1.12050000 | -0.86560000 |
| C | 6.59010000 | 0.34510000  | -3.20670000 |
| H | 4.89780000 | 1.55000000  | -2.65240000 |
| C | 7.18280000 | -1.45500000 | -1.69110000 |
| H | 5.92720000 | -1.70030000 | 0.03820000  |
| C | 7.41870000 | -0.72750000 | -2.86490000 |
| H | 6.77950000 | 0.91870000  | -4.11610000 |
| H | 7.82910000 | -2.29270000 | -1.42270000 |
| H | 8.25250000 | -1.00080000 | -3.51530000 |
| C | 4.59020000 | 0.86950000  | 1.55770000  |
| C | 5.96880000 | 0.88450000  | 1.83310000  |
| C | 3.65180000 | 1.13190000  | 2.57830000  |
| C | 6.40050000 | 1.17430000  | 3.12740000  |
| H | 6.69630000 | 0.68640000  | 1.04570000  |
| C | 4.09760000 | 1.40920000  | 3.86690000  |
| H | 2.57910000 | 1.11640000  | 2.36540000  |
| C | 5.47120000 | 1.42980000  | 4.14090000  |
| H | 7.47010000 | 1.20050000  | 3.34480000  |
| H | 3.37590000 | 1.61020000  | 4.66080000  |
| H | 5.81780000 | 1.64830000  | 5.15340000  |
| H | 2.72200000 | -1.78870000 | -0.84580000 |
| I | 3.84840000 | -3.07470000 | 1.25110000  |

±2

|   |             |             |             |
|---|-------------|-------------|-------------|
| C | -3.44130000 | 0.43240000  | -0.58260000 |
| C | -4.61530000 | 1.15740000  | -0.29060000 |
| C | -5.68020000 | 1.21610000  | -1.18650000 |
| C | -5.55710000 | 0.52070000  | -2.39750000 |
| C | -4.40160000 | -0.21530000 | -2.68720000 |
| C | -3.33230000 | -0.27050000 | -1.77710000 |
| C | -2.50800000 | 0.59400000  | 0.61310000  |
| C | -3.42440000 | 1.43250000  | 1.50920000  |
| H | -6.57960000 | 1.78400000  | -0.93980000 |
| H | -6.37580000 | 0.54570000  | -3.12080000 |
| H | -4.33090000 | -0.76050000 | -3.63140000 |
| H | -2.44950000 | -0.86990000 | -2.00830000 |
| H | -3.11230000 | 1.78160000  | 2.50010000  |
| N | -4.55130000 | 1.76420000  | 0.99100000  |
| C | -1.29240000 | 1.51050000  | 0.31950000  |
| H | -0.71440000 | 1.63500000  | 1.24910000  |

|   |             |             |             |
|---|-------------|-------------|-------------|
| H | -1.68400000 | 2.50240000  | 0.04600000  |
| C | -0.36610000 | 1.09060000  | -0.80260000 |
| H | -0.93510000 | 0.92560000  | -1.73350000 |
| H | 0.29880000  | 1.93820000  | -1.00120000 |
| C | -2.13180000 | -0.75180000 | 1.22500000  |
| C | -1.09800000 | -1.58010000 | 0.72920000  |
| C | -0.90150000 | -2.84860000 | 1.31400000  |
| C | -1.67510000 | -3.29670000 | 2.37970000  |
| C | -2.70220000 | -2.48540000 | 2.86280000  |
| C | -2.92450000 | -1.23970000 | 2.27950000  |
| H | -0.11370000 | -3.48220000 | 0.90650000  |
| H | -1.48330000 | -4.27750000 | 2.82080000  |
| H | -3.33750000 | -2.82010000 | 3.68620000  |
| H | -3.75230000 | -0.63160000 | 2.64780000  |
| C | -0.12980000 | -1.32620000 | -0.40750000 |
| N | 0.48820000  | -0.07480000 | -0.52380000 |
| O | 0.22460000  | -2.26490000 | -1.09940000 |
| C | 1.75460000  | -0.05540000 | -1.27010000 |
| H | 1.58430000  | -0.05020000 | -2.35830000 |
| C | 2.70490000  | -1.19130000 | -0.92280000 |
| C | 2.92820000  | -1.57930000 | 0.40660000  |
| C | 3.45810000  | -1.79120000 | -1.93840000 |
| C | 3.87160000  | -2.56290000 | 0.70920000  |
| H | 2.35290000  | -1.12090000 | 1.21360000  |
| C | 4.40830000  | -2.77020000 | -1.63680000 |
| H | 3.29340000  | -1.49080000 | -2.97590000 |
| C | 4.61740000  | -3.16190000 | -0.31160000 |
| H | 4.02660000  | -2.86200000 | 1.74900000  |
| H | 4.98460000  | -3.23180000 | -2.44260000 |
| H | 5.35720000  | -3.93040000 | -0.07420000 |
| C | 2.55140000  | 1.23990000  | -0.96400000 |
| O | 3.24320000  | 1.75230000  | -1.83310000 |
| N | 2.46130000  | 1.66020000  | 0.31730000  |
| C | 3.23310000  | 2.75660000  | 0.93500000  |
| C | 2.78480000  | 2.82950000  | 2.39820000  |
| H | 3.33090000  | 3.62580000  | 2.92510000  |
| H | 1.70760000  | 3.05120000  | 2.47180000  |
| H | 2.98030000  | 1.87930000  | 2.92170000  |
| C | 2.92130000  | 4.08250000  | 0.22530000  |
| H | 1.84450000  | 4.30940000  | 0.28280000  |
| H | 3.47190000  | 4.90820000  | 0.70240000  |
| H | 3.21100000  | 4.03260000  | -0.83270000 |
| C | 4.73430000  | 2.44000000  | 0.85690000  |
| H | 5.05640000  | 2.35470000  | -0.18990000 |

|   |            |            |            |
|---|------------|------------|------------|
| H | 5.31980000 | 3.23790000 | 1.33970000 |
| H | 4.95640000 | 1.48920000 | 1.36680000 |
| H | 1.84350000 | 1.12450000 | 0.91960000 |

**VII**

|   |             |             |             |
|---|-------------|-------------|-------------|
| C | 4.83190000  | -0.49190000 | -1.12810000 |
| C | 5.78050000  | -1.31450000 | -1.80640000 |
| C | 6.68090000  | -2.13330000 | -1.11020000 |
| C | 6.62050000  | -2.12390000 | 0.28190000  |
| C | 5.68800000  | -1.31690000 | 0.97230000  |
| C | 4.79550000  | -0.50390000 | 0.27890000  |
| C | 4.07900000  | 0.20930000  | -2.13990000 |
| C | 4.57830000  | -0.21350000 | -3.35660000 |
| H | 7.40440000  | -2.75610000 | -1.64110000 |
| H | 7.31020000  | -2.75180000 | 0.85100000  |
| H | 5.67410000  | -1.32980000 | 2.06510000  |
| H | 4.08010000  | 0.12230000  | 0.81460000  |
| H | 4.27950000  | 0.07300000  | -4.36370000 |
| H | 6.13990000  | -1.55270000 | -3.89290000 |
| N | 5.59590000  | -1.11690000 | -3.15640000 |
| C | 2.93110000  | 1.13710000  | -1.89890000 |
| H | 2.59780000  | 1.58850000  | -2.84270000 |
| H | 3.22720000  | 1.95840000  | -1.22230000 |
| C | 1.75830000  | 0.36280000  | -1.27340000 |
| H | 1.50140000  | -0.48980000 | -1.90770000 |
| H | 2.04120000  | -0.02270000 | -0.28750000 |
| C | -2.56980000 | 0.97960000  | -0.90060000 |
| C | -1.83910000 | 1.24650000  | -2.07630000 |
| C | -2.55150000 | 1.57430000  | -3.24640000 |
| C | -3.94110000 | 1.64670000  | -3.24600000 |
| C | -4.64970000 | 1.37760000  | -2.07230000 |
| C | -3.96190000 | 1.03580000  | -0.90120000 |
| H | -1.98640000 | 1.77580000  | -4.15740000 |
| H | -4.47280000 | 1.90740000  | -4.16320000 |
| H | -5.74140000 | 1.41780000  | -2.06260000 |
| H | -4.52700000 | 0.78970000  | -0.00050000 |
| C | -0.36140000 | 1.11970000  | -2.26390000 |
| N | 0.53780000  | 1.17900000  | -1.12240000 |
| O | 0.13080000  | 0.89450000  | -3.34340000 |
| C | 0.23170000  | 1.81550000  | 0.02780000  |
| C | -0.52530000 | 3.08140000  | 0.04650000  |
| C | -0.63750000 | 3.87540000  | -1.11610000 |
| C | -1.19030000 | 3.49370000  | 1.23260000  |
| C | -1.43710000 | 5.01040000  | -1.10870000 |

|    |             |             |             |
|----|-------------|-------------|-------------|
| H  | -0.07200000 | 3.62230000  | -2.01290000 |
| C  | -2.01720000 | 4.61670000  | 1.21480000  |
| H  | -1.05090000 | 2.95700000  | 2.17300000  |
| C  | -2.15100000 | 5.36830000  | 0.04510000  |
| H  | -1.50620000 | 5.62630000  | -2.00720000 |
| H  | -2.54110000 | 4.91370000  | 2.12510000  |
| H  | -2.79080000 | 6.25310000  | 0.03540000  |
| C  | 0.96210000  | 1.52990000  | 1.35230000  |
| O  | 0.27190000  | 0.95110000  | 2.21450000  |
| N  | 2.17410000  | 2.02470000  | 1.53290000  |
| C  | 2.89190000  | 2.14530000  | 2.84440000  |
| C  | 4.26550000  | 2.73320000  | 2.51560000  |
| H  | 4.83250000  | 2.88400000  | 3.44500000  |
| H  | 4.84510000  | 2.05980000  | 1.86660000  |
| H  | 4.16810000  | 3.71040000  | 2.01570000  |
| C  | 3.03880000  | 0.77080000  | 3.50640000  |
| H  | 3.57760000  | 0.07170000  | 2.85160000  |
| H  | 3.62040000  | 0.88440000  | 4.43270000  |
| H  | 2.06420000  | 0.33650000  | 3.76090000  |
| C  | 2.09490000  | 3.10480000  | 3.73780000  |
| H  | 1.10480000  | 2.69370000  | 3.98130000  |
| H  | 2.63670000  | 3.26450000  | 4.68170000  |
| H  | 1.96460000  | 4.08060000  | 3.24520000  |
| H  | 2.57730000  | 2.53740000  | 0.75000000  |
| Pd | -1.63010000 | 0.72520000  | 0.82200000  |
| P  | -1.66010000 | -1.55150000 | 0.40720000  |
| C  | -0.62660000 | -2.31300000 | 1.69110000  |
| C  | -1.20400000 | -3.17260000 | 2.64160000  |
| C  | 0.75190000  | -2.03660000 | 1.74500000  |
| C  | -0.40050000 | -3.75850000 | 3.62220000  |
| H  | -2.27200000 | -3.39190000 | 2.61440000  |
| C  | 1.54740000  | -2.63520000 | 2.71890000  |
| H  | 1.20720000  | -1.36220000 | 1.02160000  |
| C  | 0.97130000  | -3.49460000 | 3.66130000  |
| H  | -0.85140000 | -4.42960000 | 4.35630000  |
| H  | 2.61870000  | -2.42700000 | 2.74390000  |
| H  | 1.59480000  | -3.95880000 | 4.42860000  |
| C  | -1.10800000 | -2.10500000 | -1.22670000 |
| C  | 0.12610000  | -2.75390000 | -1.40280000 |
| C  | -1.93090000 | -1.85380000 | -2.34210000 |
| C  | 0.54090000  | -3.12250000 | -2.68380000 |
| H  | 0.76390000  | -2.98050000 | -0.54980000 |
| C  | -1.50720000 | -2.22560000 | -3.61540000 |
| H  | -2.90130000 | -1.37440000 | -2.21660000 |

|   |             |             |             |
|---|-------------|-------------|-------------|
| C | -0.26720000 | -2.84980000 | -3.79040000 |
| H | 1.50150000  | -3.62530000 | -2.81360000 |
| H | -2.14640000 | -2.02040000 | -4.47640000 |
| H | 0.06440000  | -3.13180000 | -4.79220000 |
| C | -3.36630000 | -2.09700000 | 0.67050000  |
| C | -3.88230000 | -3.21730000 | 0.00130000  |
| C | -4.15500000 | -1.40680000 | 1.60660000  |
| C | -5.18650000 | -3.63870000 | 0.27050000  |
| H | -3.27110000 | -3.76070000 | -0.72100000 |
| C | -5.45470000 | -1.83660000 | 1.87170000  |
| H | -3.74920000 | -0.53600000 | 2.13110000  |
| C | -5.97110000 | -2.95120000 | 1.20130000  |
| H | -5.58970000 | -4.51060000 | -0.24910000 |
| H | -6.06670000 | -1.30060000 | 2.60020000  |
| H | -6.99110000 | -3.28410000 | 1.40610000  |

#### TS4

|   |             |             |             |
|---|-------------|-------------|-------------|
| C | 4.76750000  | -1.25930000 | -0.83380000 |
| C | 5.61770000  | -2.07030000 | -1.64170000 |
| C | 6.10770000  | -3.30780000 | -1.19570000 |
| C | 5.73240000  | -3.72780000 | 0.07990000  |
| C | 4.89600000  | -2.93720000 | 0.89740000  |
| C | 4.41400000  | -1.70730000 | 0.45390000  |
| C | 4.45320000  | -0.07700000 | -1.59970000 |
| C | 5.10850000  | -0.21650000 | -2.80950000 |
| H | 6.75980000  | -3.91730000 | -1.82540000 |
| H | 6.09870000  | -4.68790000 | 0.45270000  |
| H | 4.62810000  | -3.29550000 | 1.89440000  |
| H | 3.77280000  | -1.09870000 | 1.09050000  |
| H | 5.12860000  | 0.45860000  | -3.66430000 |
| H | 6.38180000  | -1.72630000 | -3.60090000 |
| N | 5.80260000  | -1.40370000 | -2.83340000 |
| C | 3.53200000  | 1.02900000  | -1.18740000 |
| H | 3.62560000  | 1.87900000  | -1.87770000 |
| H | 3.78920000  | 1.39670000  | -0.18040000 |
| C | 2.07160000  | 0.55000000  | -1.18260000 |
| H | 1.78230000  | 0.23850000  | -2.19210000 |
| H | 1.95350000  | -0.31740000 | -0.51750000 |
| C | -1.22560000 | 2.61790000  | 0.06970000  |
| C | -0.81030000 | 2.95710000  | -1.22300000 |
| C | -1.50050000 | 3.93440000  | -1.94520000 |
| C | -2.54940000 | 4.61140000  | -1.31380000 |
| C | -2.89290000 | 4.33850000  | 0.01920000  |



|    |             |             |             |
|----|-------------|-------------|-------------|
| C  | -2.20300000 | 3.35820000  | 0.74420000  |
| H  | -1.19000000 | 4.18130000  | -2.96260000 |
| H  | -3.08360000 | 5.39640000  | -1.85480000 |
| H  | -3.70260000 | 4.89060000  | 0.49610000  |
| H  | -2.46870000 | 3.14640000  | 1.78490000  |
| C  | 0.40090000  | 2.27440000  | -1.77500000 |
| N  | 1.11410000  | 1.58820000  | -0.77640000 |
| O  | 0.71890000  | 2.25620000  | -2.95290000 |
| C  | 0.92720000  | 1.89850000  | 0.57390000  |
| C  | 1.47930000  | 3.13490000  | 1.14200000  |
| C  | 2.25590000  | 3.99830000  | 0.34340000  |
| C  | 1.22420000  | 3.48550000  | 2.48610000  |
| C  | 2.76600000  | 5.17870000  | 0.87970000  |
| H  | 2.47370000  | 3.73410000  | -0.69140000 |
| C  | 1.73920000  | 4.66290000  | 3.01390000  |
| H  | 0.60360000  | 2.84220000  | 3.11130000  |
| C  | 2.51070000  | 5.51680000  | 2.21280000  |
| H  | 3.37440000  | 5.83740000  | 0.25470000  |
| H  | 1.53510000  | 4.92830000  | 4.05450000  |
| H  | 2.91530000  | 6.44090000  | 2.63130000  |
| C  | 0.74910000  | 0.68490000  | 1.47030000  |
| O  | -0.26030000 | -0.05420000 | 1.34610000  |
| N  | 1.69810000  | 0.40870000  | 2.34860000  |
| C  | 1.65490000  | -0.66410000 | 3.39200000  |
| C  | 3.02280000  | -0.63270000 | 4.07530000  |
| H  | 3.04780000  | -1.37170000 | 4.88830000  |
| H  | 3.82910000  | -0.87590000 | 3.36660000  |
| H  | 3.22740000  | 0.35970000  | 4.51230000  |
| C  | 1.40690000  | -2.03740000 | 2.75640000  |
| H  | 2.12700000  | -2.24810000 | 1.95590000  |
| H  | 1.52300000  | -2.81100000 | 3.53280000  |
| H  | 0.39090000  | -2.12170000 | 2.34040000  |
| C  | 0.54270000  | -0.31790000 | 4.39240000  |
| H  | -0.44090000 | -0.29190000 | 3.90200000  |
| H  | 0.51070000  | -1.08210000 | 5.18320000  |
| H  | 0.72740000  | 0.65810000  | 4.86880000  |
| H  | 2.48540000  | 1.05140000  | 2.39130000  |
| Pd | -1.82680000 | 0.46600000  | 0.11070000  |
| P  | -2.52500000 | -1.63770000 | -0.35260000 |
| C  | -3.38220000 | -0.60720000 | -1.55690000 |
| C  | -3.08390000 | -0.60480000 | -2.93600000 |
| C  | -4.08180000 | 0.49390000  | -0.97330000 |
| C  | -3.49890000 | 0.46720000  | -3.71800000 |
| H  | -2.53340000 | -1.43520000 | -3.37920000 |

|   |             |             |             |
|---|-------------|-------------|-------------|
| C | -4.47280000 | 1.57450000  | -1.78790000 |
| H | -4.43080000 | 0.44660000  | 0.06200000  |
| C | -4.17640000 | 1.56140000  | -3.14380000 |
| H | -3.28470000 | 0.46390000  | -4.78820000 |
| H | -5.01650000 | 2.40870000  | -1.34450000 |
| H | -4.47930000 | 2.39690000  | -3.77710000 |
| C | -3.57570000 | -2.48600000 | 0.82120000  |
| C | -4.93780000 | -2.71170000 | 0.55130000  |
| C | -2.99960000 | -2.92570000 | 2.02770000  |
| C | -5.71780000 | -3.38270000 | 1.49250000  |
| H | -5.37780000 | -2.37340000 | -0.39000000 |
| C | -3.79120000 | -3.59720000 | 2.95880000  |
| H | -1.94250000 | -2.74310000 | 2.23610000  |
| C | -5.14870000 | -3.82530000 | 2.68940000  |
| H | -6.77310000 | -3.56810000 | 1.28470000  |
| H | -3.35140000 | -3.94480000 | 3.89420000  |
| H | -5.76440000 | -4.35300000 | 3.42180000  |
| C | -1.23980000 | -2.68710000 | -1.01440000 |
| C | -1.23530000 | -4.07620000 | -0.79230000 |
| C | -0.16940000 | -2.06700000 | -1.68770000 |
| C | -0.15920000 | -4.83410000 | -1.25610000 |
| H | -2.06300000 | -4.55700000 | -0.26510000 |
| C | 0.89840000  | -2.83410000 | -2.14270000 |
| H | -0.18910000 | -0.98810000 | -1.83490000 |
| C | 0.90650000  | -4.21790000 | -1.92190000 |
| H | -0.14780000 | -5.91400000 | -1.08890000 |
| H | 1.73400000  | -2.35420000 | -2.65830000 |
| H | 1.75130000  | -4.81650000 | -2.26680000 |

## X

|   |             |             |             |
|---|-------------|-------------|-------------|
| C | -4.88750000 | 1.21510000  | -0.82840000 |
| C | -5.80040000 | 1.92920000  | -1.66250000 |
| C | -6.26470000 | 3.20920000  | -1.32480000 |
| C | -5.80350000 | 3.77320000  | -0.13700000 |
| C | -4.90430000 | 3.07990000  | 0.70530000  |
| C | -4.44810000 | 1.80880000  | 0.36940000  |
| C | -4.61420000 | -0.04580000 | -1.47580000 |
| C | -5.35210000 | -0.04510000 | -2.64250000 |
| H | -6.96420000 | 3.74440000  | -1.97100000 |
| H | -6.14770000 | 4.76930000  | 0.15170000  |
| H | -4.56920000 | 3.55000000  | 1.63320000  |
| H | -3.75940000 | 1.27140000  | 1.02240000  |
| H | -5.42360000 | -0.80980000 | -3.41440000 |
| H | -6.69000000 | 1.36450000  | -3.51260000 |

|   |             |             |             |
|---|-------------|-------------|-------------|
| N | -6.06250000 | 1.13120000  | -2.75130000 |
| C | -3.65690000 | -1.09840000 | -1.00280000 |
| H | -3.72230000 | -1.98130000 | -1.65490000 |
| H | -3.91740000 | -1.43260000 | 0.01470000  |
| C | -2.21590000 | -0.56200000 | -1.02320000 |
| H | -2.00990000 | -0.18040000 | -2.03090000 |
| H | -2.11610000 | 0.28680000  | -0.33320000 |
| C | 0.62030000  | -2.66520000 | 0.23250000  |
| C | 0.71440000  | -2.80020000 | -1.16260000 |
| C | 1.70080000  | -3.58380000 | -1.76020000 |
| C | 2.62850000  | -4.21600000 | -0.92590000 |
| C | 2.57610000  | -4.04260000 | 0.46470000  |
| C | 1.56670000  | -3.27490000 | 1.06680000  |
| H | 1.73830000  | -3.69120000 | -2.84530000 |
| H | 3.41140000  | -4.84100000 | -1.35990000 |
| H | 3.32100000  | -4.52950000 | 1.09740000  |
| H | 1.50480000  | -3.18820000 | 2.15280000  |
| C | -0.37820000 | -2.00930000 | -1.78980000 |
| N | -1.15480000 | -1.52240000 | -0.75330000 |
| O | -0.54620000 | -1.77610000 | -2.97250000 |
| C | -0.70090000 | -1.95500000 | 0.57970000  |
| C | -1.61790000 | -2.98910000 | 1.25230000  |
| C | -2.44130000 | -3.80790000 | 0.46980000  |
| C | -1.53940000 | -3.22350000 | 2.63470000  |
| C | -3.20100000 | -4.81950000 | 1.06110000  |
| H | -2.48390000 | -3.66190000 | -0.60890000 |
| C | -2.29960000 | -4.23590000 | 3.22470000  |
| H | -0.88470000 | -2.61970000 | 3.26460000  |
| C | -3.13730000 | -5.03330000 | 2.44060000  |
| H | -3.84370000 | -5.44500000 | 0.43760000  |
| H | -2.23300000 | -4.40200000 | 4.30230000  |
| H | -3.73350000 | -5.82320000 | 2.90290000  |
| C | -0.45680000 | -0.69430000 | 1.44450000  |
| O | 0.65510000  | -0.10440000 | 1.39800000  |
| N | -1.43710000 | -0.22820000 | 2.19300000  |
| C | -1.36410000 | 0.95680000  | 3.10500000  |
| C | -2.71610000 | 1.02920000  | 3.81870000  |
| H | -2.72190000 | 1.88190000  | 4.51190000  |
| H | -3.54350000 | 1.16610000  | 3.10700000  |
| H | -2.90500000 | 0.11500000  | 4.40340000  |
| C | -1.11420000 | 2.22760000  | 2.28190000  |
| H | -1.92730000 | 2.40610000  | 1.56560000  |
| H | -1.06120000 | 3.09320000  | 2.95870000  |
| H | -0.16960000 | 2.16770000  | 1.72700000  |

|           |             |             |             |
|-----------|-------------|-------------|-------------|
| C         | -0.24590000 | 0.73720000  | 4.13430000  |
| H         | 0.74290000  | 0.69660000  | 3.65920000  |
| H         | -0.25000000 | 1.56840000  | 4.85490000  |
| H         | -0.40730000 | -0.19710000 | 4.69370000  |
| H         | -2.29610000 | -0.77420000 | 2.21350000  |
| Pd        | 2.09620000  | -0.60980000 | -0.00110000 |
| P         | 2.62200000  | 1.49850000  | -0.47040000 |
| C         | 3.42750000  | 0.53050000  | -1.74090000 |
| C         | 3.04180000  | 0.52110000  | -3.09970000 |
| C         | 4.21140000  | -0.54190000 | -1.20330000 |
| C         | 3.44830000  | -0.53080000 | -3.90780000 |
| H         | 2.43210000  | 1.33160000  | -3.50200000 |
| C         | 4.59240000  | -1.60090000 | -2.04710000 |
| H         | 4.64250000  | -0.46740000 | -0.19920000 |
| C         | 4.20520000  | -1.59690000 | -3.38110000 |
| H         | 3.17000000  | -0.53640000 | -4.96360000 |
| H         | 5.20430000  | -2.41060000 | -1.64730000 |
| H         | 4.50100000  | -2.41930000 | -4.03550000 |
| C         | 3.68900000  | 2.27860000  | 0.72780000  |
| C         | 5.02470000  | 2.58220000  | 0.41120000  |
| C         | 3.16350000  | 2.55680000  | 2.00550000  |
| C         | 5.83110000  | 3.17940000  | 1.38040000  |
| H         | 5.42270000  | 2.36550000  | -0.58180000 |
| C         | 3.98350000  | 3.15340000  | 2.96050000  |
| H         | 2.12750000  | 2.30650000  | 2.24480000  |
| C         | 5.31320000  | 3.46340000  | 2.64830000  |
| H         | 6.86730000  | 3.42790000  | 1.14220000  |
| H         | 3.58660000  | 3.37550000  | 3.95310000  |
| H         | 5.95120000  | 3.93130000  | 3.40140000  |
| C         | 1.20110000  | 2.47500000  | -0.92340000 |
| C         | 1.08010000  | 3.79930000  | -0.46140000 |
| C         | 0.16110000  | 1.87300000  | -1.66180000 |
| C         | -0.08420000 | 4.51370000  | -0.74010000 |
| H         | 1.88380000  | 4.26330000  | 0.11160000  |
| C         | -0.98860000 | 2.60560000  | -1.94250000 |
| H         | 0.24850000  | 0.84060000  | -2.00540000 |
| C         | -1.11600000 | 3.91940000  | -1.47470000 |
| H         | -0.18580000 | 5.53990000  | -0.38170000 |
| H         | -1.79570000 | 2.14670000  | -2.51550000 |
| H         | -2.03060000 | 4.47960000  | -1.68100000 |
| <b>2C</b> |             |             |             |
| C         | -3.50070000 | -0.96510000 | 0.36310000  |
| C         | -4.83040000 | -1.10990000 | -0.13920000 |

|   |             |             |             |
|---|-------------|-------------|-------------|
| C | -5.82470000 | -0.15140000 | 0.10280000  |
| C | -5.47700000 | 0.96430000  | 0.86140000  |
| C | -4.16960000 | 1.12380000  | 1.37440000  |
| C | -3.18230000 | 0.17090000  | 1.13460000  |
| C | -2.74940000 | -2.11670000 | -0.08420000 |
| C | -3.62880000 | -2.88680000 | -0.81620000 |
| H | -6.83620000 | -0.27610000 | -0.29110000 |
| H | -6.23010000 | 1.72960000  | 1.06540000  |
| H | -3.93370000 | 2.00820000  | 1.97160000  |
| H | -2.17800000 | 0.30020000  | 1.54520000  |
| H | -3.45500000 | -3.83100000 | -1.33010000 |
| H | -5.68750000 | -2.66340000 | -1.31600000 |
| N | -4.87210000 | -2.28950000 | -0.84480000 |
| C | -1.28800000 | -2.35600000 | 0.14640000  |
| H | -0.99200000 | -3.35290000 | -0.20570000 |
| H | -1.06450000 | -2.31520000 | 1.22520000  |
| C | -0.45270000 | -1.28870000 | -0.57910000 |
| H | -0.56640000 | -1.42390000 | -1.66860000 |
| H | -0.85750000 | -0.29980000 | -0.34210000 |
| C | 3.13090000  | -0.47480000 | 0.04200000  |
| C | 3.18430000  | -1.82110000 | -0.31770000 |
| C | 4.39410000  | -2.50610000 | -0.42200000 |
| C | 5.57010000  | -1.80200000 | -0.14850000 |
| C | 5.51910000  | -0.44690000 | 0.21530000  |
| C | 4.29820000  | 0.23180000  | 0.31570000  |
| H | 4.41010000  | -3.55920000 | -0.71140000 |
| H | 6.53710000  | -2.30590000 | -0.21820000 |
| H | 6.44850000  | 0.08910000  | 0.42290000  |
| H | 4.27240000  | 1.28540000  | 0.59850000  |
| C | 1.80300000  | -2.30800000 | -0.56840000 |
| N | 0.96170000  | -1.26750000 | -0.23430000 |
| O | 1.44870000  | -3.39610000 | -0.99390000 |
| C | 1.67980000  | -0.01280000 | 0.06230000  |
| C | 1.32320000  | 0.58780000  | 1.42120000  |
| C | 0.66420000  | -0.16940000 | 2.39750000  |
| C | 1.72010000  | 1.89860000  | 1.73930000  |
| C | 0.38170000  | 0.37480000  | 3.65390000  |
| H | 0.37830000  | -1.19590000 | 2.17350000  |
| C | 1.44230000  | 2.44140000  | 2.99540000  |
| H | 2.24000000  | 2.50680000  | 0.99670000  |
| C | 0.76600000  | 1.68320000  | 3.95660000  |
| H | -0.14020000 | -0.23140000 | 4.39840000  |
| H | 1.75450000  | 3.46350000  | 3.22300000  |
| H | 0.54260000  | 2.11040000  | 4.93710000  |

|   |             |            |             |
|---|-------------|------------|-------------|
| C | 1.40600000  | 0.93750000 | -1.16100000 |
| O | 2.02040000  | 0.77570000 | -2.20510000 |
| N | 0.40650000  | 1.82590000 | -0.98130000 |
| C | -0.15300000 | 2.73150000 | -2.00740000 |
| C | -1.24780000 | 3.54250000 | -1.30630000 |
| H | -1.71370000 | 4.24420000 | -2.01350000 |
| H | -2.03700000 | 2.88410000 | -0.90870000 |
| H | -0.82920000 | 4.12650000 | -0.47050000 |
| C | -0.75550000 | 1.90630000 | -3.15400000 |
| H | -1.56070000 | 1.25350000 | -2.78190000 |
| H | -1.18010000 | 2.57370000 | -3.92000000 |
| H | 0.01340000  | 1.27910000 | -3.62560000 |
| C | 0.94520000  | 3.66980000 | -2.52840000 |
| H | 1.74870000  | 3.09760000 | -3.01070000 |
| H | 0.52560000  | 4.37530000 | -3.26220000 |
| H | 1.37930000  | 4.25240000 | -1.70010000 |
| H | -0.02360000 | 1.86260000 | -0.06430000 |

#### IV

|   |             |             |             |
|---|-------------|-------------|-------------|
| C | -5.56880000 | -1.24800000 | -0.47810000 |
| C | -6.26410000 | -2.21760000 | -1.25910000 |
| C | -7.42920000 | -1.91250000 | -1.95710000 |
| C | -7.90790000 | -0.59540000 | -1.86670000 |
| C | -7.24110000 | 0.37720000  | -1.10020000 |
| C | -6.07440000 | 0.06520000  | -0.39960000 |
| C | -4.43160000 | -1.90460000 | 0.10200000  |
| C | -4.47800000 | -3.23030000 | -0.34890000 |
| H | -7.95300000 | -2.66520000 | -2.54940000 |
| H | -8.82080000 | -0.32560000 | -2.40200000 |
| H | -7.64710000 | 1.38970000  | -1.04860000 |
| H | -5.56750000 | 0.81960000  | 0.20400000  |
| H | -3.79970000 | -4.05280000 | -0.12720000 |
| H | -5.82840000 | -4.28670000 | -1.58340000 |
| N | -5.56040000 | -3.40770000 | -1.15050000 |
| C | -3.38100000 | -1.28900000 | 0.96230000  |
| H | -2.88630000 | -2.06860000 | 1.56120000  |
| H | -3.83460000 | -0.57270000 | 1.66410000  |
| C | -2.31750000 | -0.54710000 | 0.12910000  |
| H | -1.86490000 | -1.23630000 | -0.59700000 |
| H | -2.79780000 | 0.24690000  | -0.45470000 |
| C | 0.58440000  | -1.89240000 | -0.16250000 |
| C | -0.02980000 | -1.95950000 | 1.08610000  |
| C | -0.15710000 | -3.20770000 | 1.69930000  |
| C | 0.29170000  | -4.35640000 | 1.03710000  |

|    |             |             |             |
|----|-------------|-------------|-------------|
| C  | 0.87420000  | -4.26710000 | -0.23110000 |
| C  | 1.02040000  | -3.02020000 | -0.85950000 |
| H  | -0.61180000 | -3.27310000 | 2.69010000  |
| H  | 0.17870000  | -5.33270000 | 1.51320000  |
| H  | 1.22130000  | -5.16510000 | -0.74700000 |
| H  | 1.48600000  | -2.95870000 | -1.84660000 |
| C  | -0.40980000 | -0.65010000 | 1.71060000  |
| N  | -1.29760000 | 0.07390000  | 0.97220000  |
| O  | 0.17350000  | -0.22630000 | 2.69830000  |
| C  | -1.23200000 | 1.52130000  | 1.05700000  |
| H  | -0.43730000 | 1.73800000  | 1.78560000  |
| C  | -2.51430000 | 2.12360000  | 1.61500000  |
| C  | -2.72290000 | 2.02360000  | 2.99930000  |
| C  | -3.52610000 | 2.66820000  | 0.81370000  |
| C  | -3.91730000 | 2.46190000  | 3.57370000  |
| H  | -1.94110000 | 1.58760000  | 3.62650000  |
| C  | -4.72080000 | 3.11240000  | 1.38890000  |
| H  | -3.38510000 | 2.76070000  | -0.26290000 |
| C  | -4.92150000 | 3.00930000  | 2.76800000  |
| H  | -4.06390000 | 2.38030000  | 4.65330000  |
| H  | -5.49870000 | 3.54190000  | 0.75310000  |
| H  | -5.85510000 | 3.35900000  | 3.21510000  |
| C  | -0.77060000 | 2.14540000  | -0.26900000 |
| O  | -0.96830000 | 3.34130000  | -0.44560000 |
| N  | -0.22290000 | 1.34580000  | -1.25060000 |
| C  | 0.02260000  | 1.93790000  | -2.60760000 |
| C  | -1.35100000 | 2.30800000  | -3.20490000 |
| H  | -1.20930000 | 2.63760000  | -4.24530000 |
| H  | -2.02400000 | 1.43700000  | -3.20610000 |
| H  | -1.81760000 | 3.12280000  | -2.63870000 |
| C  | 0.64010000  | 0.85640000  | -3.51130000 |
| H  | 0.03250000  | -0.06350000 | -3.54590000 |
| H  | 0.71640000  | 1.23950000  | -4.53880000 |
| H  | 1.68050000  | 0.60470000  | -3.22310000 |
| C  | 0.97670000  | 3.14120000  | -2.59710000 |
| H  | 1.94700000  | 2.86310000  | -2.16420000 |
| H  | 1.15060000  | 3.47380000  | -3.63160000 |
| H  | 0.56360000  | 3.97470000  | -2.02180000 |
| Pd | 1.09580000  | -0.24150000 | -1.12110000 |
| P  | 3.04550000  | 0.01080000  | 0.14000000  |
| C  | 3.33400000  | 1.77790000  | -0.01670000 |
| C  | 2.45850000  | 2.66120000  | 0.64370000  |
| C  | 4.37650000  | 2.27330000  | -0.81920000 |
| C  | 2.63220000  | 4.03440000  | 0.50590000  |

|   |            |             |             |
|---|------------|-------------|-------------|
| H | 1.65720000 | 2.27110000  | 1.27010000  |
| C | 4.53660000 | 3.65330000  | -0.95270000 |
| H | 5.05930000 | 1.59180000  | -1.32820000 |
| C | 3.66690000 | 4.53060000  | -0.29720000 |
| H | 1.95010000 | 4.71950000  | 1.01260000  |
| H | 5.34700000 | 4.04430000  | -1.57130000 |
| H | 3.79440000 | 5.60920000  | -0.41290000 |
| C | 4.25460000 | -0.93800000 | -0.81660000 |
| C | 4.16760000 | -0.97890000 | -2.22350000 |
| C | 5.29980000 | -1.61450000 | -0.15910000 |
| C | 5.11340000 | -1.68720000 | -2.96050000 |
| H | 3.36190000 | -0.45430000 | -2.74060000 |
| C | 6.24420000 | -2.31580000 | -0.90850000 |
| H | 5.38700000 | -1.57950000 | 0.92670000  |
| C | 6.15060000 | -2.35900000 | -2.30350000 |
| H | 5.04140000 | -1.71560000 | -4.04950000 |
| H | 7.06160000 | -2.82860000 | -0.39750000 |
| H | 6.89140000 | -2.91520000 | -2.88200000 |
| C | 3.10820000 | -0.52660000 | 1.84660000  |
| C | 3.32870000 | 0.39430000  | 2.88680000  |
| C | 2.97950000 | -1.90160000 | 2.12990000  |
| C | 3.42240000 | -0.06370000 | 4.19900000  |
| H | 3.44620000 | 1.45680000  | 2.67830000  |
| C | 3.07980000 | -2.34480000 | 3.44390000  |
| H | 2.81340000 | -2.62070000 | 1.32710000  |
| C | 3.29410000 | -1.42720000 | 4.47980000  |
| H | 3.60050000 | 0.64940000  | 5.00630000  |
| H | 2.98310000 | -3.40980000 | 3.66410000  |
| H | 3.36410000 | -1.77850000 | 5.51160000  |

**TS3**

|   |             |             |             |
|---|-------------|-------------|-------------|
| C | -4.75930000 | -2.51720000 | -0.02510000 |
| C | -5.46890000 | -3.70020000 | -0.35230000 |
| C | -6.86450000 | -3.77330000 | -0.26330000 |
| C | -7.54310000 | -2.63400000 | 0.17750000  |
| C | -6.84510000 | -1.45390000 | 0.52340000  |
| C | -5.45800000 | -1.37940000 | 0.43320000  |
| C | -3.36540000 | -2.80080000 | -0.19710000 |
| C | -3.27530000 | -4.10640000 | -0.60470000 |
| H | -7.40590000 | -4.68640000 | -0.51540000 |
| H | -8.63220000 | -2.65760000 | 0.26220000  |
| H | -7.41090000 | -0.59000000 | 0.88050000  |
| H | -4.92860000 | -0.47260000 | 0.74250000  |
| H | -2.39750000 | -4.70710000 | -0.83530000 |
| H | -4.74340000 | -5.59630000 | -1.00940000 |



|   |             |             |             |
|---|-------------|-------------|-------------|
| N | -4.53800000 | -4.64660000 | -0.72200000 |
| C | -2.28000000 | -1.79280000 | -0.05960000 |
| H | -1.32940000 | -2.29440000 | 0.15790000  |
| H | -2.50990000 | -1.13700000 | 0.79440000  |
| C | -2.09040000 | -0.92620000 | -1.34020000 |
| H | -1.32310000 | -1.35930000 | -1.99550000 |
| H | -3.03830000 | -0.86770000 | -1.89620000 |
| C | -0.51230000 | 3.03880000  | 0.21850000  |
| C | 0.06530000  | 2.13710000  | -0.66500000 |
| C | 1.19270000  | 2.62600000  | -1.30170000 |
| C | 1.65220000  | 3.92830000  | -1.10120000 |
| C | 0.99430000  | 4.75620000  | -0.18410000 |
| C | -0.11540000 | 4.32980000  | 0.53060000  |
| H | 1.60370000  | 2.02710000  | -2.11580000 |
| H | 2.49530000  | 4.30030000  | -1.68810000 |
| H | 1.31140000  | 5.78830000  | -0.05380000 |
| H | -0.65140000 | 4.91360000  | 1.23040000  |
| C | -0.38560000 | 0.77150000  | -0.92520000 |
| N | -1.69330000 | 0.45590000  | -1.06010000 |
| O | 0.51290000  | -0.10650000 | -1.15850000 |
| C | -2.78040000 | 1.40720000  | -0.72740000 |
| H | -3.72340000 | 0.88170000  | -0.91490000 |
| C | -2.75920000 | 2.67060000  | -1.57660000 |
| C | -3.39890000 | 3.83170000  | -1.08330000 |
| C | -2.20590000 | 2.68640000  | -2.85470000 |
| C | -3.42570000 | 4.99720000  | -1.84450000 |
| H | -3.83950000 | 3.82620000  | -0.08980000 |
| C | -2.24290000 | 3.85770000  | -3.61720000 |
| H | -1.73820000 | 1.78390000  | -3.26420000 |
| C | -2.83470000 | 5.01920000  | -3.11070000 |
| H | -3.89710000 | 5.89940000  | -1.44100000 |
| H | -1.79640000 | 3.86000000  | -4.61320000 |
| H | -2.85070000 | 5.93070000  | -3.70620000 |
| C | -2.79340000 | 1.60400000  | 0.82680000  |
| O | -3.72310000 | 1.15510000  | 1.48700000  |
| N | -1.79230000 | 2.18300000  | 1.48320000  |
| C | -1.46340000 | 1.83200000  | 2.92900000  |
| C | -2.34320000 | 2.68450000  | 3.86750000  |
| H | -2.17890000 | 2.38950000  | 4.91420000  |
| H | -2.10800000 | 3.75220000  | 3.75600000  |
| H | -3.41230000 | 2.53560000  | 3.63560000  |
| C | 0.01250000  | 2.09640000  | 3.21490000  |
| H | 0.31610000  | 3.13620000  | 3.08460000  |
| H | 0.20980000  | 1.83750000  | 4.25860000  |

|           |             |             |             |
|-----------|-------------|-------------|-------------|
| H         | 0.64990000  | 1.45640000  | 2.57650000  |
| C         | -1.66820000 | 0.32990000  | 3.19910000  |
| H         | -1.11060000 | -0.26650000 | 2.45660000  |
| H         | -1.27570000 | 0.08630000  | 4.19580000  |
| H         | -2.72760000 | 0.04940000  | 3.15420000  |
| Pd        | 2.21540000  | 0.67470000  | -0.15260000 |
| P         | 3.18710000  | -1.30210000 | 0.08340000  |
| C         | 4.12390000  | -0.44260000 | 1.35430000  |
| C         | 3.43740000  | 0.04160000  | 2.50310000  |
| C         | 5.47780000  | -0.06410000 | 1.13980000  |
| C         | 4.10480000  | 0.86650000  | 3.40830000  |
| H         | 2.39700000  | -0.23530000 | 2.70700000  |
| C         | 6.13260000  | 0.73210000  | 2.07740000  |
| H         | 6.02820000  | -0.44250000 | 0.27440000  |
| C         | 5.44650000  | 1.20090000  | 3.20990000  |
| H         | 3.57000000  | 1.23400000  | 4.29490000  |
| H         | 7.18280000  | 0.98320000  | 1.93610000  |
| H         | 5.96010000  | 1.82930000  | 3.93960000  |
| C         | 4.13850000  | -1.77150000 | -1.36490000 |
| C         | 4.65400000  | -0.74260000 | -2.17320000 |
| C         | 4.37070000  | -3.12070000 | -1.67760000 |
| C         | 5.37830000  | -1.05980000 | -3.32720000 |
| H         | 4.48070000  | 0.30160000  | -1.87210000 |
| C         | 5.11670000  | -3.42610000 | -2.81970000 |
| H         | 3.97260000  | -3.90560000 | -1.04380000 |
| C         | 5.60600000  | -2.40400000 | -3.64330000 |
| H         | 5.77080000  | -0.26630000 | -3.95930000 |
| H         | 5.31410000  | -4.47030000 | -3.07820000 |
| H         | 6.17590000  | -2.65870000 | -4.53760000 |
| C         | 2.01720000  | -2.57010000 | 0.57130000  |
| C         | 1.78340000  | -2.88550000 | 1.91740000  |
| C         | 1.23080000  | -3.16460000 | -0.43780000 |
| C         | 0.77110000  | -3.77860000 | 2.25150000  |
| H         | 2.36370000  | -2.39210000 | 2.70090000  |
| C         | 0.24920000  | -4.07200000 | -0.08760000 |
| H         | 1.39030000  | -2.90240000 | -1.48920000 |
| C         | 0.00890000  | -4.37280000 | 1.25240000  |
| H         | 0.58270000  | -4.00770000 | 3.30200000  |
| H         | -0.34400000 | -4.57110000 | -0.86480000 |
| H         | -0.78320000 | -5.07170000 | 1.51470000  |
| <b>XI</b> |             |             |             |
| C         | -4.65970000 | -2.73480000 | 0.11460000  |
| C         | -5.31000000 | -3.94880000 | -0.25990000 |

|   |             |             |             |
|---|-------------|-------------|-------------|
| C | -6.67080000 | -4.17160000 | -0.00610000 |
| C | -7.38160000 | -3.15620000 | 0.62940000  |
| C | -6.75560000 | -1.94710000 | 1.00900000  |
| C | -5.40380000 | -1.72600000 | 0.76020000  |
| C | -3.27640000 | -2.85450000 | -0.28640000 |
| C | -3.15100000 | -4.09670000 | -0.87840000 |
| H | -7.15440000 | -5.10730000 | -0.29560000 |
| H | -8.44420000 | -3.29840000 | 0.84110000  |
| H | -7.34570000 | -1.17560000 | 1.50970000  |
| H | -4.92800000 | -0.79200000 | 1.07070000  |
| H | -2.27890000 | -4.57290000 | -1.31960000 |
| H | -4.52930000 | -5.68160000 | -1.22010000 |
| N | -4.36400000 | -4.74900000 | -0.85930000 |
| C | -2.25260000 | -1.76960000 | -0.15140000 |
| H | -1.24890000 | -2.18100000 | 0.02620000  |
| H | -2.51040000 | -1.16050000 | 0.72700000  |
| C | -2.20940000 | -0.85510000 | -1.39620000 |
| H | -1.53200000 | -1.25940000 | -2.15820000 |
| H | -3.20810000 | -0.76640000 | -1.84090000 |
| C | -0.57690000 | 2.83300000  | 0.48430000  |
| C | -0.08860000 | 2.22630000  | -0.69200000 |
| C | 0.79160000  | 2.92860000  | -1.54540000 |
| C | 1.15070000  | 4.24250000  | -1.24500000 |
| C | 0.62400000  | 4.85800000  | -0.10450000 |
| C | -0.23270000 | 4.16210000  | 0.75010000  |
| H | 1.13190000  | 2.45800000  | -2.47020000 |
| H | 1.81210000  | 4.79320000  | -1.91600000 |
| H | 0.87480000  | 5.89680000  | 0.11950000  |
| H | -0.64040000 | 4.64630000  | 1.63730000  |
| C | -0.49760000 | 0.84970000  | -1.07810000 |
| N | -1.77920000 | 0.51660000  | -1.07600000 |
| O | 0.42680000  | 0.02920000  | -1.39400000 |
| C | -2.80600000 | 1.43780000  | -0.54430000 |
| H | -3.74980000 | 0.88310000  | -0.61180000 |
| C | -2.97670000 | 2.73700000  | -1.31790000 |
| C | -3.60400000 | 3.82300000  | -0.69290000 |
| C | -2.58290000 | 2.84860000  | -2.65610000 |
| C | -3.81750000 | 5.01220000  | -1.39240000 |
| H | -3.93150000 | 3.74350000  | 0.34660000  |
| C | -2.79650000 | 4.04000000  | -3.35480000 |
| H | -2.10180000 | 2.00740000  | -3.15860000 |
| C | -3.41000000 | 5.12590000  | -2.72490000 |
| H | -4.30410000 | 5.85290000  | -0.89260000 |
| H | -2.48190000 | 4.11710000  | -4.39820000 |

|    |             |             |             |
|----|-------------|-------------|-------------|
| H  | -3.57420000 | 6.05730000  | -3.27160000 |
| C  | -2.59180000 | 1.59020000  | 0.98170000  |
| O  | -3.45110000 | 1.19560000  | 1.74850000  |
| N  | -1.37560000 | 2.08960000  | 1.39060000  |
| C  | -0.89380000 | 1.86730000  | 2.81670000  |
| C  | -1.70790000 | 2.72620000  | 3.78840000  |
| H  | -1.32570000 | 2.59690000  | 4.81260000  |
| H  | -1.62650000 | 3.79200000  | 3.52490000  |
| H  | -2.76700000 | 2.43980000  | 3.77150000  |
| C  | 0.59710000  | 2.22100000  | 2.91760000  |
| H  | 0.79480000  | 3.29830000  | 2.86550000  |
| H  | 0.97030000  | 1.86330000  | 3.88690000  |
| H  | 1.18330000  | 1.72390000  | 2.12560000  |
| C  | -1.02410000 | 0.36820000  | 3.13430000  |
| H  | -0.43950000 | -0.22980000 | 2.41630000  |
| H  | -0.62370000 | 0.17890000  | 4.14090000  |
| H  | -2.06410000 | 0.02670000  | 3.11210000  |
| Pd | 2.01140000  | 0.76570000  | -0.19040000 |
| P  | 3.09500000  | -1.15520000 | -0.00980000 |
| C  | 4.01240000  | -0.54110000 | 1.40630000  |
| C  | 3.32530000  | -0.23060000 | 2.60580000  |
| C  | 5.39160000  | -0.25900000 | 1.28530000  |
| C  | 4.02170000  | 0.33530000  | 3.67060000  |
| H  | 2.25860000  | -0.43620000 | 2.70460000  |
| C  | 6.07110000  | 0.30380000  | 2.36130000  |
| H  | 5.92340000  | -0.49420000 | 0.36210000  |
| C  | 5.39010000  | 0.60070000  | 3.54980000  |
| H  | 3.49570000  | 0.56850000  | 4.59820000  |
| H  | 7.14000000  | 0.50980000  | 2.27750000  |
| H  | 5.93250000  | 1.04280000  | 4.38840000  |
| C  | 4.13560000  | -1.41760000 | -1.44630000 |
| C  | 4.50970000  | -0.30850000 | -2.22690000 |
| C  | 4.59110000  | -2.70830000 | -1.77010000 |
| C  | 5.34080000  | -0.49380000 | -3.33040000 |
| H  | 4.14590000  | 0.69220000  | -1.97670000 |
| C  | 5.42760000  | -2.87810000 | -2.87320000 |
| H  | 4.30150000  | -3.56900000 | -1.16420000 |
| C  | 5.79870000  | -1.77660000 | -3.65190000 |
| H  | 5.62980000  | 0.36260000  | -3.94290000 |
| H  | 5.79000000  | -3.87650000 | -3.12670000 |
| H  | 6.44910000  | -1.91910000 | -4.51780000 |
| C  | 2.02320000  | -2.55800000 | 0.26710000  |
| C  | 1.79030000  | -3.10140000 | 1.54410000  |
| C  | 1.37930000  | -3.09730000 | -0.86680000 |

|   |             |             |             |
|---|-------------|-------------|-------------|
| C | 0.92140000  | -4.18360000 | 1.67850000  |
| H | 2.29740000  | -2.70380000 | 2.42280000  |
| C | 0.52650000  | -4.18690000 | -0.71670000 |
| H | 1.55080000  | -2.67270000 | -1.85680000 |
| C | 0.29240000  | -4.72720000 | 0.55280000  |
| H | 0.74440000  | -4.61350000 | 2.66630000  |
| H | 0.03890000  | -4.61290000 | -1.59520000 |
| H | -0.38520000 | -5.57580000 | 0.66610000  |

**2B**

|   |             |             |             |
|---|-------------|-------------|-------------|
| C | 4.55150000  | 0.00080000  | -0.10150000 |
| C | 5.85330000  | -0.08000000 | 0.48190000  |
| C | 6.97560000  | 0.50640000  | -0.12080000 |
| C | 6.78340000  | 1.18220000  | -1.32380000 |
| C | 5.50450000  | 1.27140000  | -1.91930000 |
| C | 4.39090000  | 0.68800000  | -1.32080000 |
| C | 3.64760000  | -0.70680000 | 0.77600000  |
| C | 4.41500000  | -1.16850000 | 1.82560000  |
| H | 7.96450000  | 0.43590000  | 0.33850000  |
| H | 7.63840000  | 1.65120000  | -1.81750000 |
| H | 5.39230000  | 1.80720000  | -2.86520000 |
| H | 3.40740000  | 0.75890000  | -1.79230000 |
| H | 4.11430000  | -1.74660000 | 2.69810000  |
| H | 6.49230000  | -1.02870000 | 2.27700000  |
| N | 5.73140000  | -0.79600000 | 1.64970000  |
| C | 2.16440000  | -0.83080000 | 0.60830000  |
| H | 1.78120000  | -1.67670000 | 1.19930000  |
| H | 1.91930000  | -1.03680000 | -0.44670000 |
| C | 1.42280000  | 0.44290000  | 1.05090000  |
| H | 1.57870000  | 0.60170000  | 2.12500000  |
| H | 1.81530000  | 1.31880000  | 0.51470000  |
| C | -2.79330000 | -0.68860000 | 0.28370000  |
| C | -2.28030000 | -0.19750000 | 1.49560000  |
| C | -3.15500000 | 0.33080000  | 2.45640000  |
| C | -4.52040000 | 0.42510000  | 2.20280000  |
| C | -5.02250000 | -0.00850000 | 0.97070000  |
| C | -4.16490000 | -0.55820000 | 0.02050000  |
| H | -2.73520000 | 0.68800000  | 3.39850000  |
| H | -5.18990000 | 0.85090000  | 2.95330000  |
| H | -6.08700000 | 0.08760000  | 0.74480000  |
| H | -4.55330000 | -0.88850000 | -0.94260000 |
| C | -0.81480000 | -0.14710000 | 1.80170000  |
| N | -0.01710000 | 0.37260000  | 0.81490000  |
| O | -0.37710000 | -0.47330000 | 2.89950000  |

|   |             |             |             |
|---|-------------|-------------|-------------|
| C | -0.50600000 | 0.70620000  | -0.52310000 |
| H | 0.37880000  | 1.02070000  | -1.09070000 |
| C | -1.50560000 | 1.85530000  | -0.59740000 |
| C | -2.28600000 | 2.01570000  | -1.75070000 |
| C | -1.62240000 | 2.78940000  | 0.43760000  |
| C | -3.18110000 | 3.08210000  | -1.85890000 |
| H | -2.19940000 | 1.29840000  | -2.57060000 |
| C | -2.51760000 | 3.85720000  | 0.33020000  |
| H | -1.01860000 | 2.67390000  | 1.33920000  |
| C | -3.30260000 | 4.00600000  | -0.81640000 |
| H | -3.78820000 | 3.18920000  | -2.76130000 |
| H | -2.60280000 | 4.57490000  | 1.14990000  |
| H | -4.00690000 | 4.83750000  | -0.89750000 |
| C | -0.93370000 | -0.57960000 | -1.26160000 |
| O | -0.32040000 | -0.92890000 | -2.26000000 |
| N | -1.94460000 | -1.30630000 | -0.68580000 |
| C | -2.17570000 | -2.74540000 | -1.10520000 |
| C | -2.75390000 | -2.79150000 | -2.52530000 |
| H | -2.91250000 | -3.83720000 | -2.83240000 |
| H | -3.72450000 | -2.27420000 | -2.57190000 |
| H | -2.06870000 | -2.31780000 | -3.24010000 |
| C | -3.13440000 | -3.43750000 | -0.12630000 |
| H | -4.15990000 | -3.05220000 | -0.17820000 |
| H | -3.16900000 | -4.50600000 | -0.38420000 |
| H | -2.78500000 | -3.35150000 | 0.91330000  |
| C | -0.83410000 | -3.49690000 | -1.02790000 |
| H | -0.41450000 | -3.42510000 | -0.01230000 |
| H | -1.00170000 | -4.56090000 | -1.25310000 |
| H | -0.10160000 | -3.10350000 | -1.74040000 |

## 10. Reference

1. M.J. Frisch, G.W. Trucks, H.B. Schlegel, G.E. Scuseria, M.A. Robb, J.R. Cheeseman, G. Scalmani, V. Barone, B. Mennucci, G.A. Petersson, H. Nakatsuji, M. Caricato, X. Li, H.P. Hratchian, A.F. Izmaylov, J. Bloino, G. Zheng, J.L. Sonnenberg, M. Hada, M. Ehara, K. Toyota, R. Fukuda, J. Hasegawa, M. Ishida, T. Nakajima, Y. Honda, O. Kitao, H. Nakai, T. Vreven, J.A. Montgomery, J.J.E. Peralta, F. Ogliaro, M. Bearpark, J.J. Heyd, E. Brothers, K.N. Kudin, V.N. Taroverov, T. Keith, R. Kobayashi, J. Normand, K. Raghavachari, A. Rendell, J.C. Burant, S.S. Iyengar, J. Tomasi, M. Cossi, N. Rega, J.M. Millam, M. Klene, J.E. Knox, J.B. Cross, V. Bakken, C. Adamo, J. Jaramillo, R. Gomperts, R.E. Stratmann, O. Yazyev, A. J. Austin, R. Cammi, C. Pomelli, J. W. Ochterski, R.L. Martin, K. Morokuma, V.G. Zakrzewski, G.A. Voth, P. Salvador, J.J. Dannenberg, S. Dapprich, A.D. Daniels, O. Farkas, J.B. Foresman, J.V. Ortiz, J. Cioslowski, D.J. Fox, Gaussian 09 (Revision D.01), I. Gaussian, Wallingford, CT, 2013.
2. Krishnan, R.; Binkley, J. S.; Seeger, R.; Pople, J. A., Self-consistent molecular orbital methods. XX. A basis set for correlated wave functions. *J. Chem. Phys.* **1980**, 72 (1), 650-654.

3. Weigend, F.; Ahlrichs, R., Balanced basis sets of split valence, triple zeta valence and quadruple zeta valence quality for H to Rn: Design and assessment of accuracy. *Phys Chem Chem Phys* **2005**, 7 (18), 3297-305.
4. Xu S., He T., Li J., Huang Z., & Hu C., Enantioselective synthesis of D-lactic acid via chemocatalysis using MgO: Experimental and molecular-based rationalization of the triose's reactivity and preliminary insights with raw biomass. *Appl. Catal. B: Environ.* **2021**, 292:120145.
5. Grimme, S.; Antony, J.; Ehrlich, S.; Krieg, H., A consistent and accurate *ab initio* parametrization of density functional dispersion correction (DFT-D) for the 94 elements H-Pu. *J. Chem. Phys.* **2010**, 132 (15), 154104.
6. Gonzalez, C.; Schlegel, H. B., An improved algorithm for reaction path following. *J. Chem. Phys.* **1989**, 90 (90), 2154-2161.

11. Copies  $^1\text{H}$  NMR,  $^{13}\text{C}$  NMR,  $^{19}\text{F}$

NMRN-(tert-butyl)-2-(1-oxo-3,4-dihydrospiro[benzo[c]azepine-5,3'-indol]-2(1H)-yl)-2-phenylacetamide (2down)

$^1\text{H}$  NMR (400 MHz,  $\text{CDCl}_3$ ):

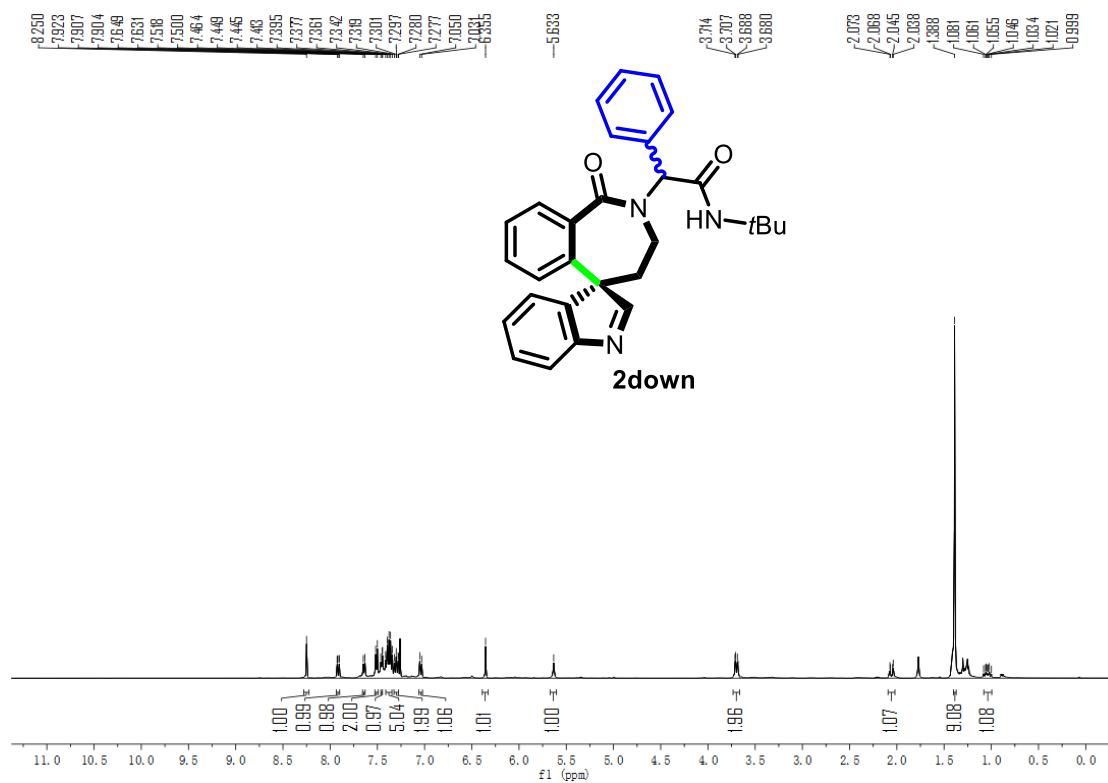

$^{13}\text{C}$  NMR (100 MHz,  $\text{CDCl}_3$ ):



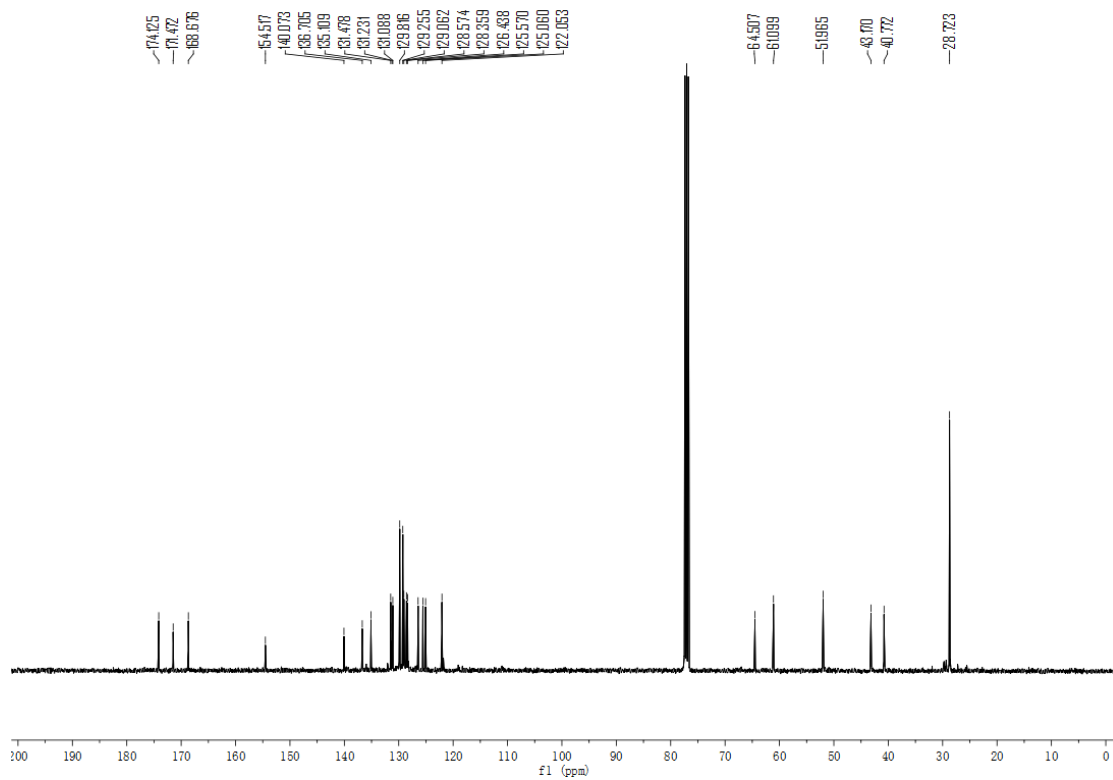

DEPT

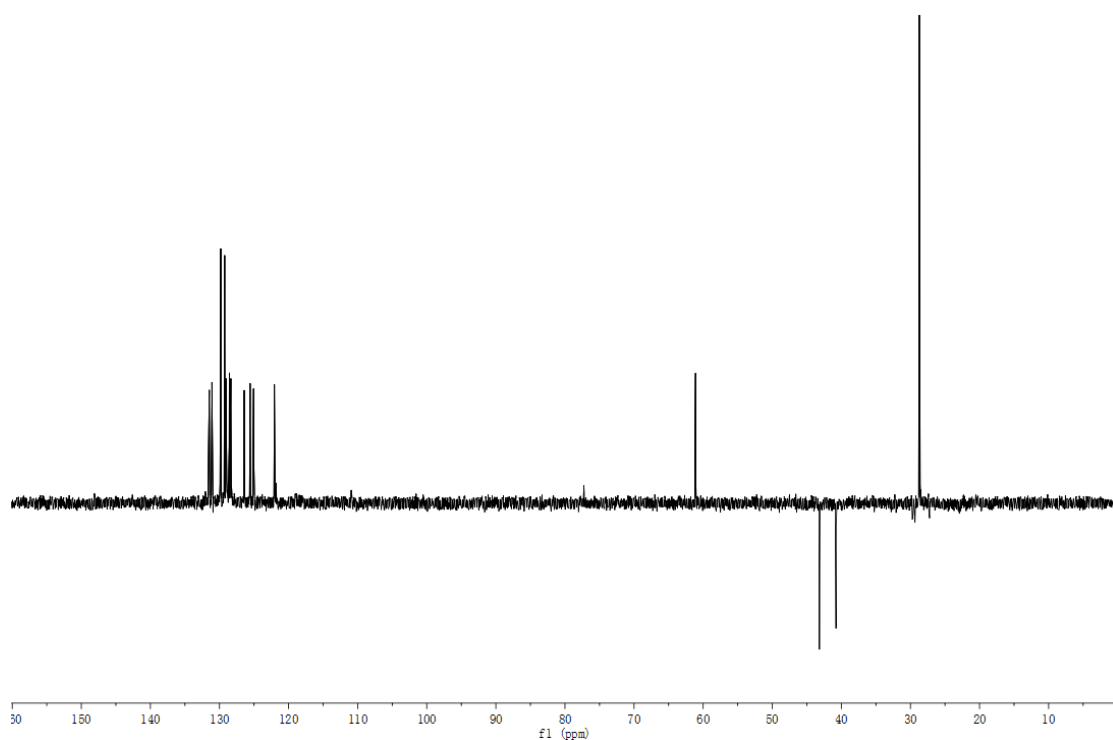

HSQC

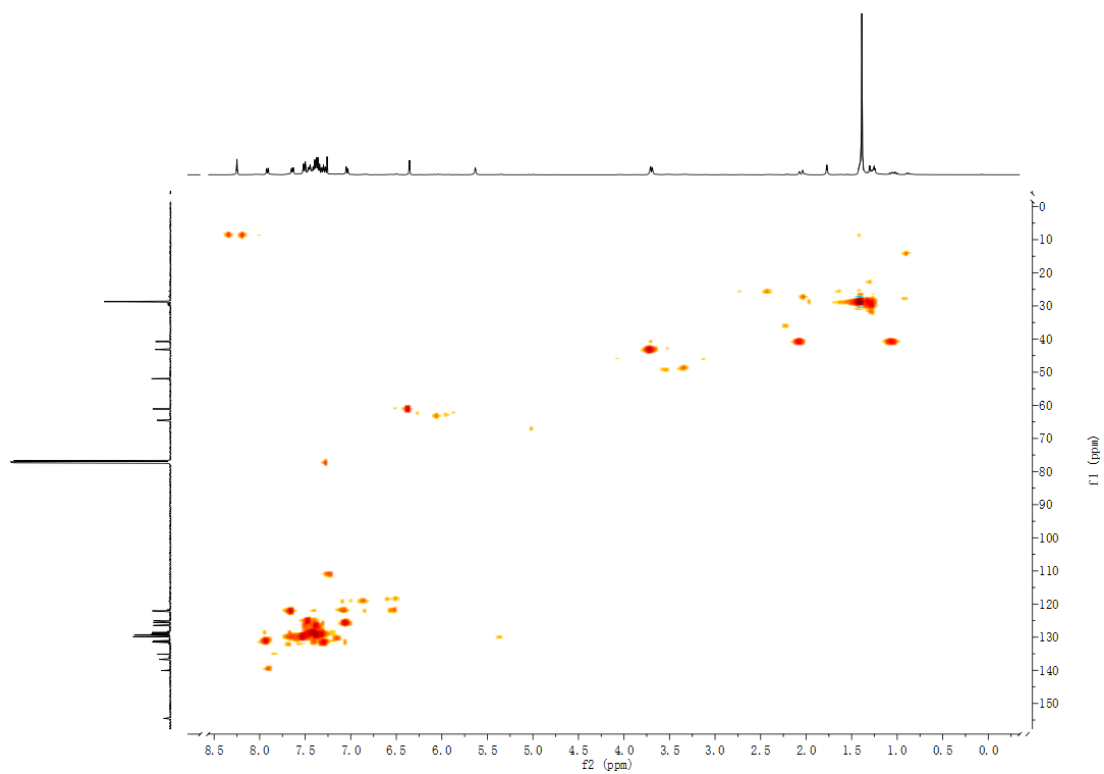

HMBC

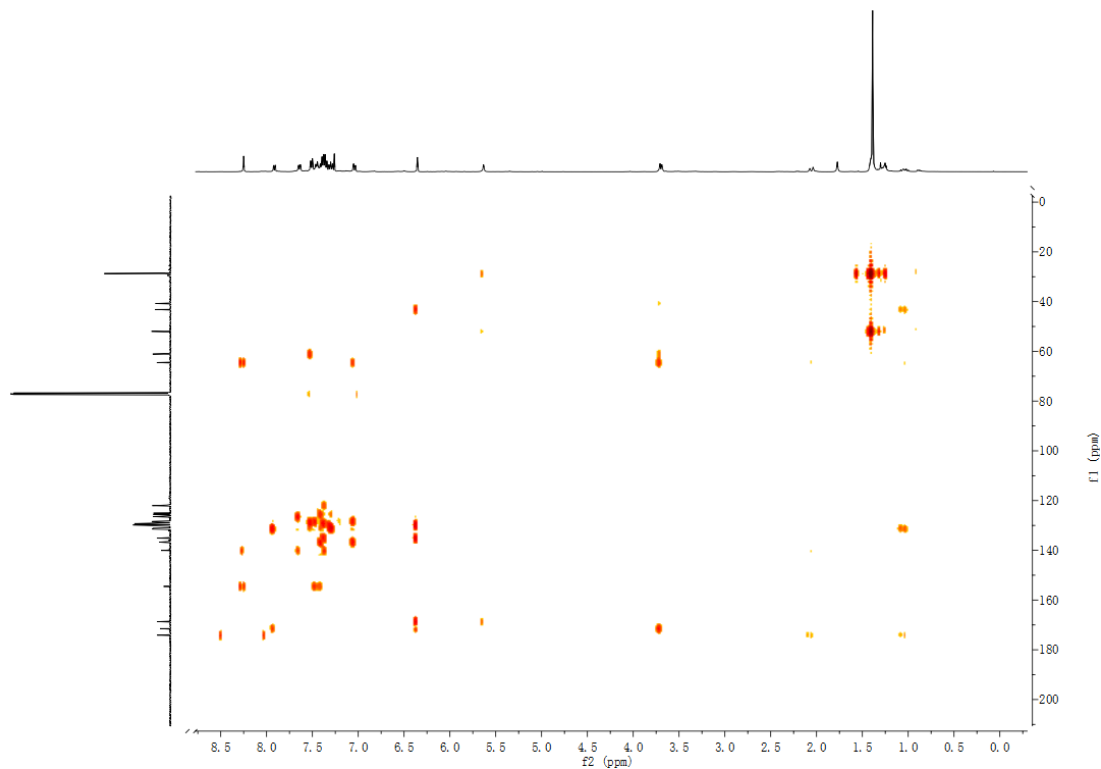

**N-(tert-butyl)-2-(1-oxo-3,4-dihydrospiro[benzo[c]azepine-5,3'-indol]-2(1H)-yl)-2-phenylacetamide (2up)**

**<sup>1</sup>H NMR (400 MHz, CDCl<sub>3</sub>):**

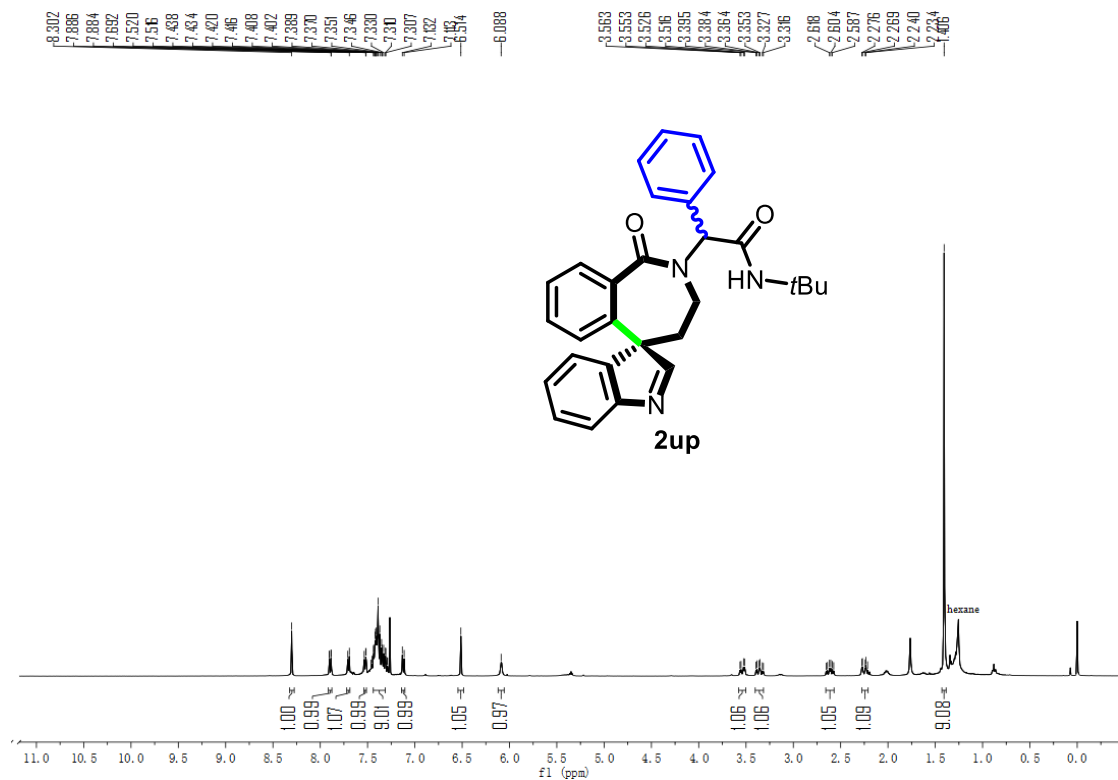

**<sup>13</sup>C NMR (100 MHz, CDCl<sub>3</sub>):**

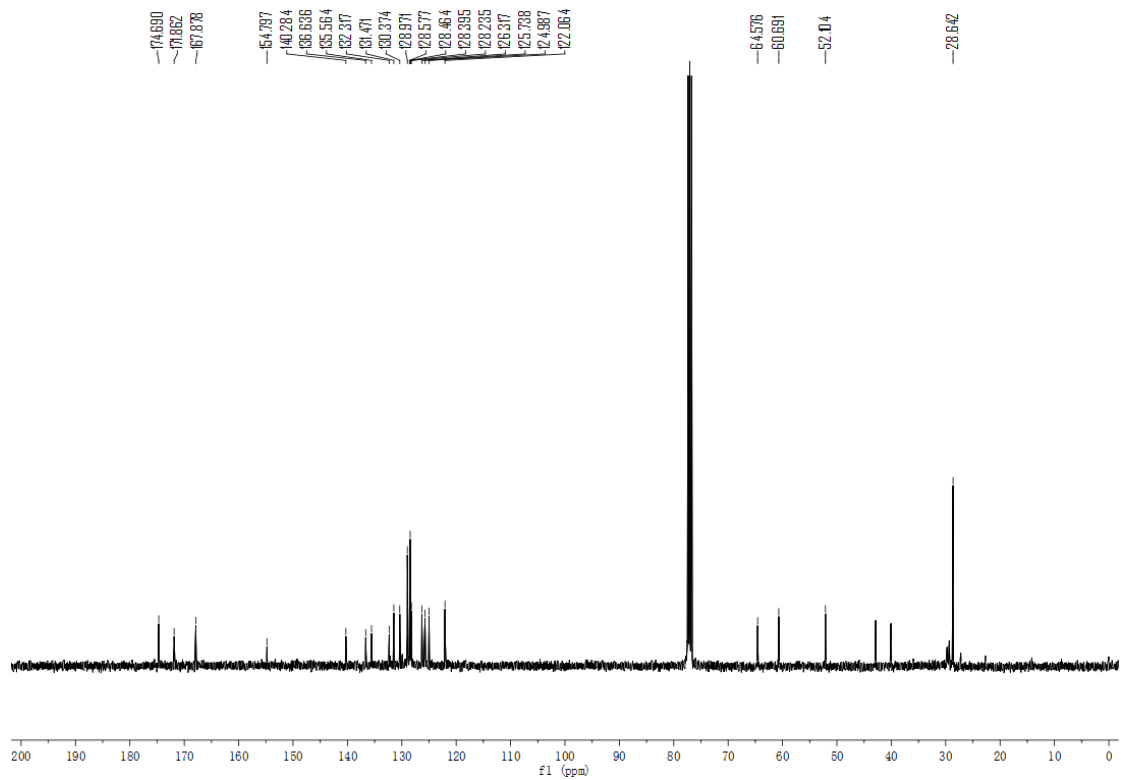

**DEPT**

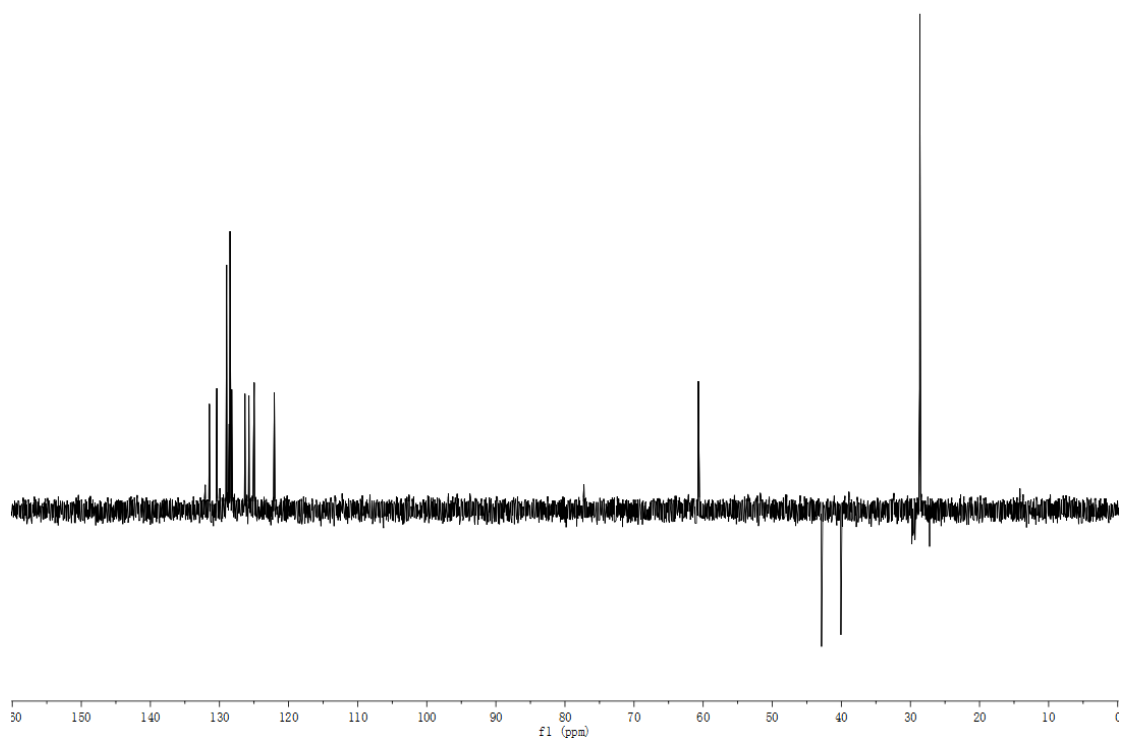

**HSQC**

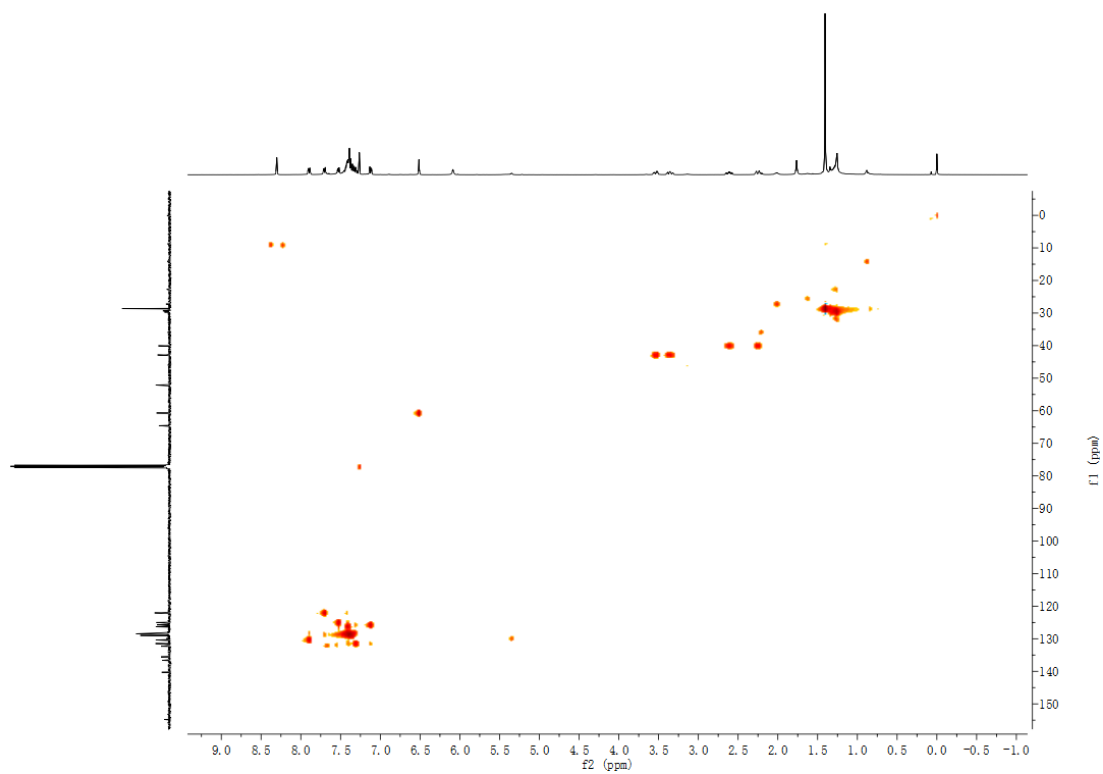

HMBC

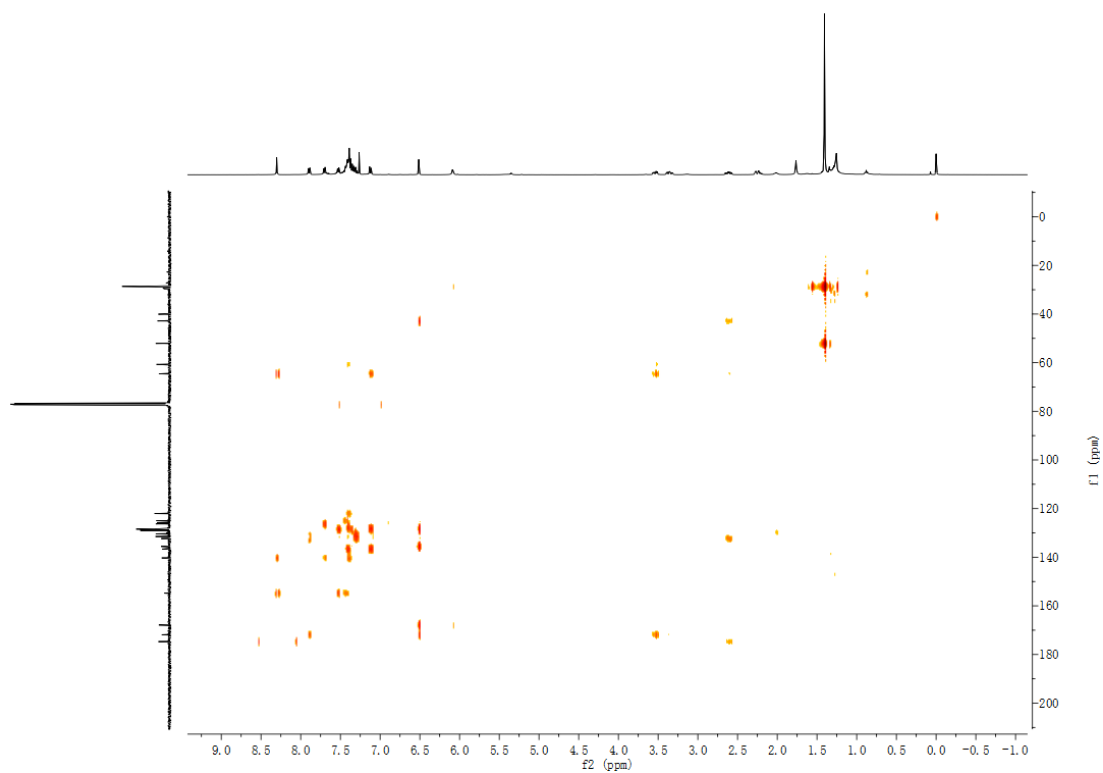

2 crude  $^1\text{H}$  NMR

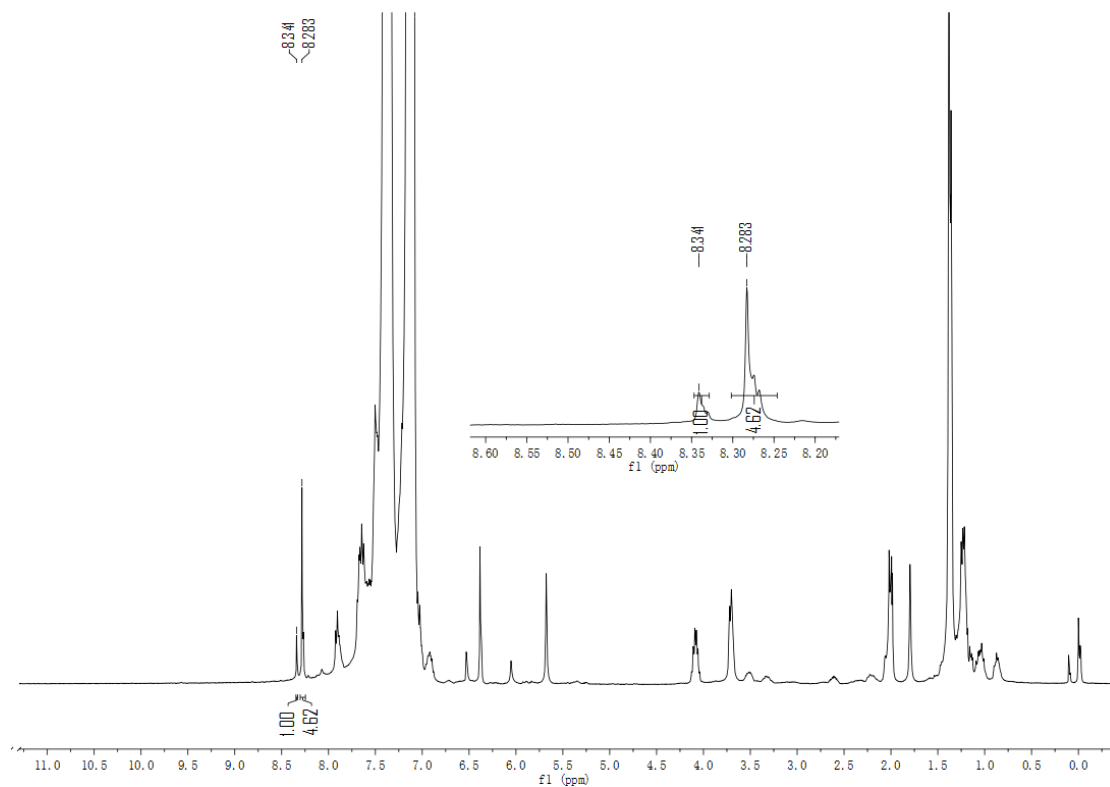

**2-(2-(1H-indol-3-yl)ethyl)-3-phenylisoindolin-1-one (2D)**

**<sup>1</sup>H NMR of 2D (400 MHz, CDCl<sub>3</sub>):**

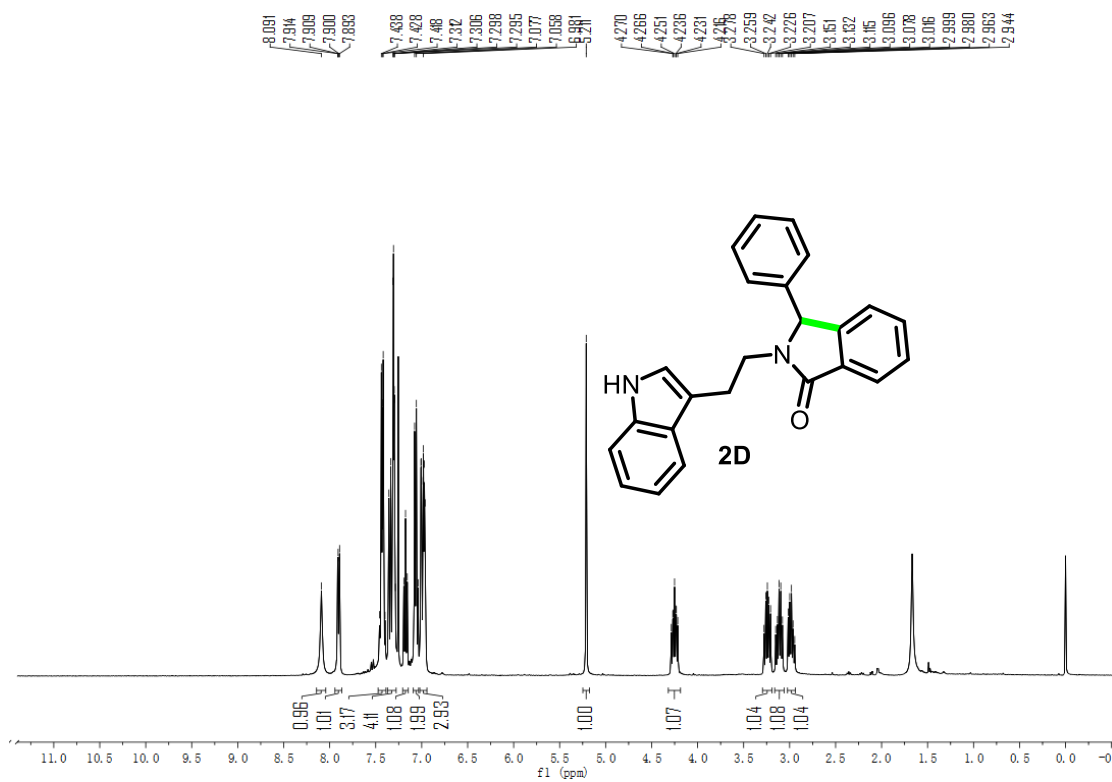

**<sup>13</sup>C NMR of 2D (100 MHz, CDCl<sub>3</sub>):**

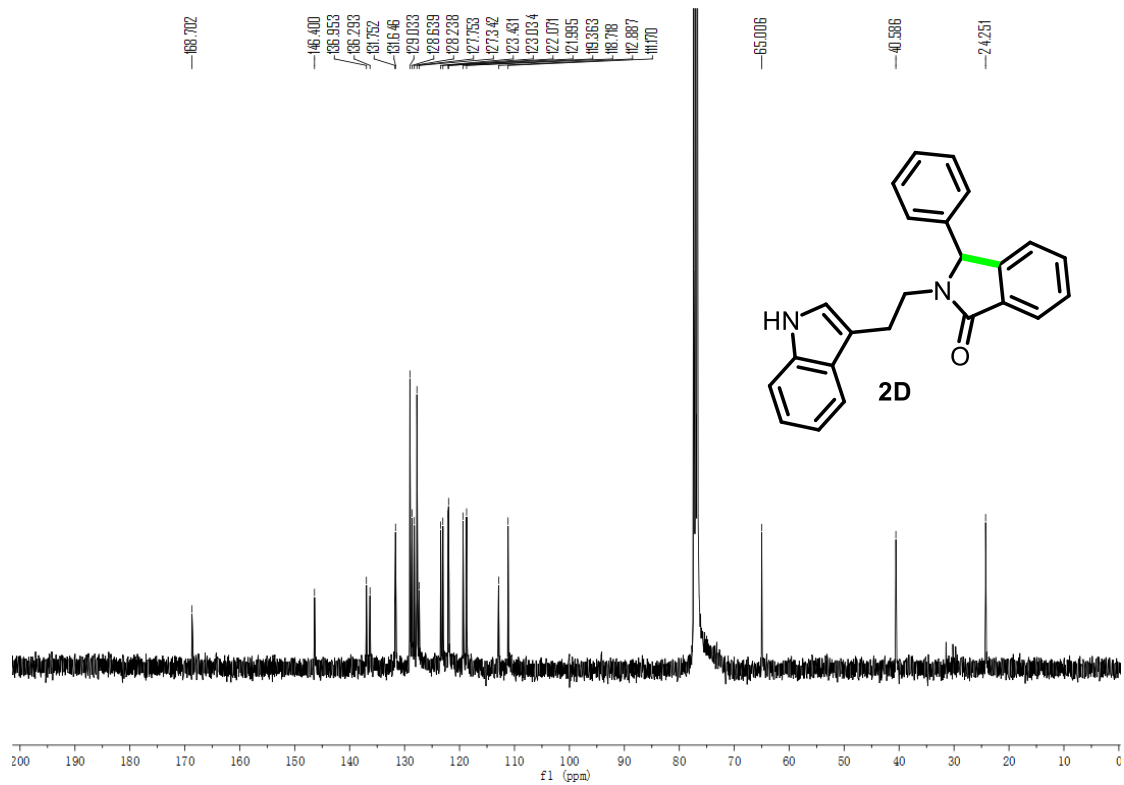

**DEPT of 2D**

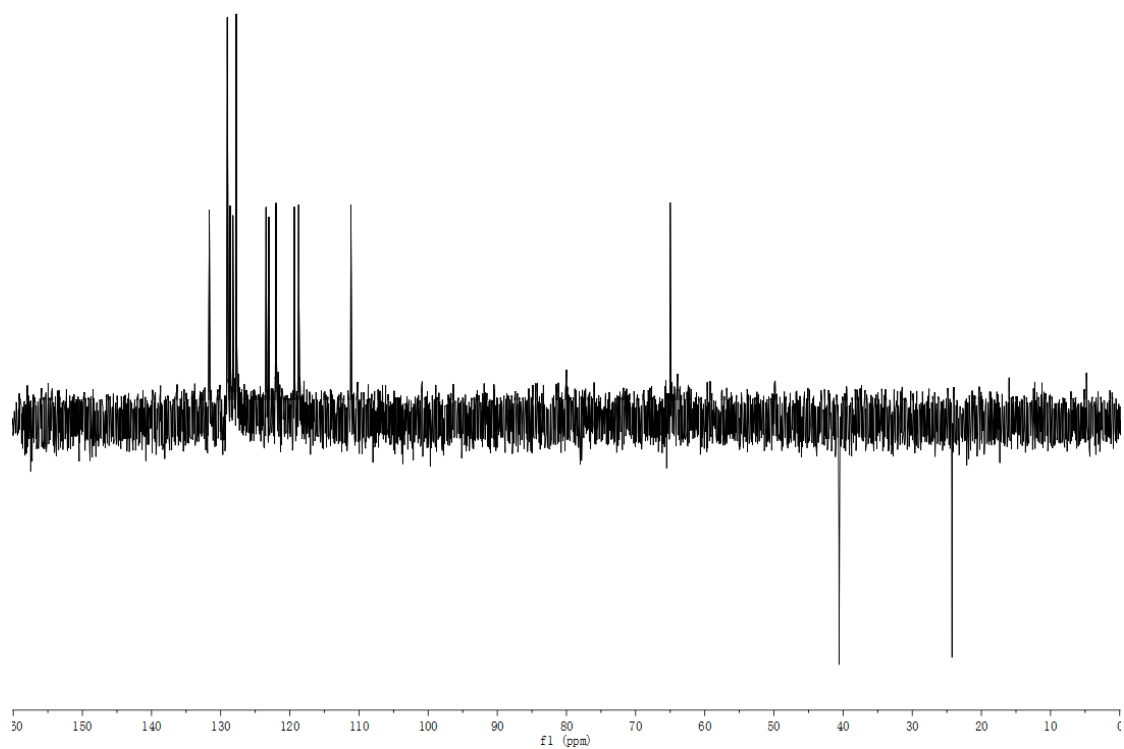

**HSQC of 2D:**

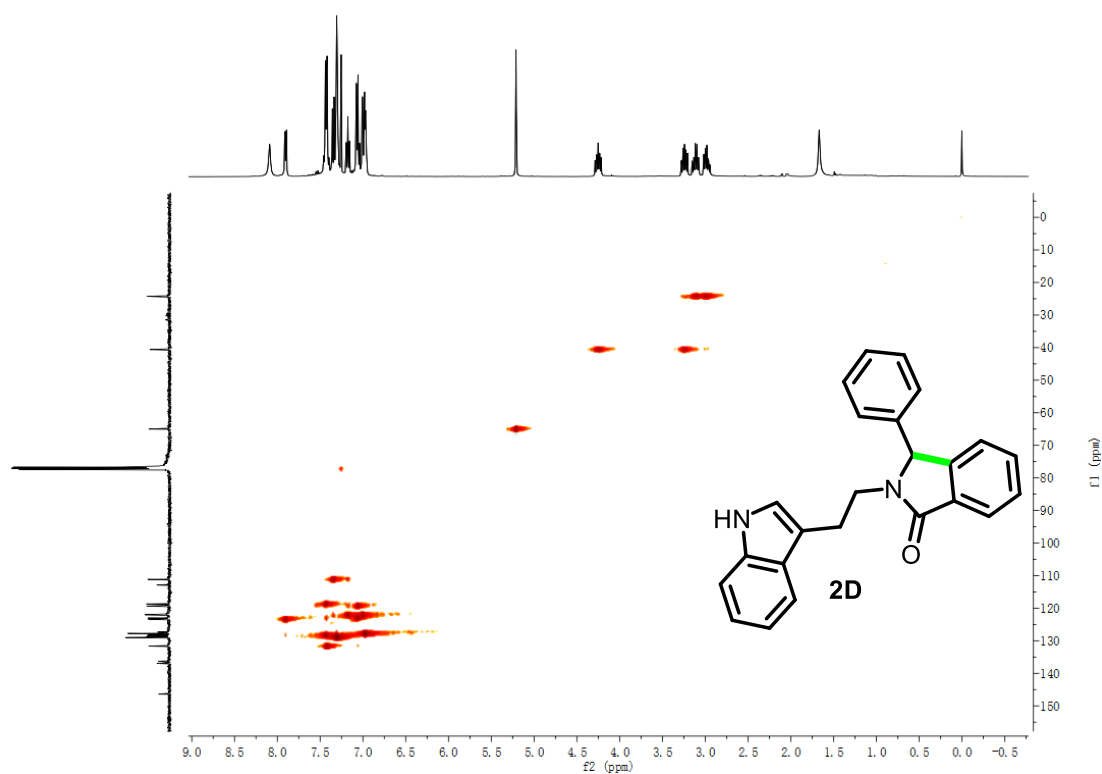

HMBC of 2D:

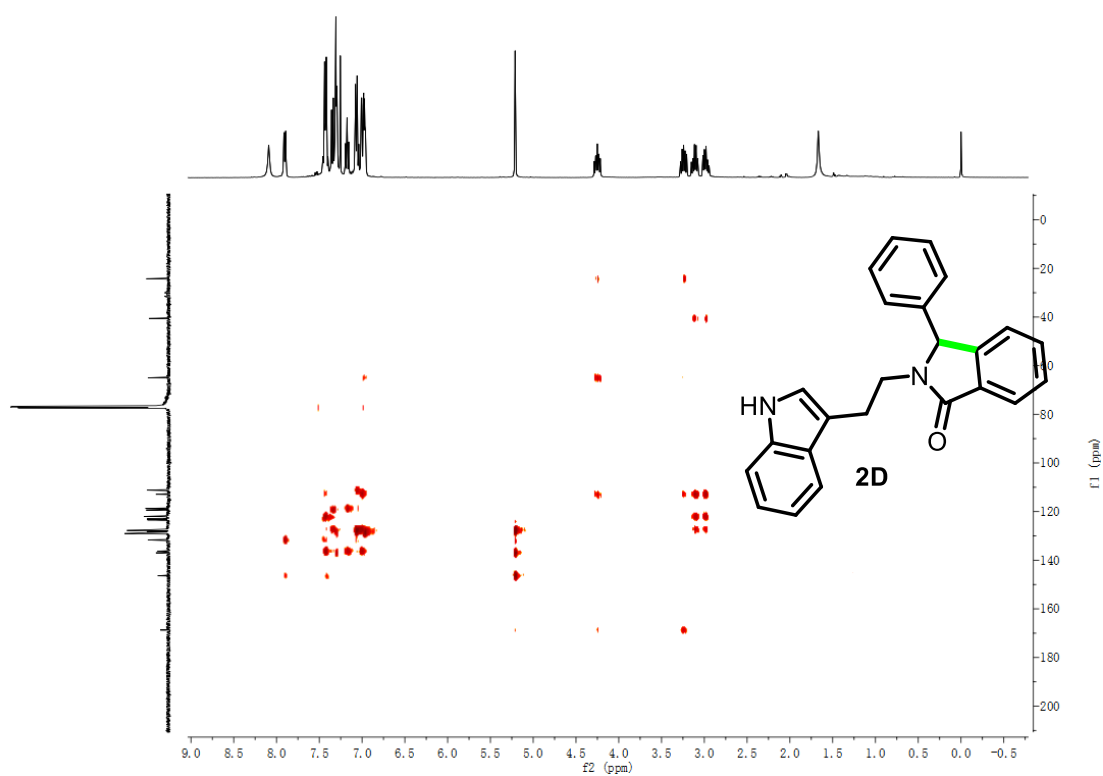

N-(tert-butyl)-2-(5-oxo-5,7,8,13-tetrahydro-6H-benzo[6,7]azocino[5,4-b]indol-6-yl)-2-phenylacetamide (2A)

<sup>1</sup>H NMR of 2A (400 MHz, CDCl<sub>3</sub>):





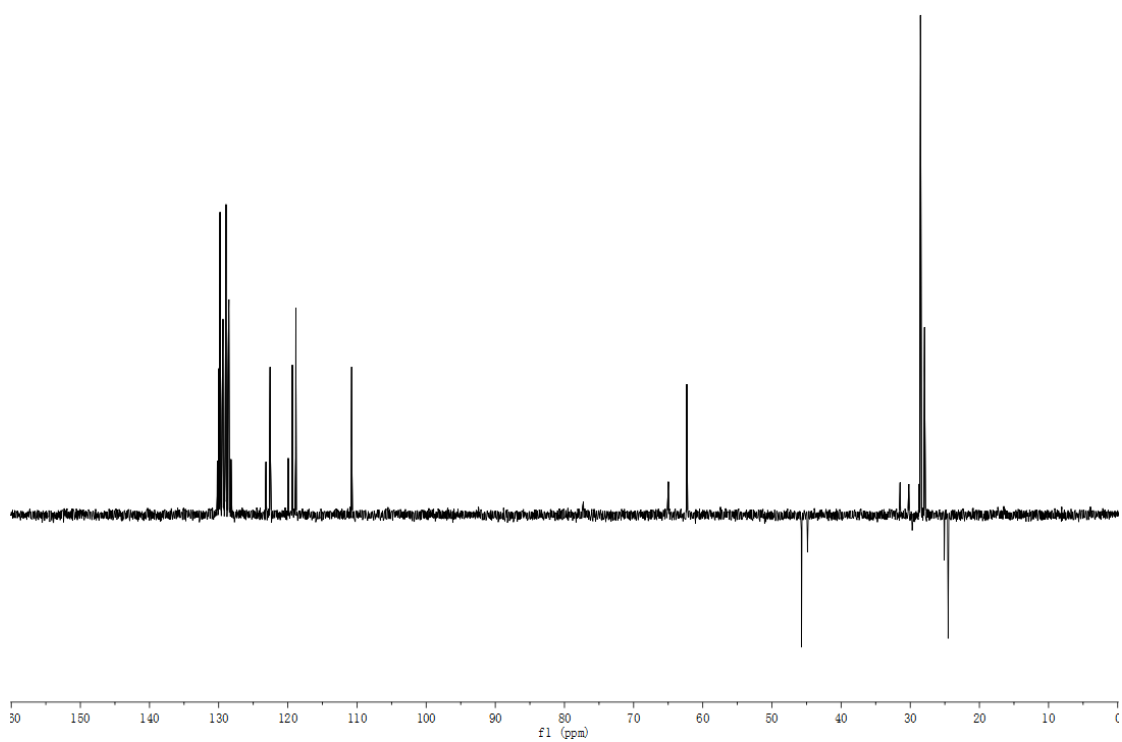

**HMBC of 2A:**

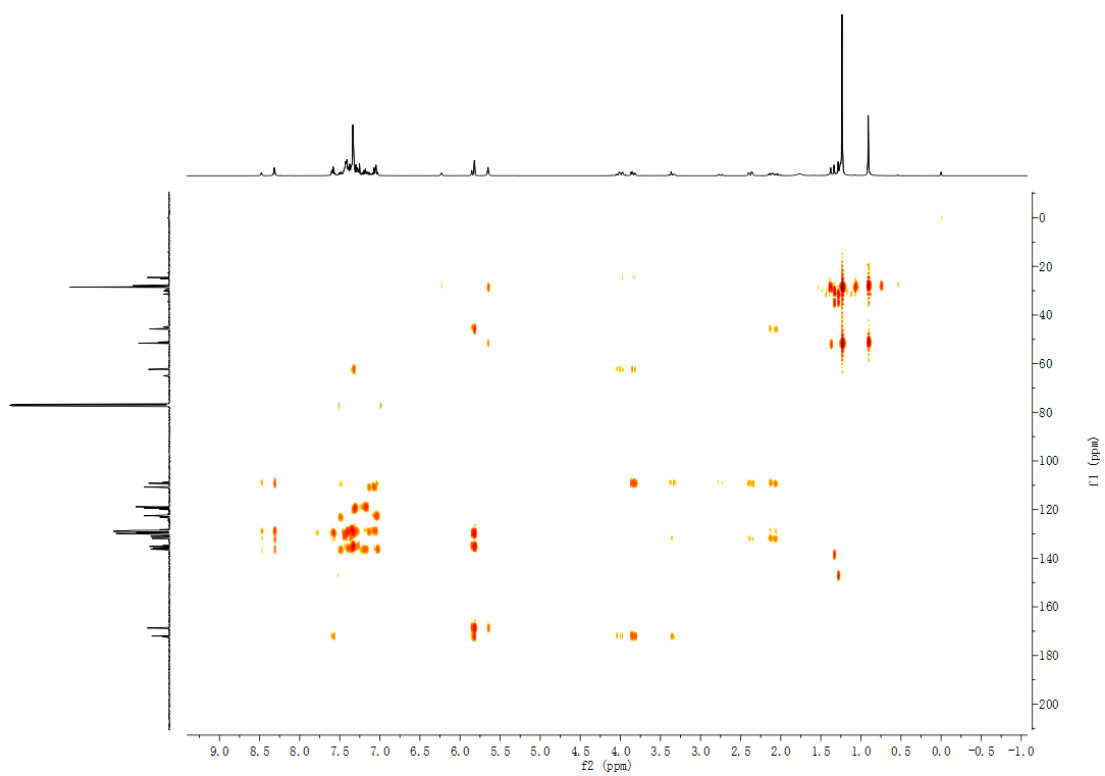

**HSQC of 2A:**

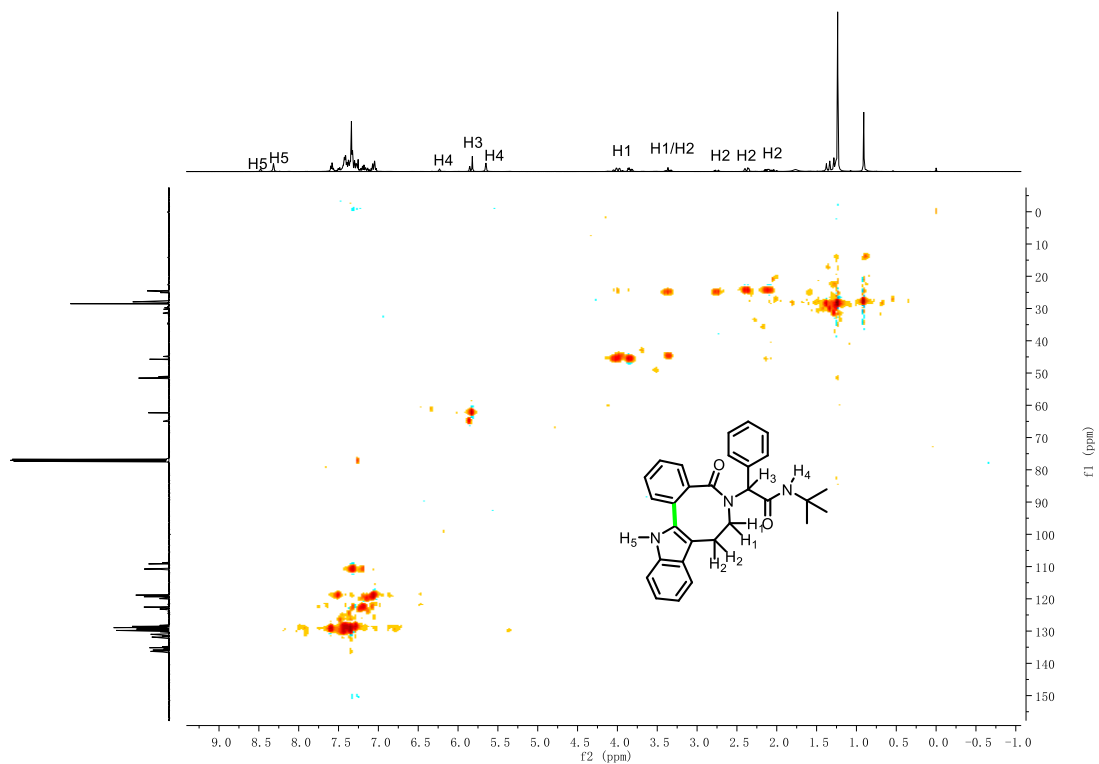

**N-(tert-butyl)-2-(1-oxo-3,4-dihydrospiro[benzo[c]azepine-5,3'-indol]-2(1H)-yl)-2-(p-tolyl)acetamide (3down)**

**<sup>1</sup>H NMR (400 MHz, CDCl<sub>3</sub>):**

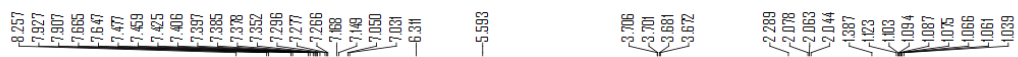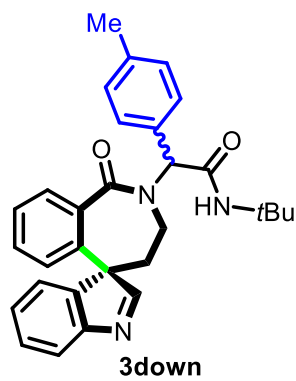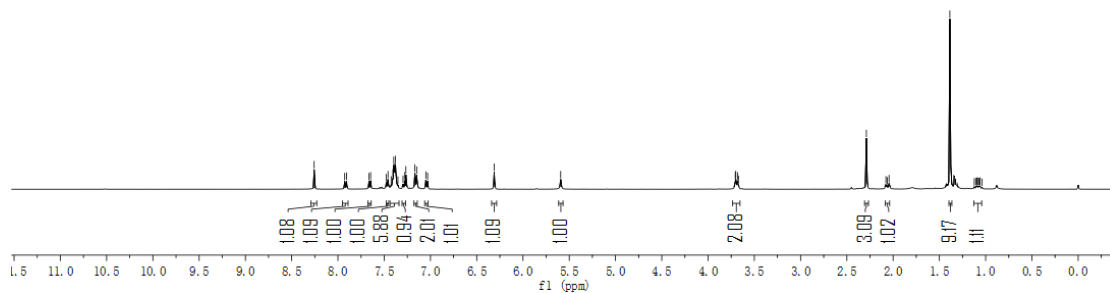

**<sup>13</sup>C NMR (100 MHz, CDCl<sub>3</sub>):**

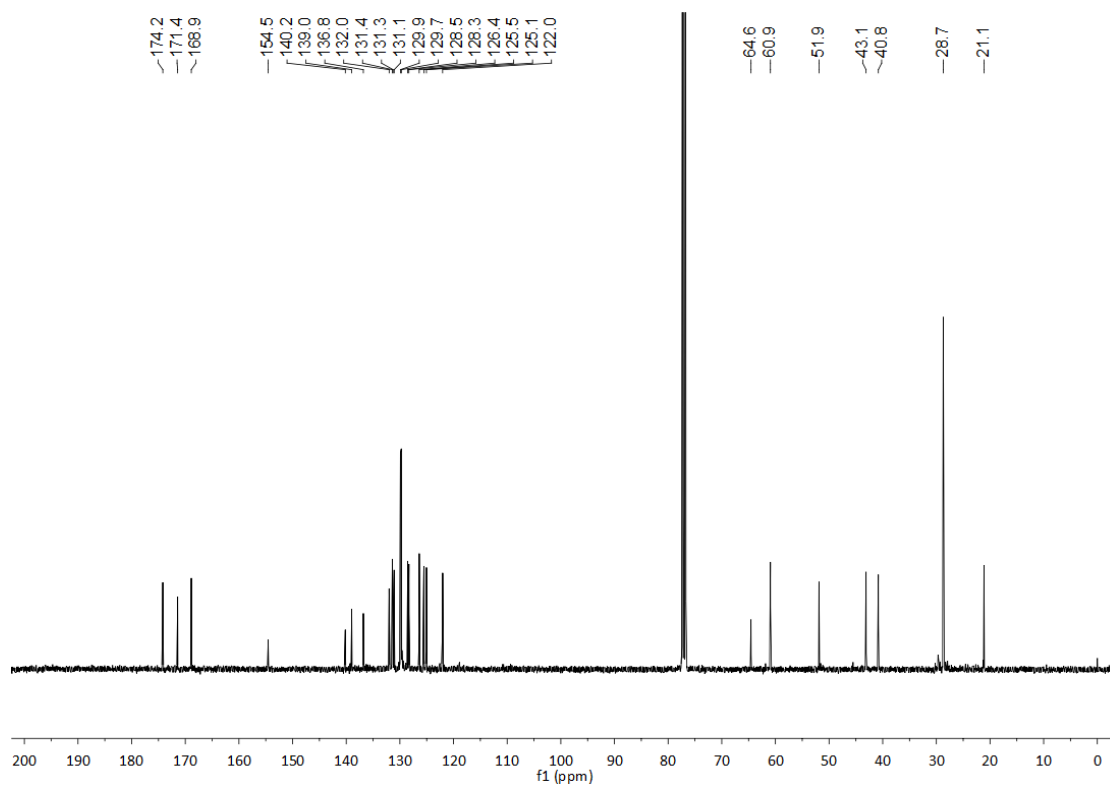

**DEPT**

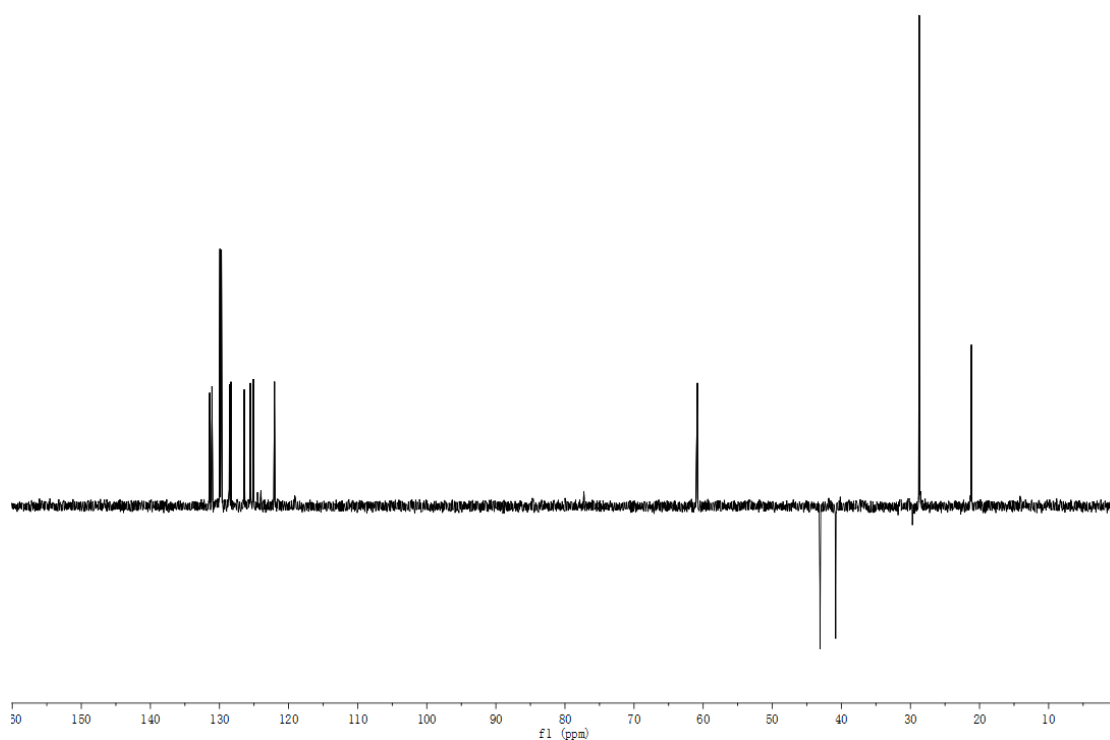

**N-(tert-butyl)-2-(1-oxo-3,4-dihydrospiro[benzo[c]azepine-5,3'-indol]-2(1H)-yl)-2-(p-tolyl)acetamide (3up)**

**<sup>1</sup>H NMR (400 MHz, CDCl<sub>3</sub>):**

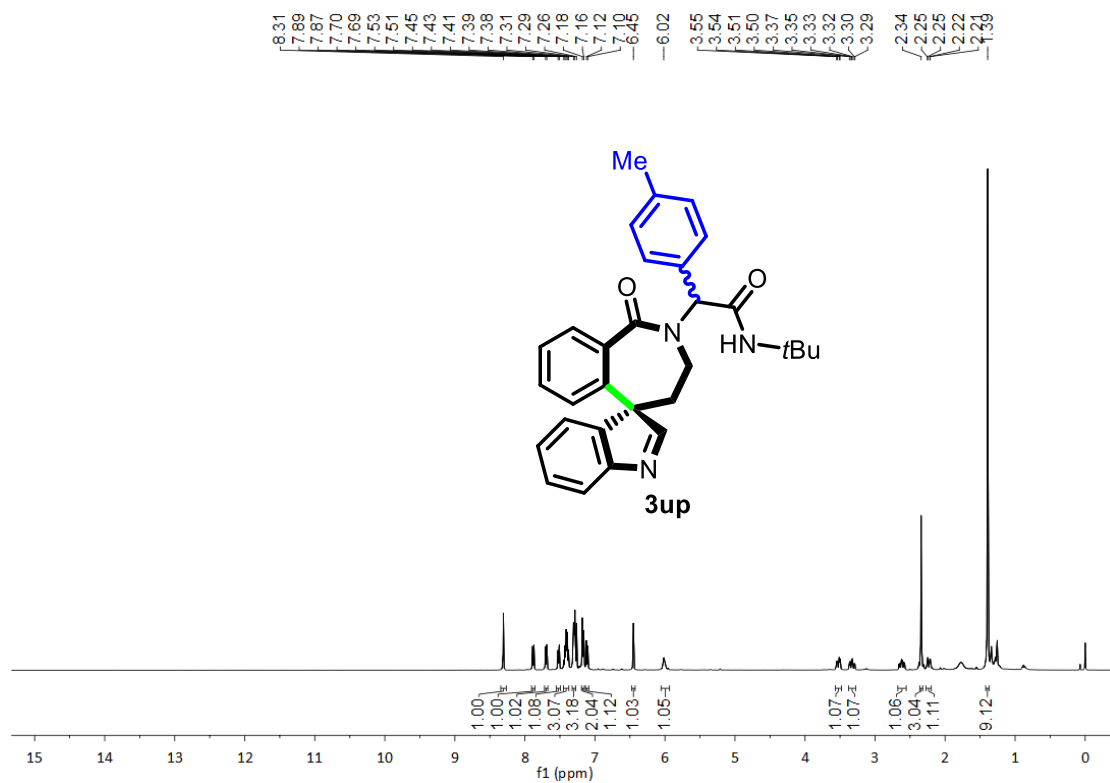

**<sup>13</sup>C NMR (100 MHz, CDCl<sub>3</sub>):**

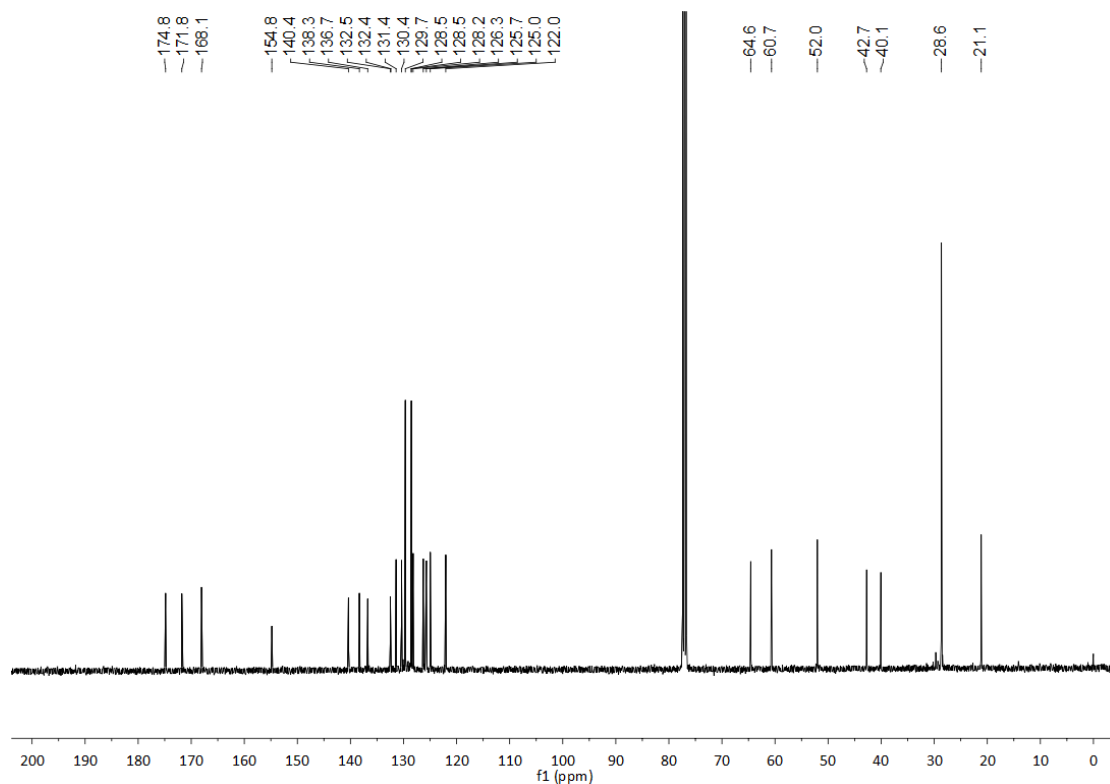

**DEPT**

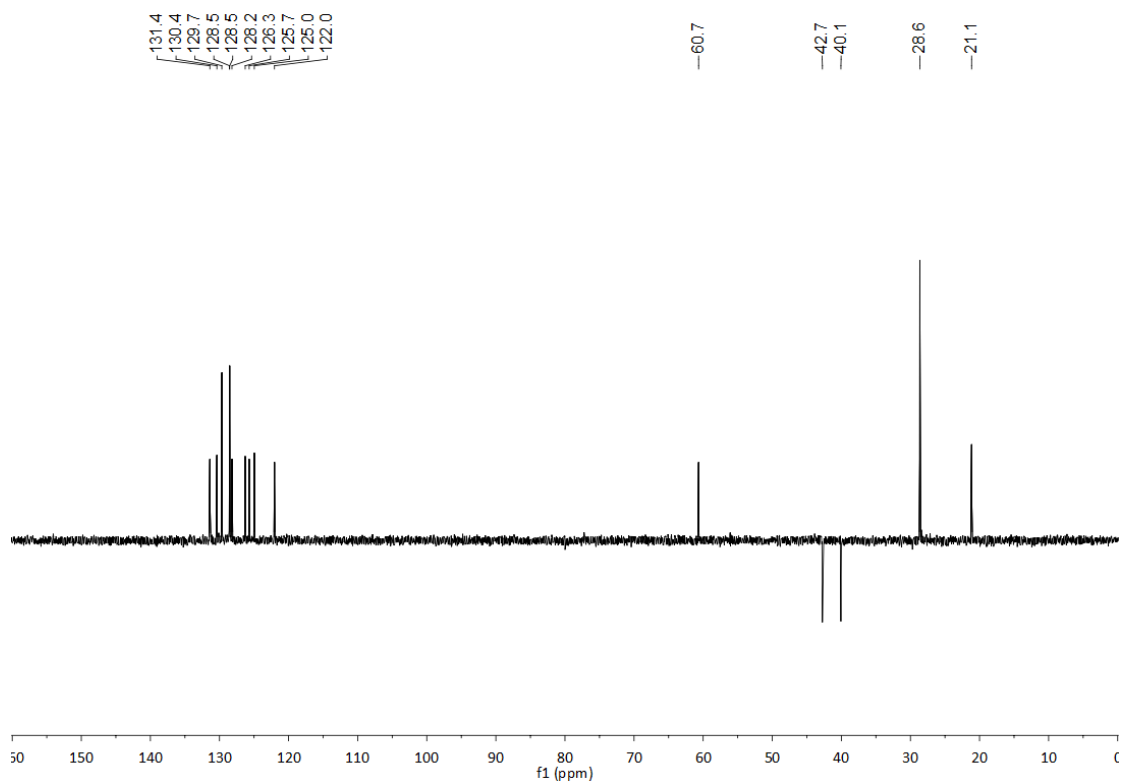

3 crude <sup>1</sup>H NMR

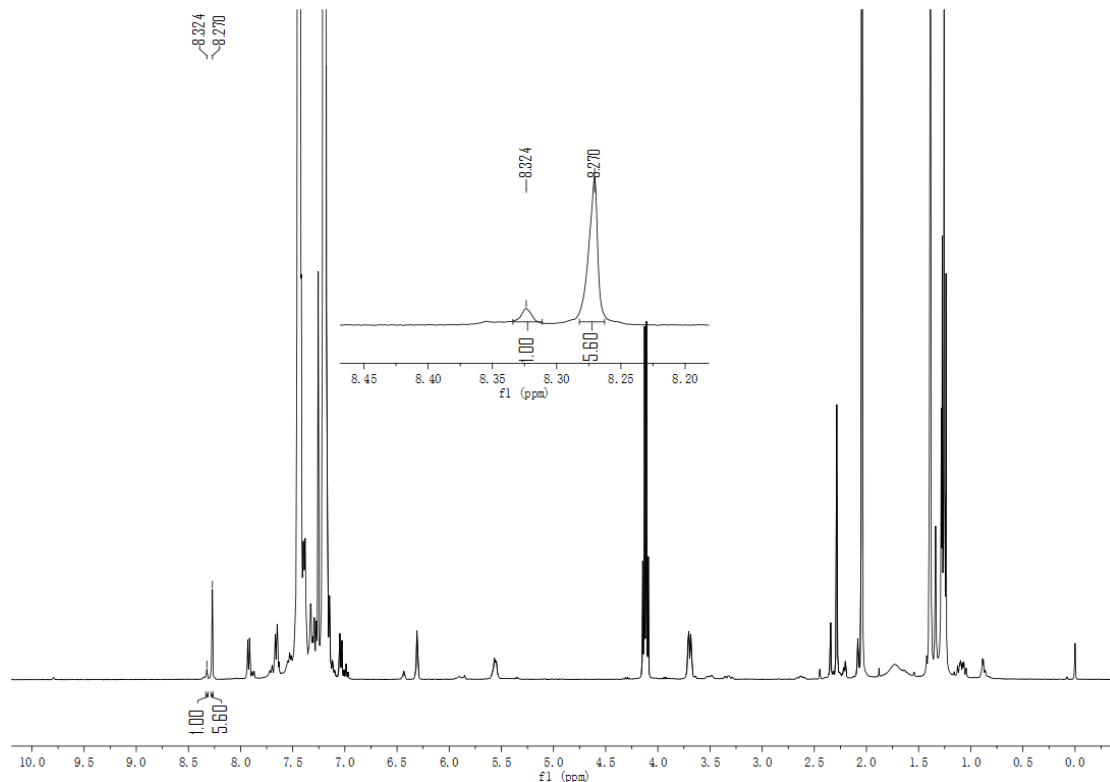

**N-(tert-butyl)-2-(4-methoxyphenyl)-2-(1-oxo-3,4-dihydrospiro[benzo[c]azepine-5,3'-indol]-2(1H)-yl)acetamide (4down)**

**<sup>1</sup>H NMR (400 MHz, CDCl<sub>3</sub>):**

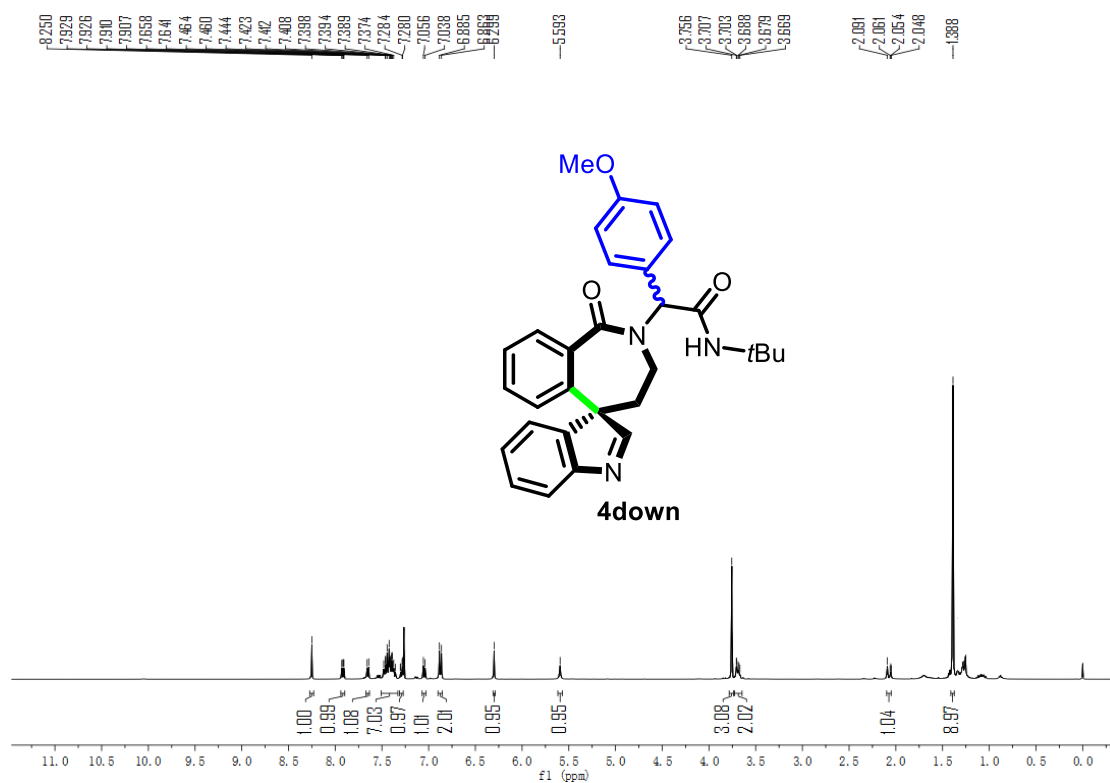

**<sup>13</sup>C NMR (100 MHz, CDCl<sub>3</sub>):**

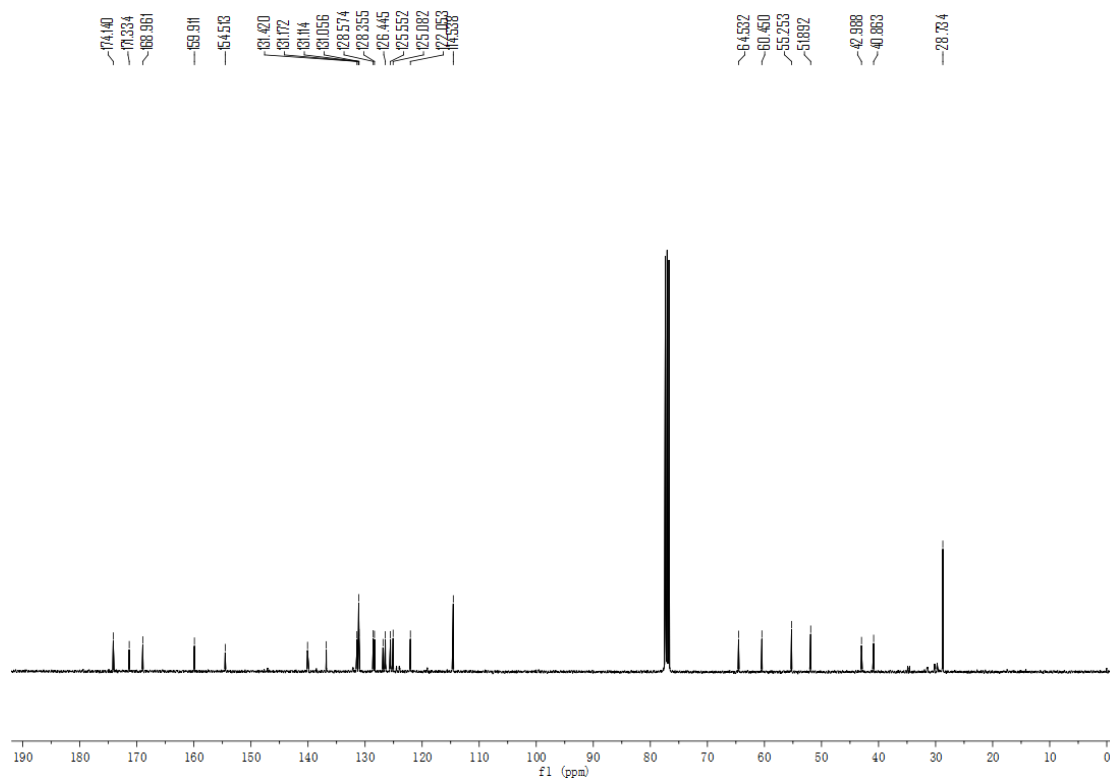

**Dept**

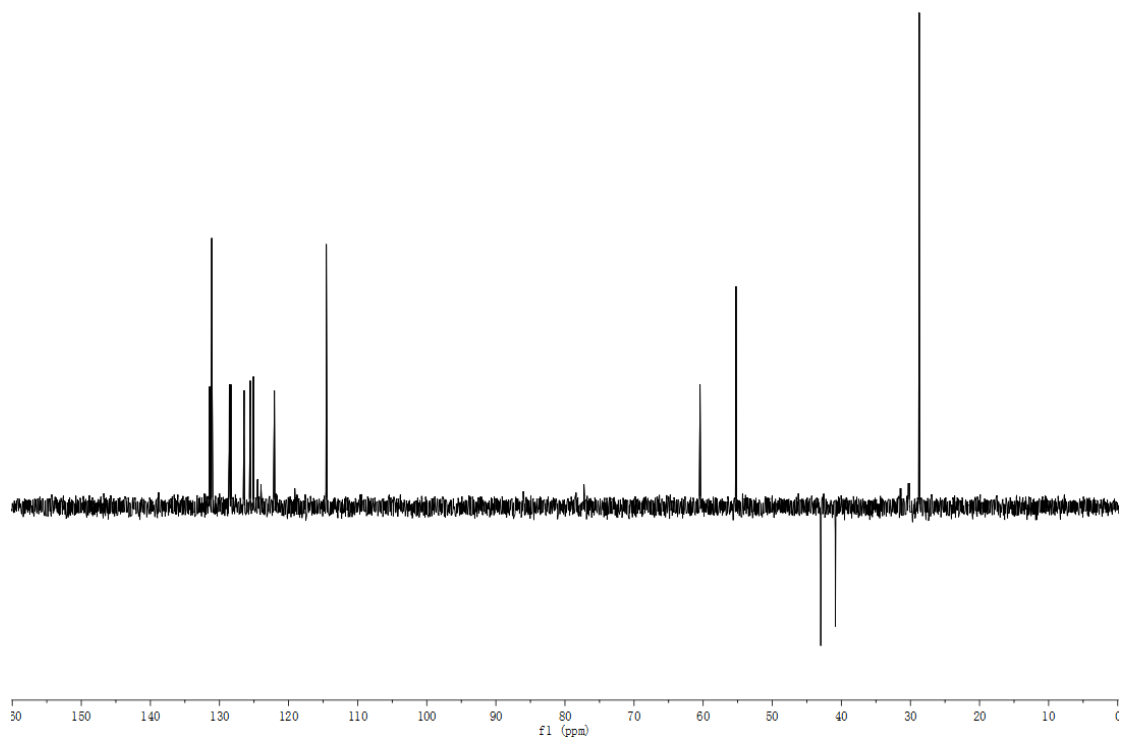

**N-(tert-butyl)-2-(4-methoxyphenyl)-2-(1-oxo-3,4-dihydrospiro[benzo[c]azepine-5,3'-indol]-2(1H)-yl)acetamide (4up)**

**<sup>1</sup>H NMR (400 MHz, CDCl<sub>3</sub>):**

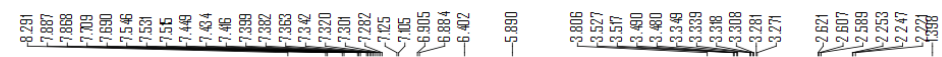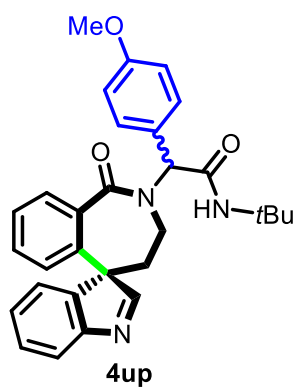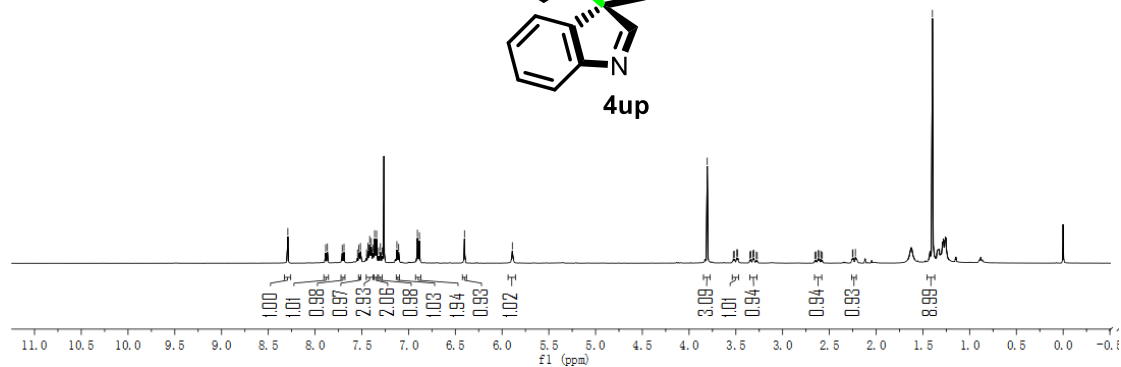

**<sup>13</sup>C NMR (100 MHz, CDCl<sub>3</sub>):**



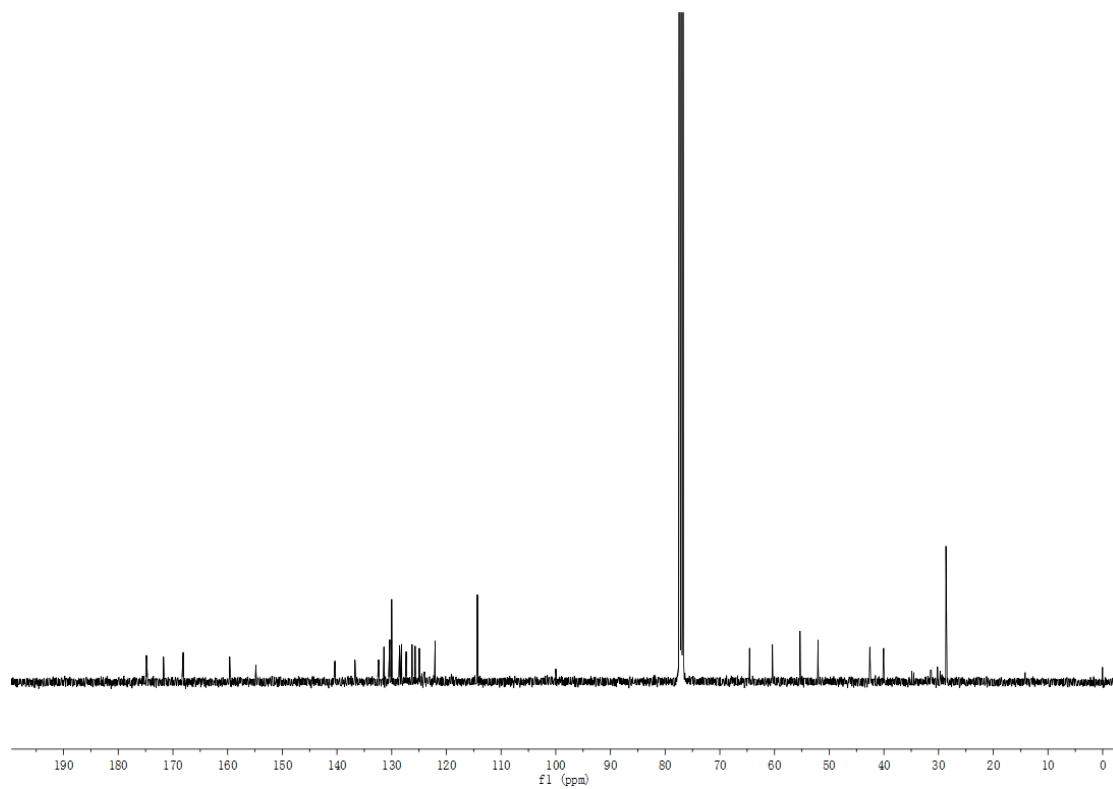

**DEPT**

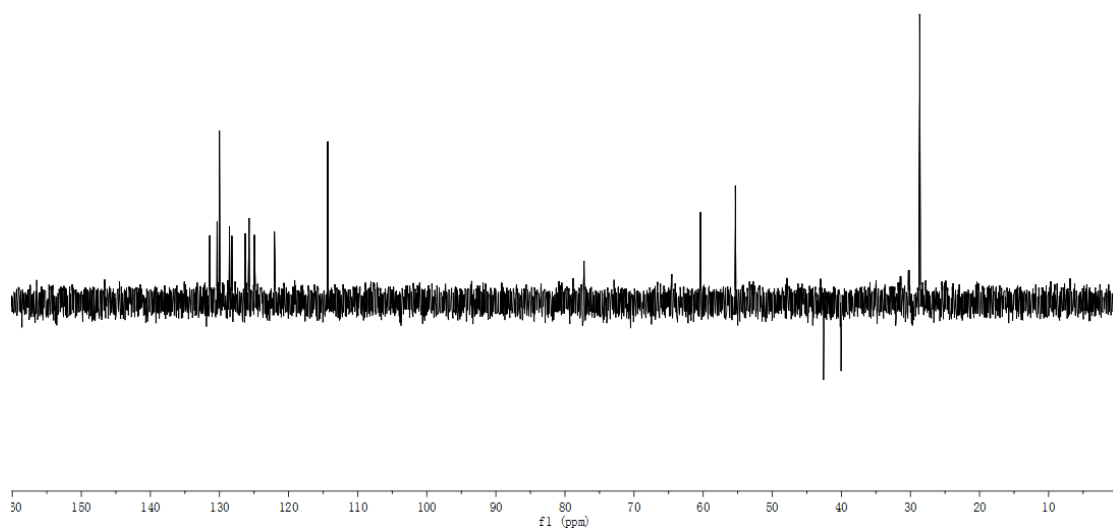

**4 crude <sup>1</sup>H NMR**

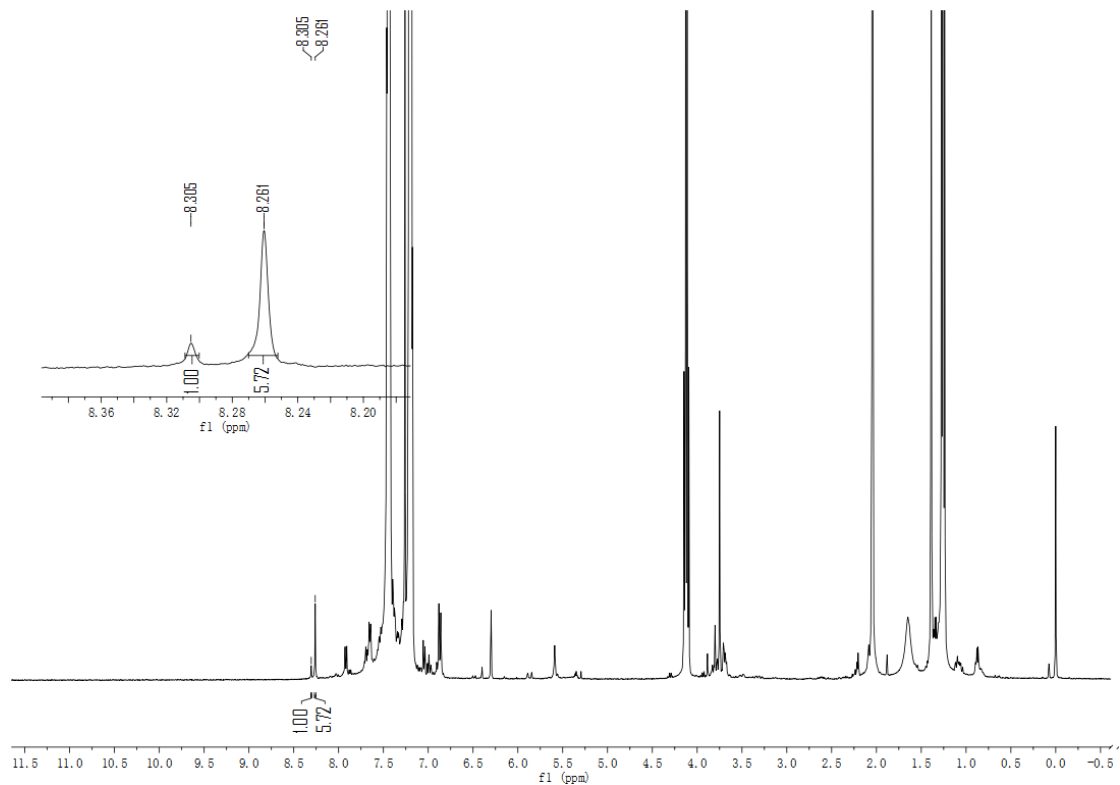

**N-(tert-butyl)-2-(3-methoxyphenyl)-2-(1-oxo-3,4-dihydrospiro[benzo[c]azepine-5,3'-indol]-2(1H)-yl)acetamide (5down)**

**<sup>1</sup>H NMR (400 MHz, CDCl<sub>3</sub>):**

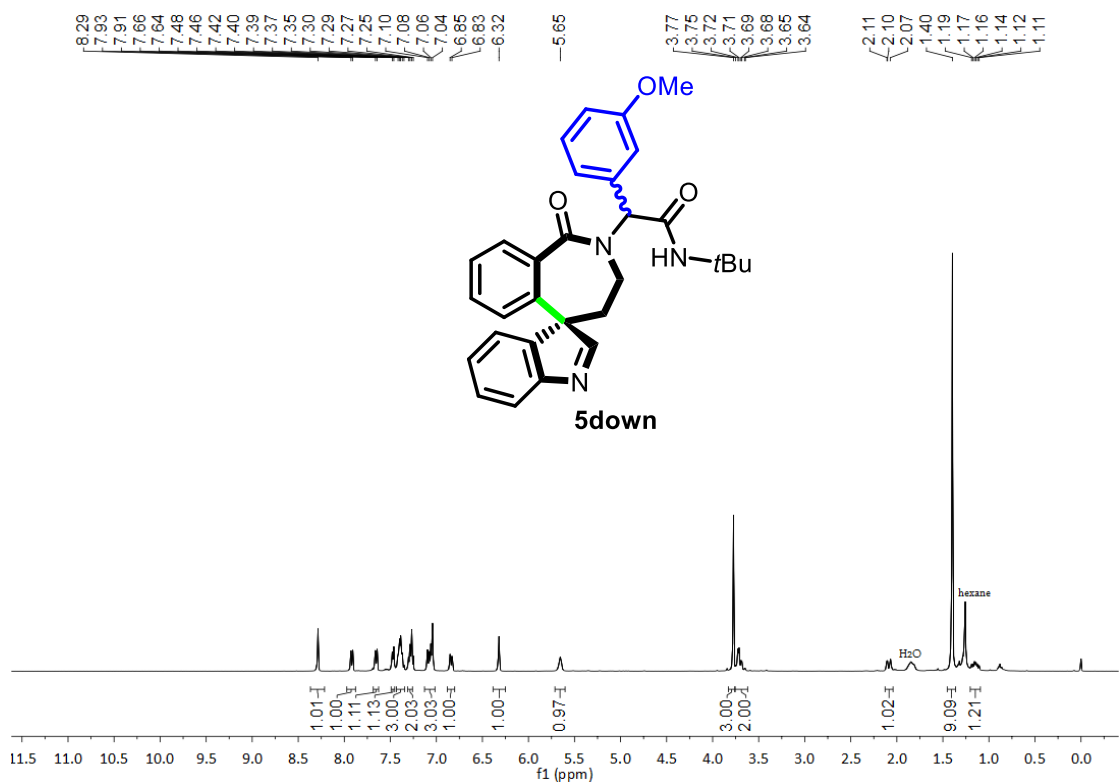

**<sup>13</sup>C NMR (100 MHz, CDCl<sub>3</sub>):**

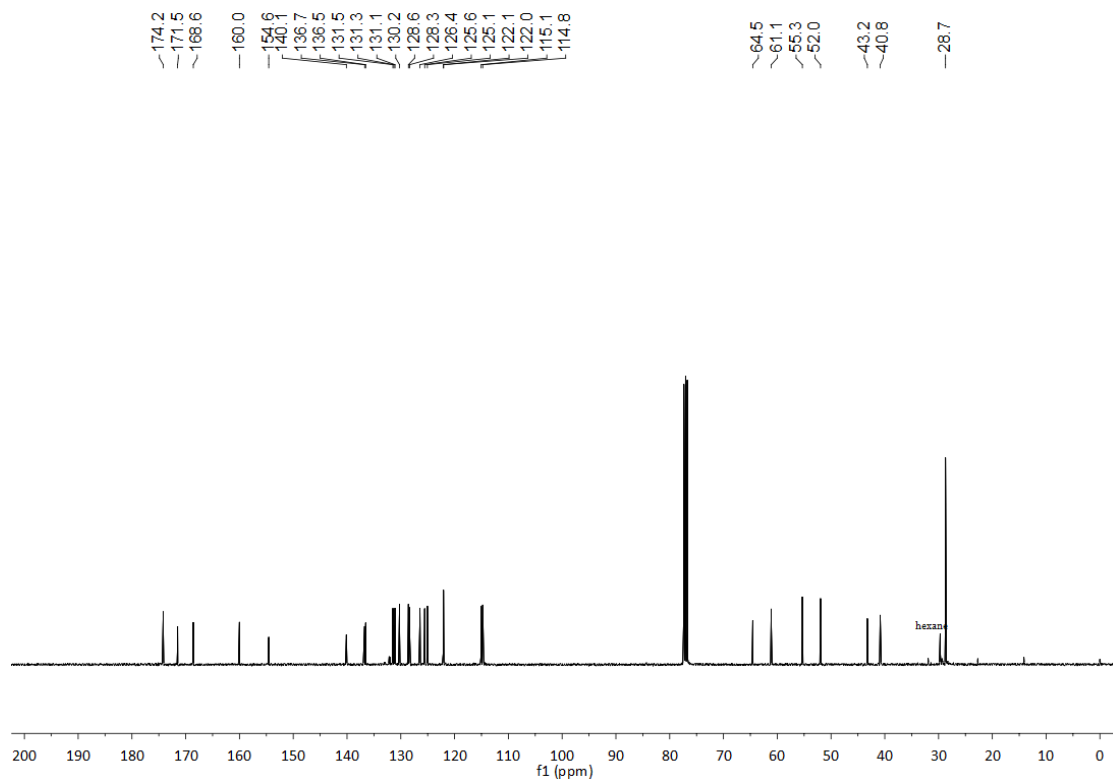

**DEPT**

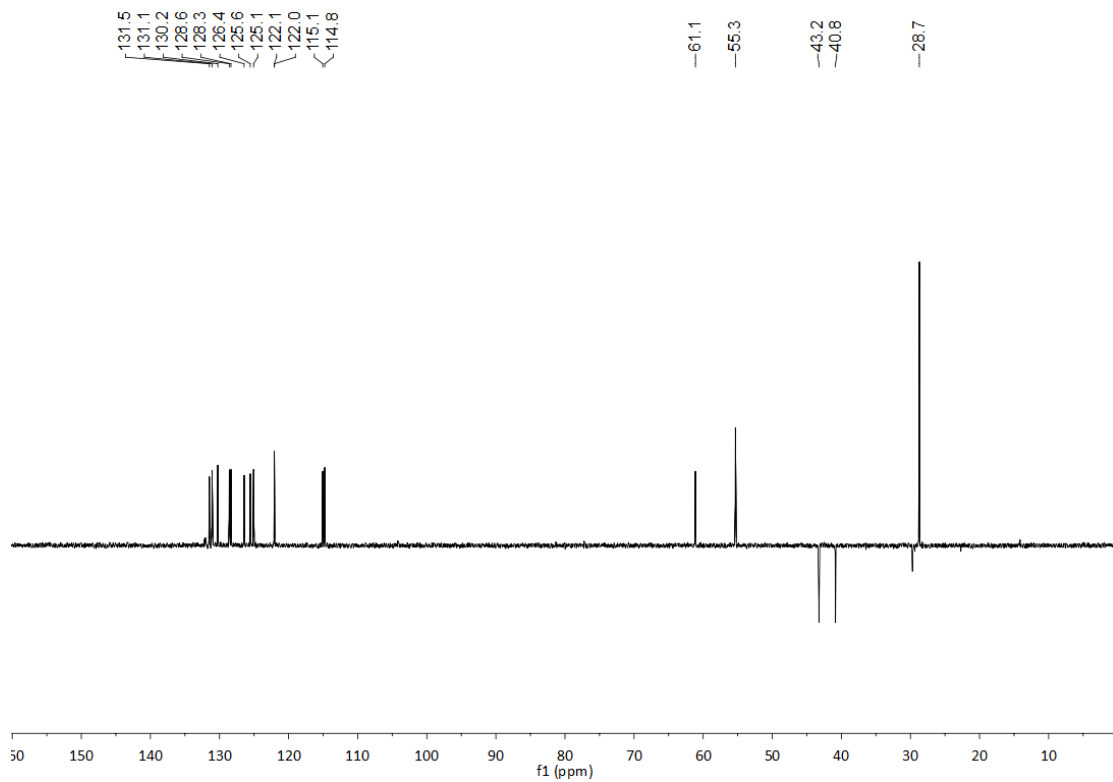

**5** crude <sup>1</sup>H NMR

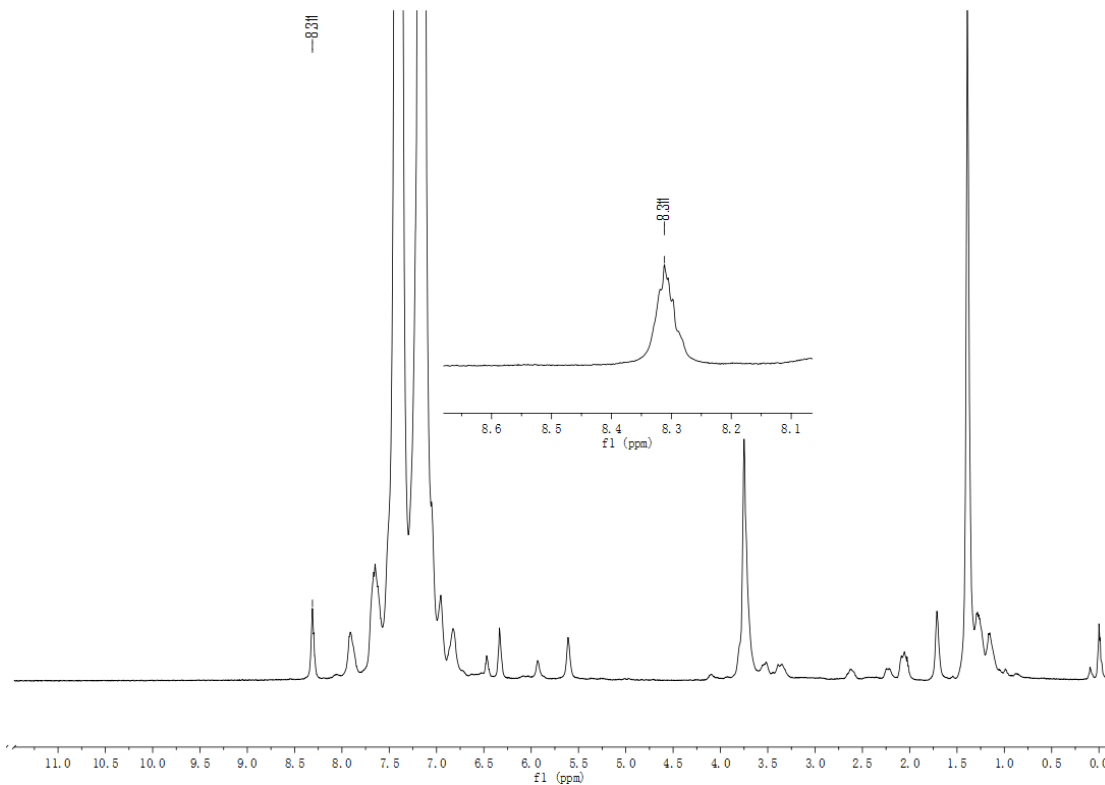

**N-(tert-butyl)-2-(1-oxo-3,4-dihydrospiro[benzo[c]azepine-5,3'-indol]-2(1H)-yl)-2-(m-tolyl)acetamide (6down)**

**<sup>1</sup>H NMR (400 MHz, CDCl<sub>3</sub>):**

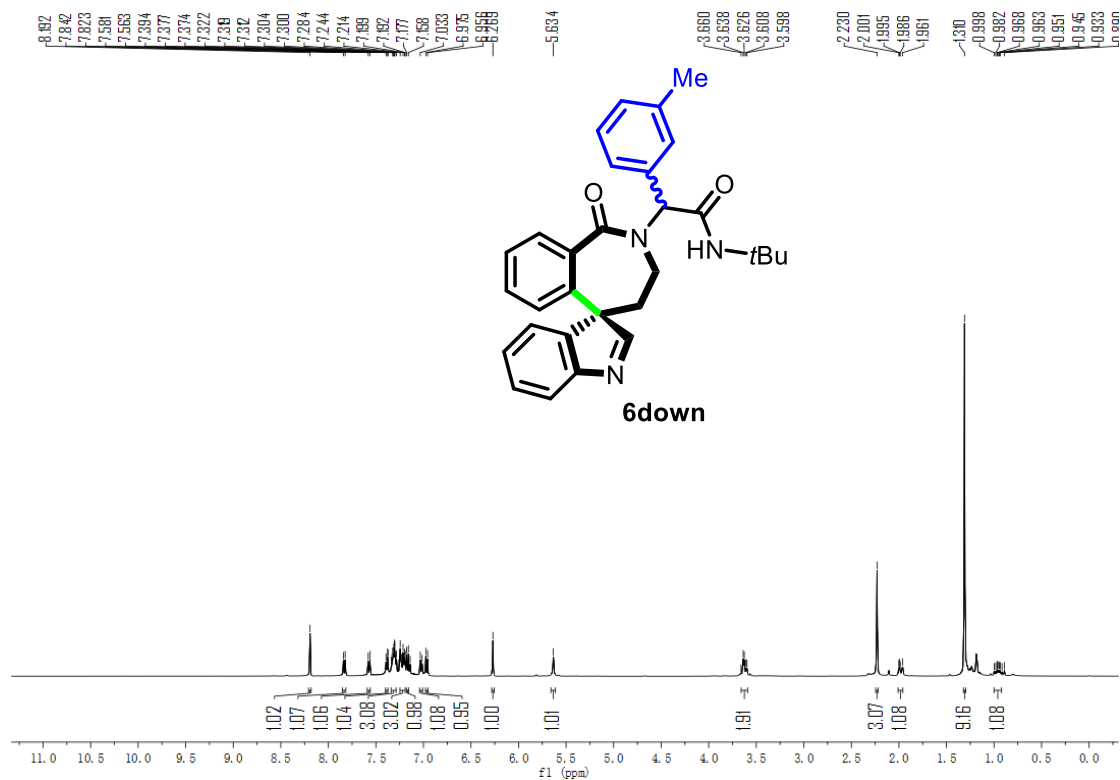

**<sup>13</sup>C NMR (100 MHz, CDCl<sub>3</sub>):**

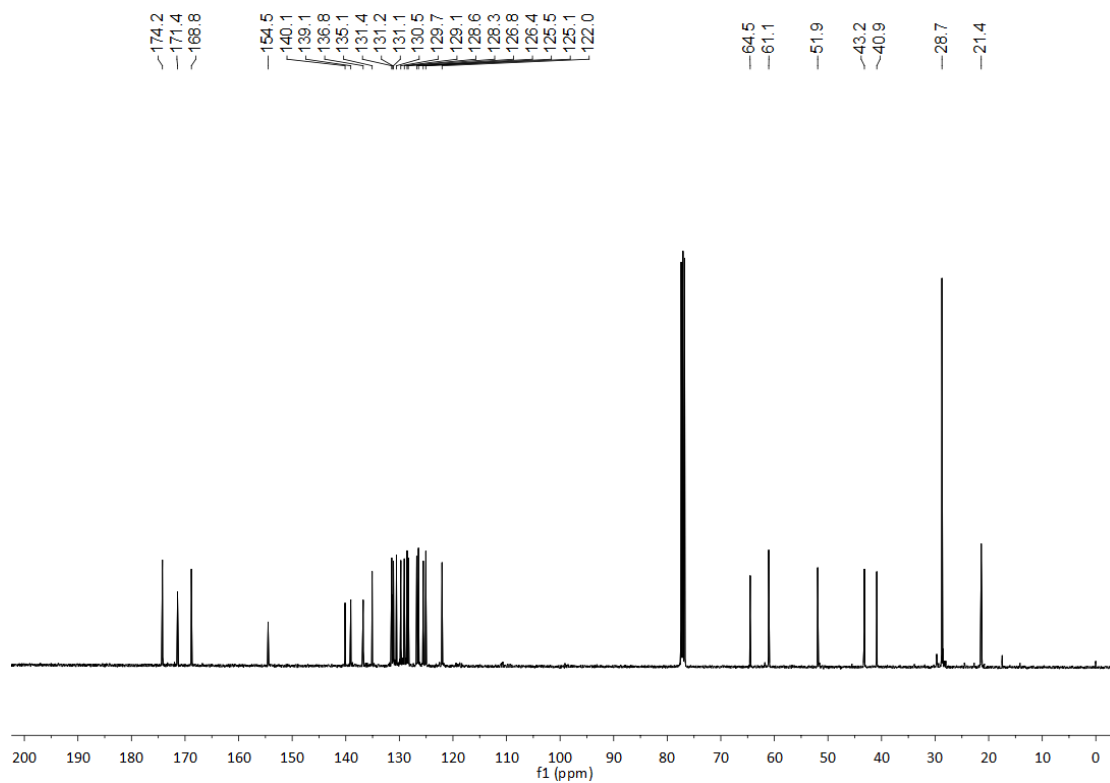

Dept

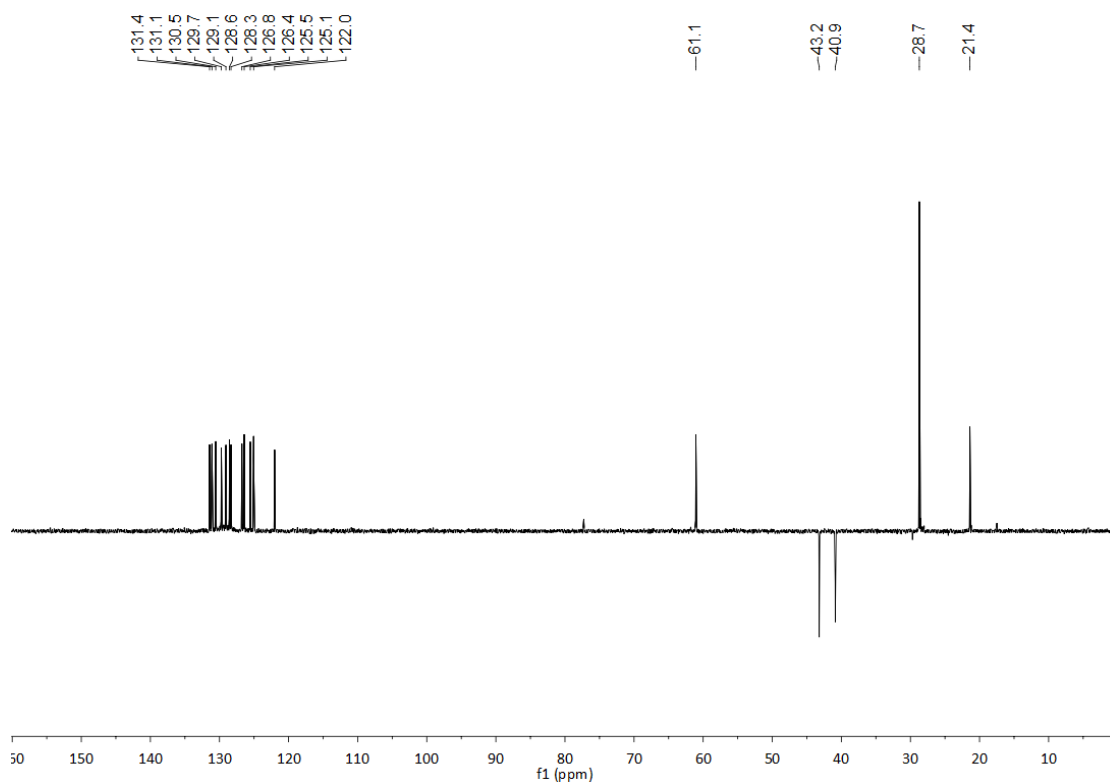

**N-(tert-butyl)-2-(1-oxo-3,4-dihydrospiro[benzo[c]azepine-5,3'-indol]-2(1H)-yl)-2-(m-tolyl)acetamide (6up)**

**<sup>1</sup>H NMR (400 MHz, CDCl<sub>3</sub>):**

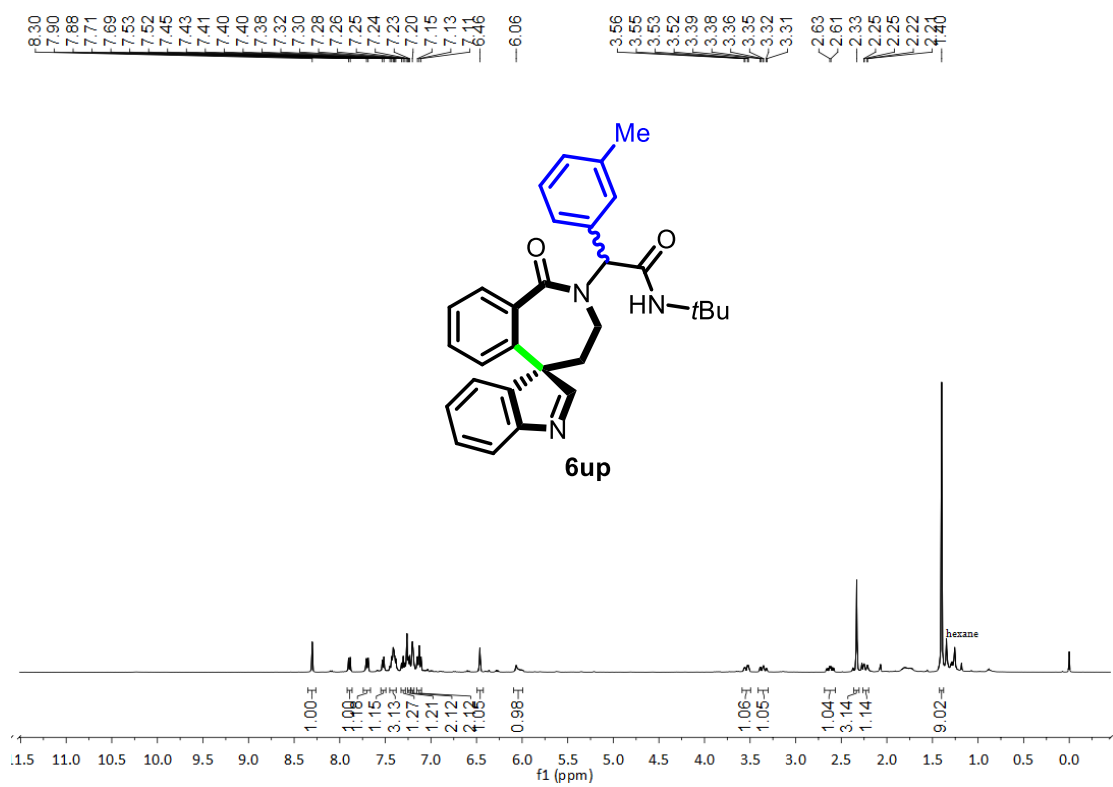

**<sup>13</sup>C NMR (100 MHz, CDCl<sub>3</sub>):**

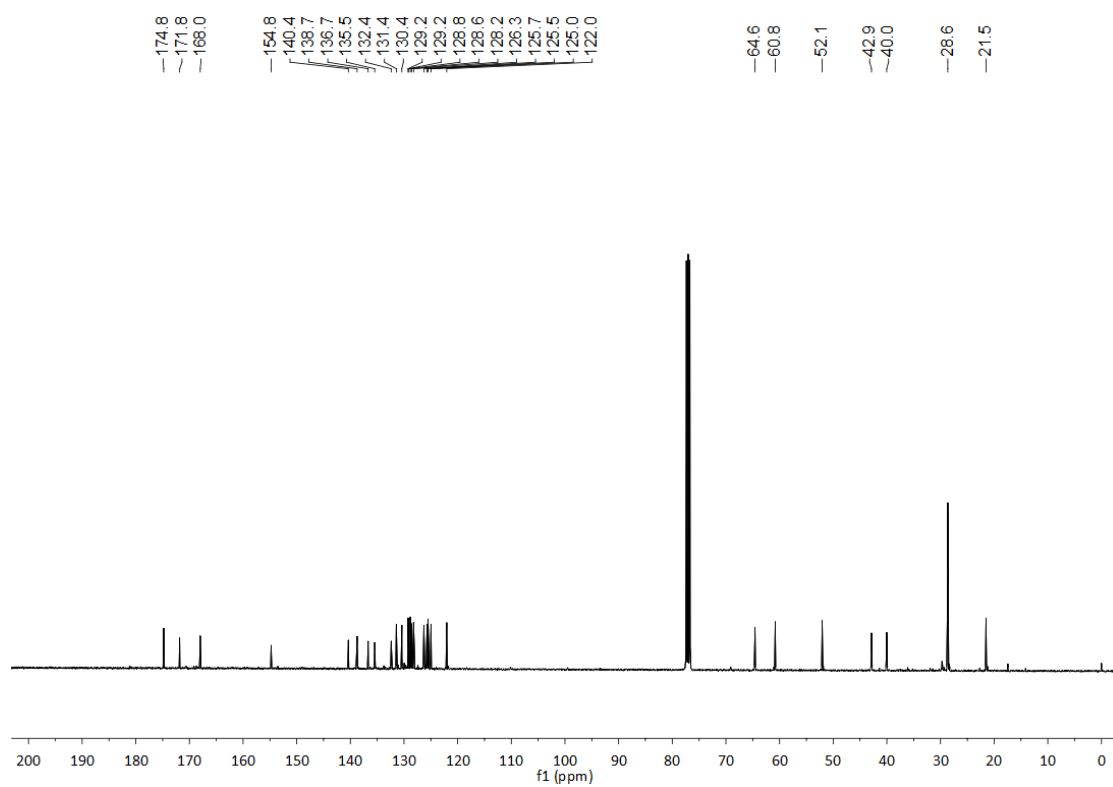

**DEPT**

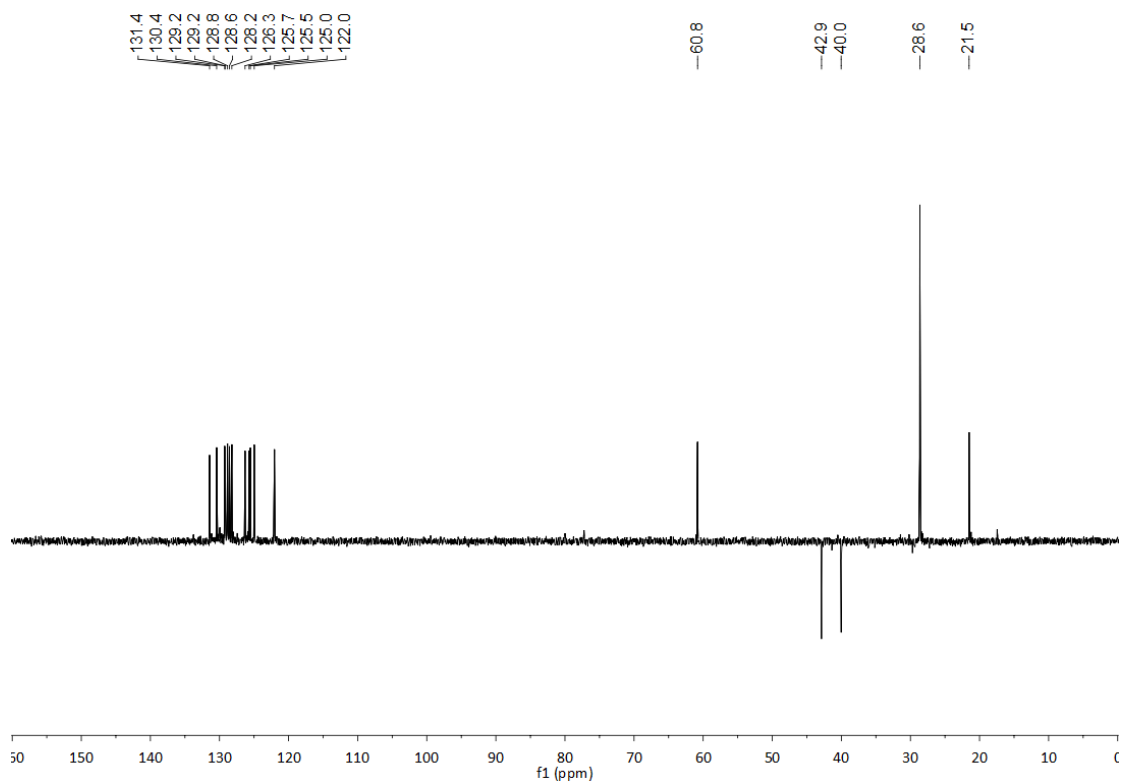

6 crude  $^1\text{H}$  NMR

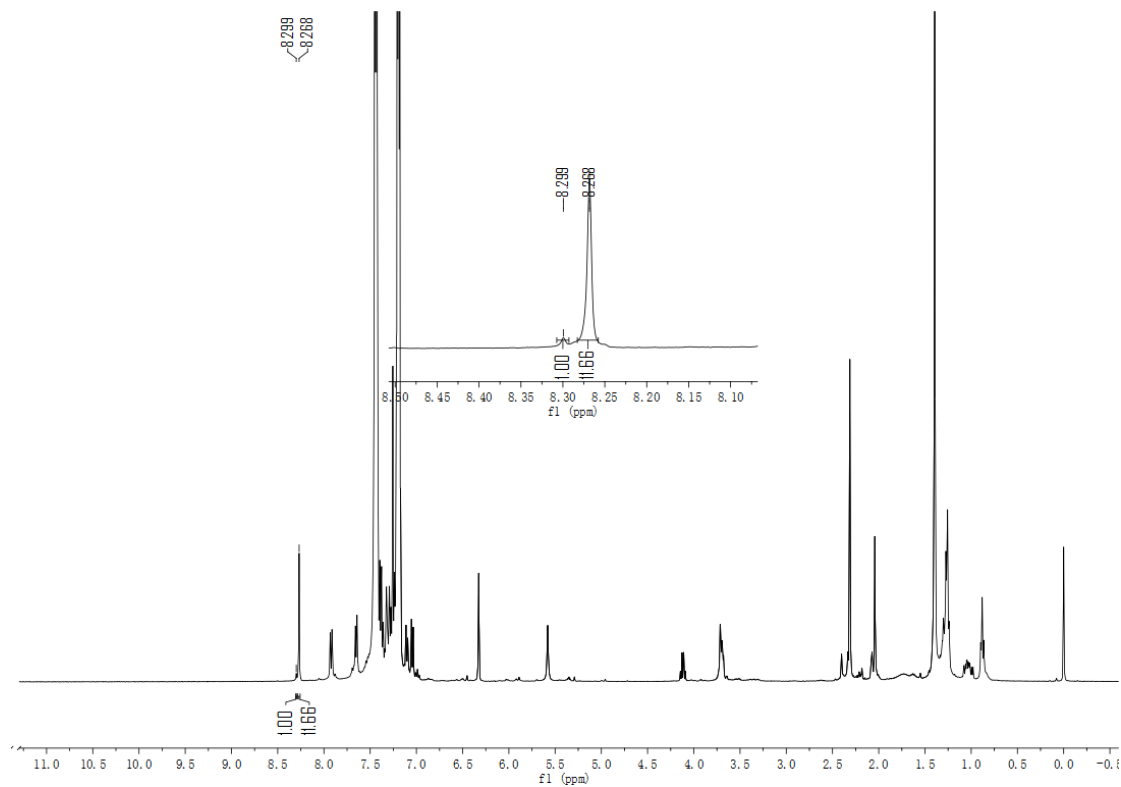

**N-(tert-butyl)-2-(1-oxo-3,4-dihydrospiro[benzo[c]azepine-5,3'-indol]-2(1H)-yl)-2-(3,4,5-trimethoxyphenyl)acetamide (7down)**

$^1\text{H}$  NMR (400 MHz,  $\text{CDCl}_3$ ):

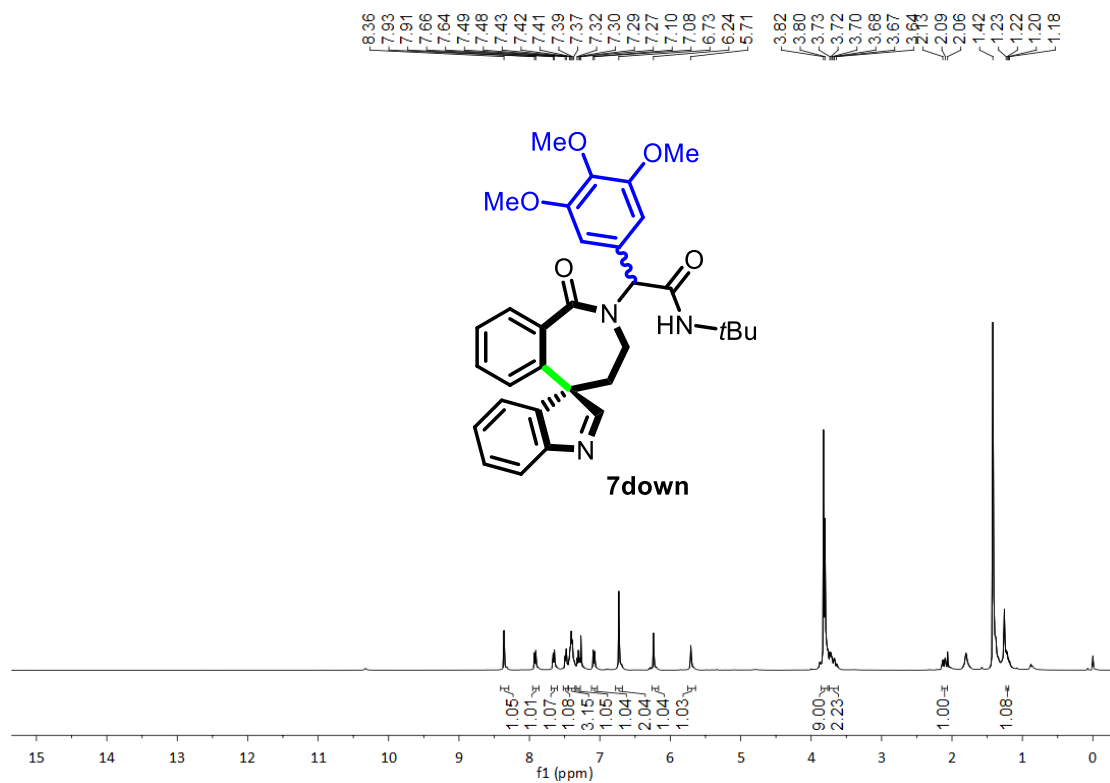

**<sup>13</sup>C NMR (100 MHz, CDCl<sub>3</sub>):**

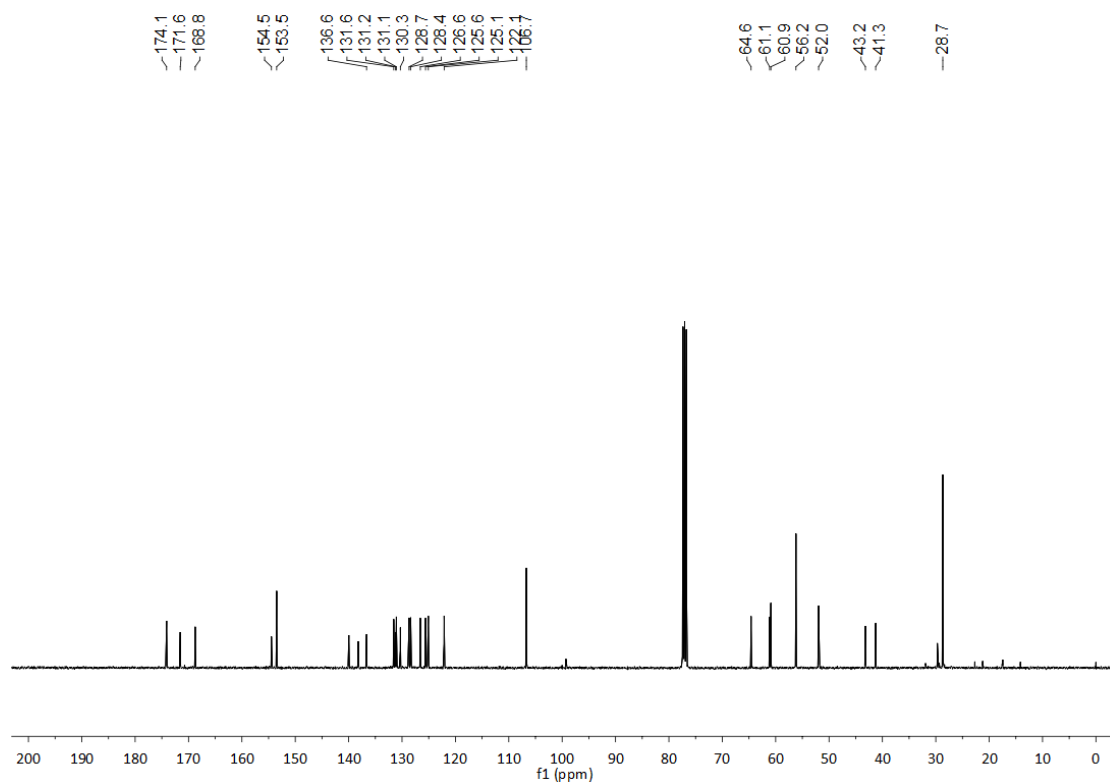

**DEPT**



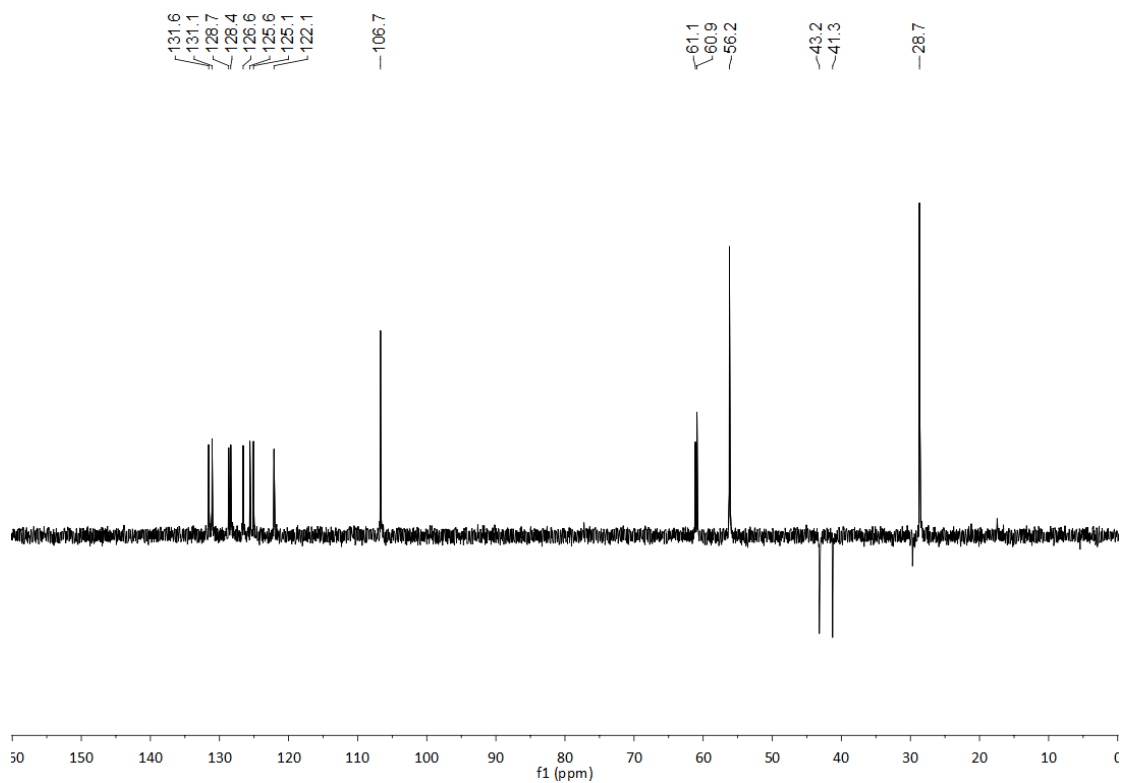

**N-(tert-butyl)-2-(1-oxo-3,4-dihydrospiro[benzo[c]azepine-5,3'-indol]-2(1H)-yl)-2-(3,4,5-trimethoxyphenyl)acetamide (7up)**

**<sup>1</sup>H NMR (400 MHz, CDCl<sub>3</sub>):**

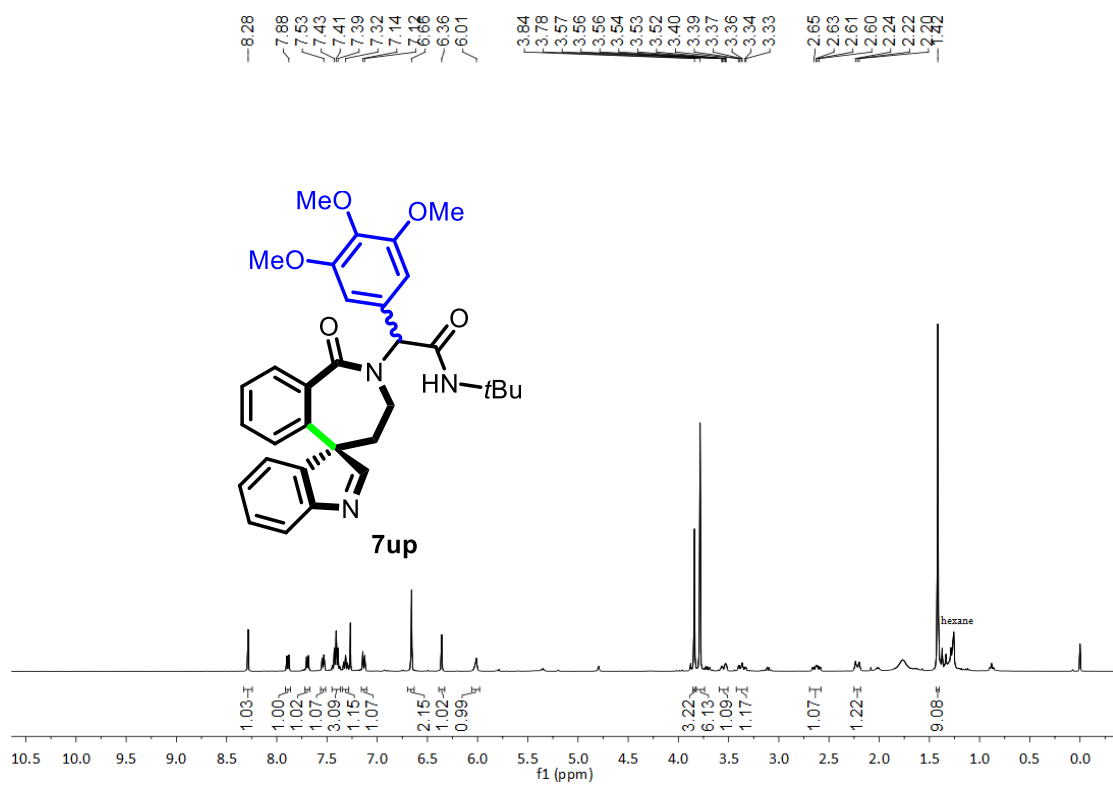

**<sup>13</sup>C NMR (100 MHz, CDCl<sub>3</sub>):**

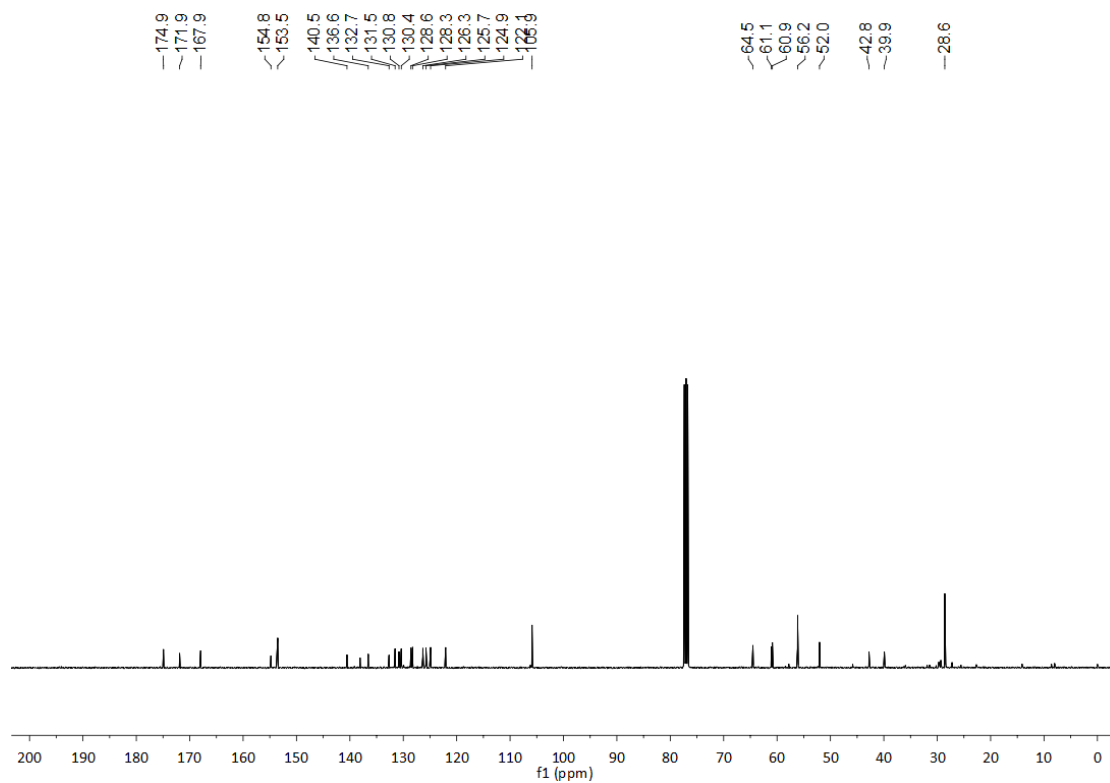

**DEPT**

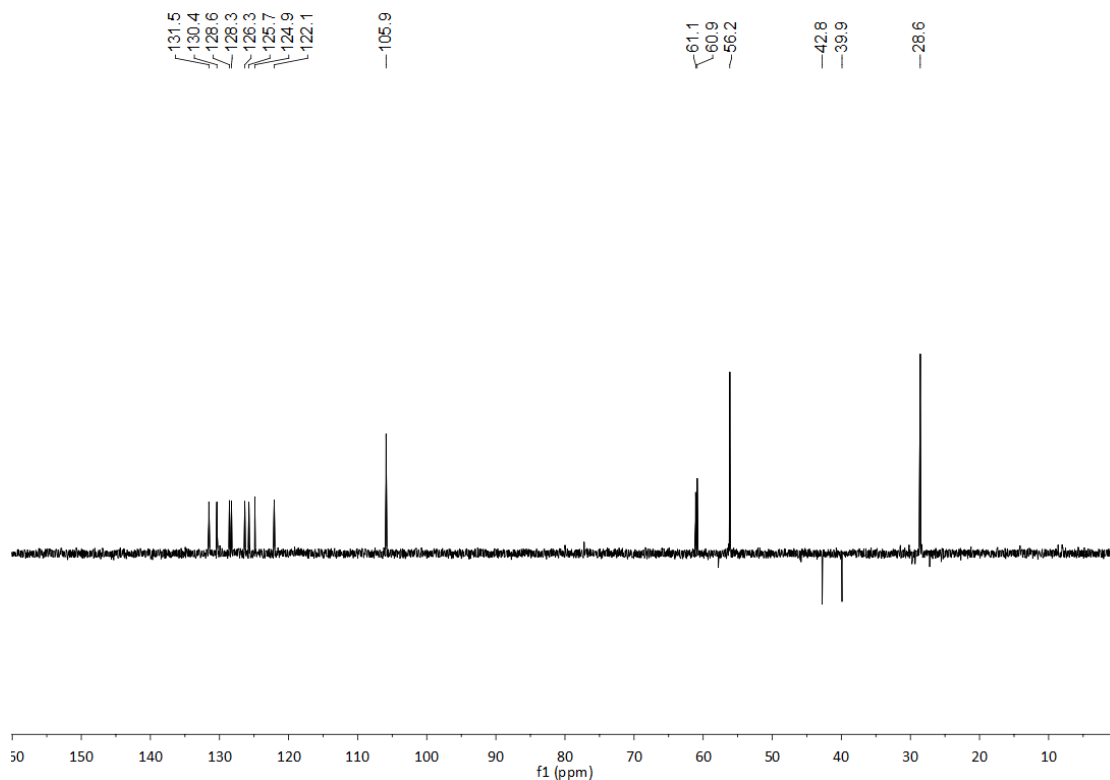

7 crude <sup>1</sup>H NMR

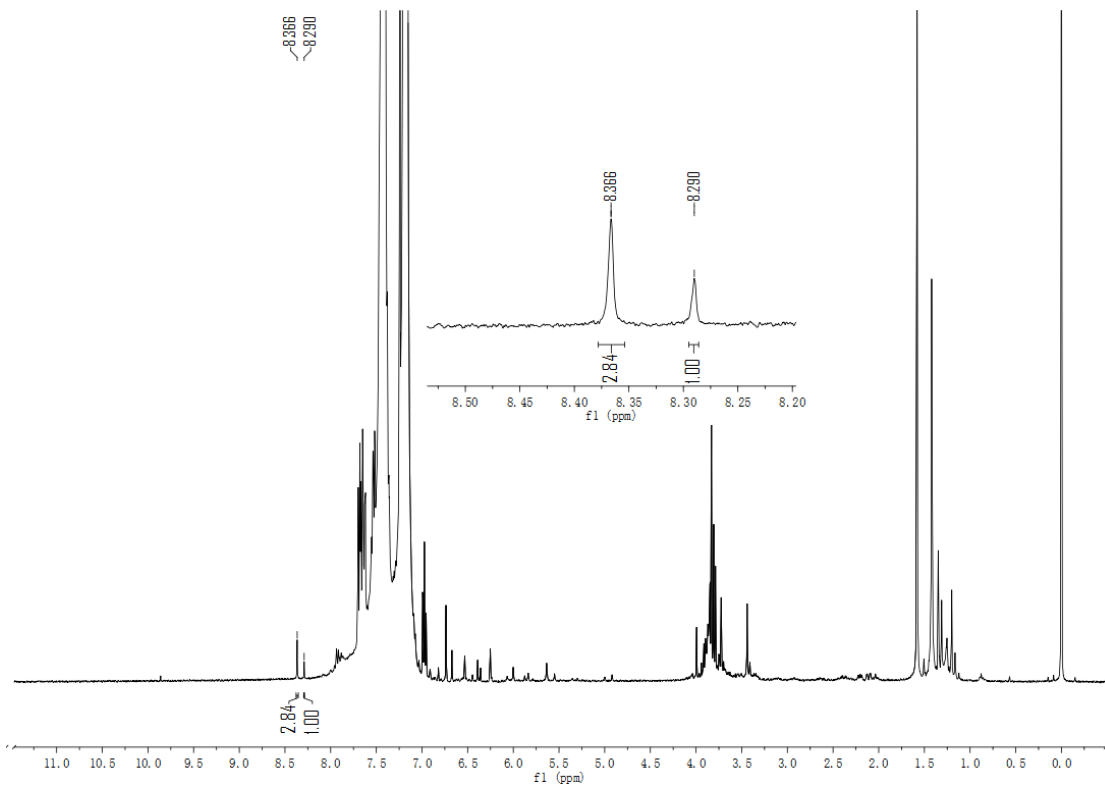

**N-(tert-butyl)-2-(4-fluorophenyl)-2-(1-oxo-3,4-dihydrospiro[benzo[c]azepine-5,3'-indol]-2(1H)-yl)acetamide (8down)**

**<sup>1</sup>H NMR (400 MHz, CDCl<sub>3</sub>):**

8.23, 7.92, 7.90, 7.66, 7.65, 7.54, 7.53, 7.52, 7.51, 7.48, 7.46, 7.42, 7.41, 7.40, 7.40, 7.38, 7.36, 7.32, 7.30, 7.28, 7.27, 7.08, 7.06, 7.04, 6.32, 5.75, 5.74, 3.71, 3.70, 3.69, 2.12, 2.08, 1.39, 1.13, 1.10, 1.09, 1.08, 1.07, 1.05

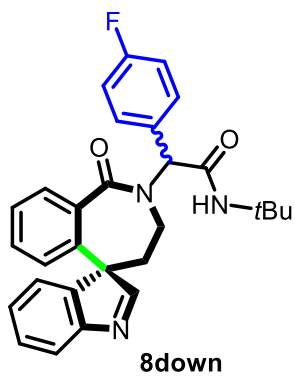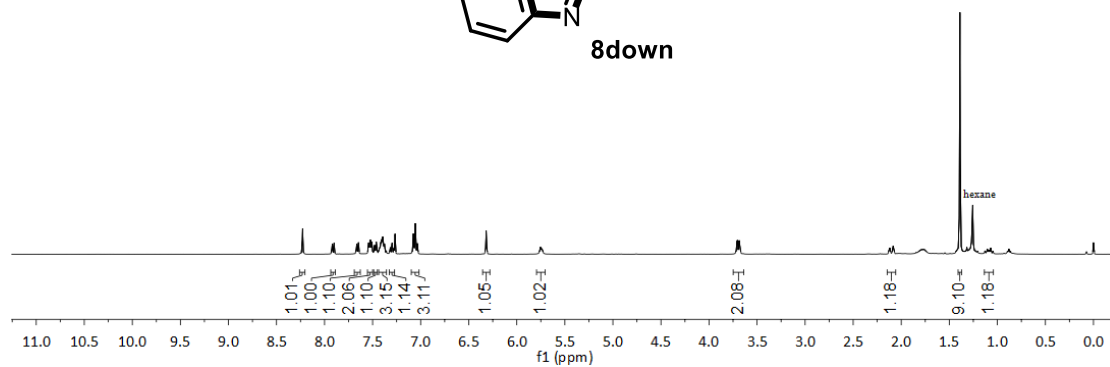

**<sup>13</sup>C NMR (100 MHz, CDCl<sub>3</sub>):**

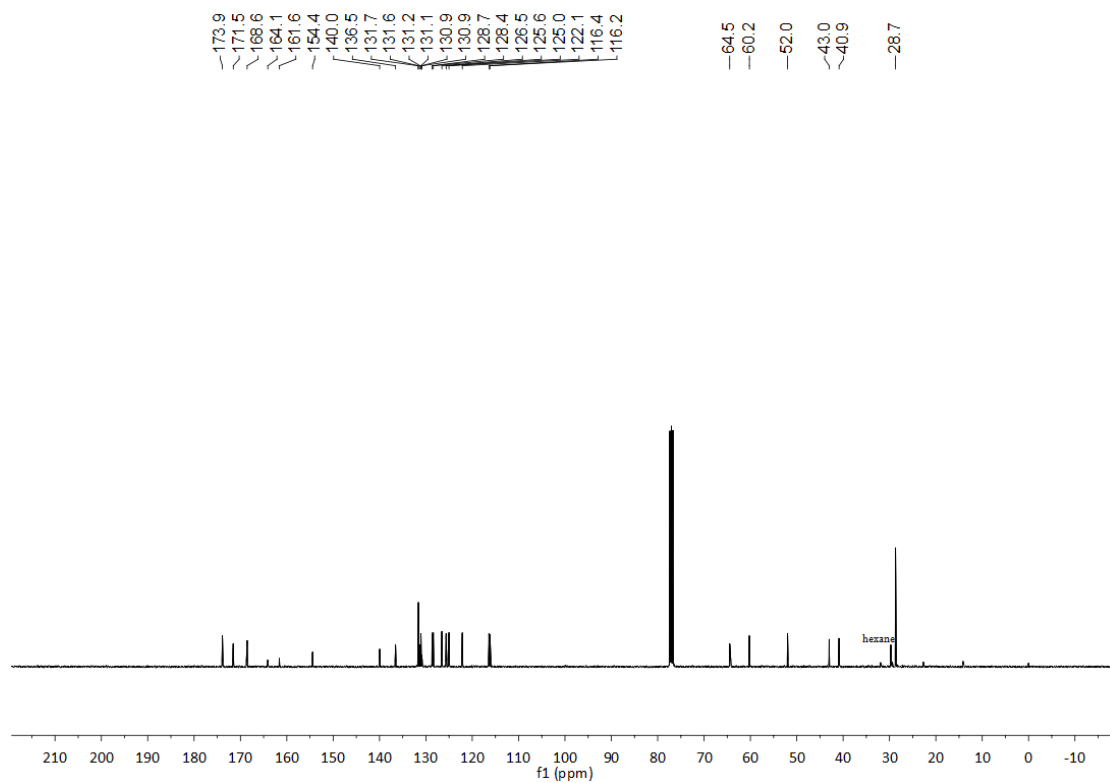

**DEPT**

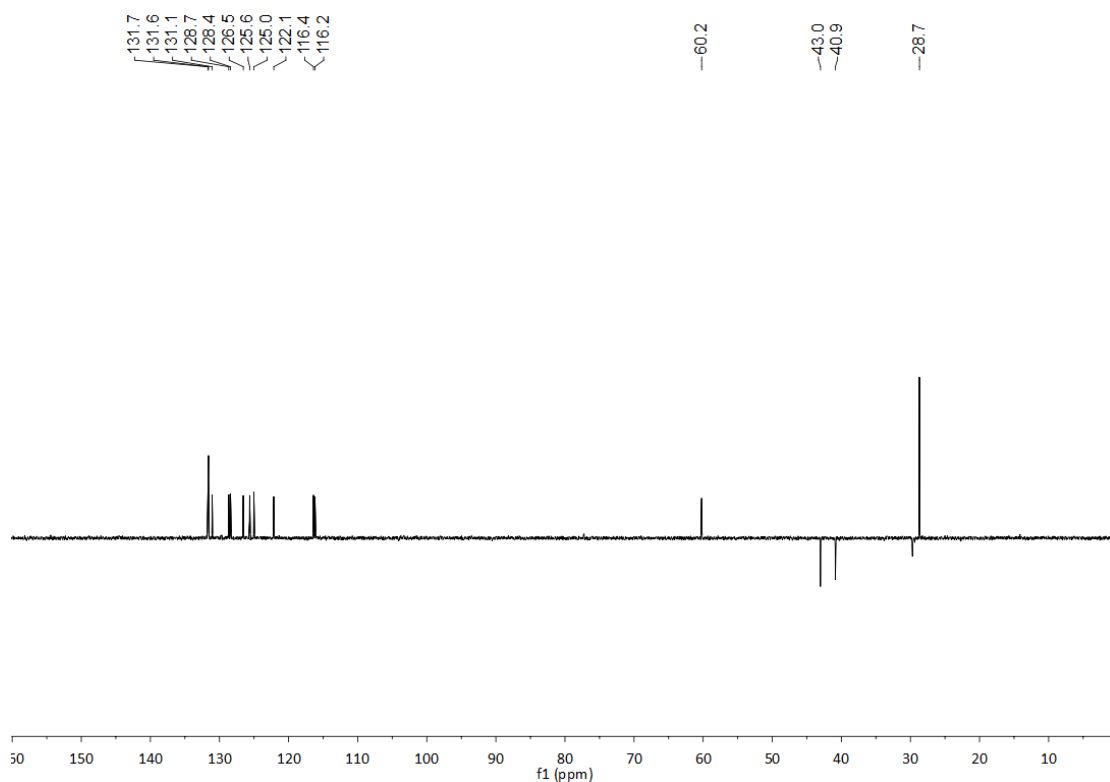

**<sup>19</sup>F NMR (376 MHz, CDCl<sub>3</sub>)**

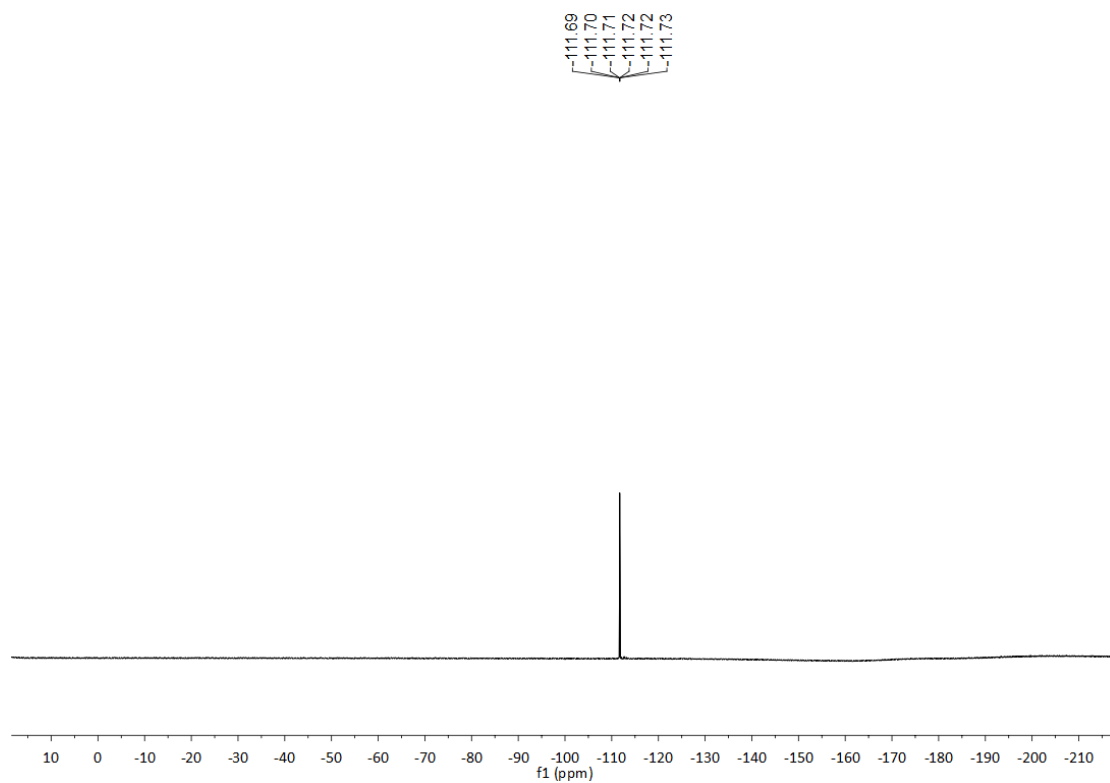

8 crude <sup>1</sup>H NMR

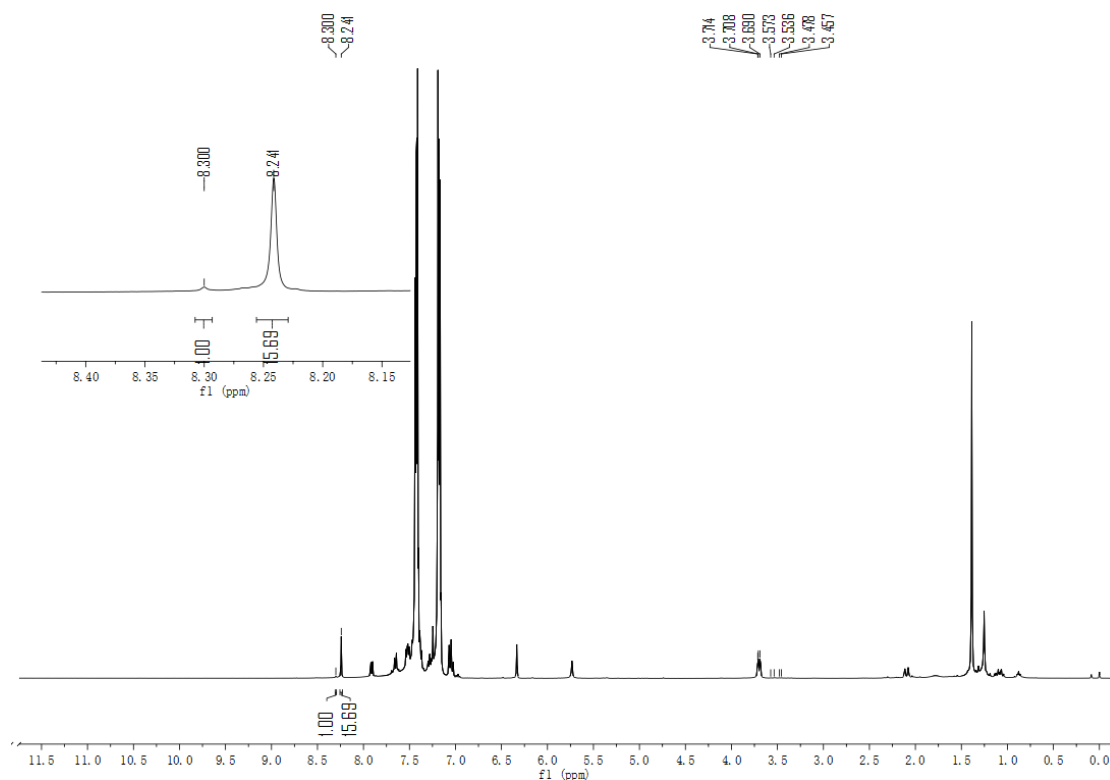

**N-(tert-butyl)-2-(2-fluorophenyl)-2-(1-oxo-3,4-dihydrospiro[benzo[c]azepine-5,3'-indol]-2(1H)-yl) acetamide (9down)**

**<sup>1</sup>H NMR (400 MHz, CDCl<sub>3</sub>):**

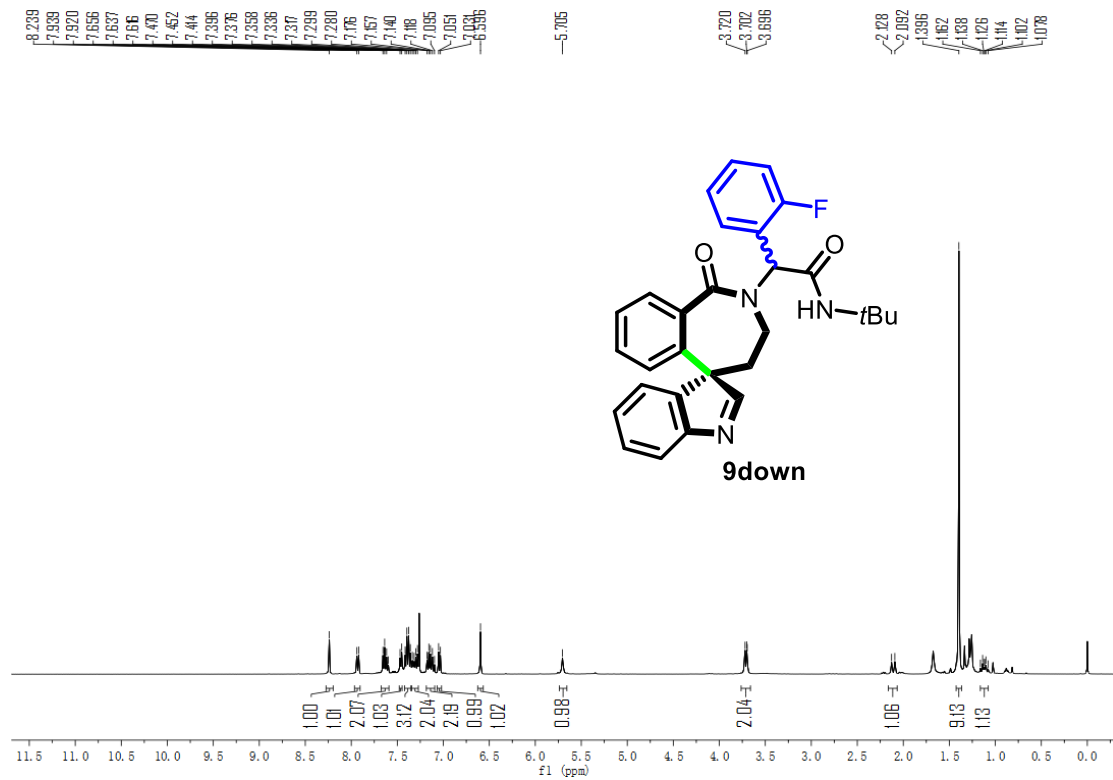

**<sup>13</sup>C NMR (100 MHz, CDCl<sub>3</sub>):**

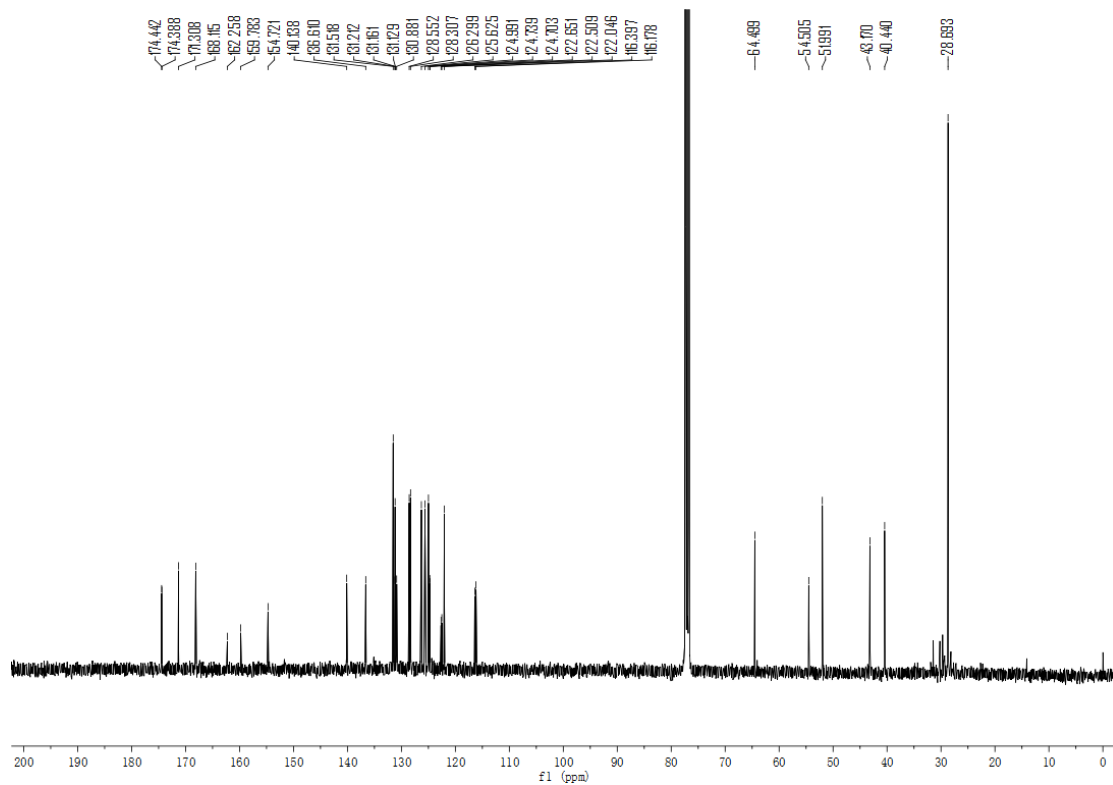

**DEPT**

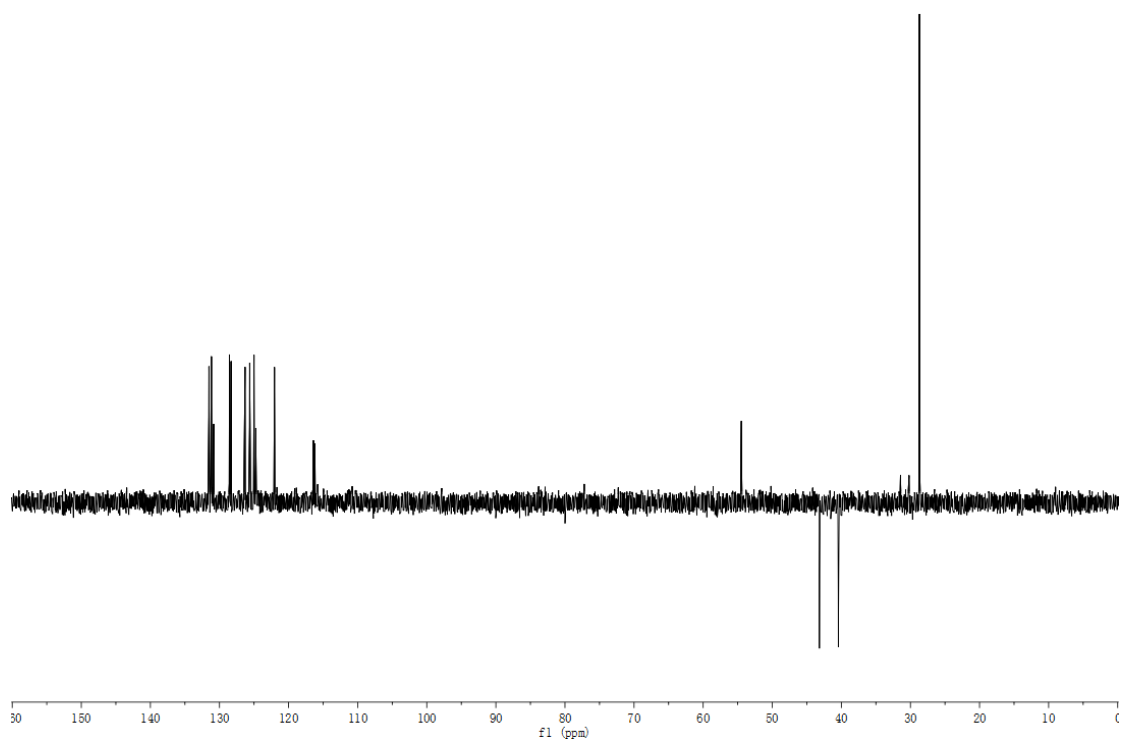

HSQC

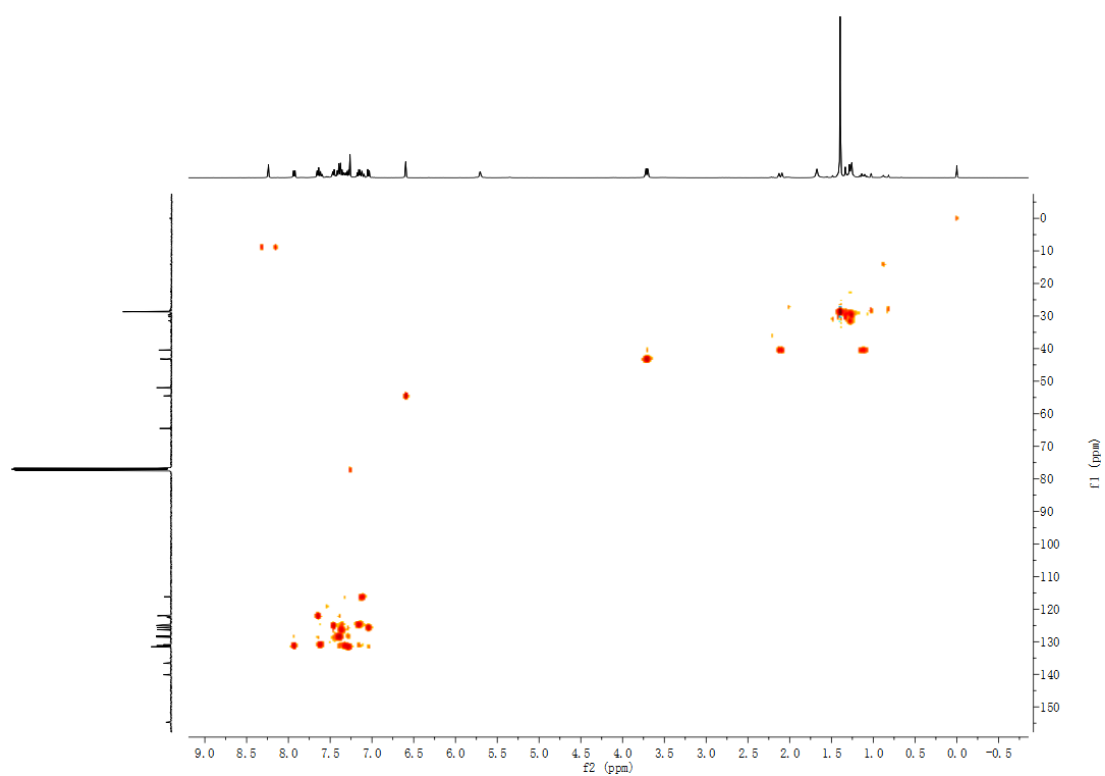

$^{19}\text{F}$  NMR (376 MHz,  $\text{CDCl}_3$ )

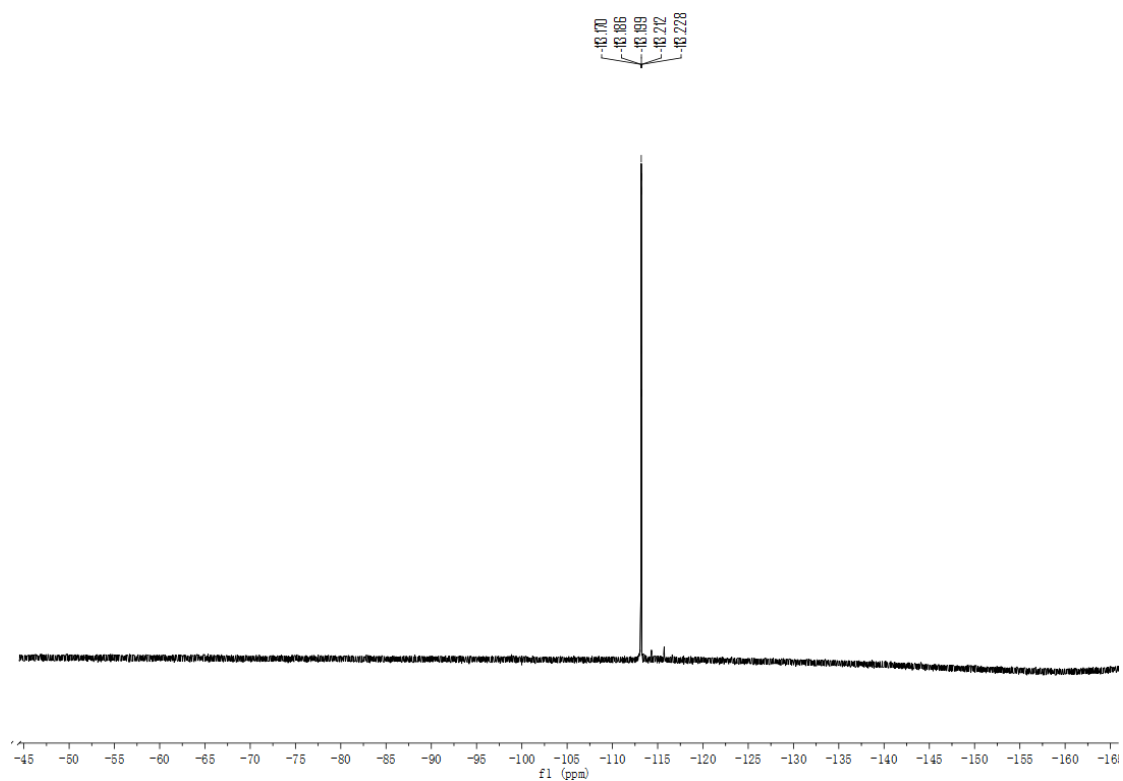

**N-(tert-butyl)-2-(2-fluorophenyl)-2-(1-oxo-3,4-dihydrospiro[benzo[c]azepine-5,3'-indol]-2(1H)-yl) acetamide (9up)**

**<sup>1</sup>H NMR (400 MHz, CDCl<sub>3</sub>):**

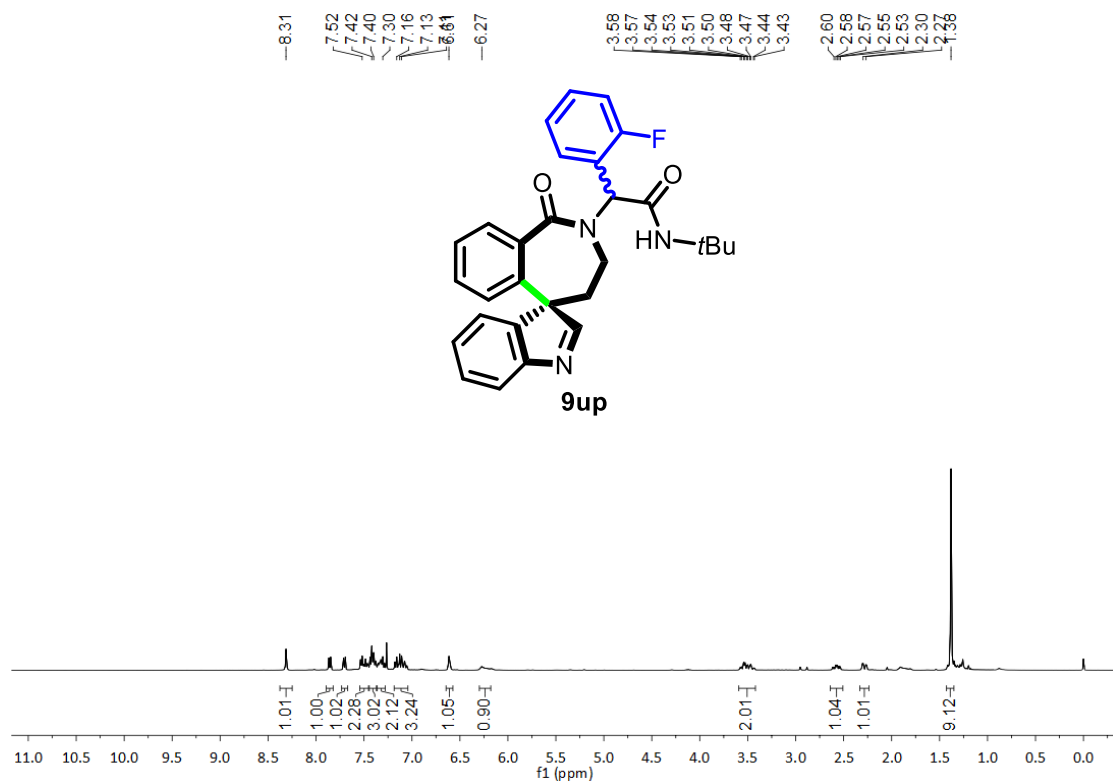

**<sup>13</sup>C NMR (100 MHz, CDCl<sub>3</sub>):**



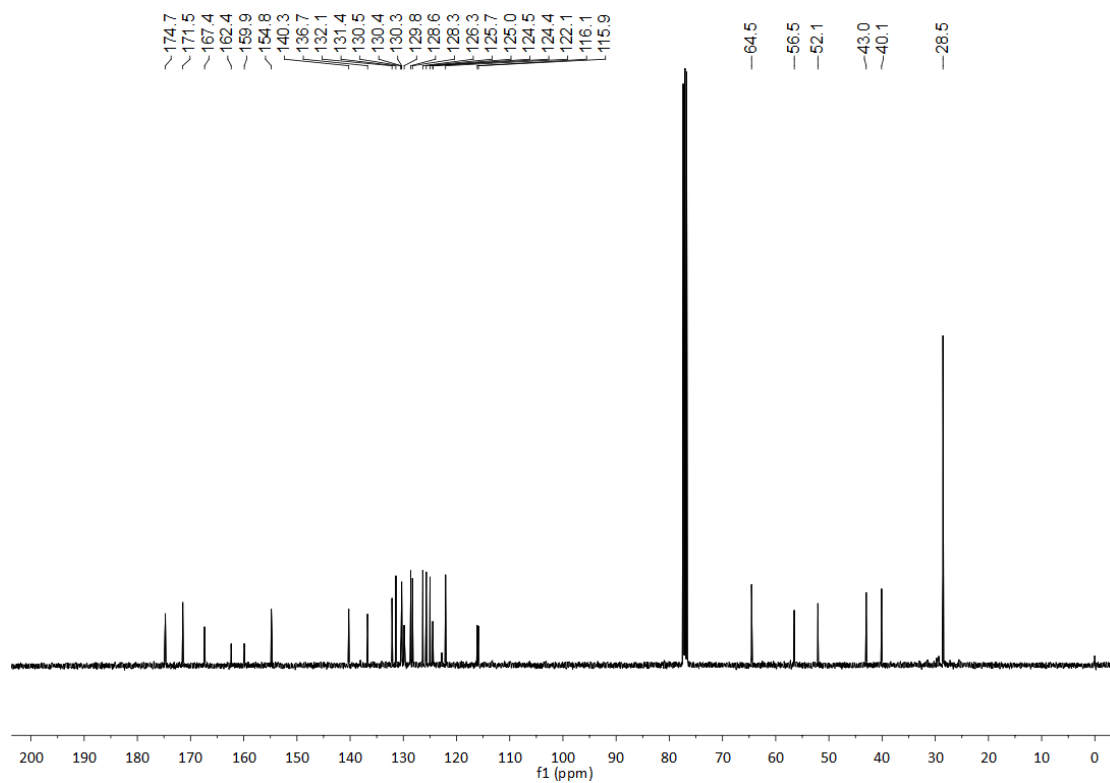

**DEPT**

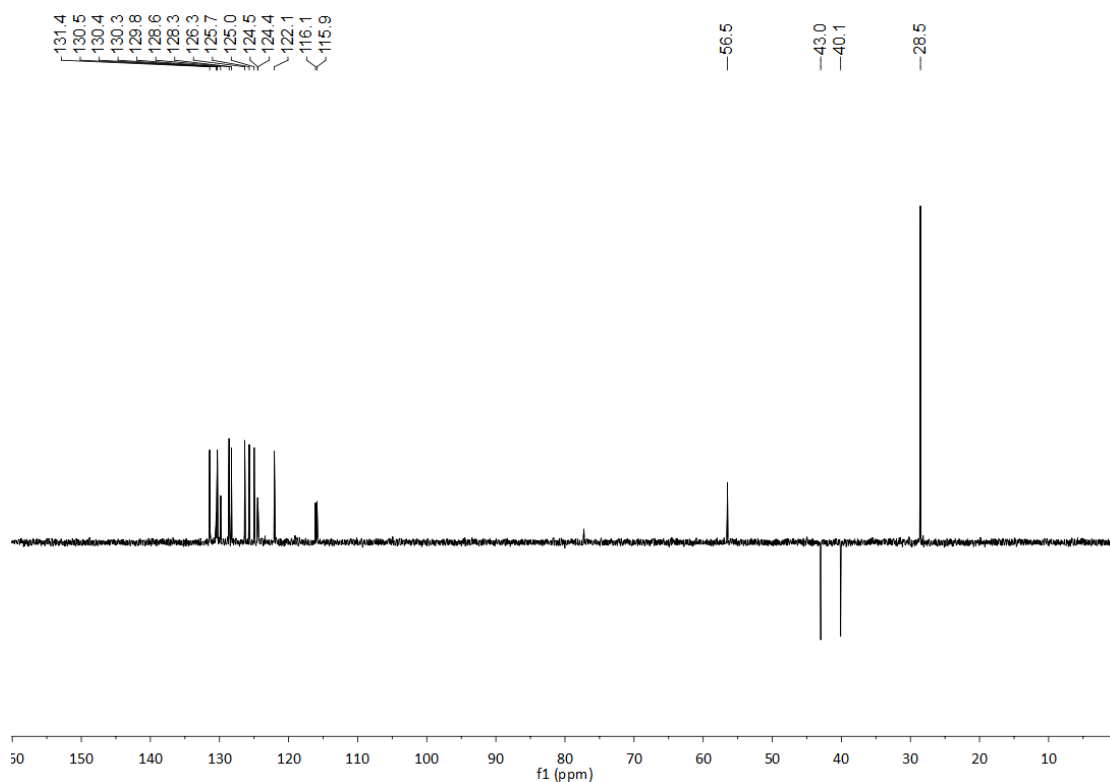

**<sup>19</sup>F NMR (376 MHz, CDCl<sub>3</sub>)**

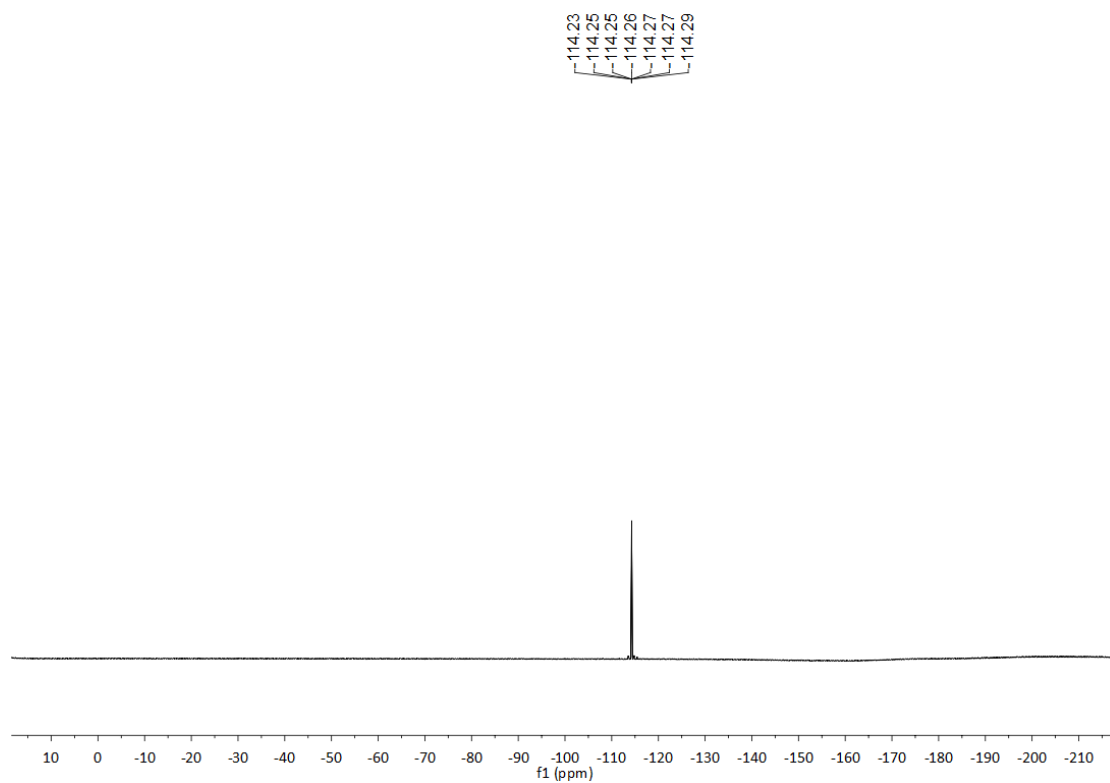

**9** crude  $^1\text{H}$  NMR

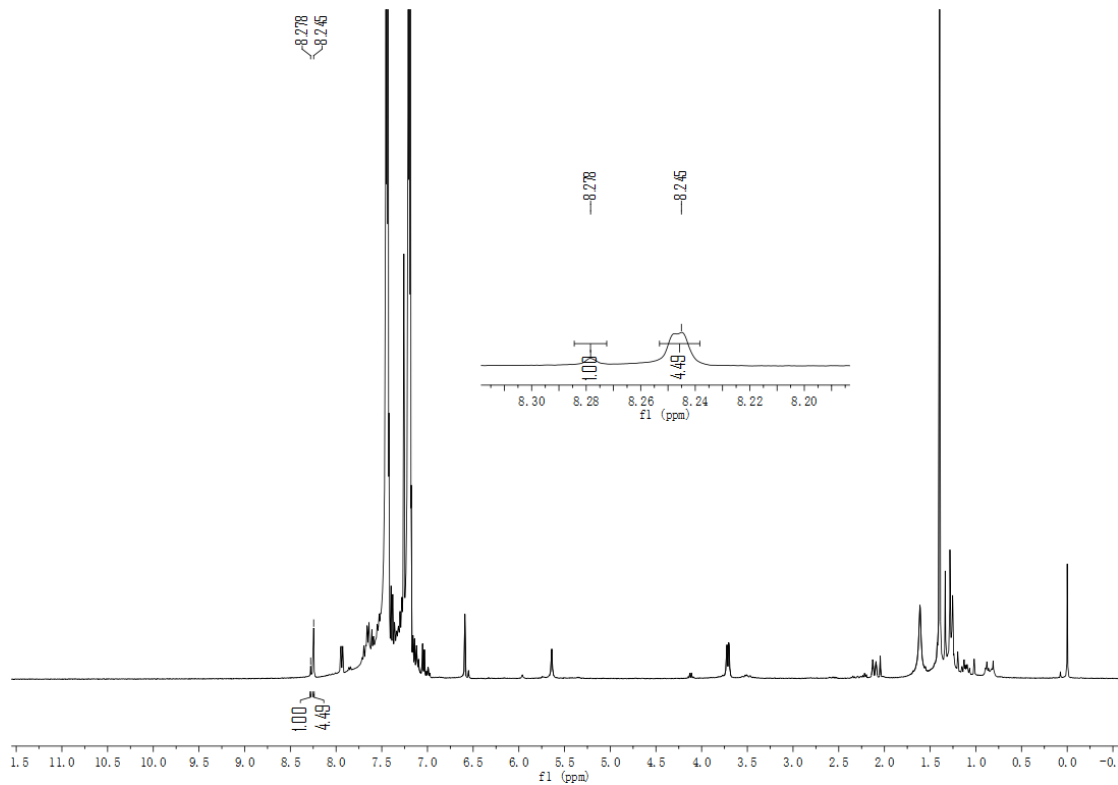

**N-(tert-butyl)-2-(3,4-dichlorophenyl)-2-(1-oxo-3,4-dihydrospiro[benzo[c]azepine-5,3'-indol]-2(1H)-yl)acetamide (10down)**

$^1\text{H}$  NMR (400 MHz,  $\text{CDCl}_3$ ):

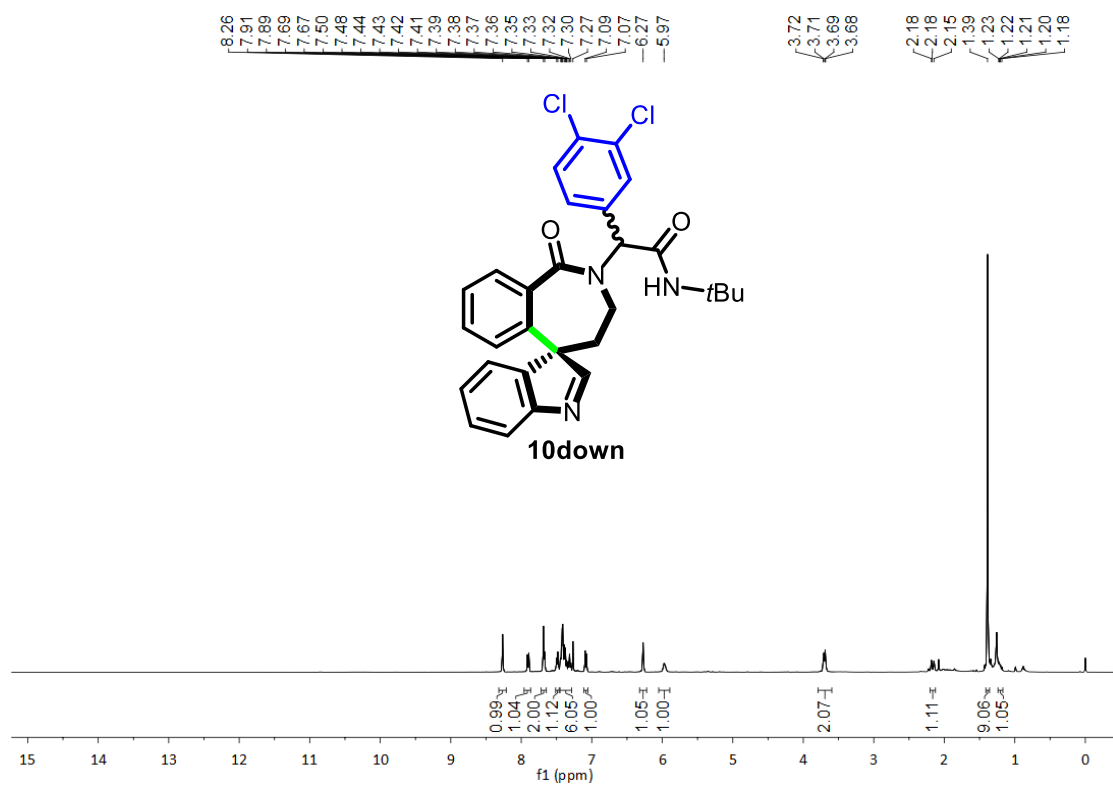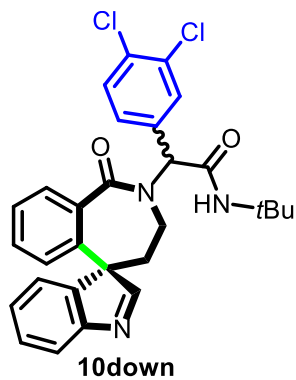

**<sup>13</sup>C NMR (100 MHz, CDCl<sub>3</sub>):**

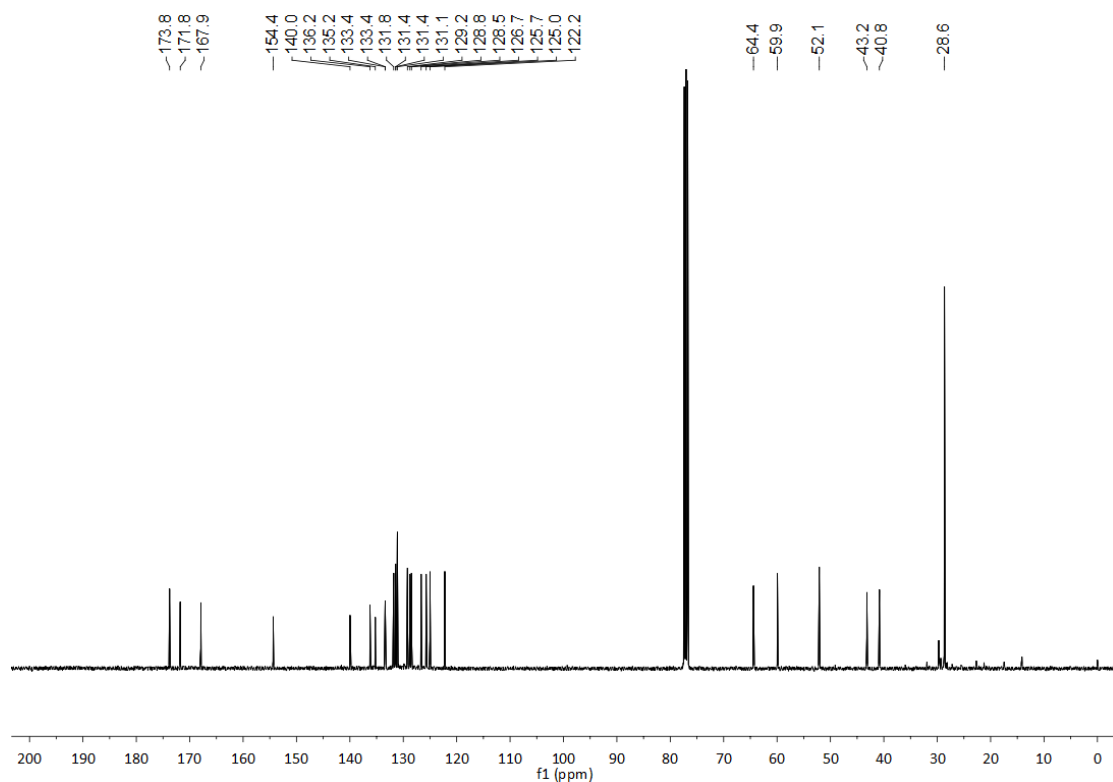

**DEPT**

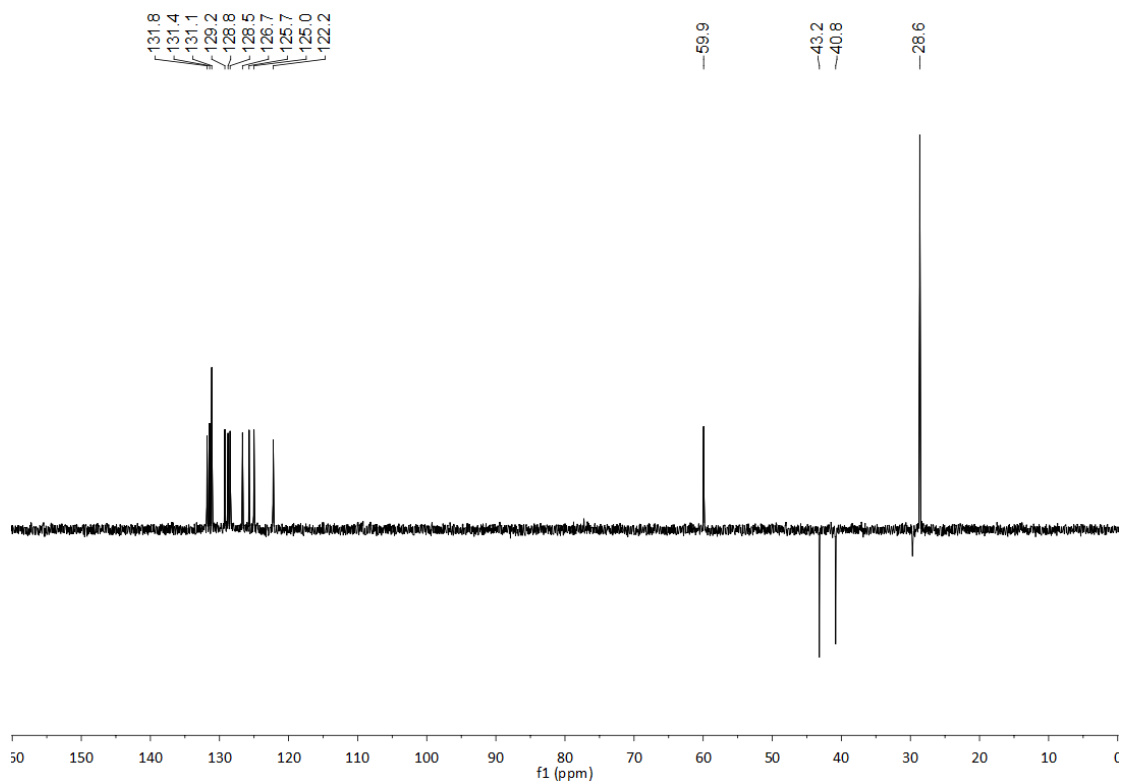

HSQC

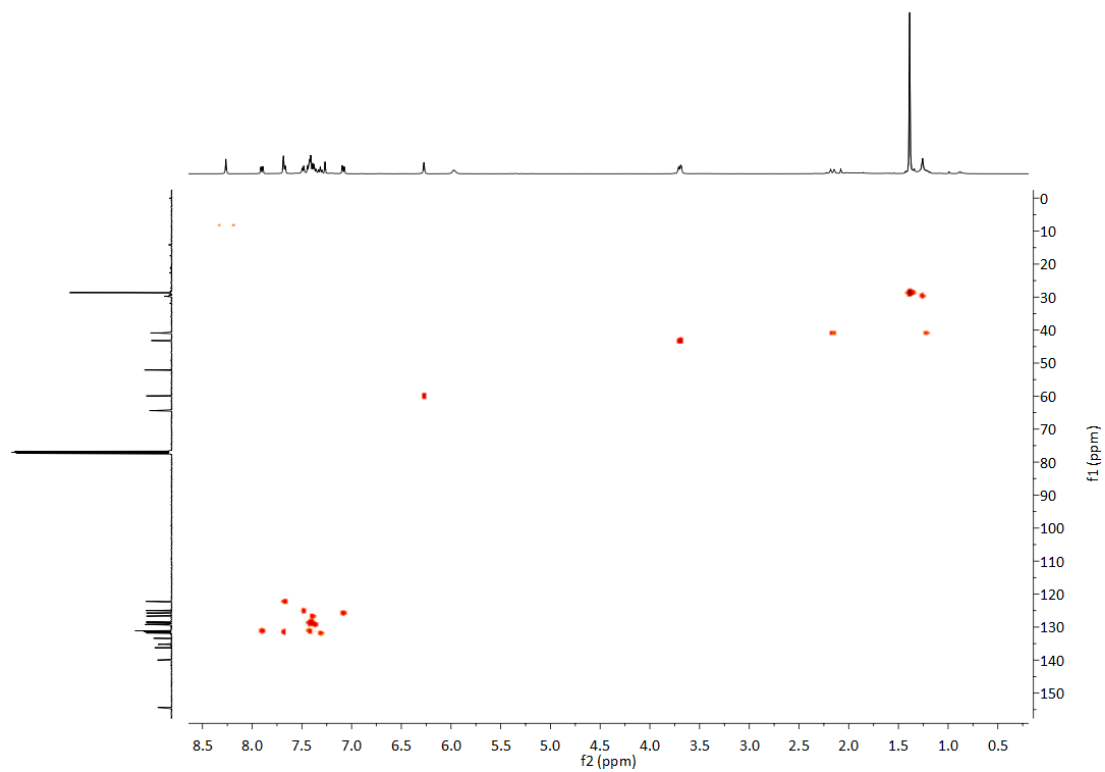

**N-(tert-butyl)-2-(3,4-dichlorophenyl)-2-(1-oxo-3,4-dihydrospiro[benzo[c]azepine-5,3'-indol]-2(1H)-yl)acetamide (10up)**

**<sup>1</sup>H NMR (400 MHz, CDCl<sub>3</sub>):**

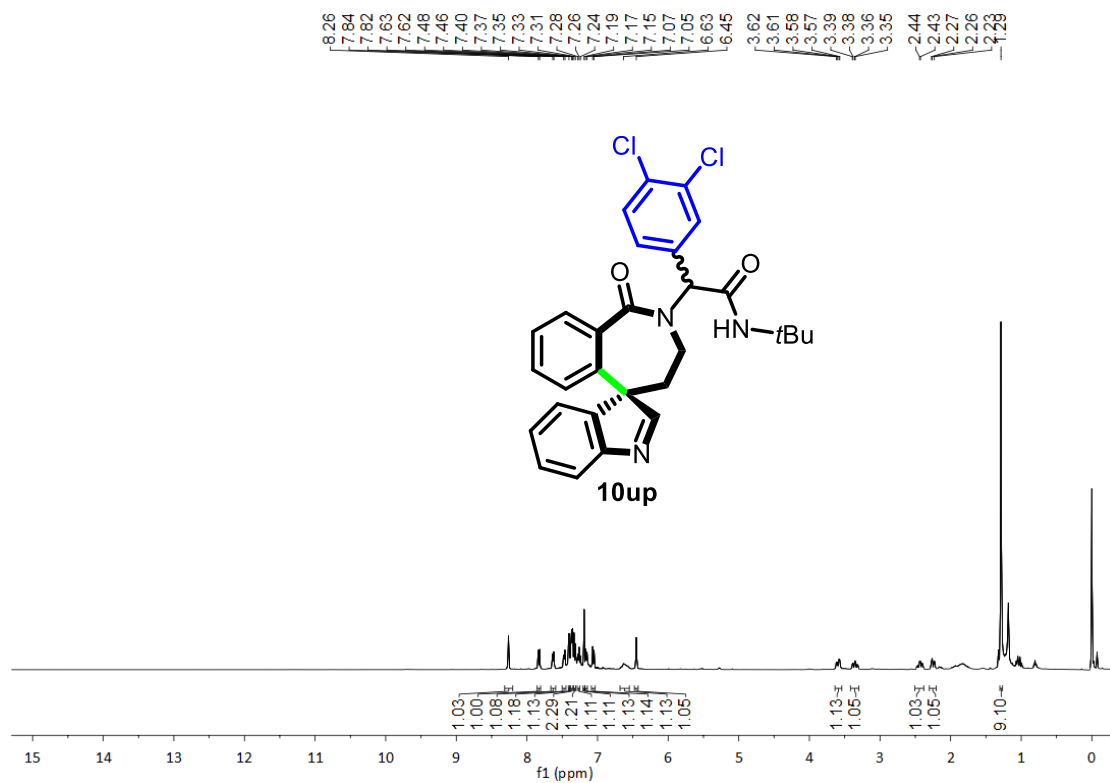

**<sup>13</sup>C NMR (100 MHz, CDCl<sub>3</sub>):**

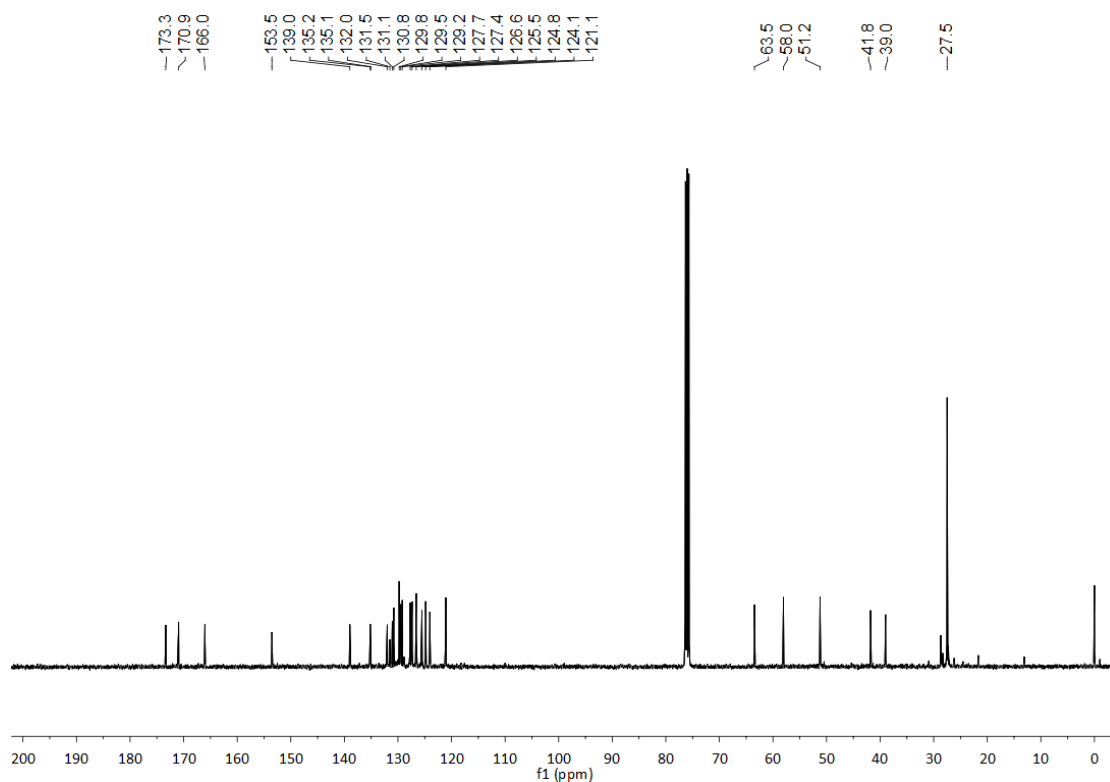

**DEPT**

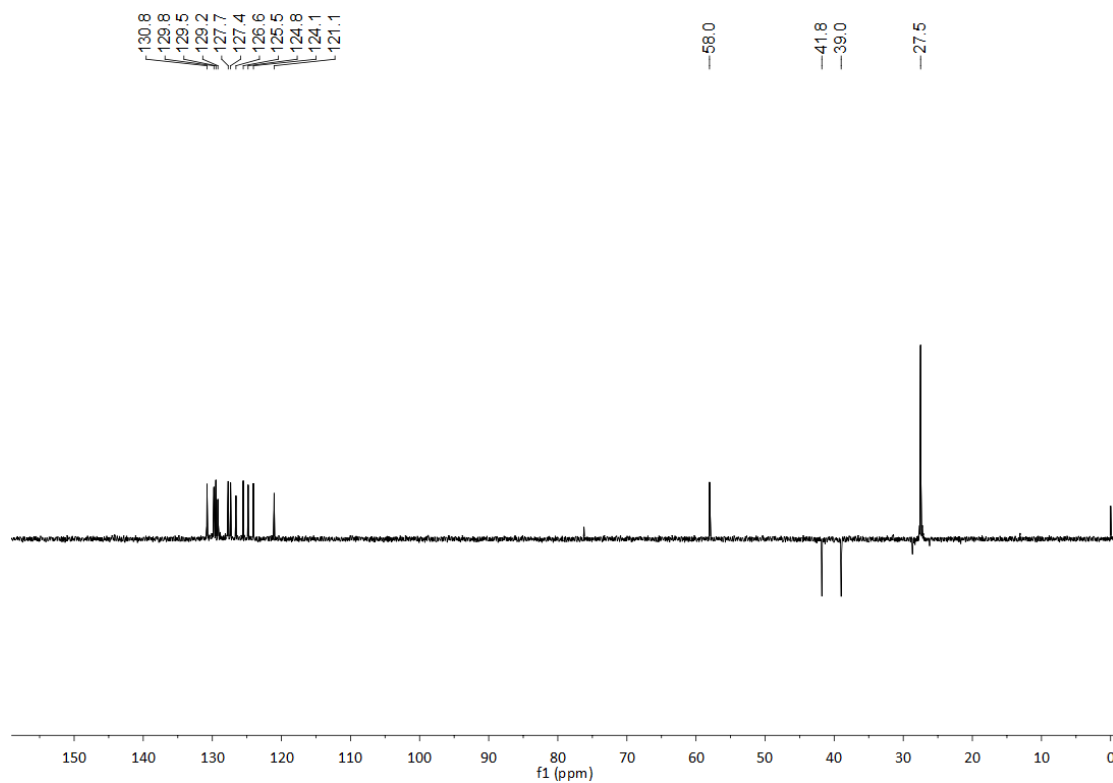

10 crude  $^1\text{H}$  NMR

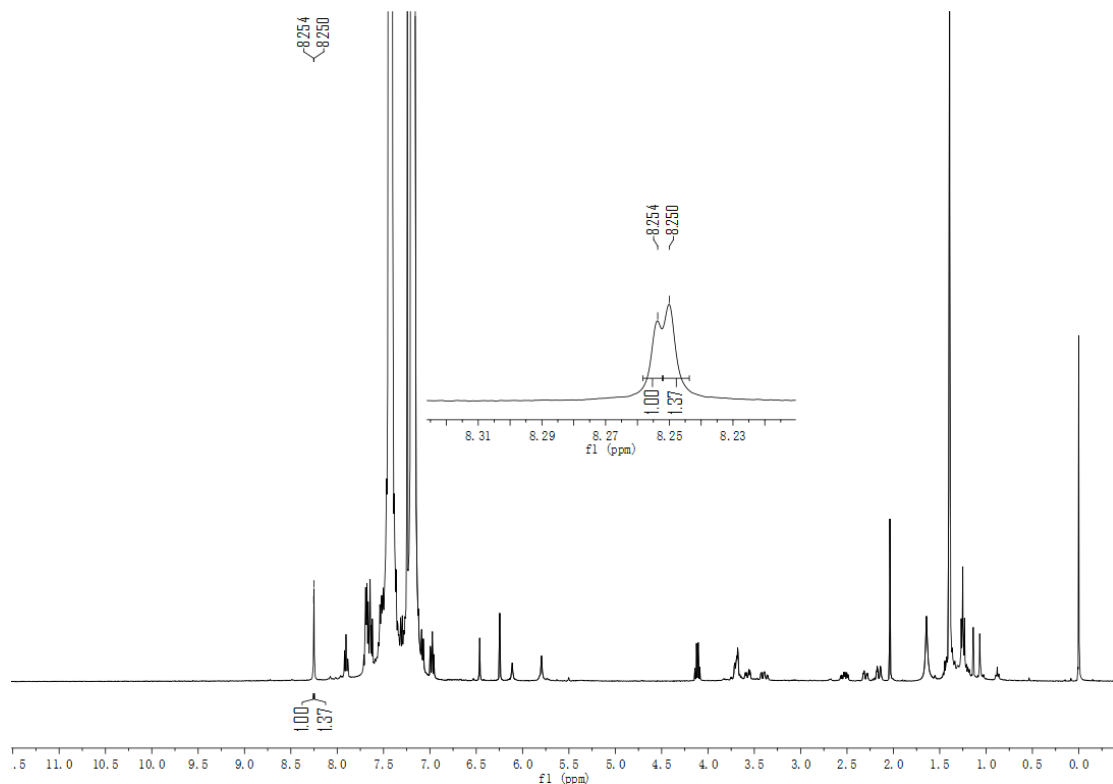

2-(2-(1H-indol-3-yl)ethyl)-N-(tert-butyl)-1-(3,4-dichlorophenyl)-3-oxoisindoline-1-carboxamide  
(10')

$^1\text{H}$  NMR (400 MHz,  $\text{CDCl}_3$ ):

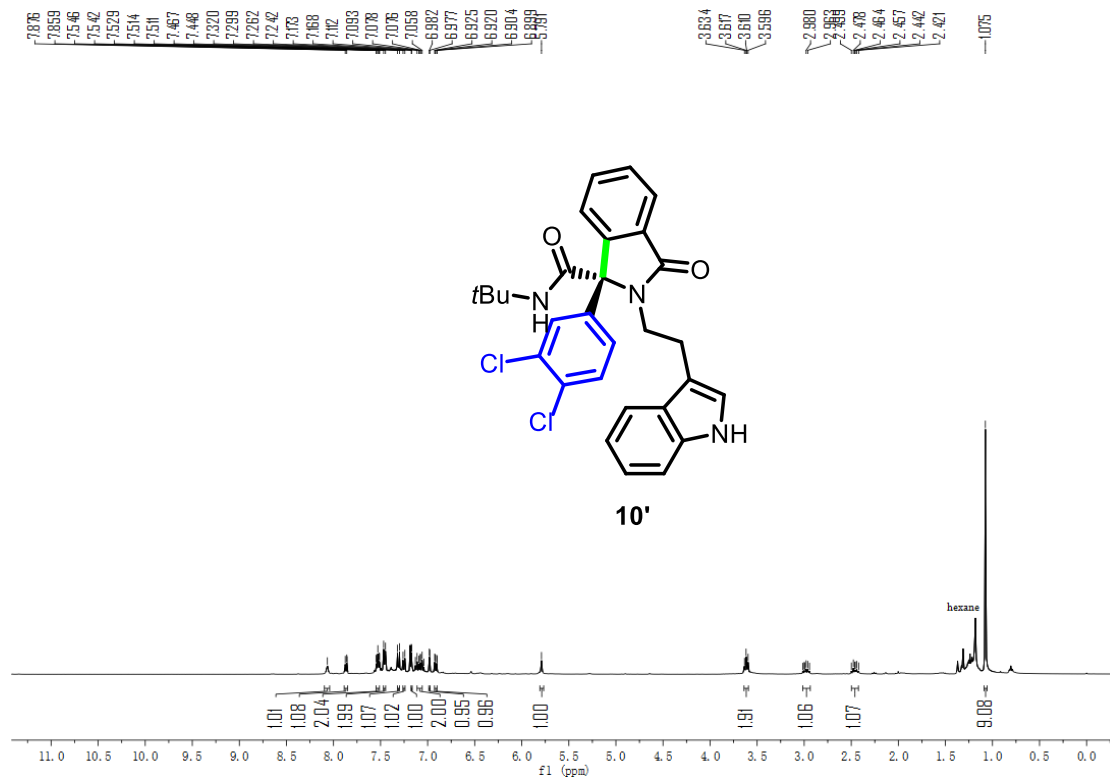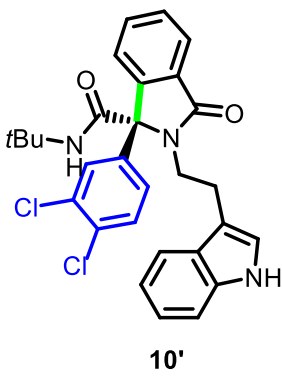

**<sup>13</sup>C NMR (100 MHz, CDCl<sub>3</sub>):**

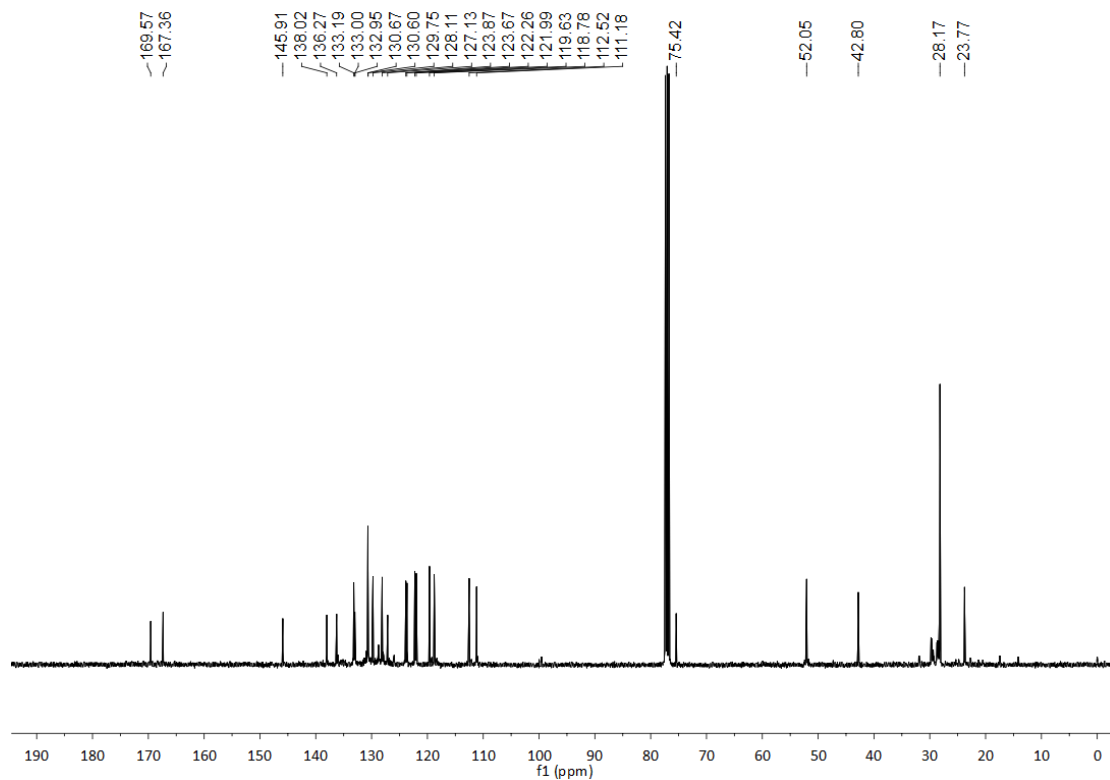

**DEPT**

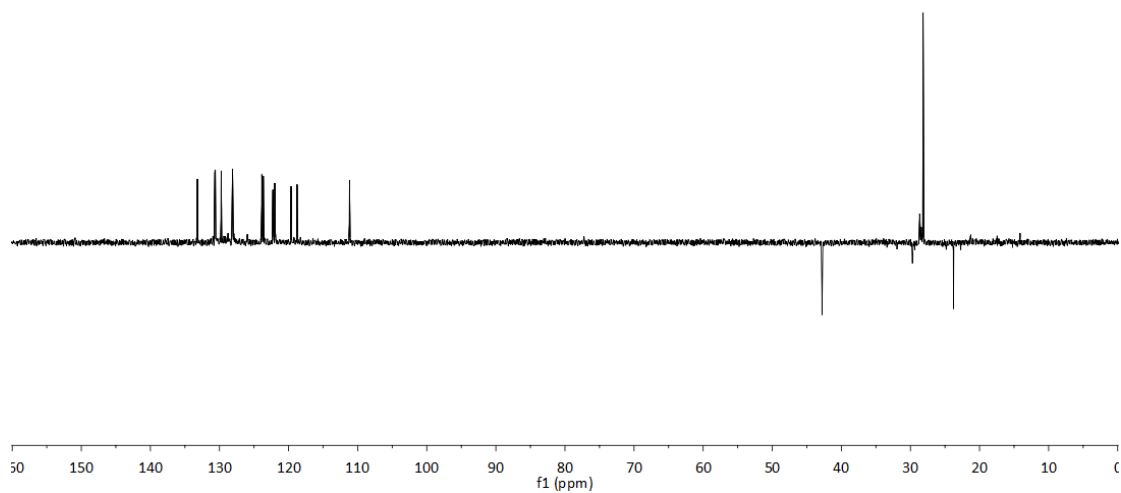

**methyl-4-(2-(tert-butylamino)-2-oxo-1-(1-oxo-3,4-dihydrospiro[benzo[c]azepine-5,3'-indol]-2(1H)-yl)ethyl)benzoate (11up)**  
<sup>1</sup>H NMR (400 MHz, CDCl<sub>3</sub>):

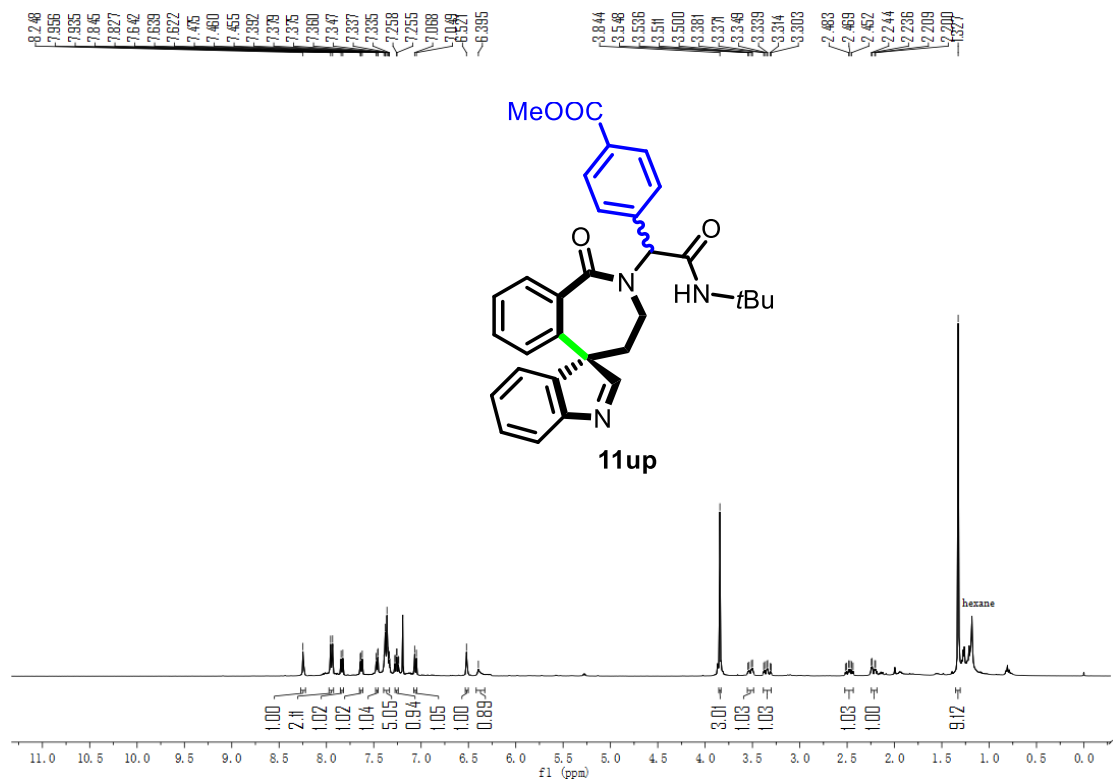

<sup>13</sup>C NMR (100 MHz, CDCl<sub>3</sub>):



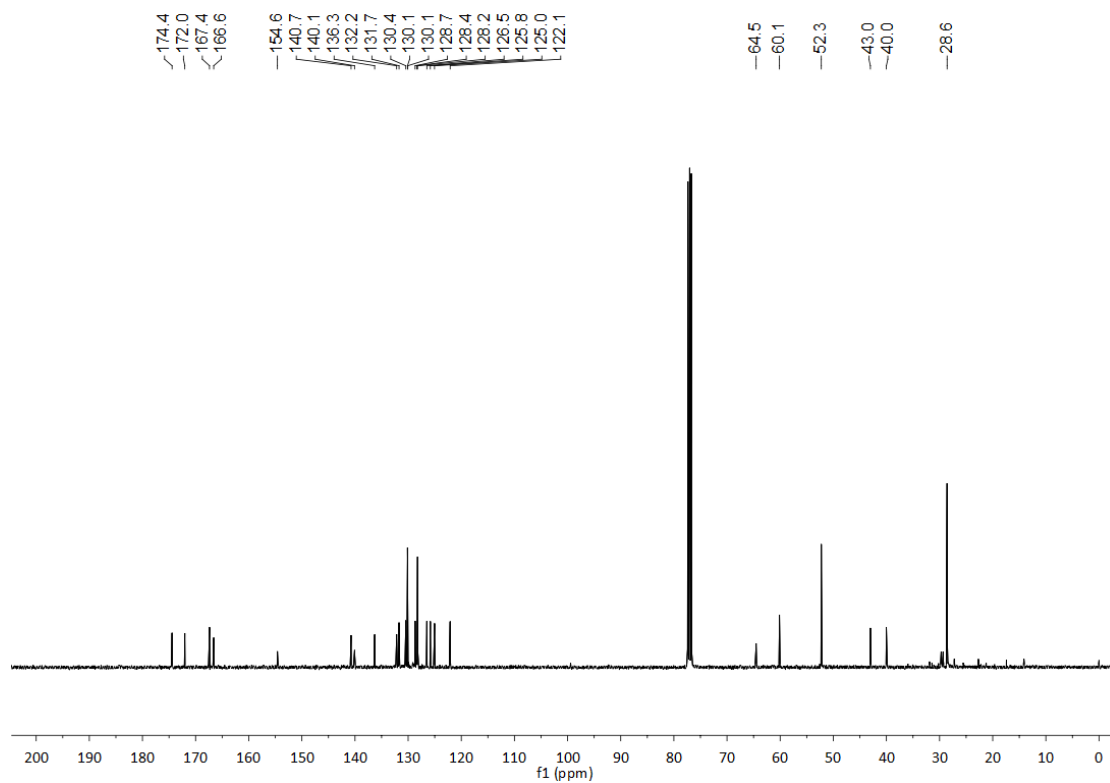

**DEPT**

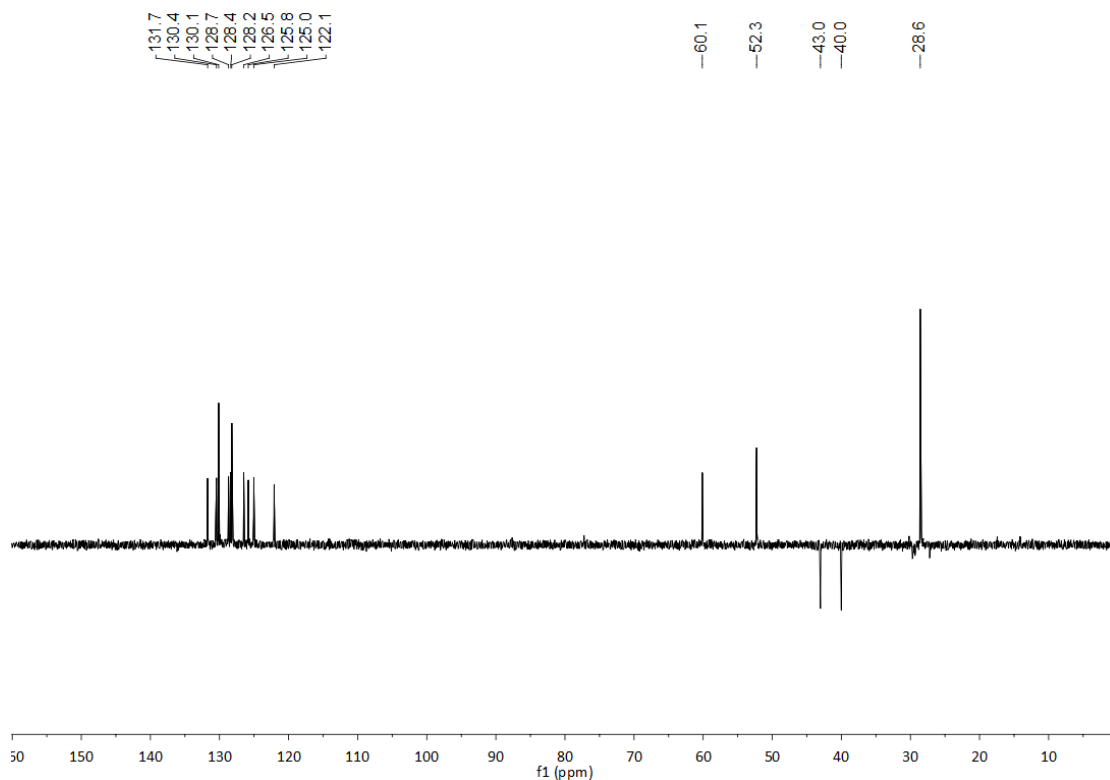

**11** crude  $^1\text{H}$  NMR

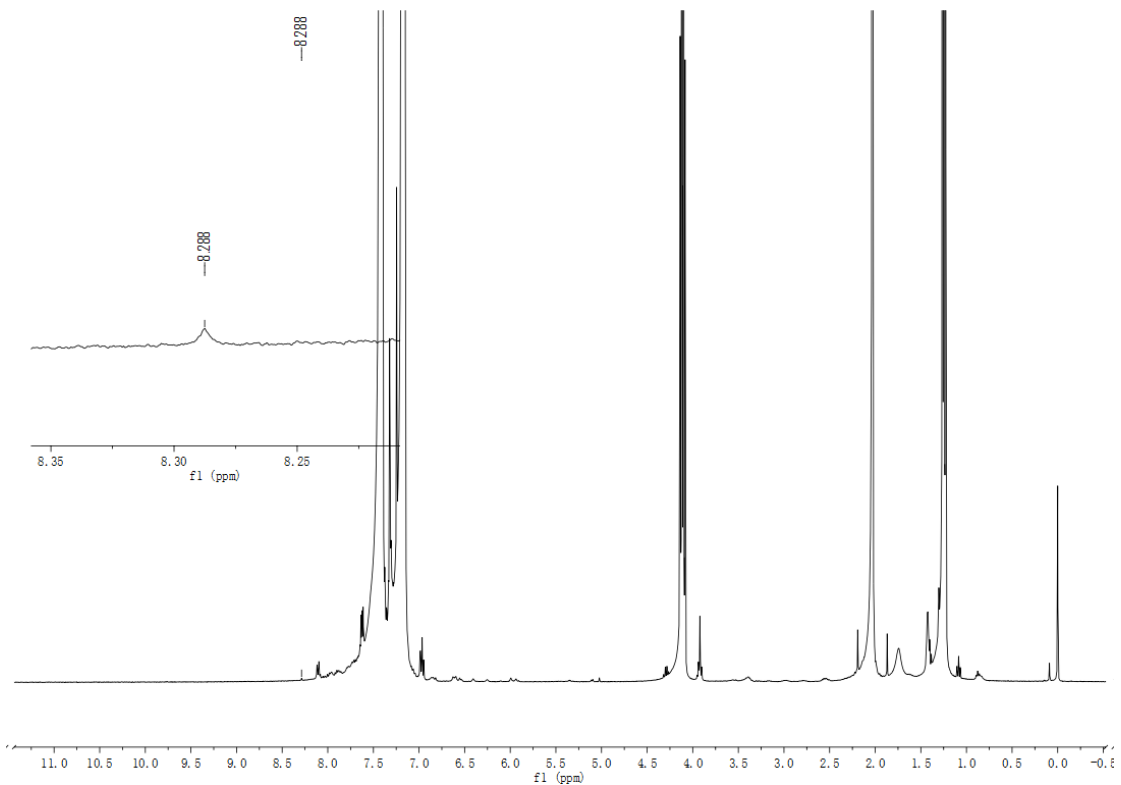

**methyl-4-(2-(2-(1H-indol-3-yl)ethyl)-1-(tert-butylcarbamoyl)-3-oxoisindolin-1-yl)benzoate (11')**  
<sup>1</sup>H NMR (400 MHz, CDCl<sub>3</sub>):

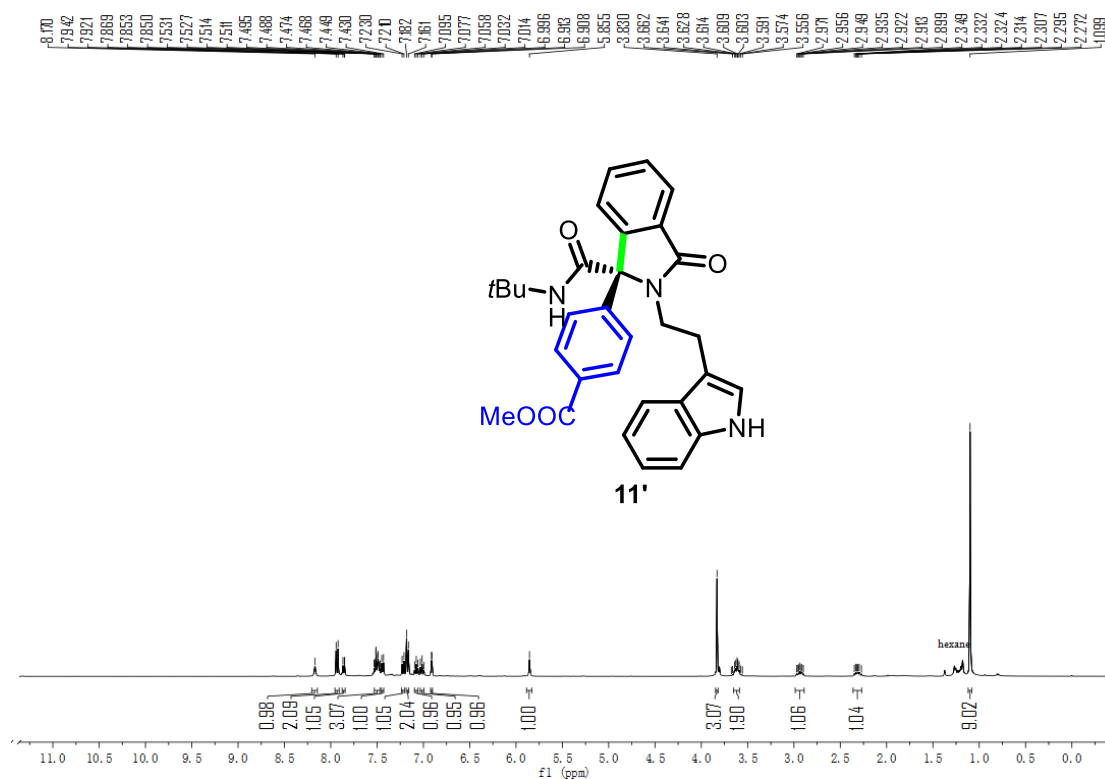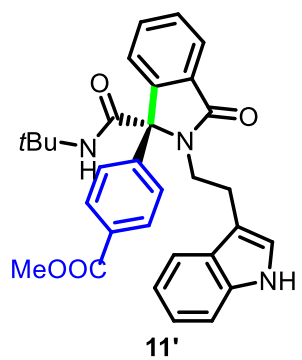

<sup>13</sup>C NMR (100 MHz, CDCl<sub>3</sub>):

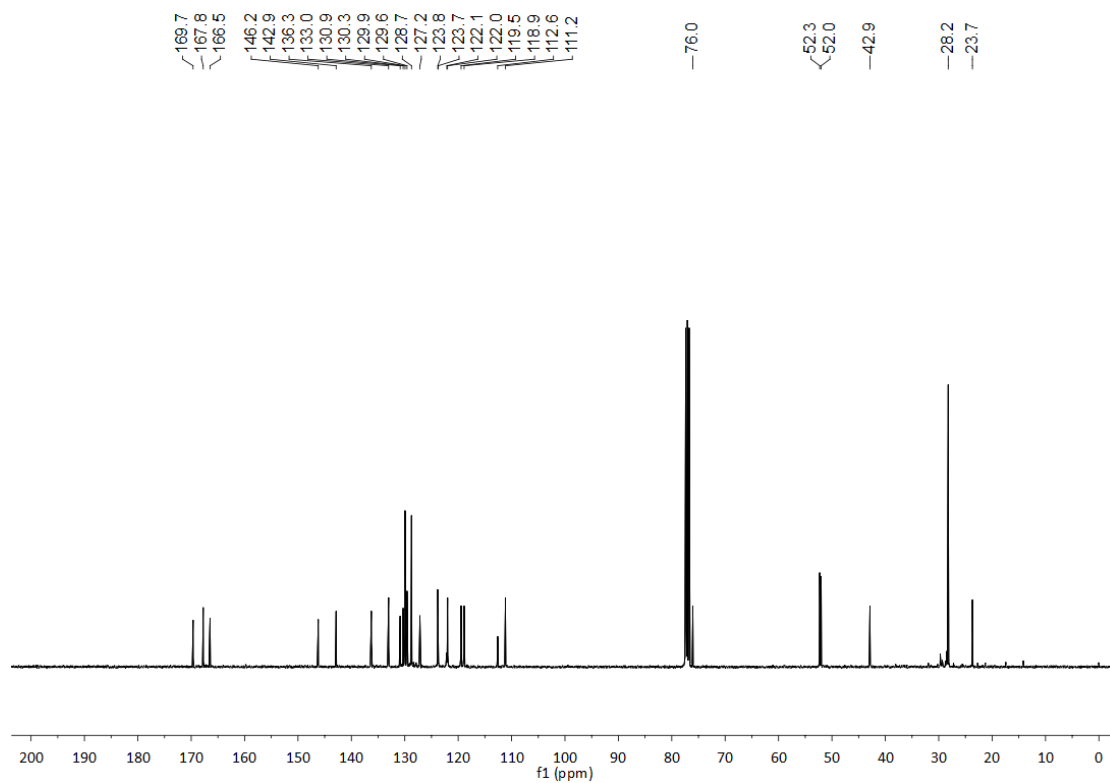

**DEPT**

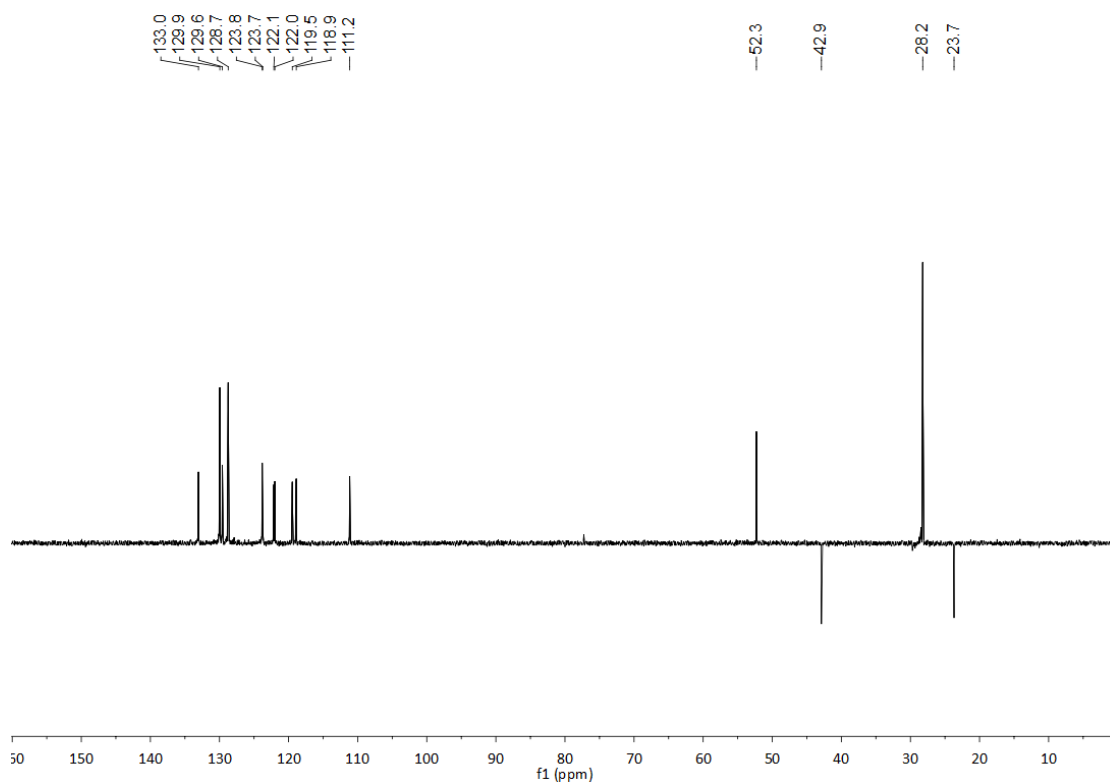

**N-(tert-butyl)-2-(naphthalen-1-yl)-2-(1-oxo-3,4-dihydrospiro[benzo[c]azepine-5,3'-indol]-2(1H)-yl)acetamide (12down)**

**<sup>1</sup>H NMR (400 MHz, CDCl<sub>3</sub>):**

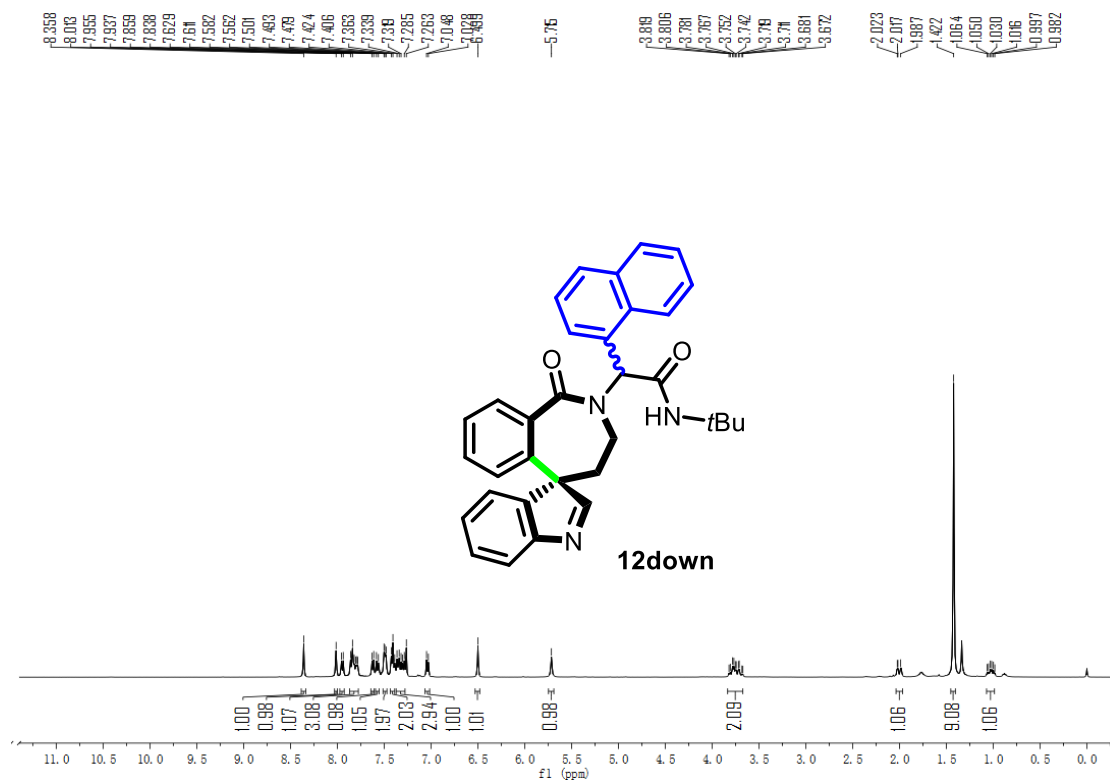

<sup>13</sup>C NMR (100 MHz, CDCl<sub>3</sub>):

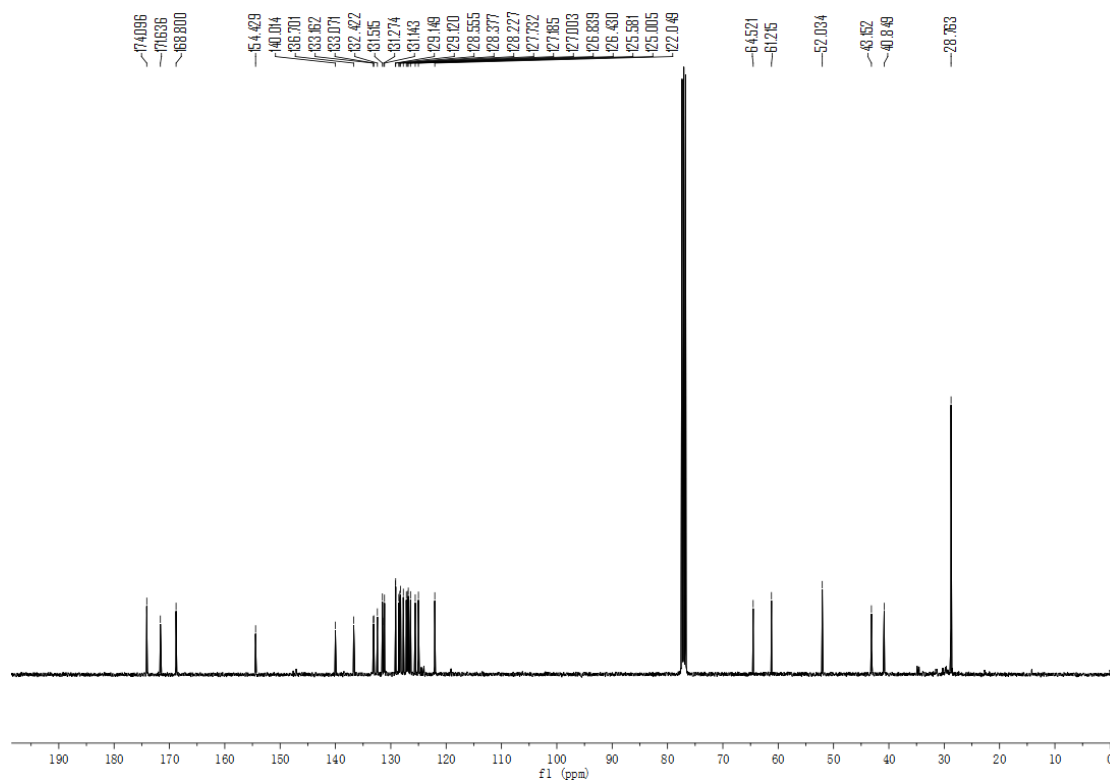

DEPT

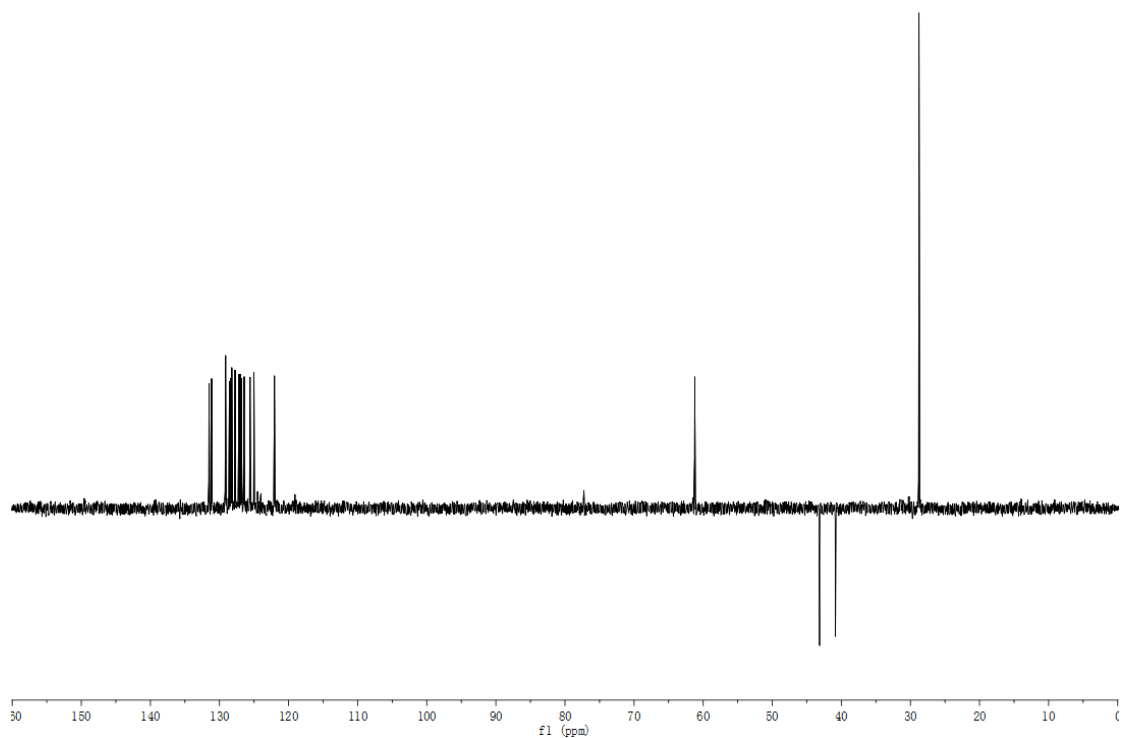

**N-(tert-butyl)-2-(naphthalen-1-yl)-2-(1-oxo-3,4-dihydrospiro[benzo[c]azepine-5,3'-indol]-2(1H)-yl)acetamide (12up)**

**<sup>1</sup>H NMR (400 MHz, CDCl<sub>3</sub>):**

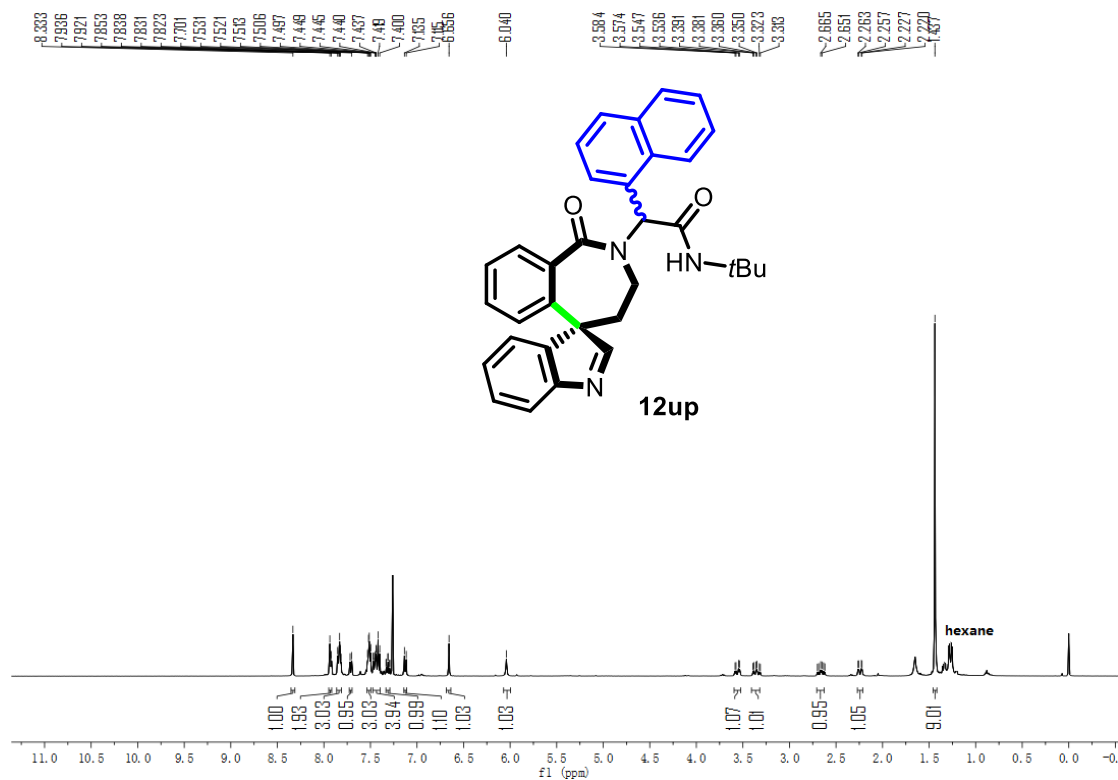

**<sup>13</sup>C NMR (100 MHz, CDCl<sub>3</sub>):**

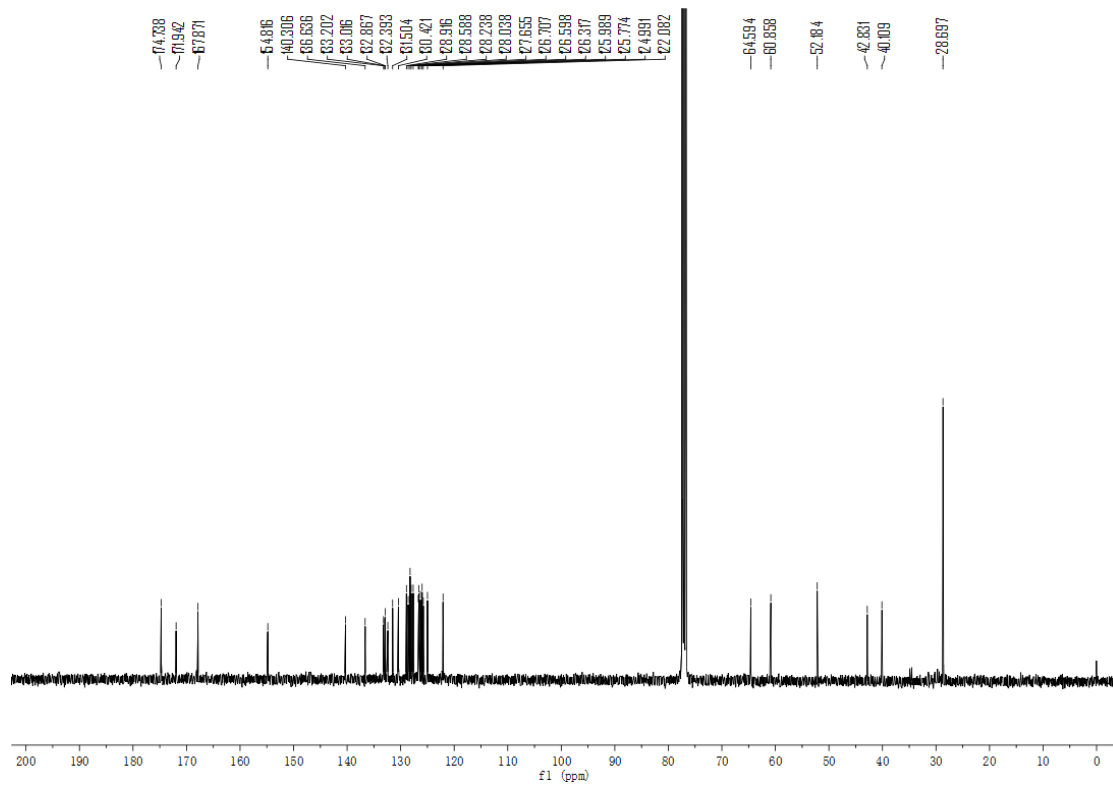

DEPT

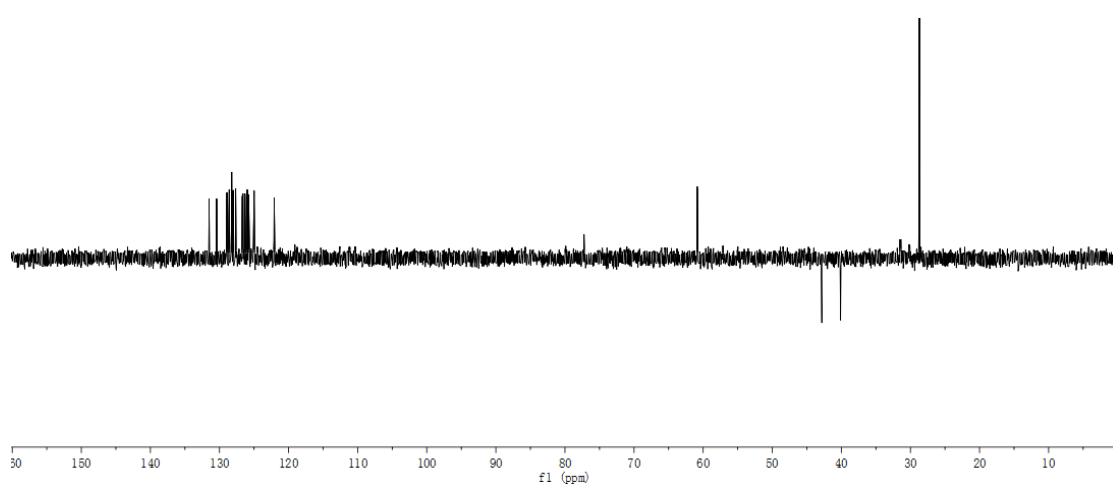

12 crude  $^1\text{H}$  NMR

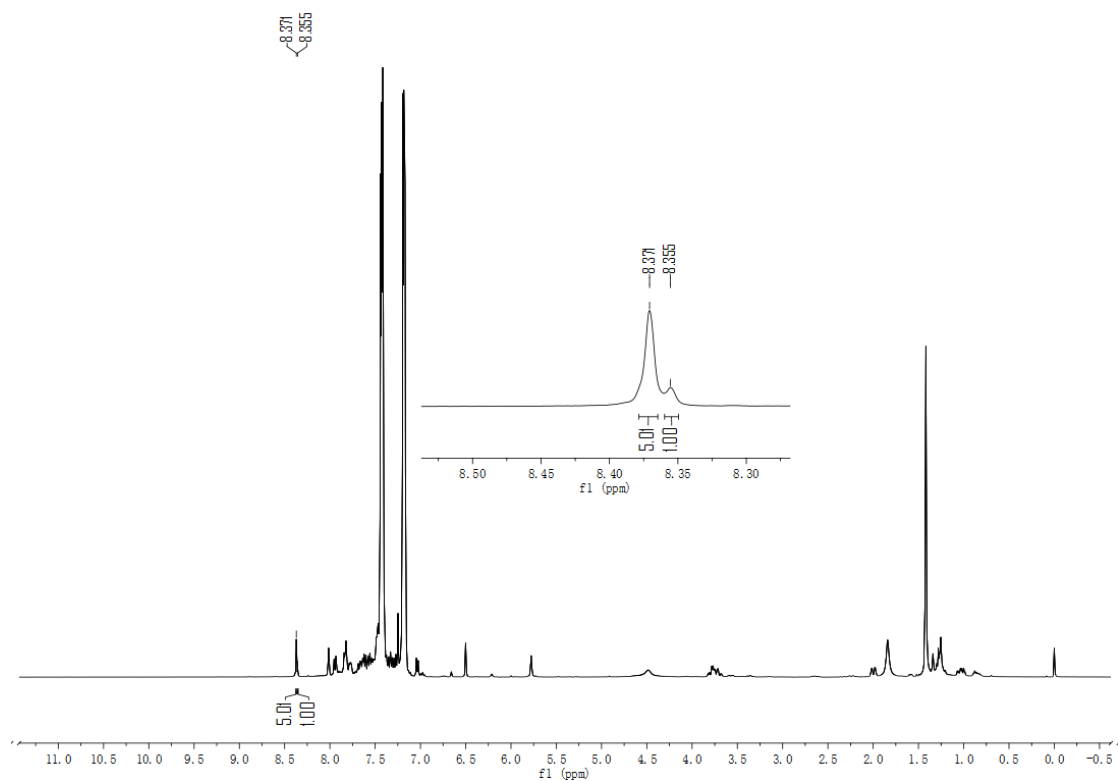

*N*-(*tert*-butyl)-2-(1-oxo-3,4-dihydrospiro[benzo[*c*]azepine-5,3'-indol]-2(1*H*)-yl)-2-(pyridin-3-yl)acetamide (**13down**)

<sup>1</sup>H NMR (400 MHz, CDCl<sub>3</sub>):

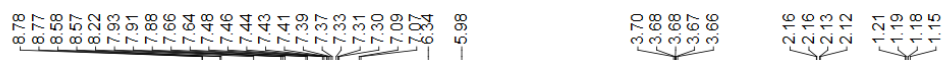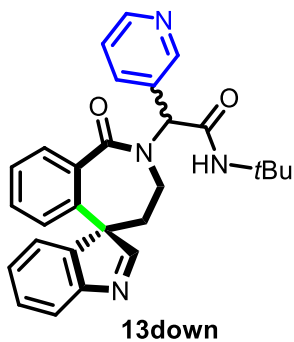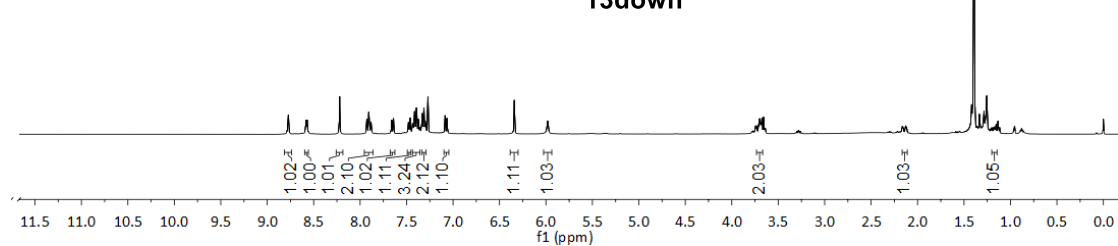

<sup>13</sup>C NMR (100 MHz, CDCl<sub>3</sub>):

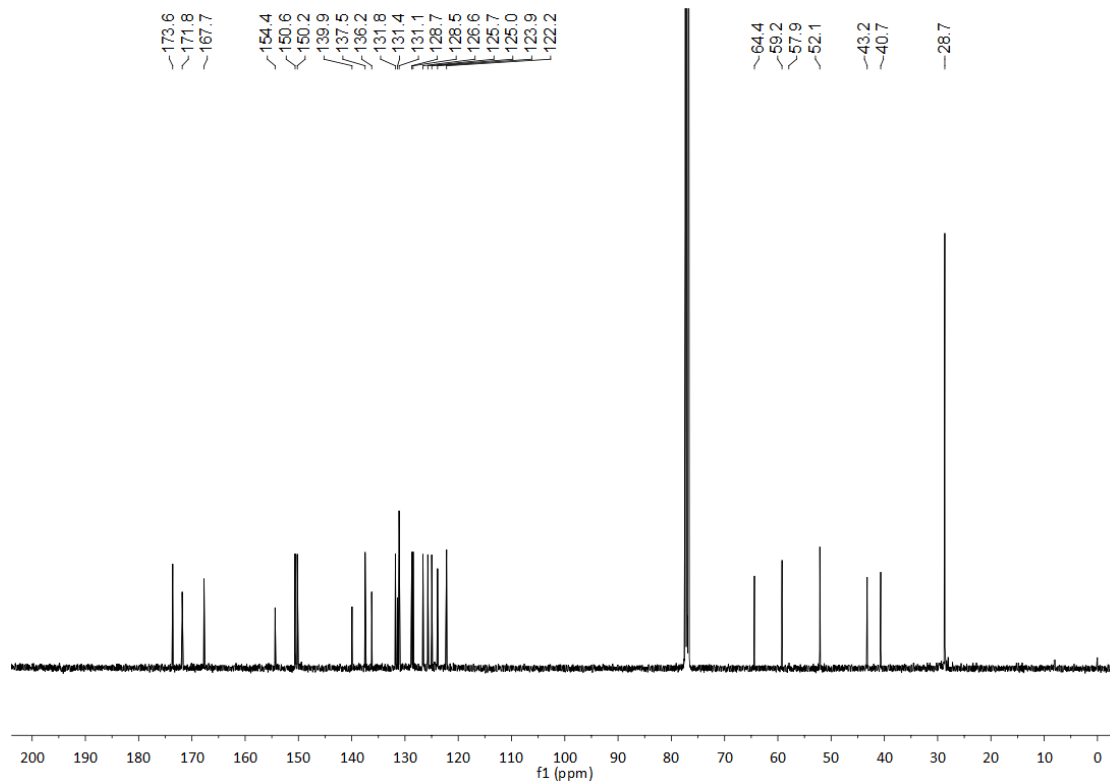

**DEPT**

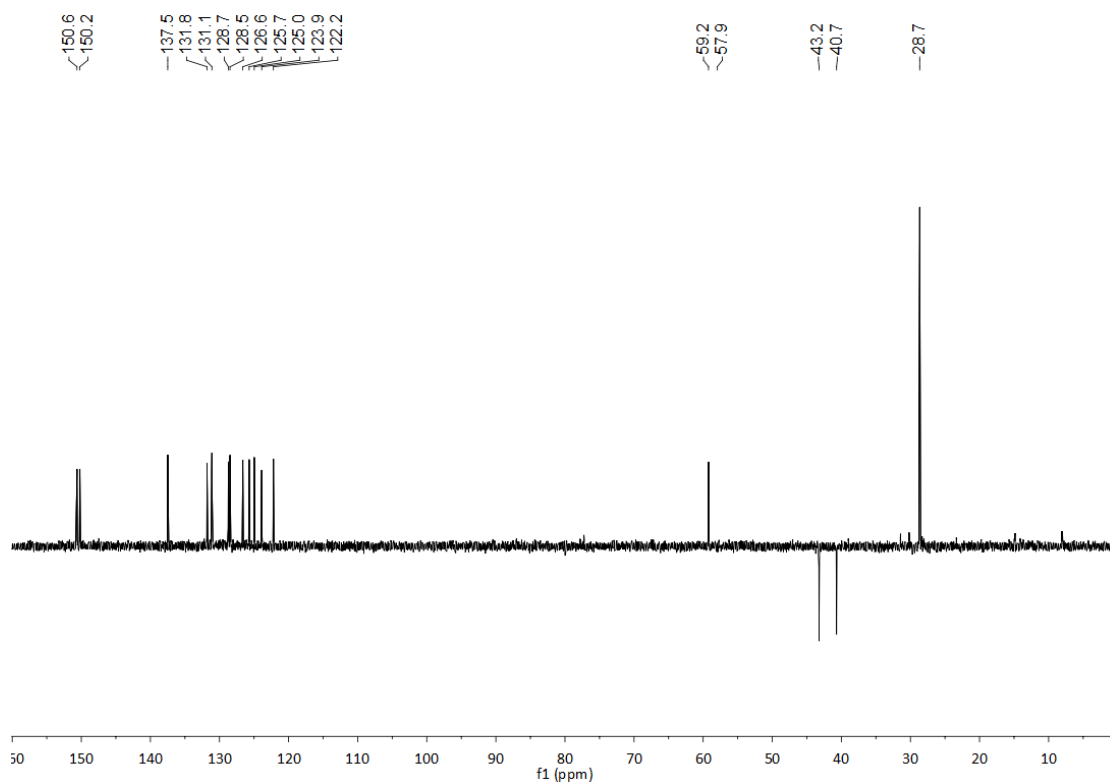

**N-(tert-butyl)-2-(1-oxo-3,4-dihydrospiro[benzo[c]azepine-5,3'-indol]-2(1H)-yl)-2-(pyridin-3-yl)acetamide (13up)**

**<sup>1</sup>H NMR (400 MHz, CDCl<sub>3</sub>):**



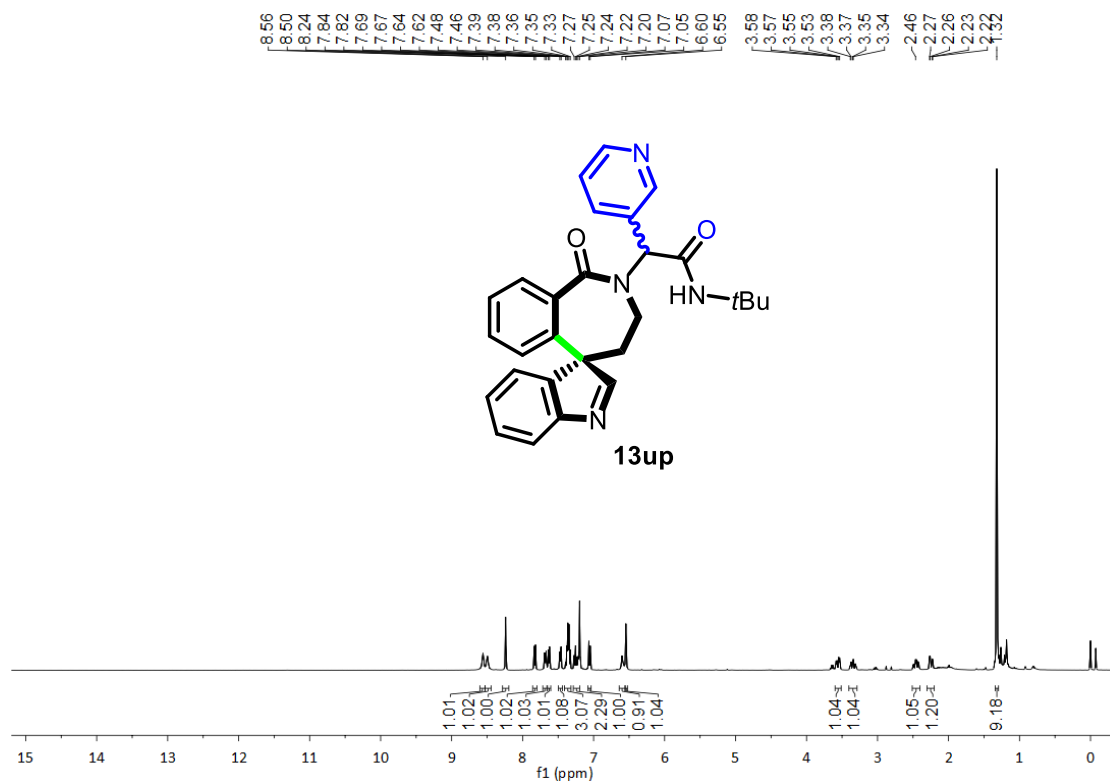

**<sup>13</sup>C NMR (100 MHz, CDCl<sub>3</sub>):**

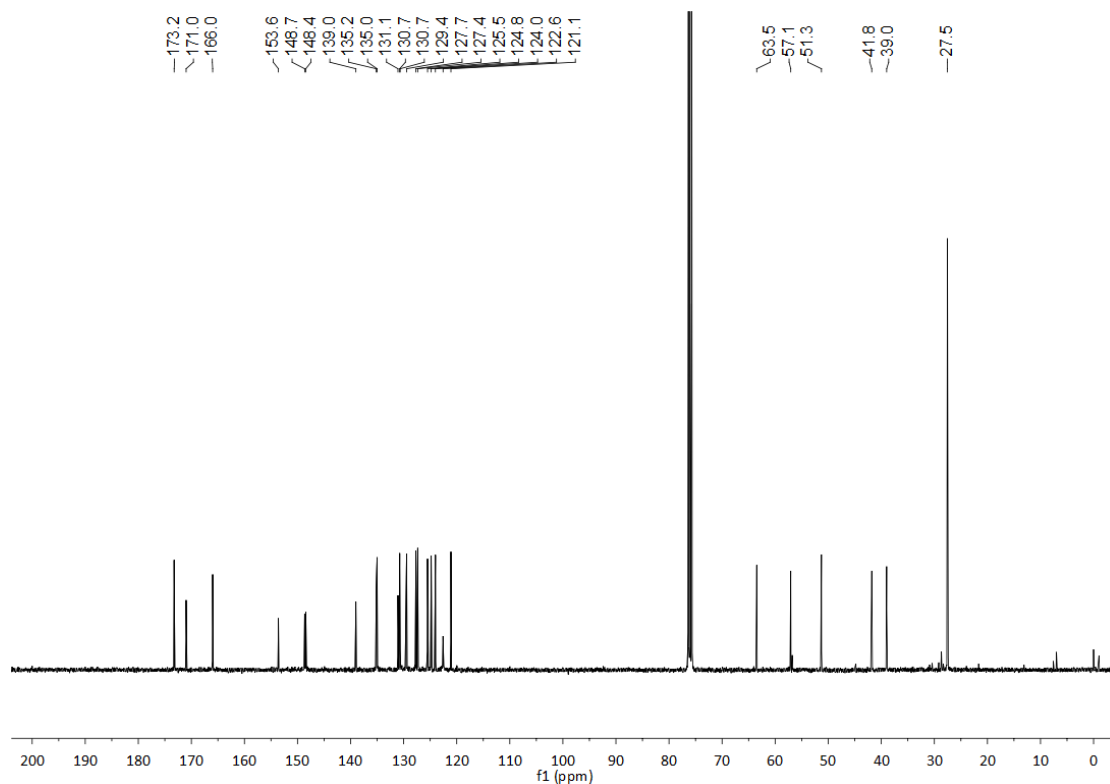

**DEPT**

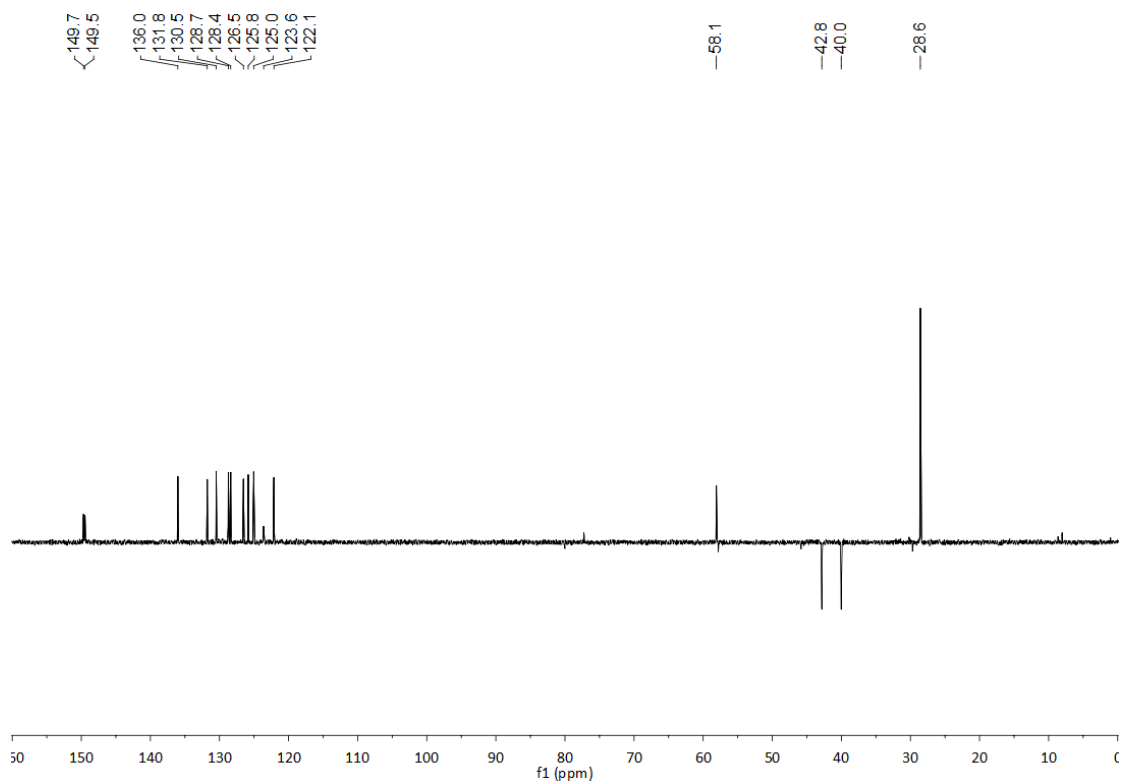

**13** crude  $^1\text{H}$  NMR

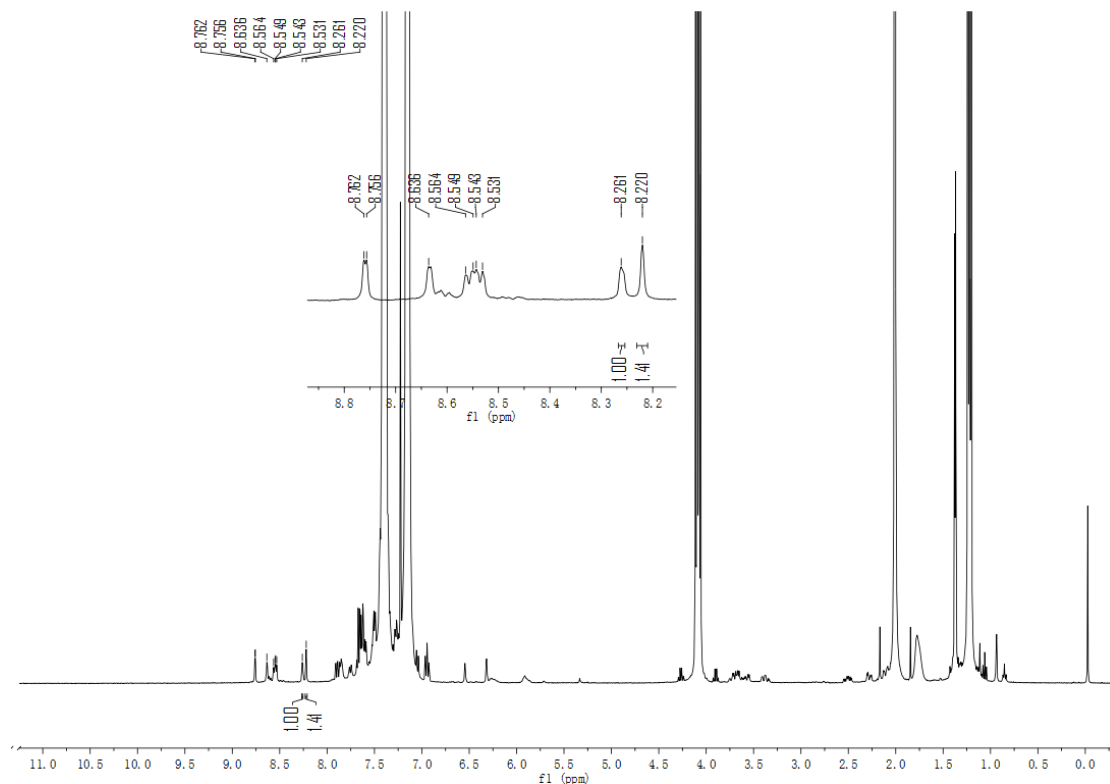

**N-(tert-butyl)-3-methyl-2-(1-oxo-3,4-dihydrospiro[benzo[c]azepine-5,3'-indol]-2(1H)-yl)butanamide (14down)**

$^1\text{H}$  NMR (400 MHz,  $\text{CDCl}_3$ ):

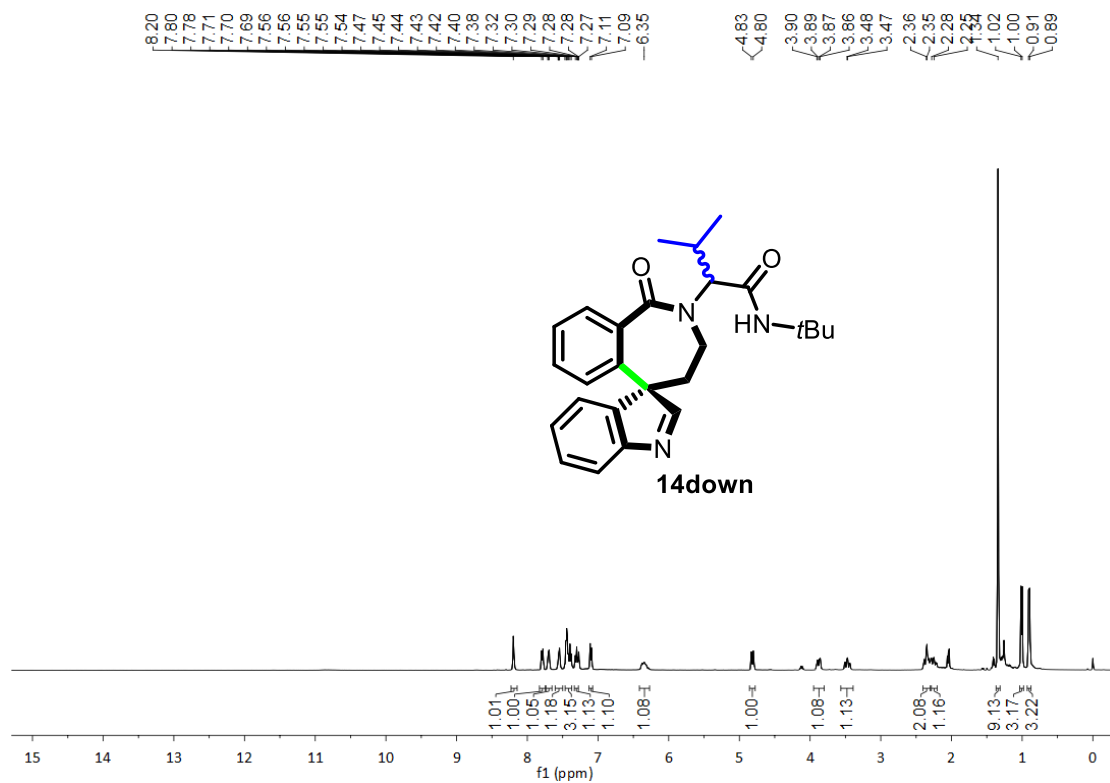

**<sup>13</sup>C NMR (100 MHz, CDCl<sub>3</sub>):**

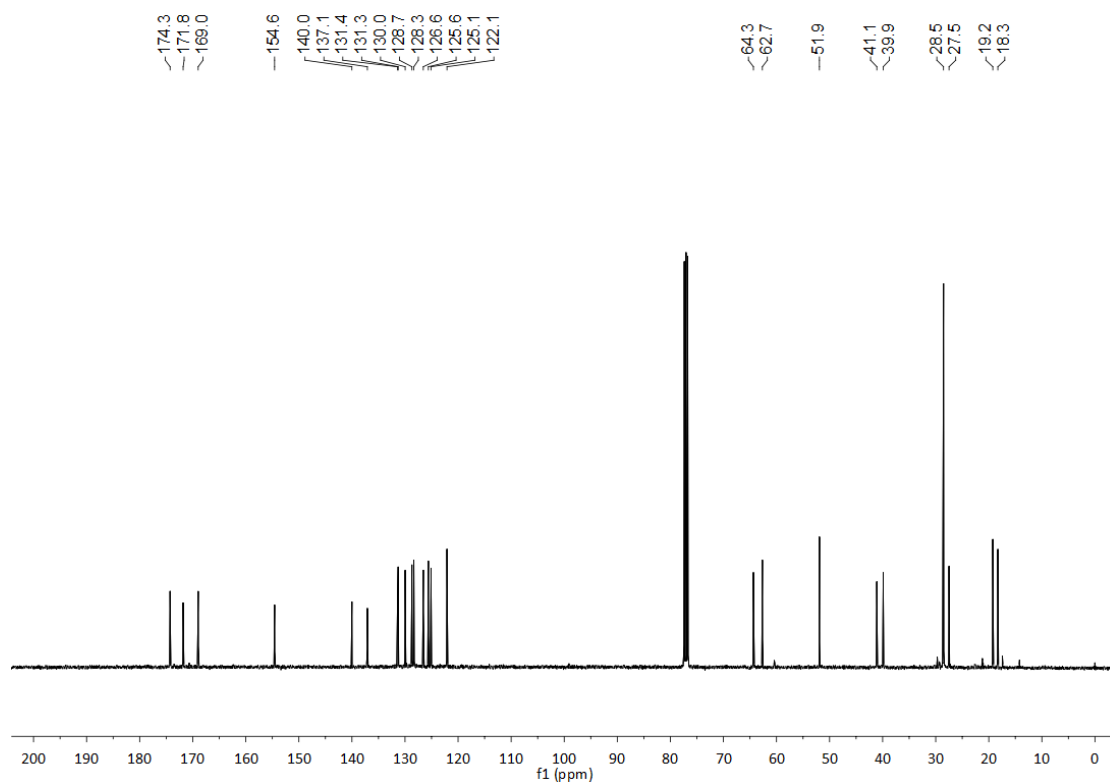

**DEPT**

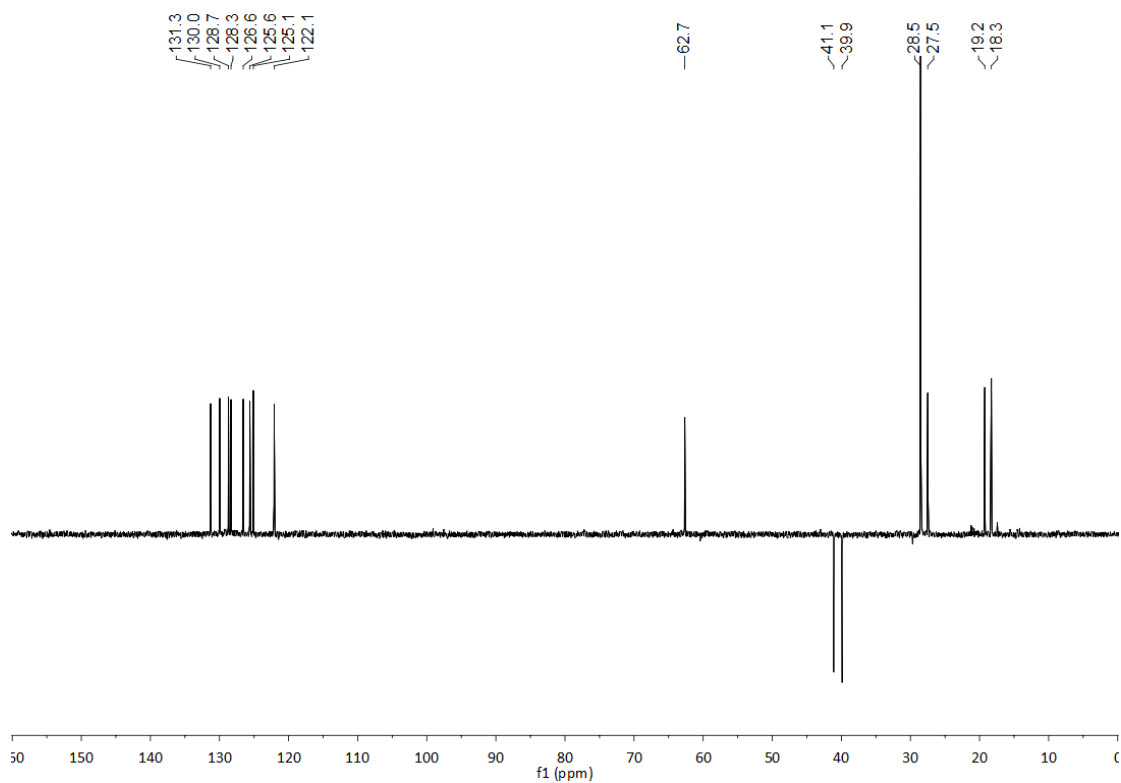

**N-(tert-butyl)-2-(8-methyl-1-oxo-3,4-dihydrospiro[benzo[c]azepine-5,3'-indol]-2(1H)-yl)-2-phenylacetamide (15down)**

**<sup>1</sup>H NMR (400 MHz, CDCl<sub>3</sub>):**

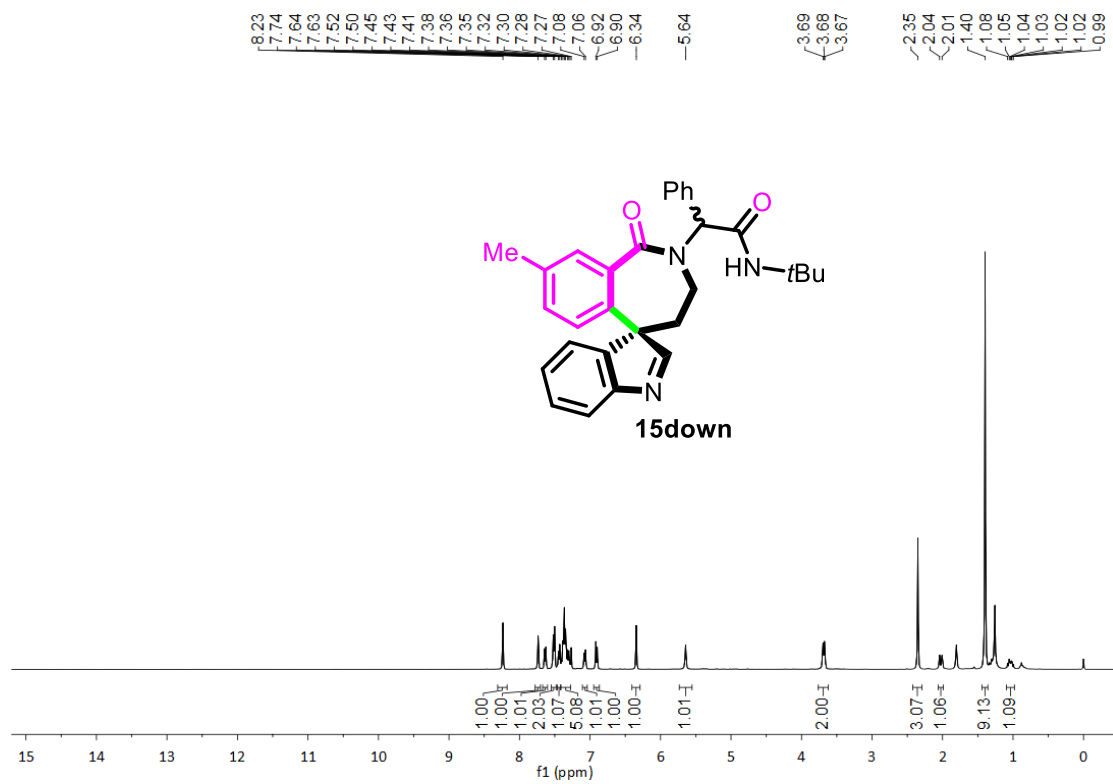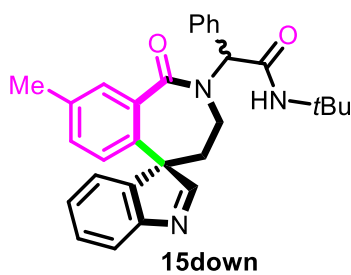

**<sup>13</sup>C NMR (100 MHz, CDCl<sub>3</sub>):**

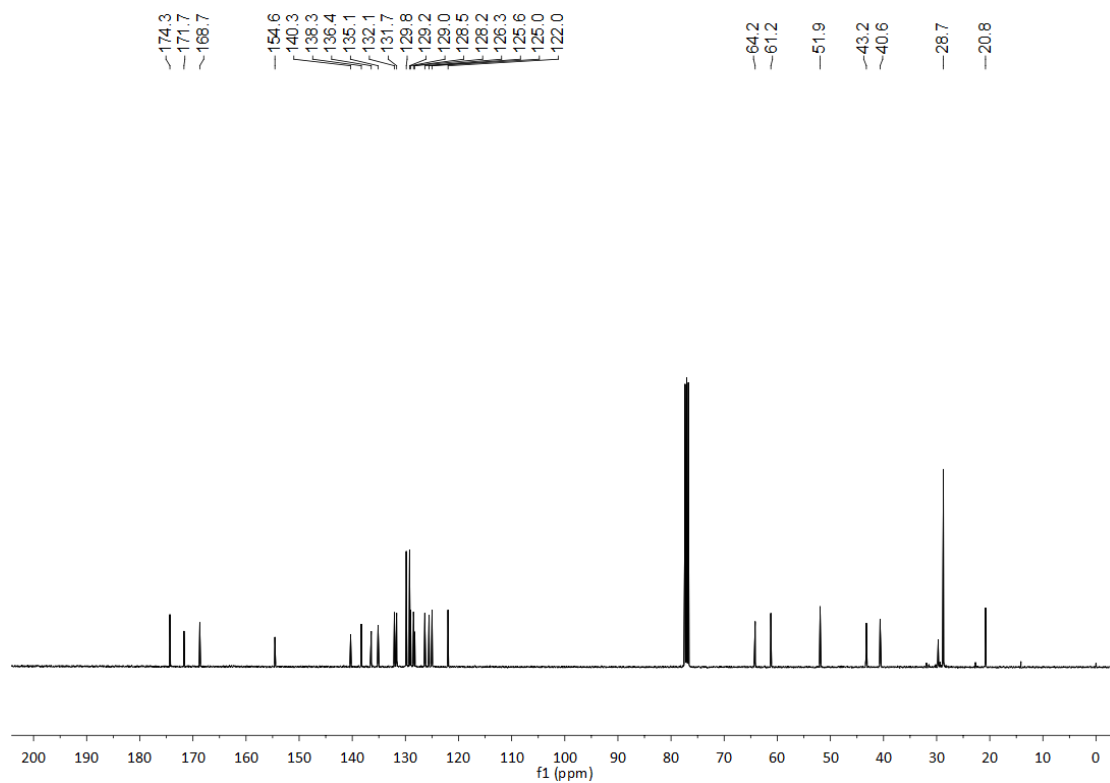

**DEPT**

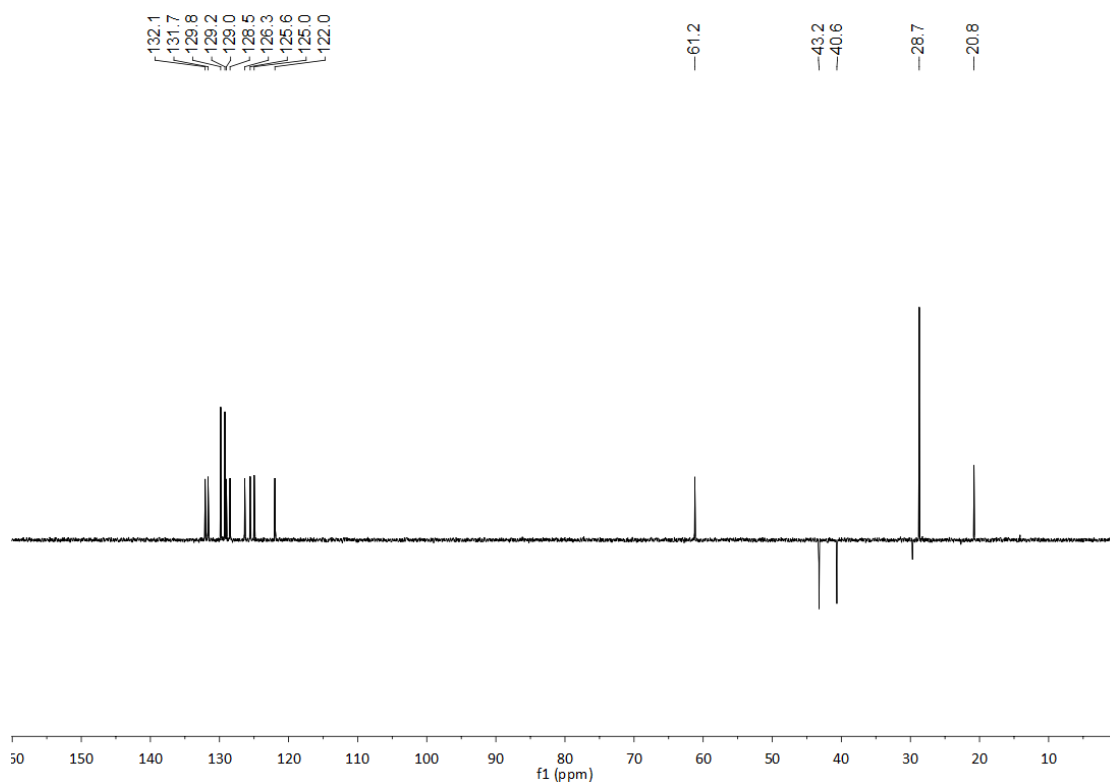

**N-(tert-butyl)-2-(7,8-dimethoxy-1-oxo-3,4-dihydrospiro[benzo[c]azepine-5,3'-indol]-2(1H)-yl)-2-p henylacetamide (16down)**

**<sup>1</sup>H NMR (400 MHz, CDCl<sub>3</sub>):**

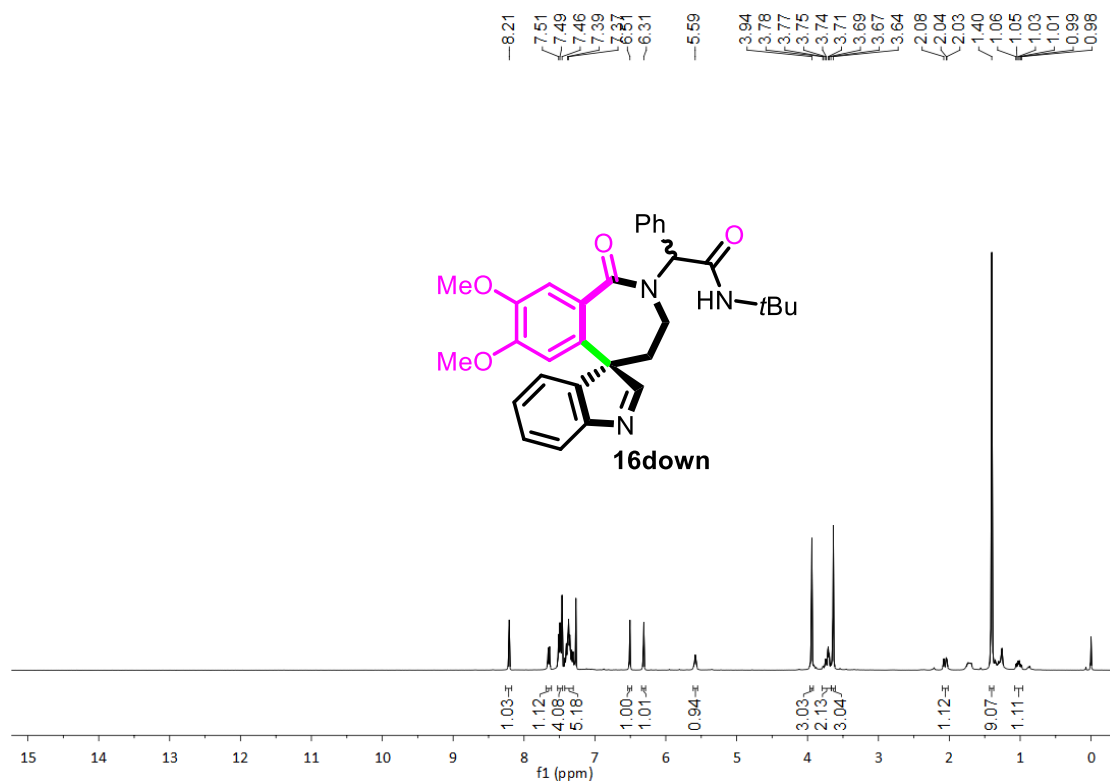

$^{13}\text{C}$  NMR (100 MHz,  $\text{CDCl}_3$ ):

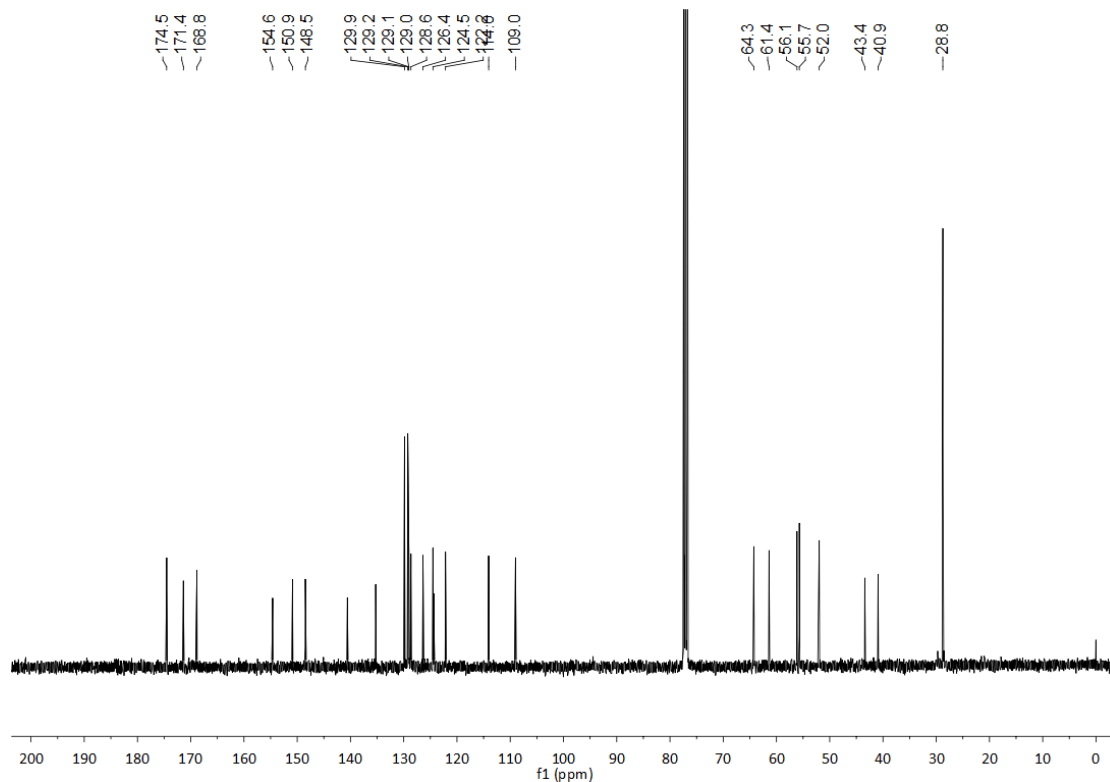

DEPT

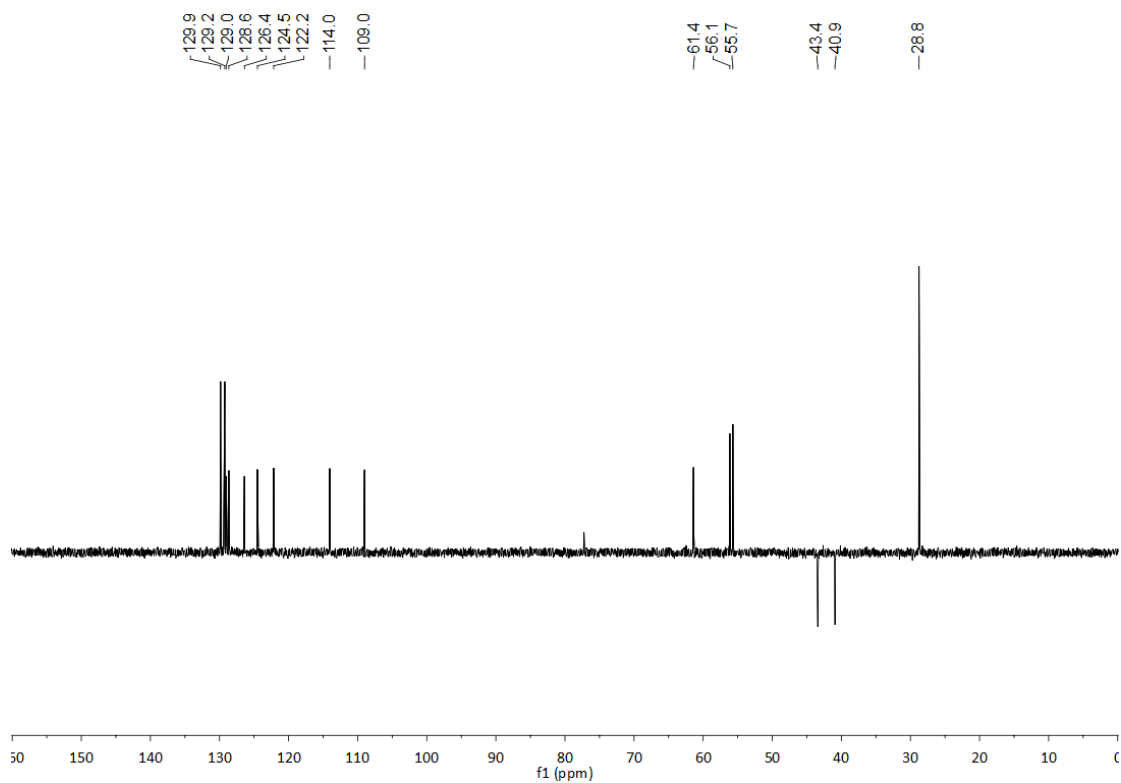

**N-(tert-butyl)-2-(8-fluoro-1-oxo-3,4-dihydrospiro[benzo[c]azepine-5,3'-indol]-2(1H)-yl)-2-phenylacetamide (17down)**

**<sup>1</sup>H NMR (400 MHz, CDCl<sub>3</sub>):**

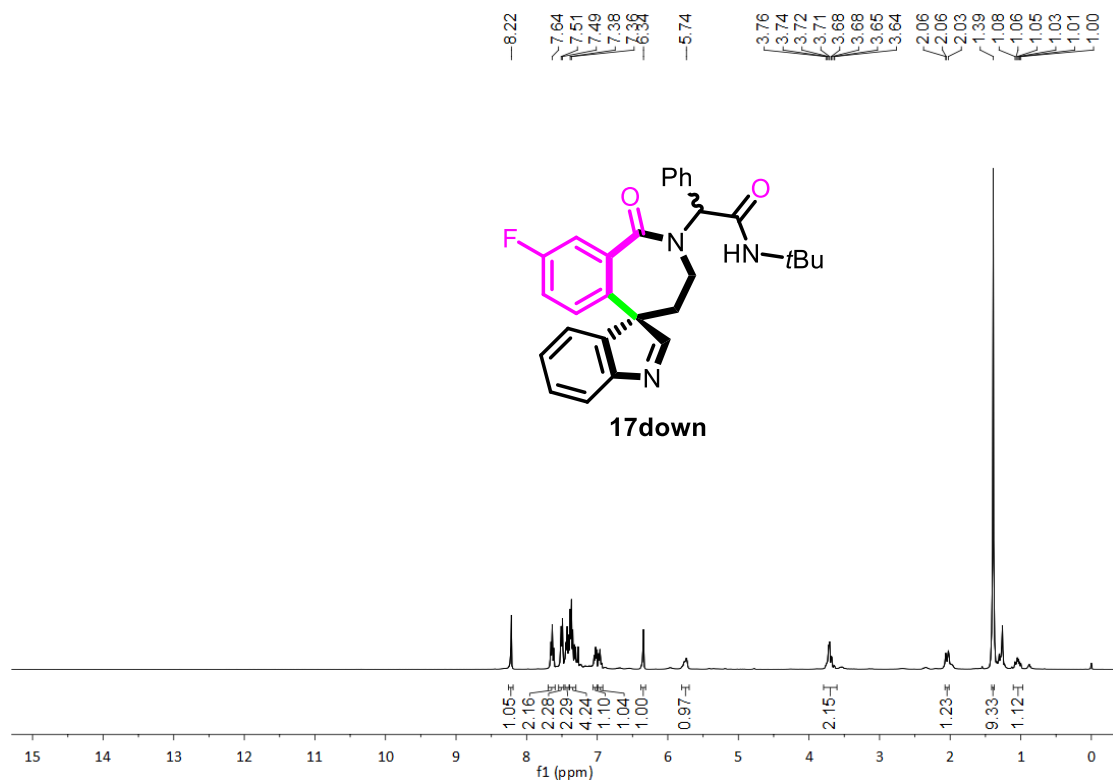

**<sup>13</sup>C NMR (100 MHz, CDCl<sub>3</sub>):**

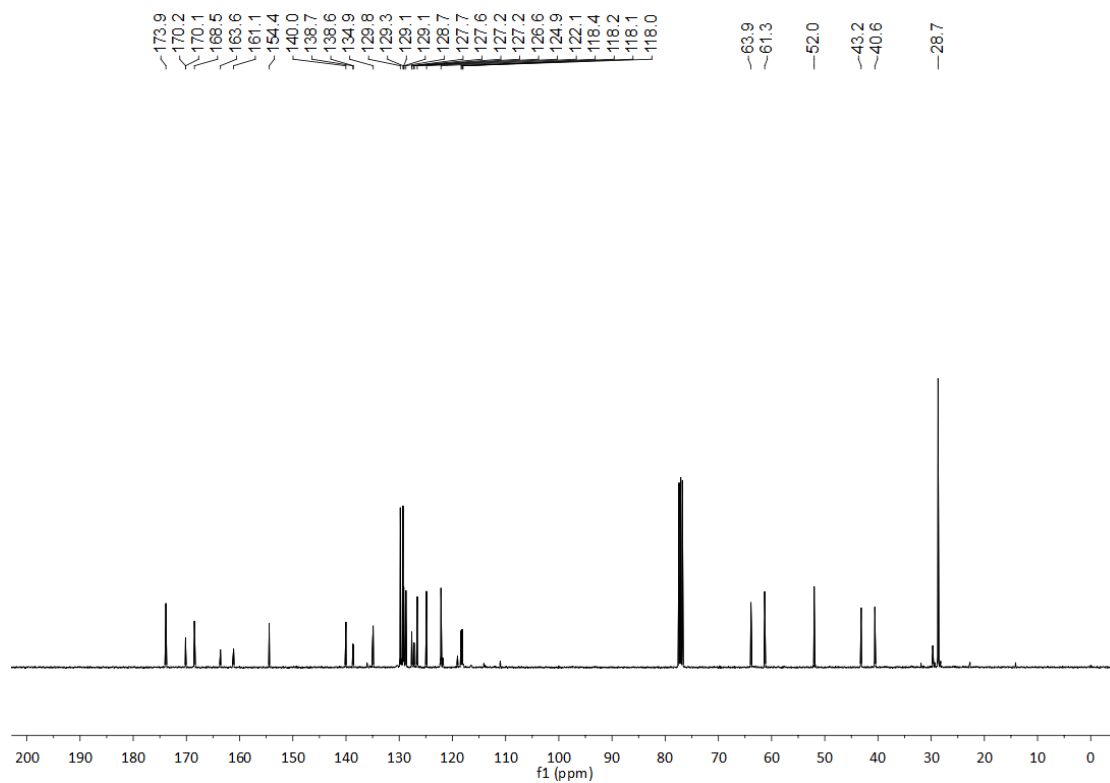

**DEPT**

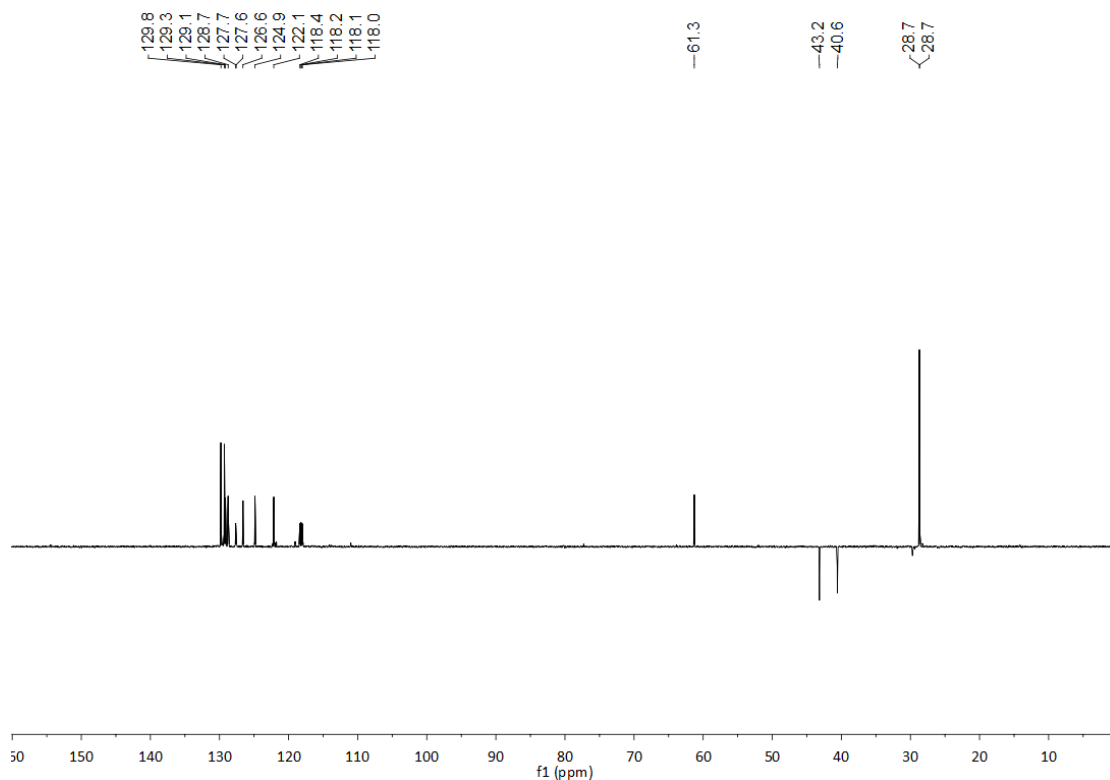

**<sup>19</sup>F NMR (376MHz, CDCl<sub>3</sub>)**



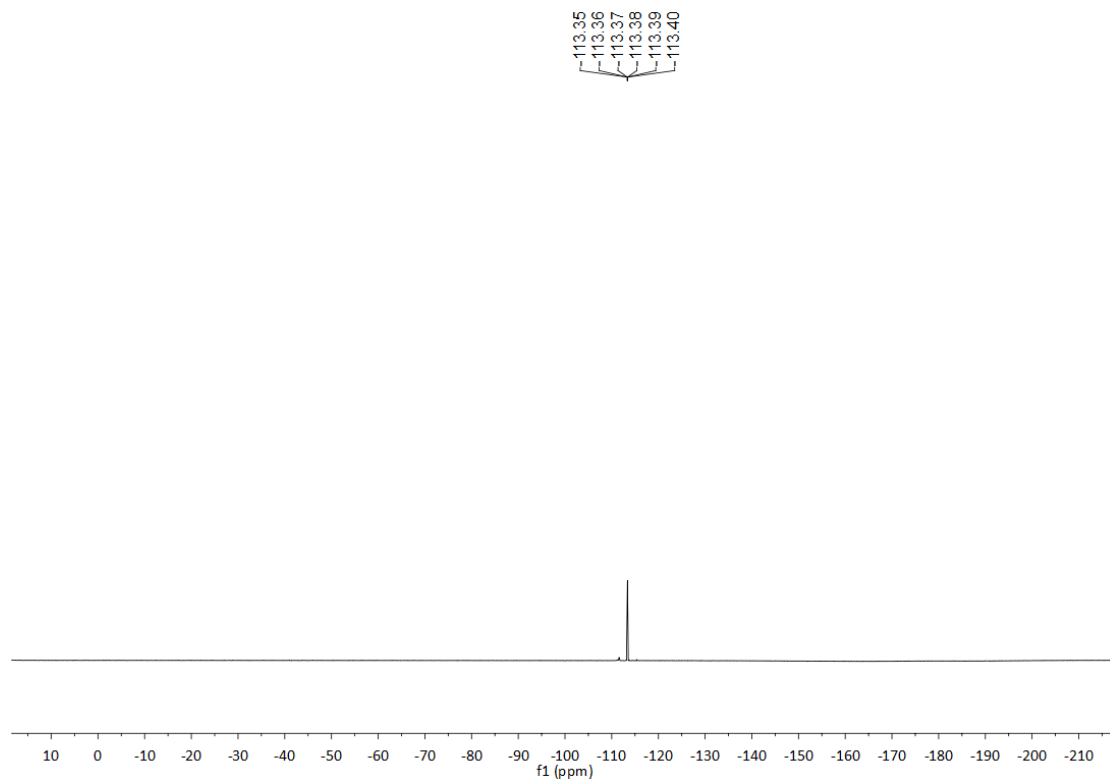

**N-(tert-butyl)-2-(7-chloro-1-oxo-3,4-dihydrospiro[benzo[c]azepine-5,3'-indol]-2(1H)-yl)-2-phenylacetamide (18down)**

**<sup>1</sup>H NMR (400 MHz, CDCl<sub>3</sub>):**

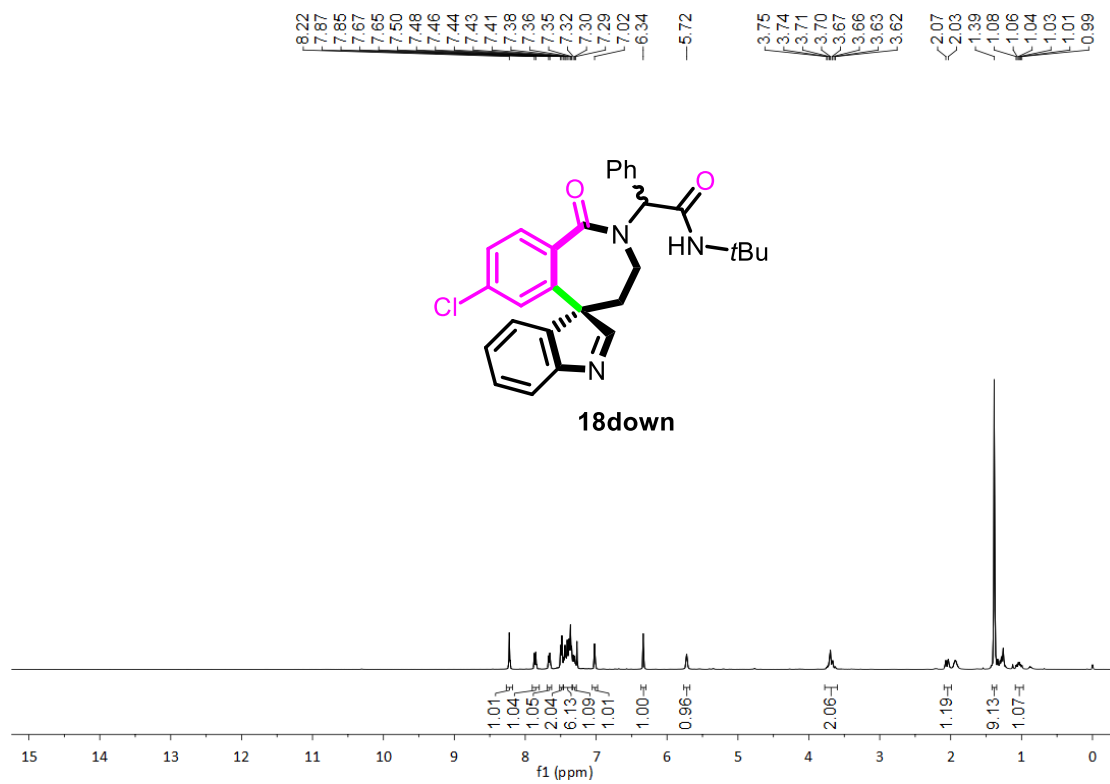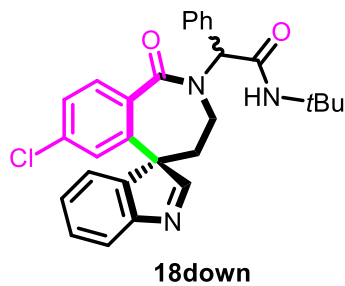

**<sup>13</sup>C NMR (100 MHz, CDCl<sub>3</sub>):**

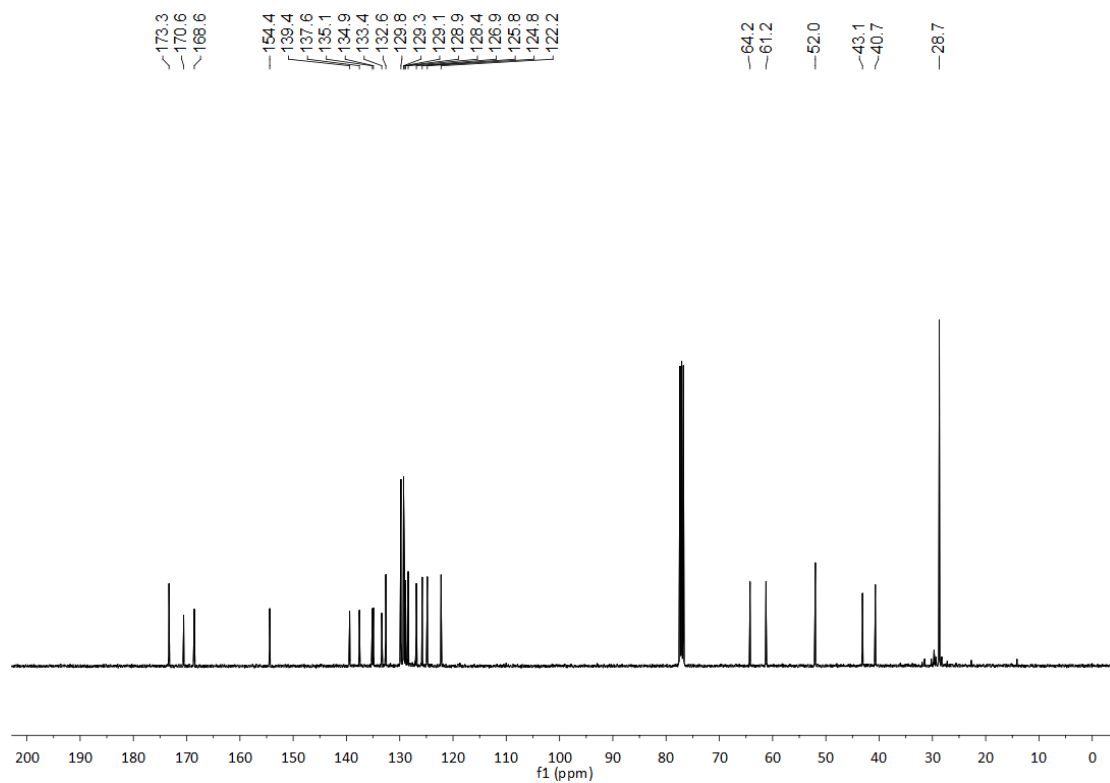

**DEPT**

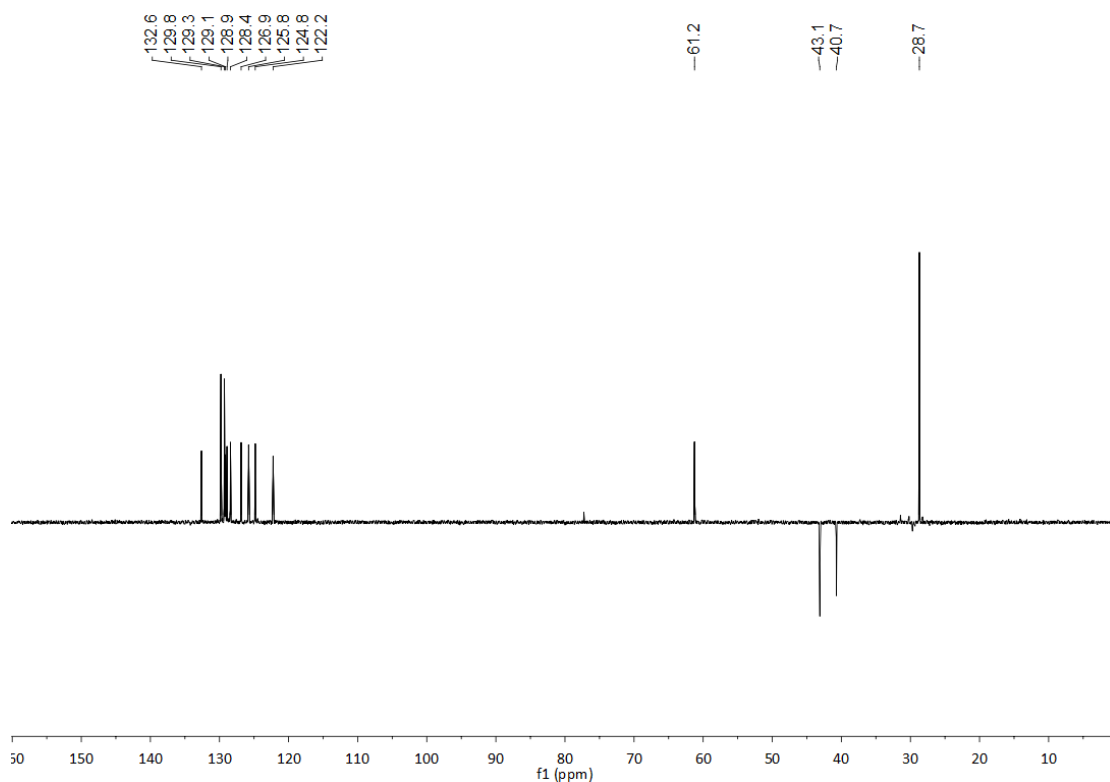

**N-(tert-butyl)-2-(7-chloro-1-oxo-3,4-dihydrospiro[benzo[c]azepine-5,3'-indol]-2(1H)-yl)-2-phenyl acetamide (18up)**

**<sup>1</sup>H NMR (400 MHz, CDCl<sub>3</sub>):**

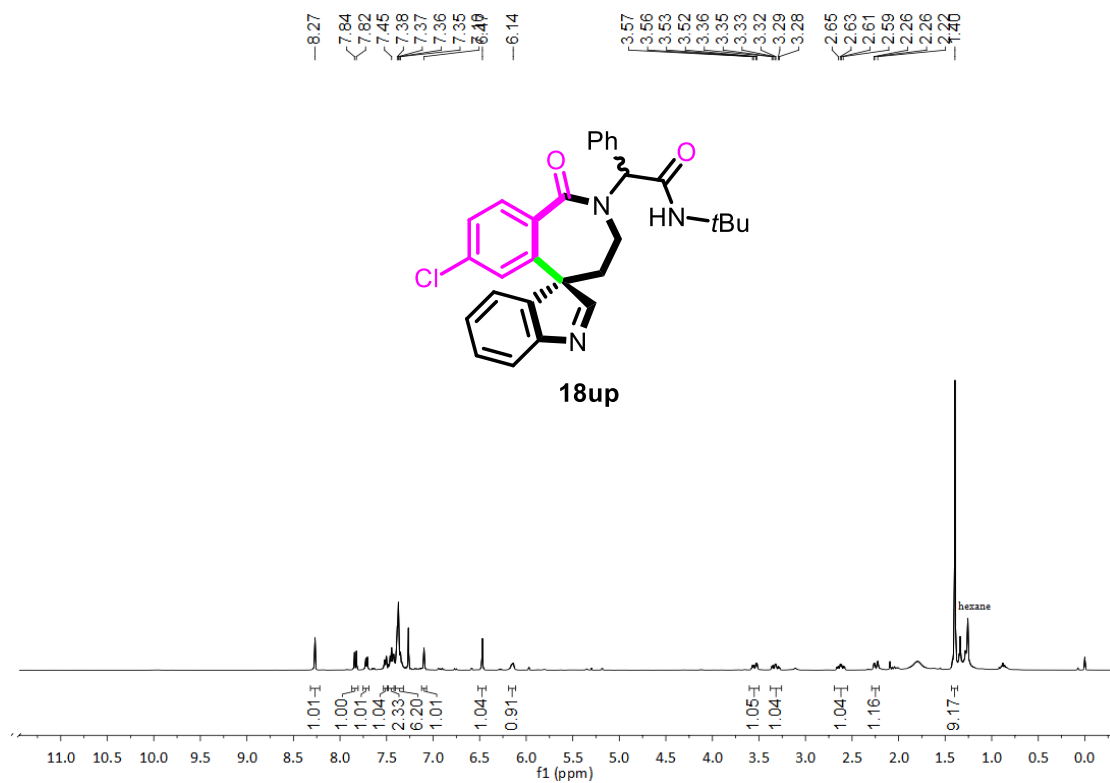

**<sup>13</sup>C NMR (100 MHz, CDCl<sub>3</sub>):**

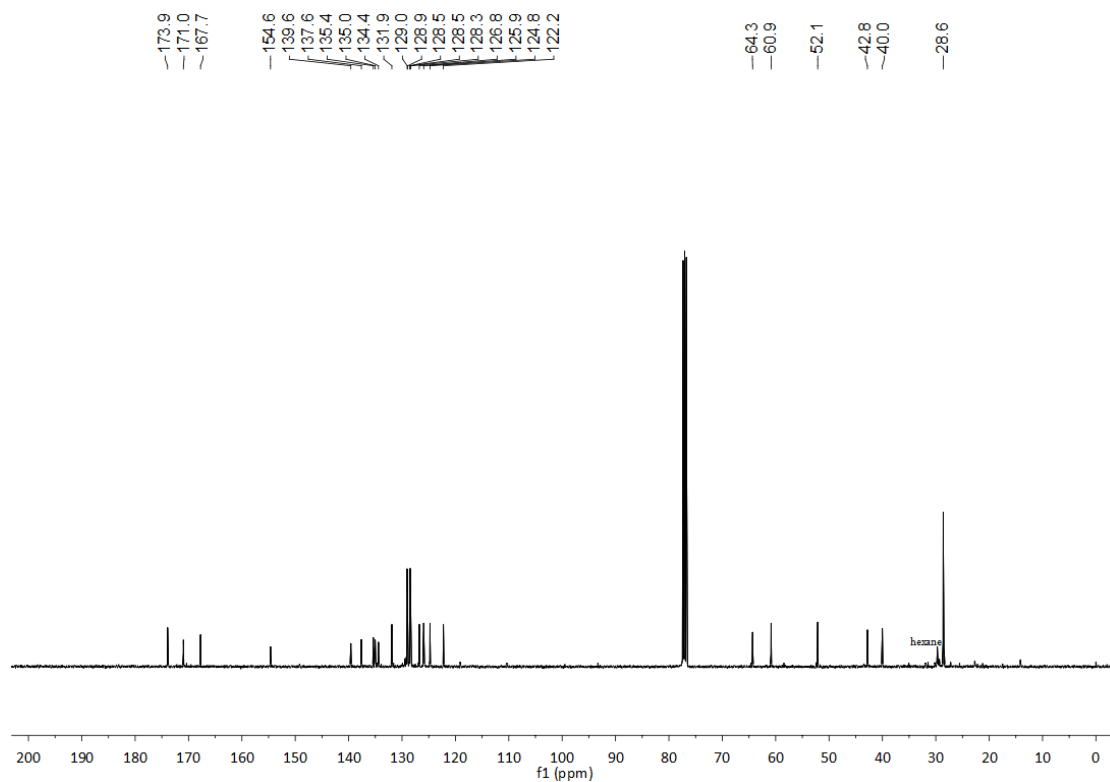

**DEPT**

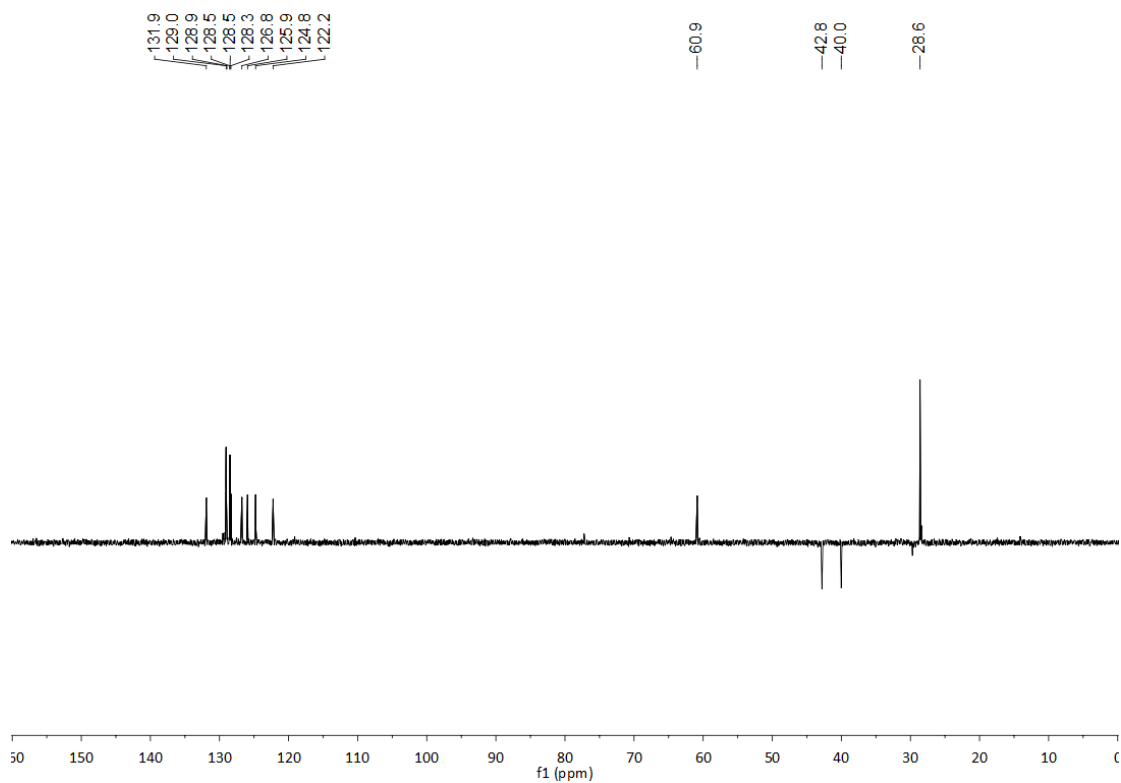

**18** crude  $^1\text{H}$  NMR

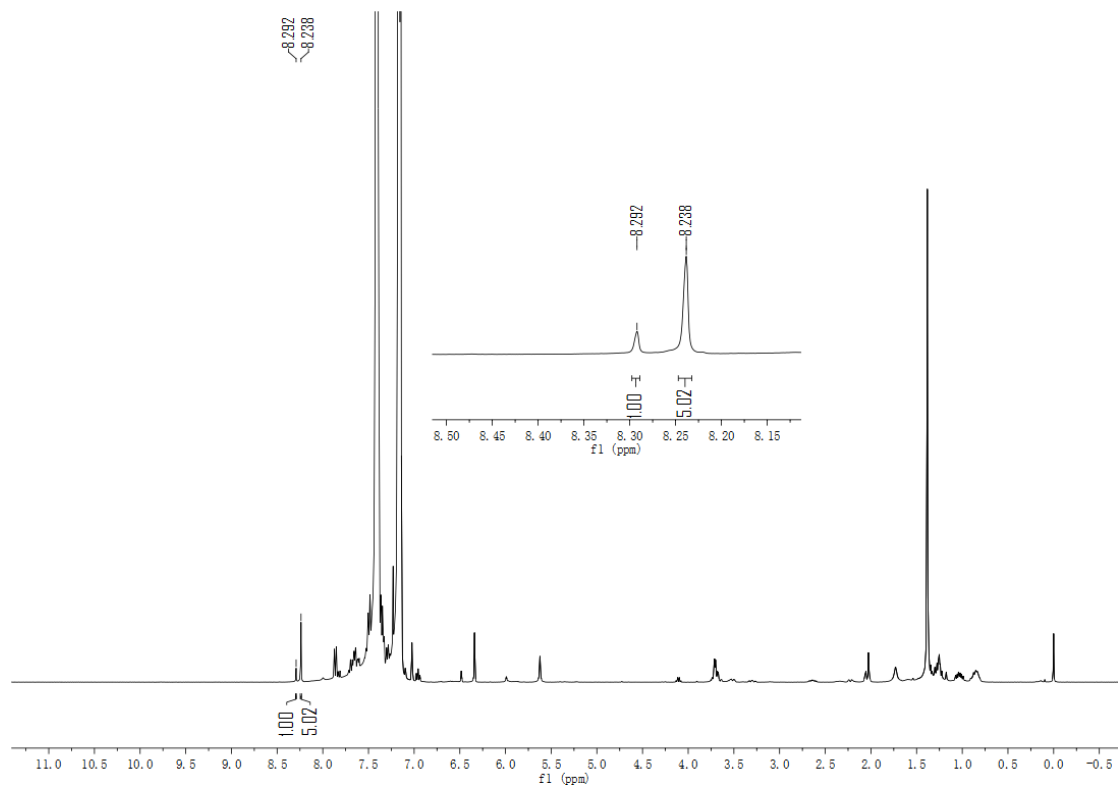

**2-(8-bromo-1-oxo-3,4-dihydrospiro[benzo[c]azepine-5,3'-indol]-2(1H)-yl)-N-(tert-butyl)-2-phenyl acetamide (19down)**

$^1\text{H}$  NMR (400 MHz,  $\text{CDCl}_3$ ):

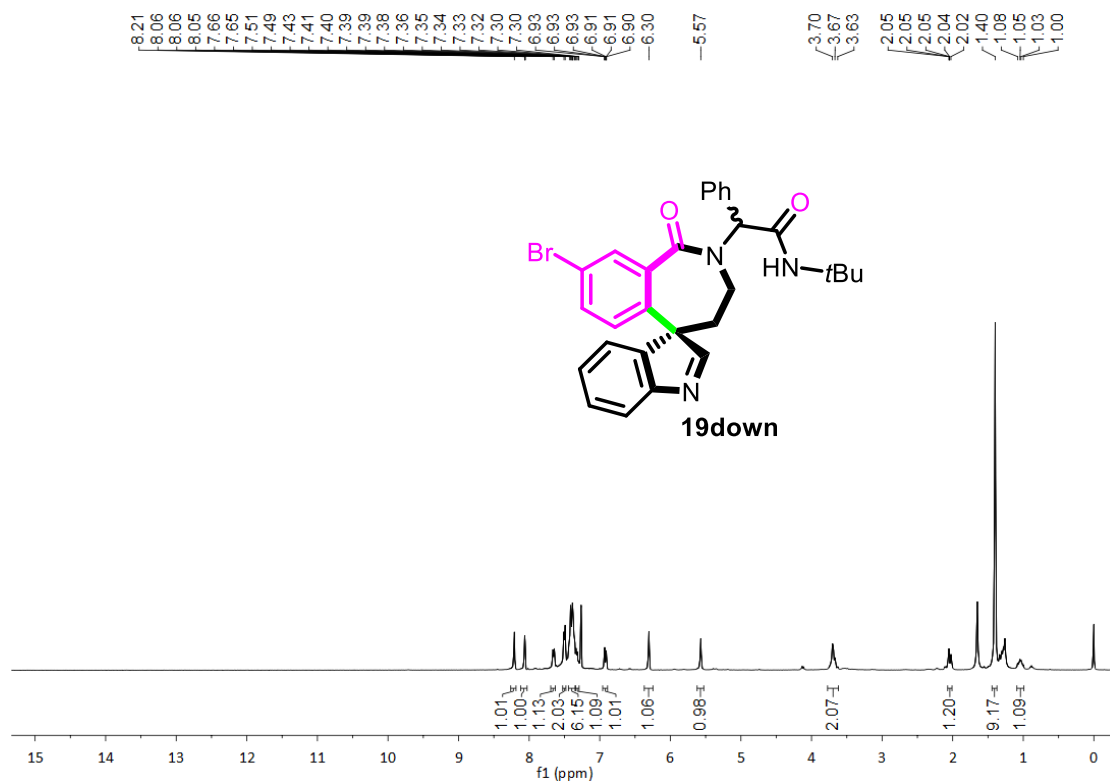

**<sup>13</sup>C NMR (100 MHz, CDCl<sub>3</sub>):**

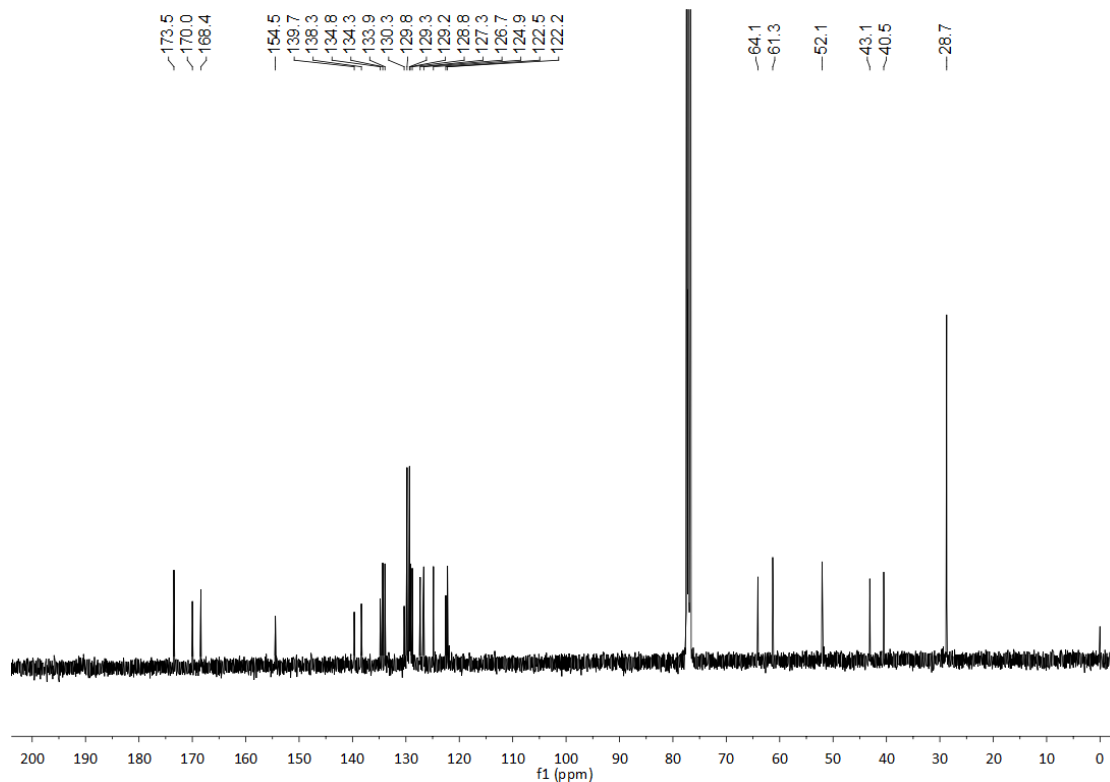

**DEPT**

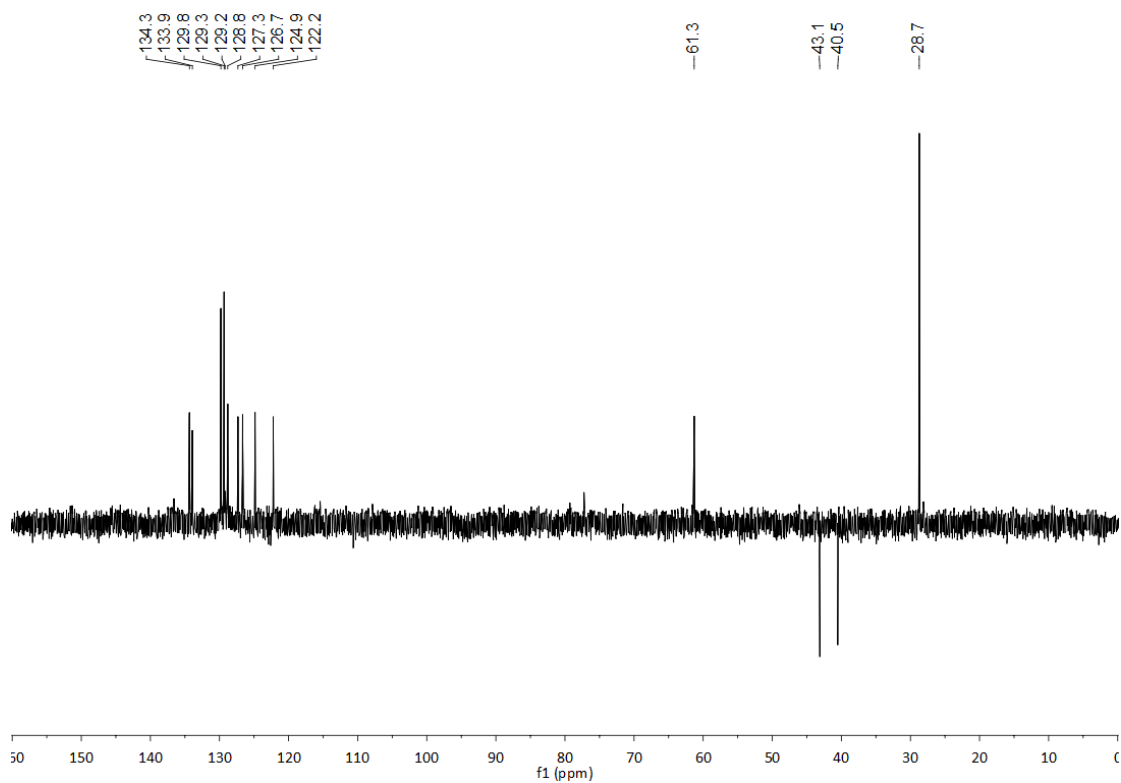

**2-(8-bromo-1-oxo-3,4-dihydrospiro[benzo[c]azepine-5,3'-indol]-2(1H)-yl)-N-(tert-butyl)-2-phenyl acetamide (19up)**

**<sup>1</sup>H NMR (400 MHz, CDCl<sub>3</sub>):**

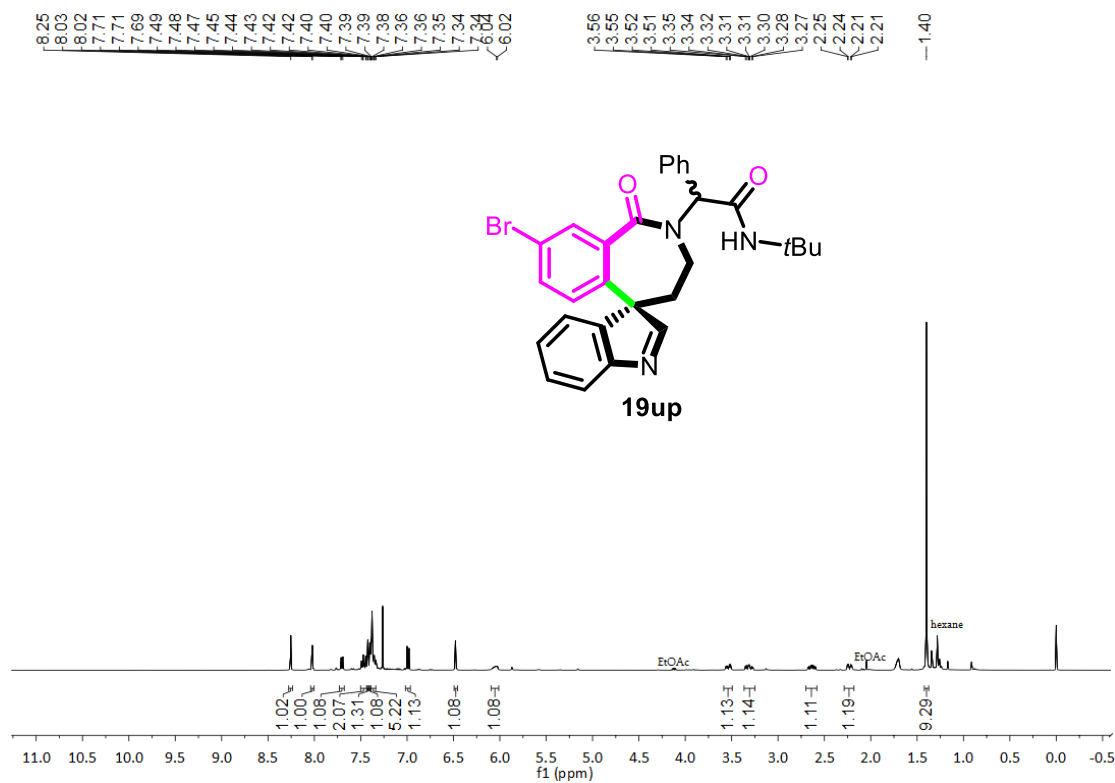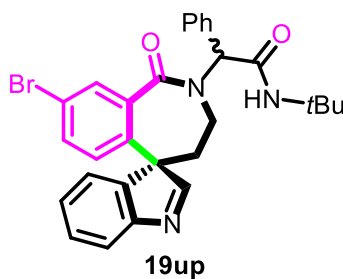

**<sup>13</sup>C NMR (100 MHz, CDCl<sub>3</sub>):**

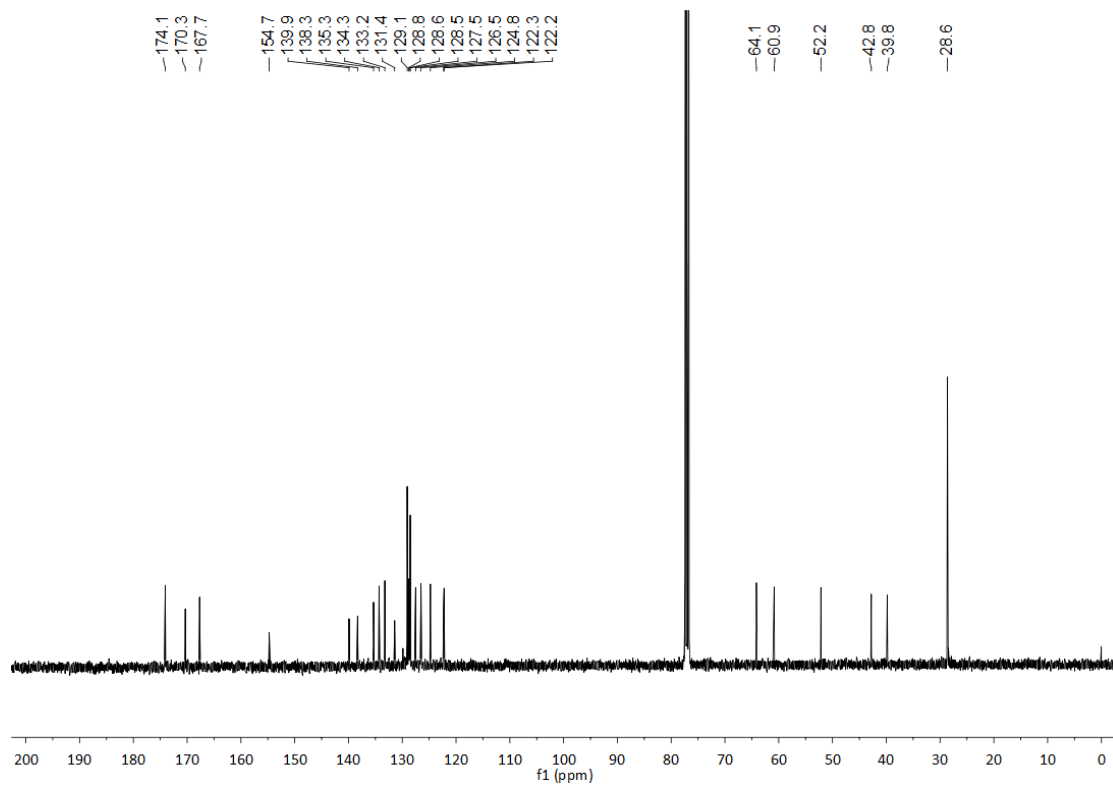

**DEPT**

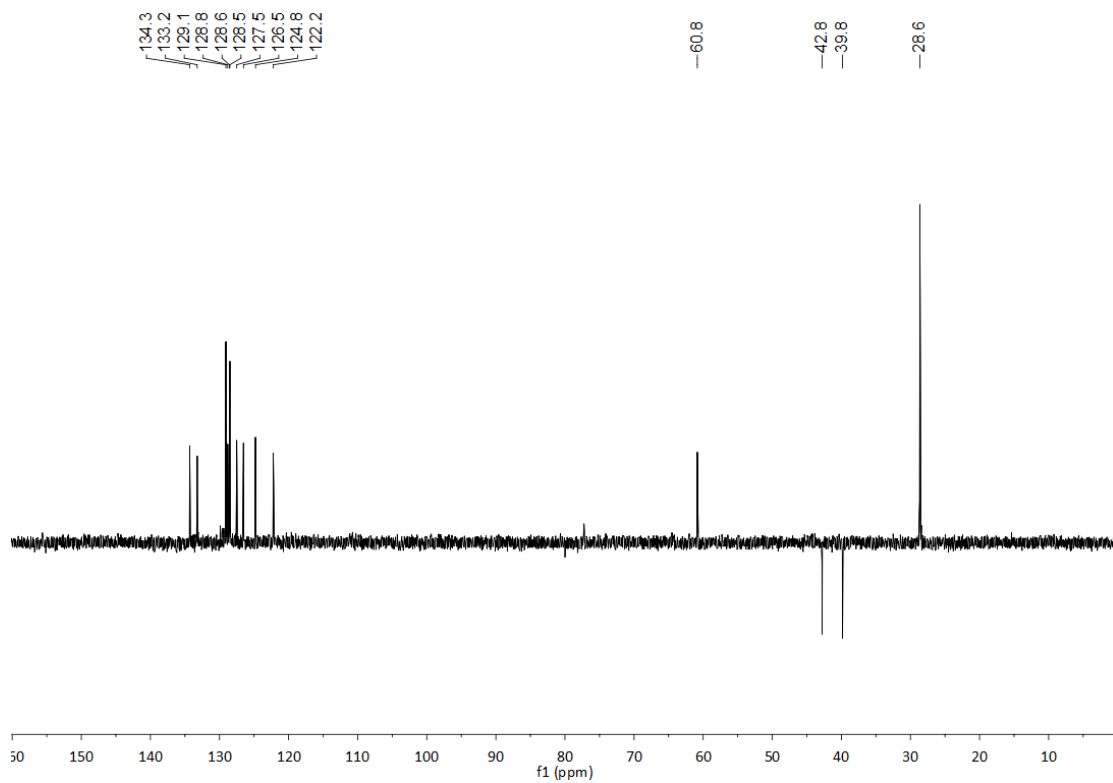

**19 crude <sup>1</sup>H NMR**

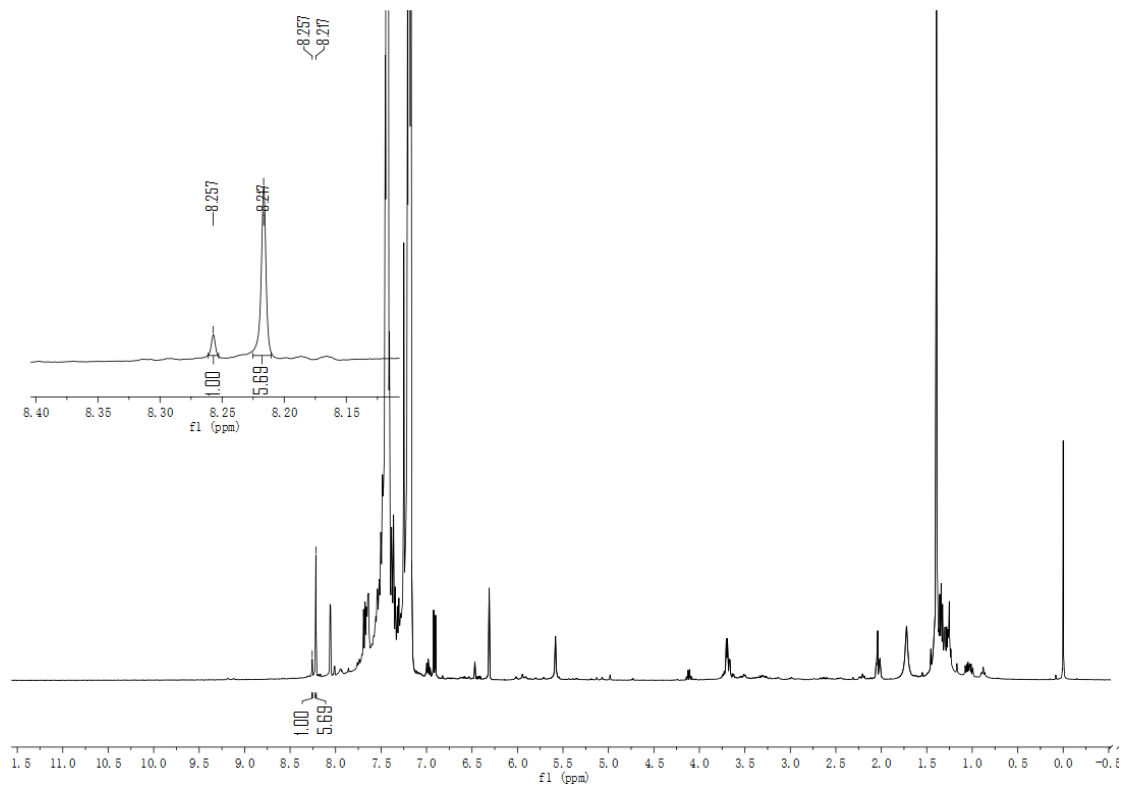

**N-(tert-butyl)-2-(7,8-difluoro-1-oxo-3,4-dihydrospiro[benzo[c]azepine-5,3'-indol]-2(1H)-yl)-2-phenylacetamide (20down)**

**<sup>1</sup>H NMR (400 MHz, CDCl<sub>3</sub>):**

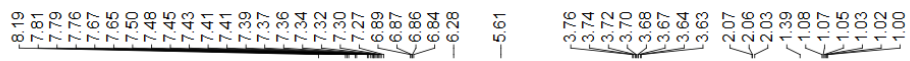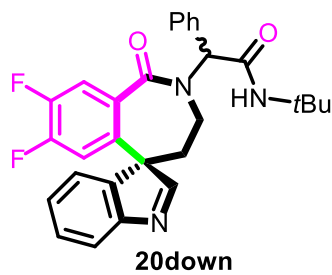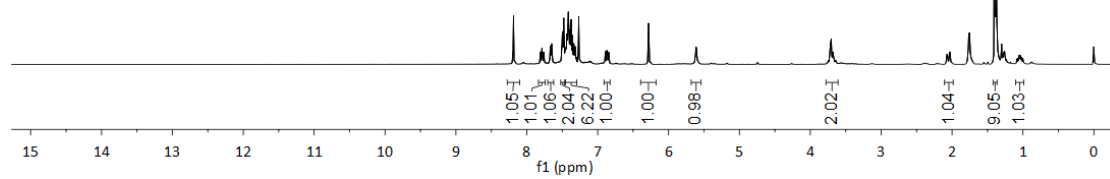

**<sup>13</sup>C NMR (100 MHz, CDCl<sub>3</sub>):**



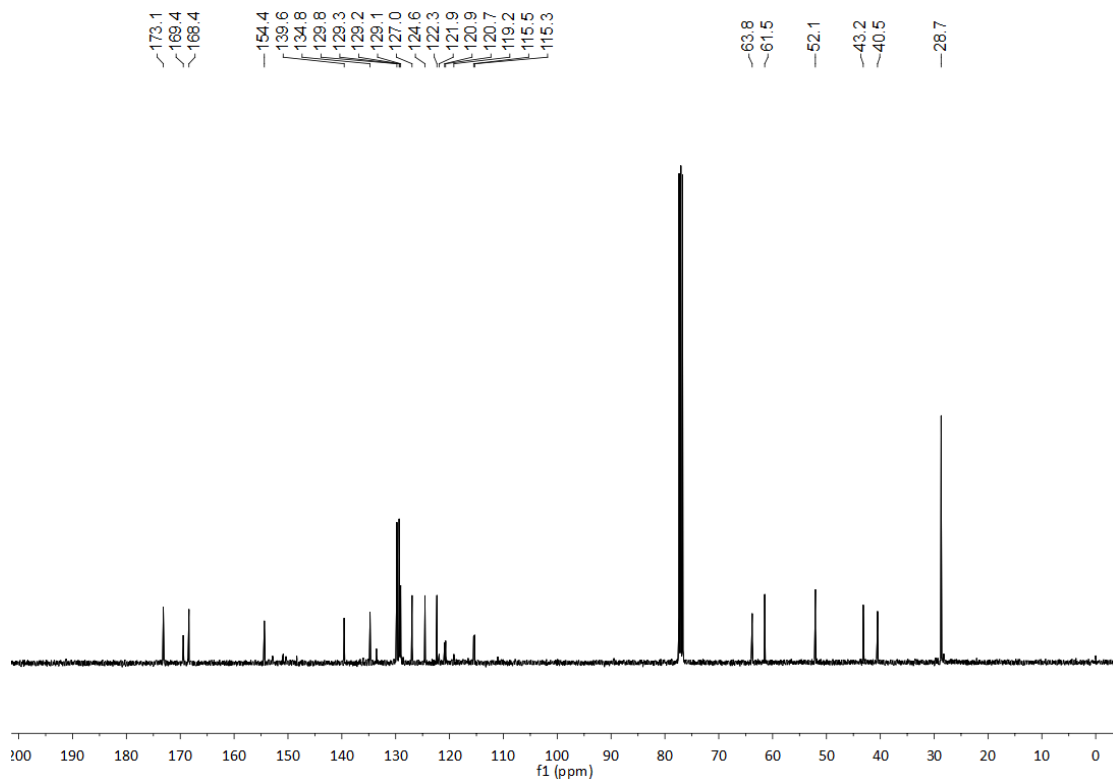

**DEPT**

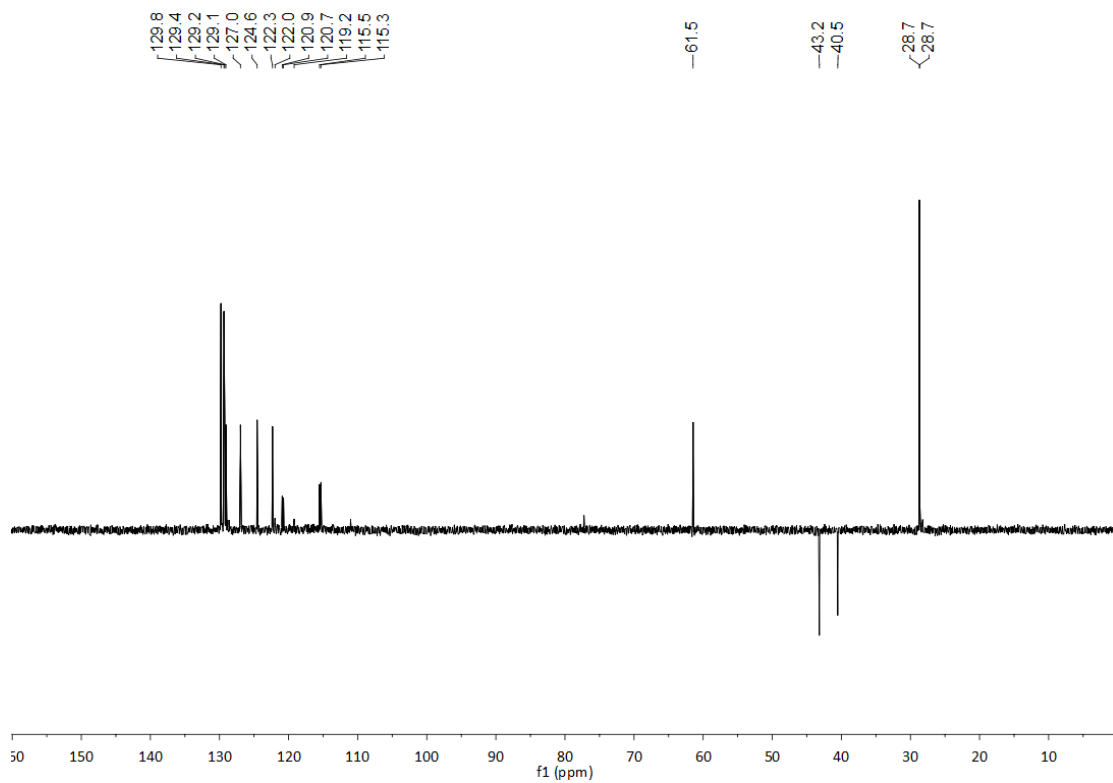

**<sup>19</sup>F NMR (376 MHz, CDCl<sub>3</sub>)**

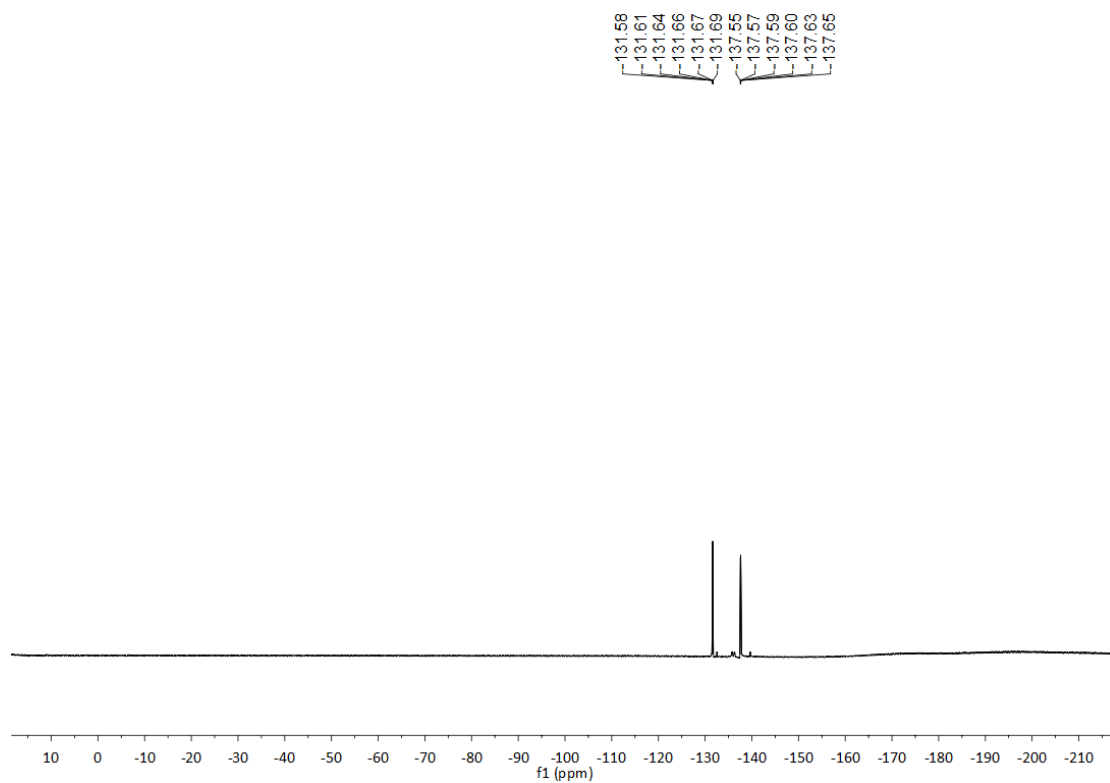

**N-(tert-butyl)-2-(1-oxo-7-(trifluoromethyl)-3,4-dihydrospiro[benzo[c]azepine-5,3'-indol]-2(1H)-yl)-2-phenylacetamide (21down)**

**<sup>1</sup>H NMR (400 MHz, CDCl<sub>3</sub>):**

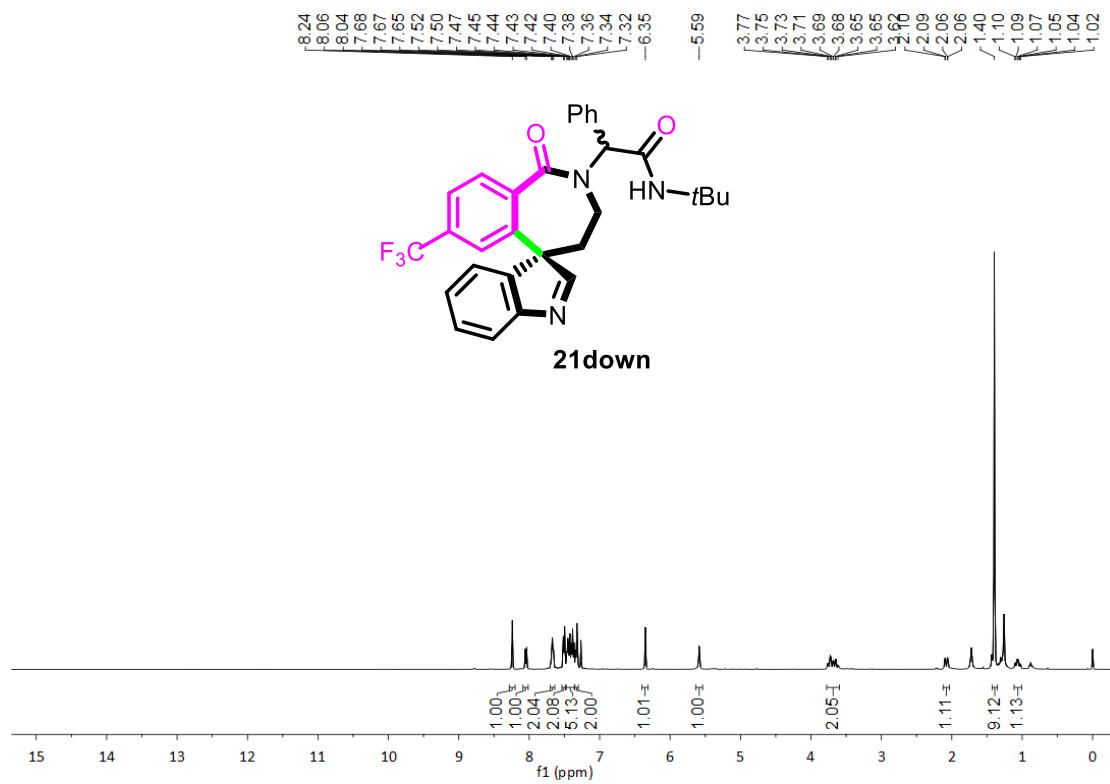

**<sup>13</sup>C NMR (100 MHz, CDCl<sub>3</sub>):**

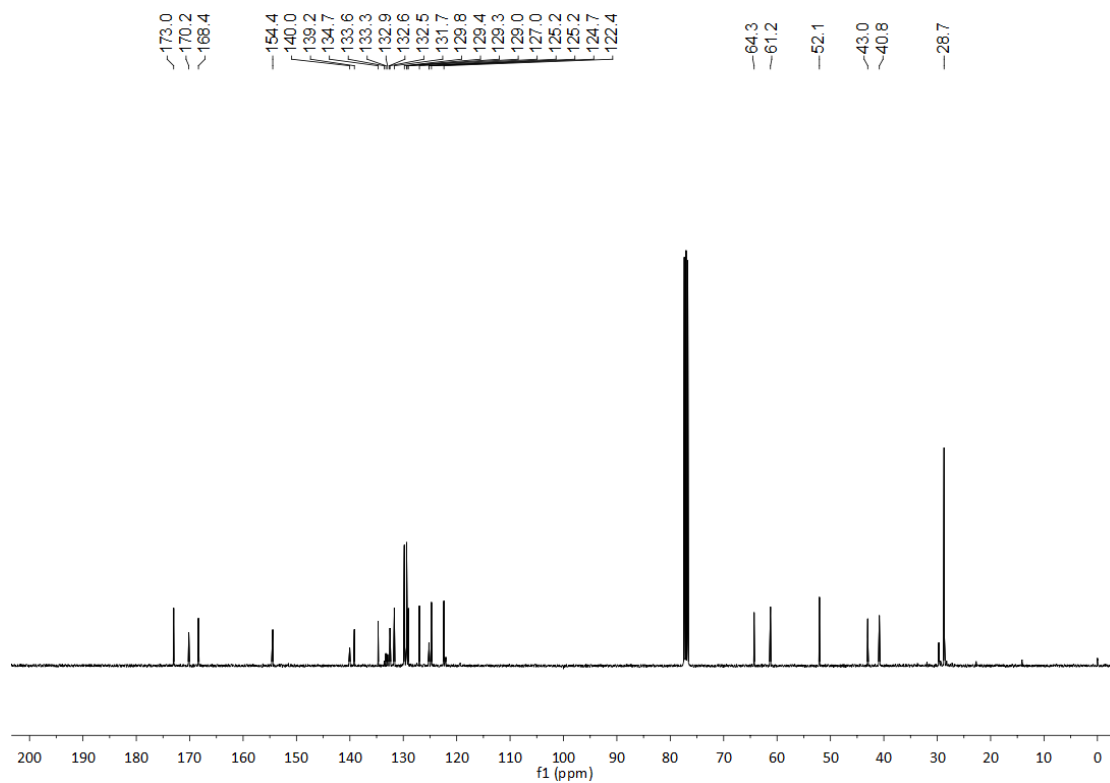

**DEPT**

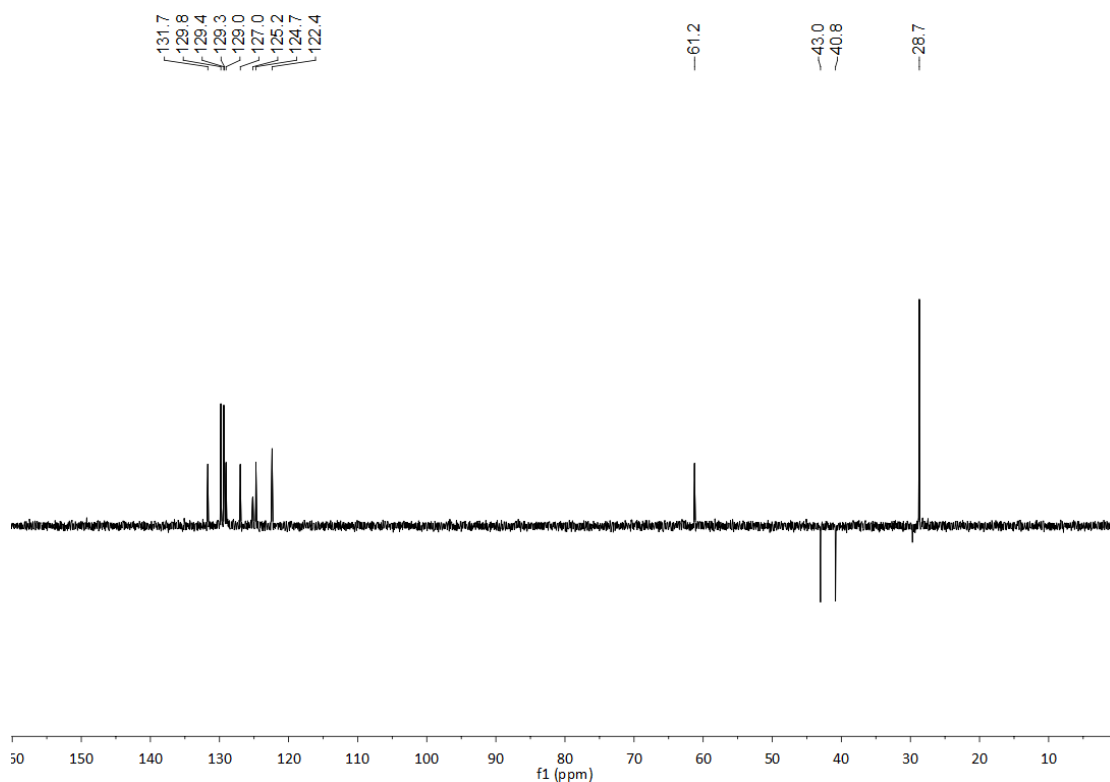

**<sup>19</sup>F NMR (376 MHz, CDCl<sub>3</sub>)**

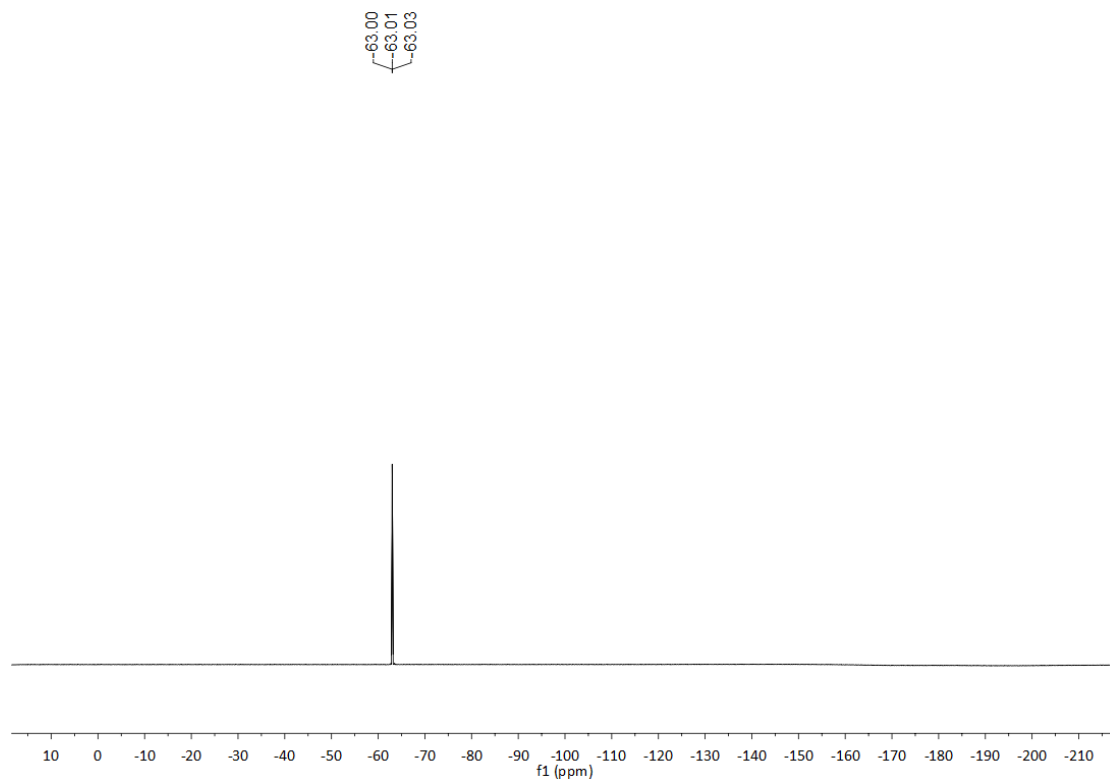

**N-(tert-butyl)-2-(8-nitro-1-oxo-3,4-dihydrospiro[benzo[c]azepine-5,3'-indol]-2(1H)-yl)-2-phenylacetamide (22down)**

**<sup>1</sup>H NMR (400 MHz, CDCl<sub>3</sub>):**

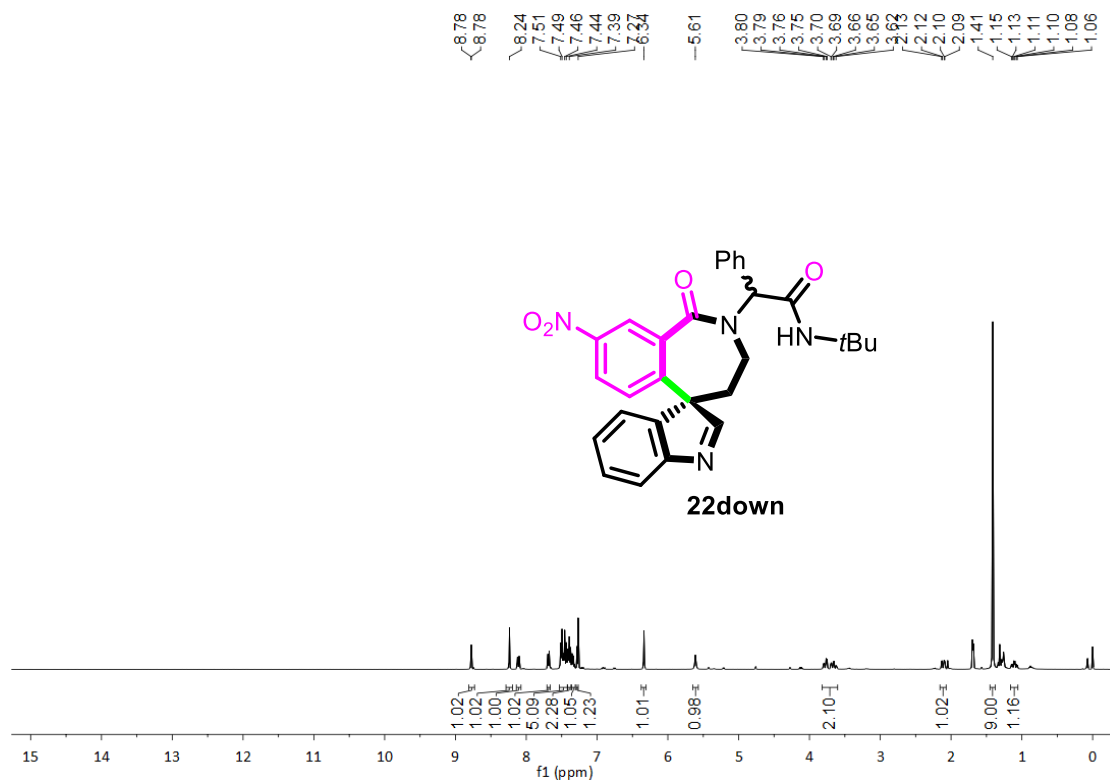

**<sup>13</sup>C NMR (100 MHz, CDCl<sub>3</sub>):**

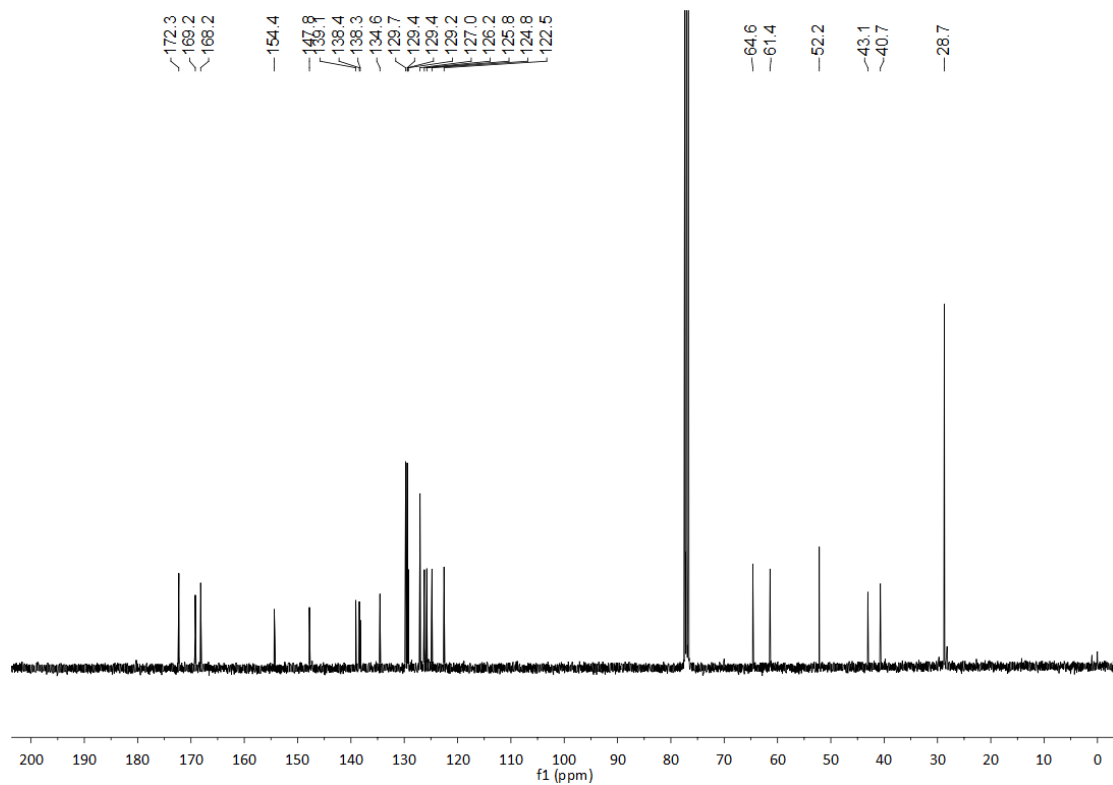

**DEPT**

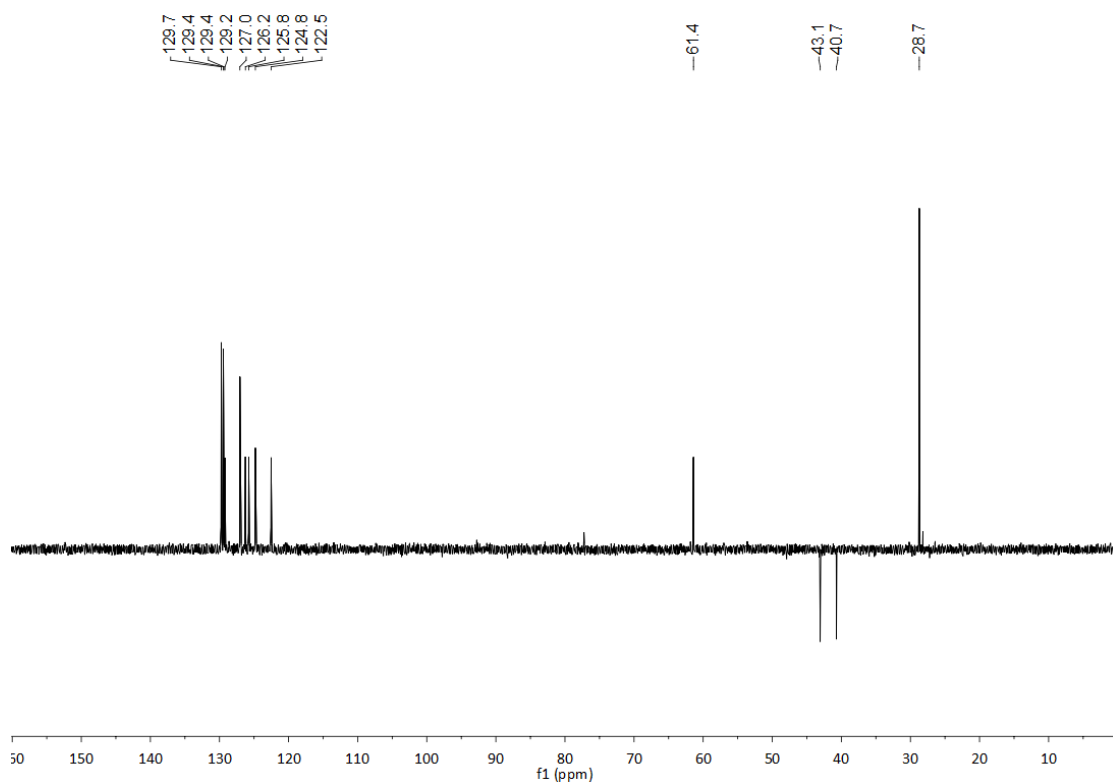

**N-(tert-butyl)-2-(8-nitro-1-oxo-3,4-dihydrospiro[benzo[c]azepine-5,3'-indol]-2(1H)-yl)-2-phenylacetamide (22up)**

**<sup>1</sup>H NMR (400 MHz, CDCl<sub>3</sub>):**

8.74  
8.30  
8.13  
8.11  
8.10  
7.75  
7.73  
7.53  
7.51  
7.49  
7.47  
7.46  
7.45  
7.43  
7.40  
7.39  
7.37  
7.35  
7.33  
6.53  
-6.13  
3.59  
3.57  
3.55  
3.54  
3.30  
3.28  
3.27  
3.24  
2.79  
2.77  
2.76  
2.74  
2.32  
2.31  
2.28  
1.41

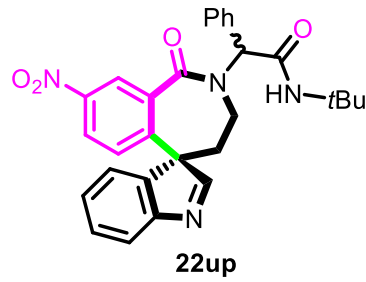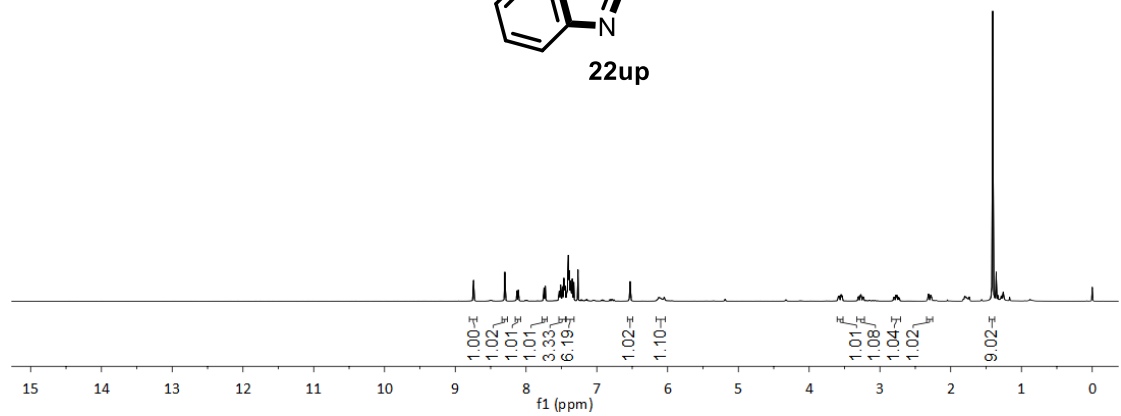

**<sup>13</sup>C NMR (100 MHz, CDCl<sub>3</sub>):**

173.0  
169.5  
167.5  
154.7  
147.5  
139.3  
138.2  
135.1  
129.2  
128.8  
128.6  
127.2  
126.9  
125.7  
125.6  
124.7  
122.5  
64.7  
61.1  
52.2  
42.7  
40.1  
28.6

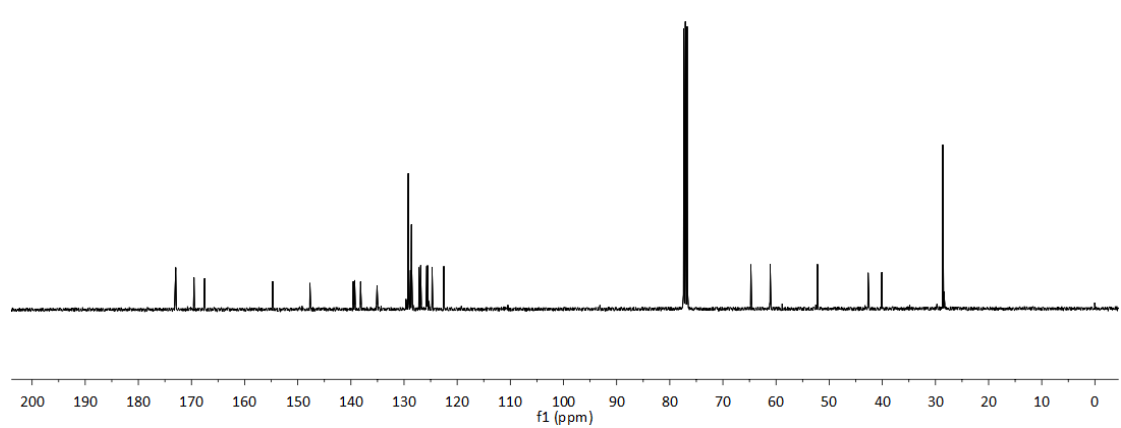

**DEPT**

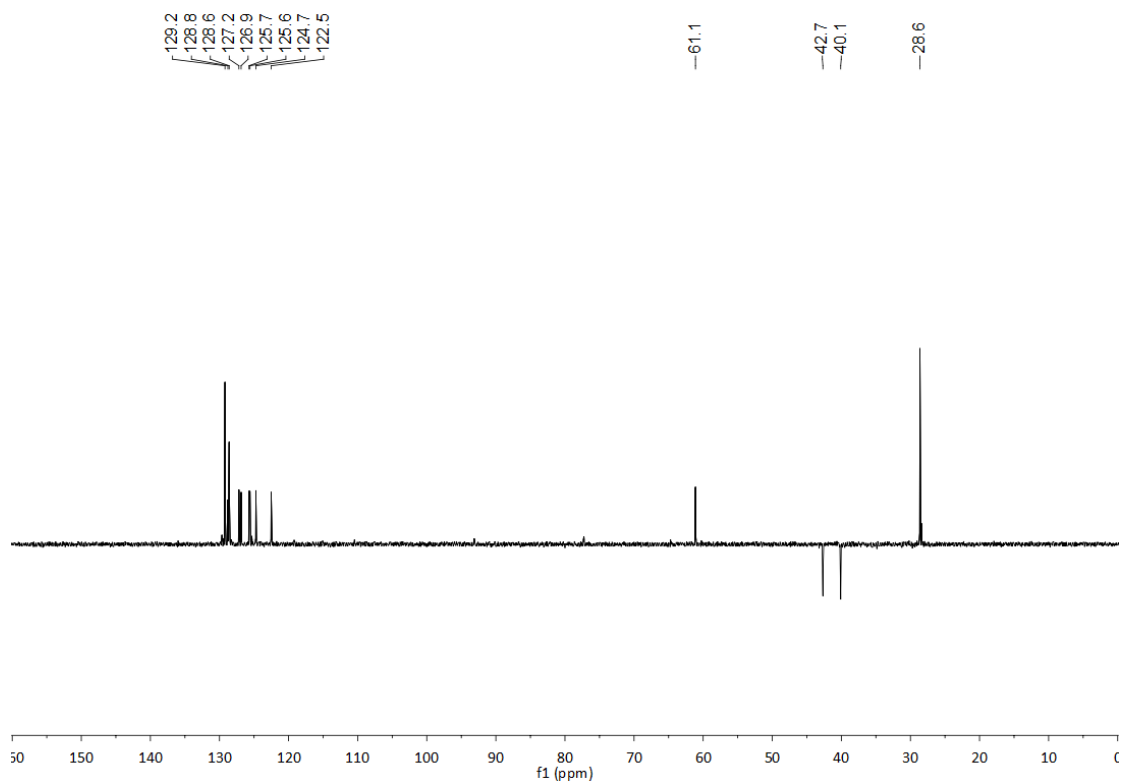

22 crude  $^1\text{H}$  NMR

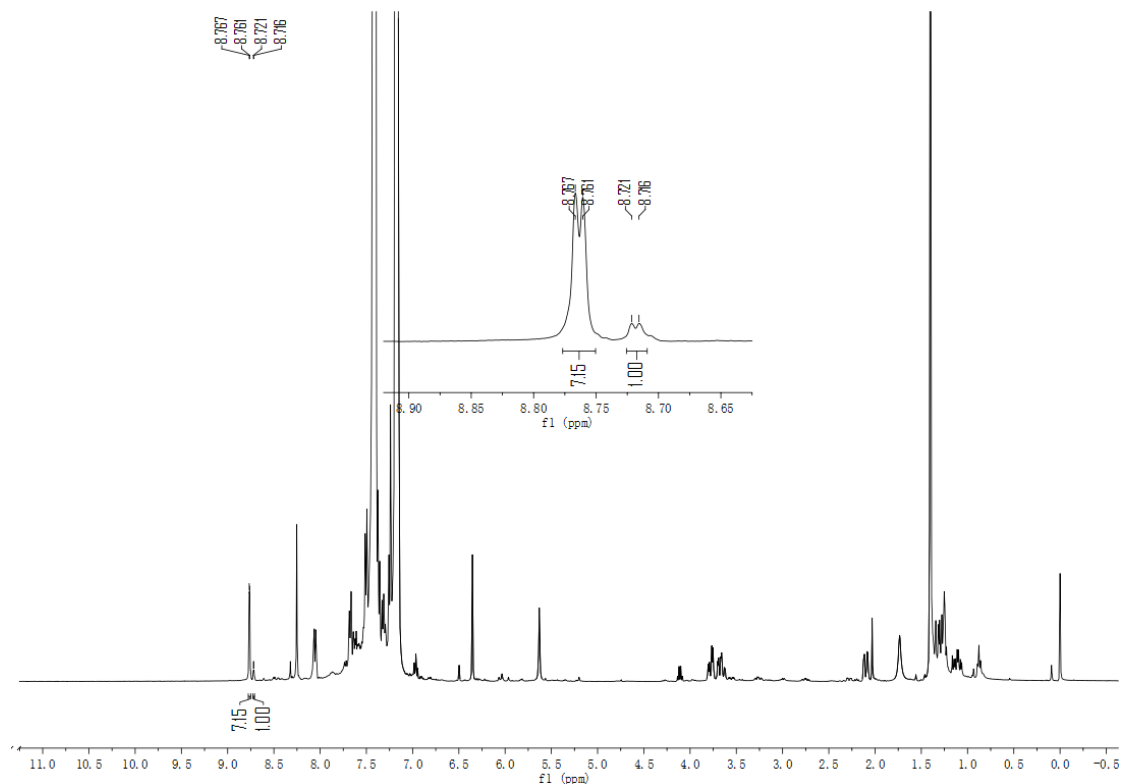

**N-(tert-butyl)-2-(8'-oxo-5',6'-dihydrospiro[indole-3,4'-thieno[2,3-c]azepin]-7'(8'H)-yl)-2-phenylacetamide (23down)**

$^1\text{H}$  NMR (400 MHz,  $\text{CDCl}_3$ ):

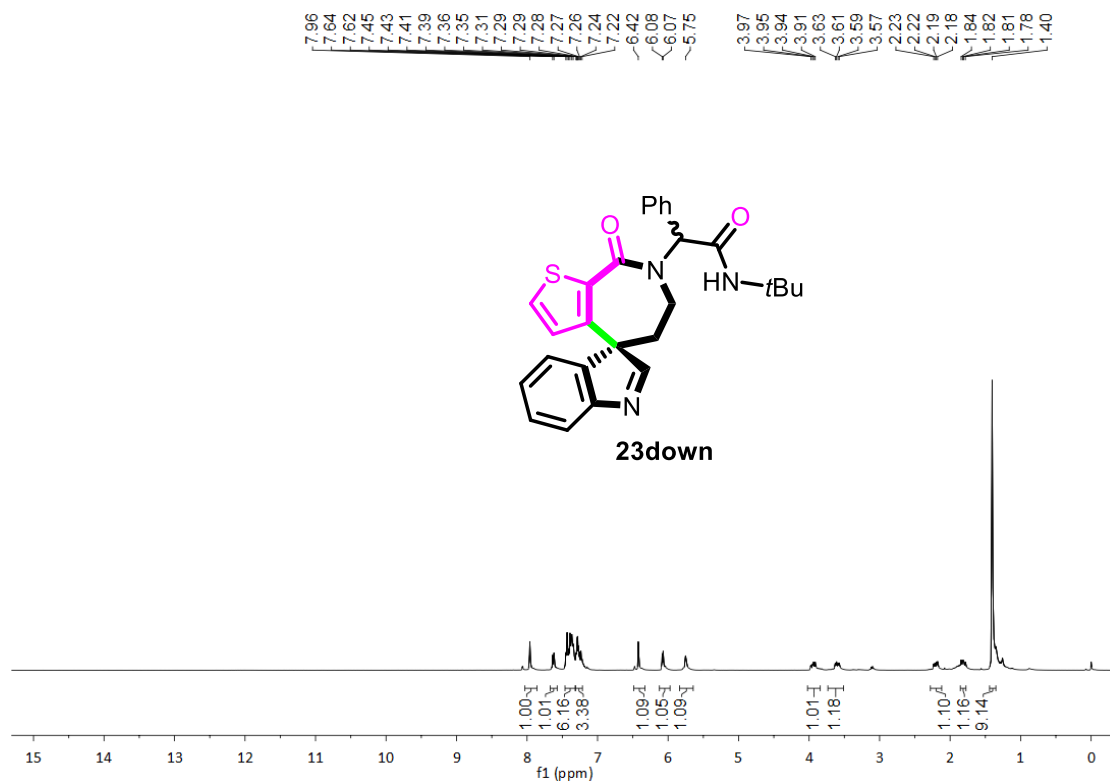

**<sup>13</sup>C NMR (100 MHz, CDCl<sub>3</sub>):**

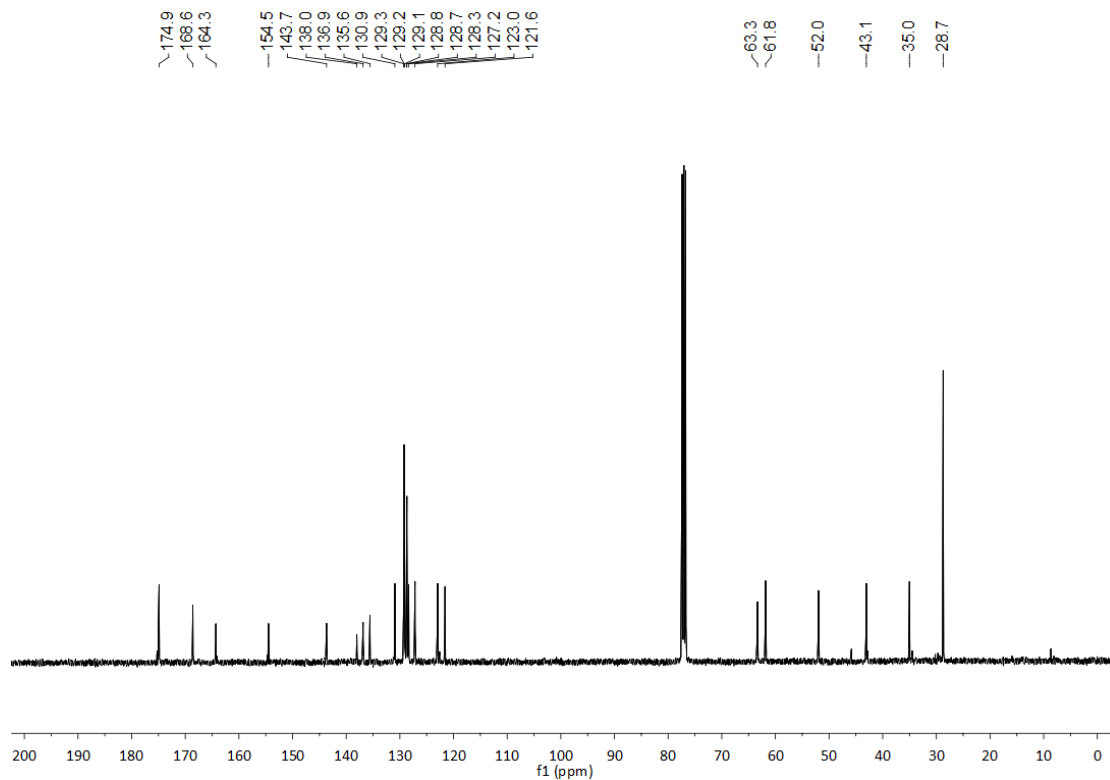

DEPT



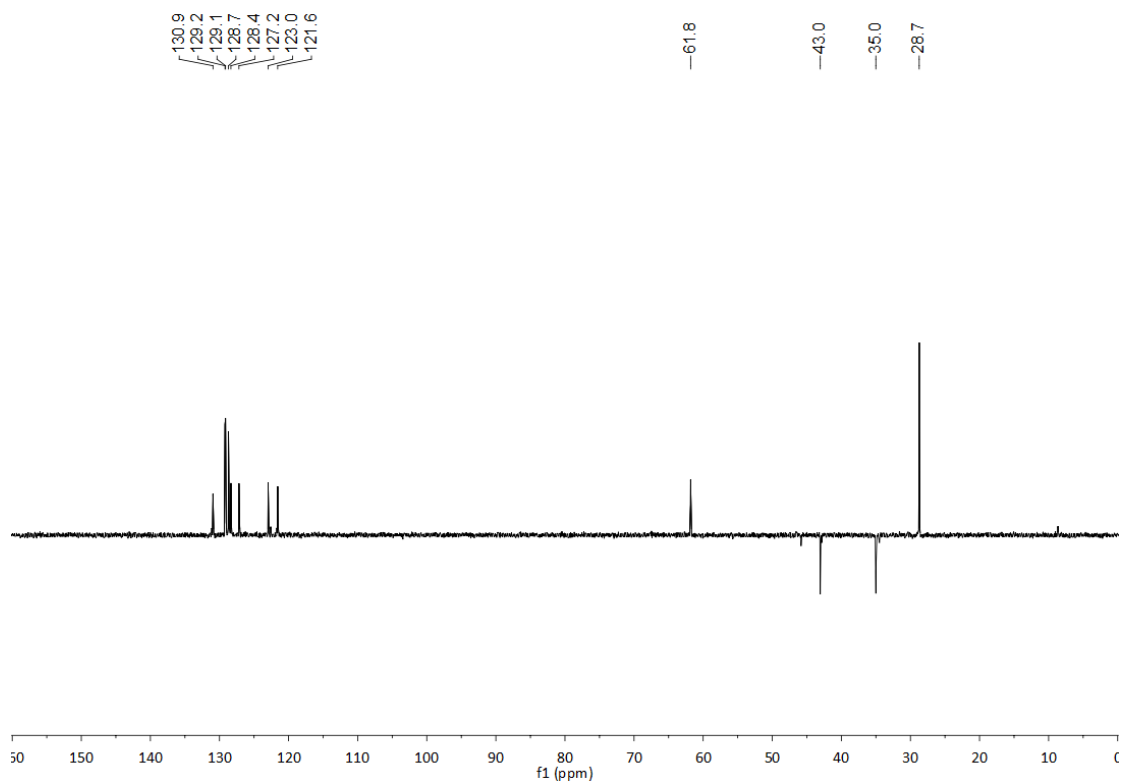

**N-(tert-butyl)-2-(5'-methyl-1-oxo-3,4-dihydrospiro[benzo[c]azepine-5,3'-indol]-2(1H)-yl)-2-phenylacetamide (24down)**

**<sup>1</sup>H NMR (400 MHz, CDCl<sub>3</sub>):**

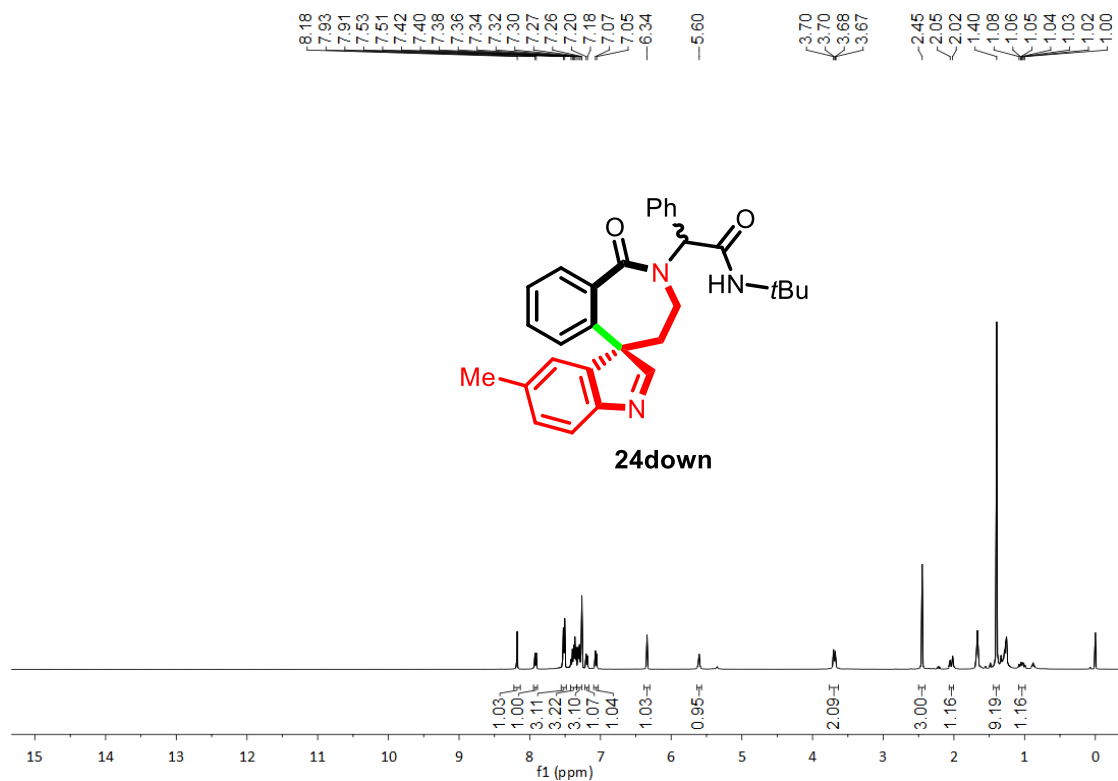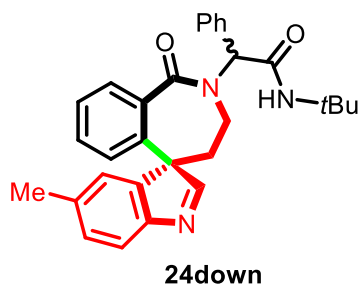

**<sup>13</sup>C NMR (100 MHz, CDCl<sub>3</sub>):**

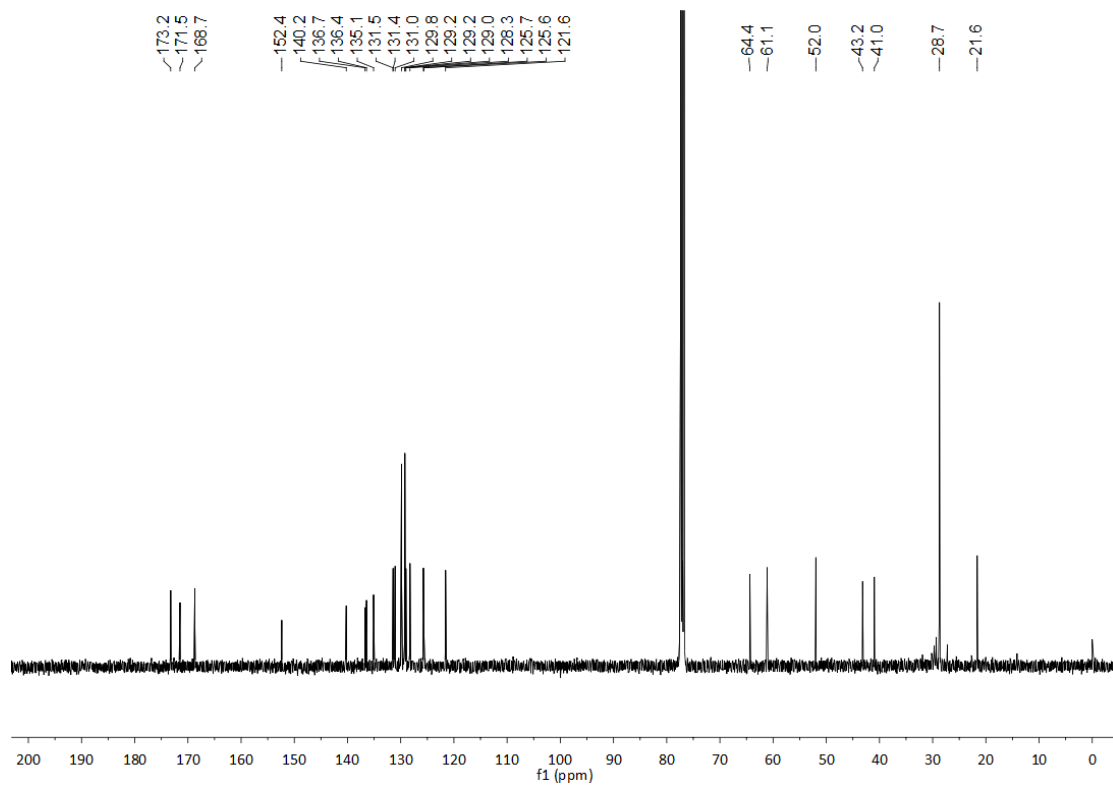

DEPT

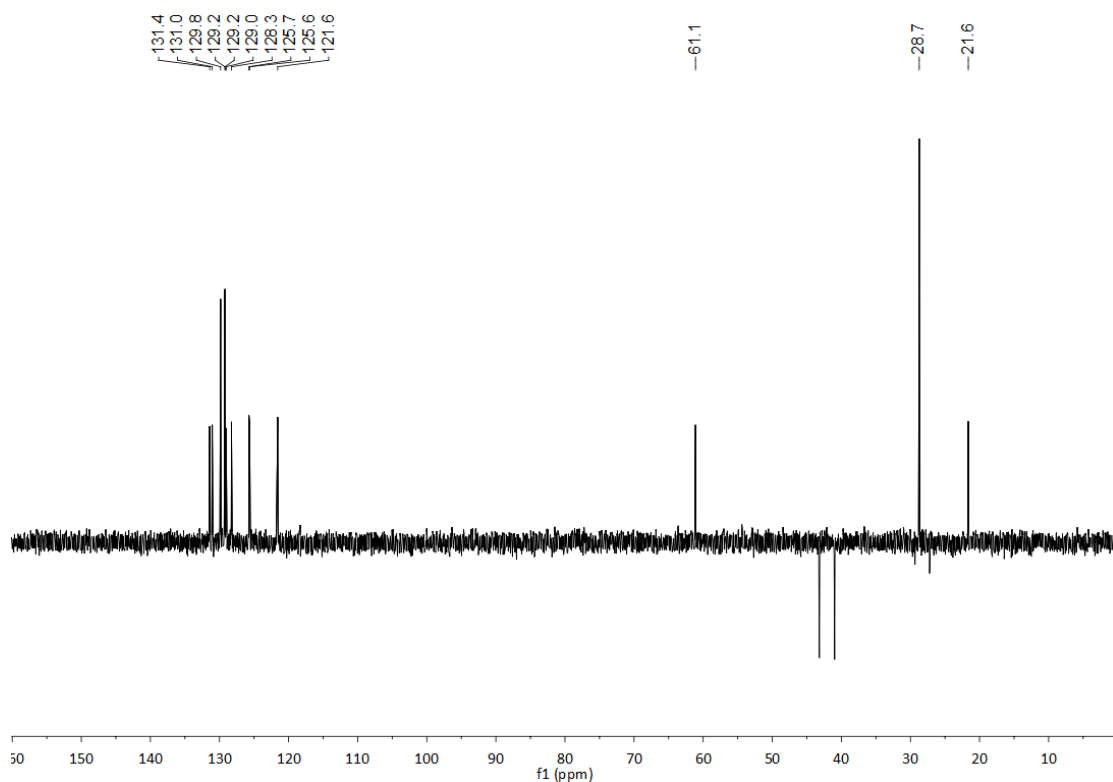

**N-(tert-butyl)-2-(5'-methyl-1-oxo-3,4-dihydrospiro[benzo[c]azepine-5,3'-indol]-2(1H)-yl)-2-phenylacetamide (24up)**

**<sup>1</sup>H NMR (400 MHz, CDCl<sub>3</sub>):**

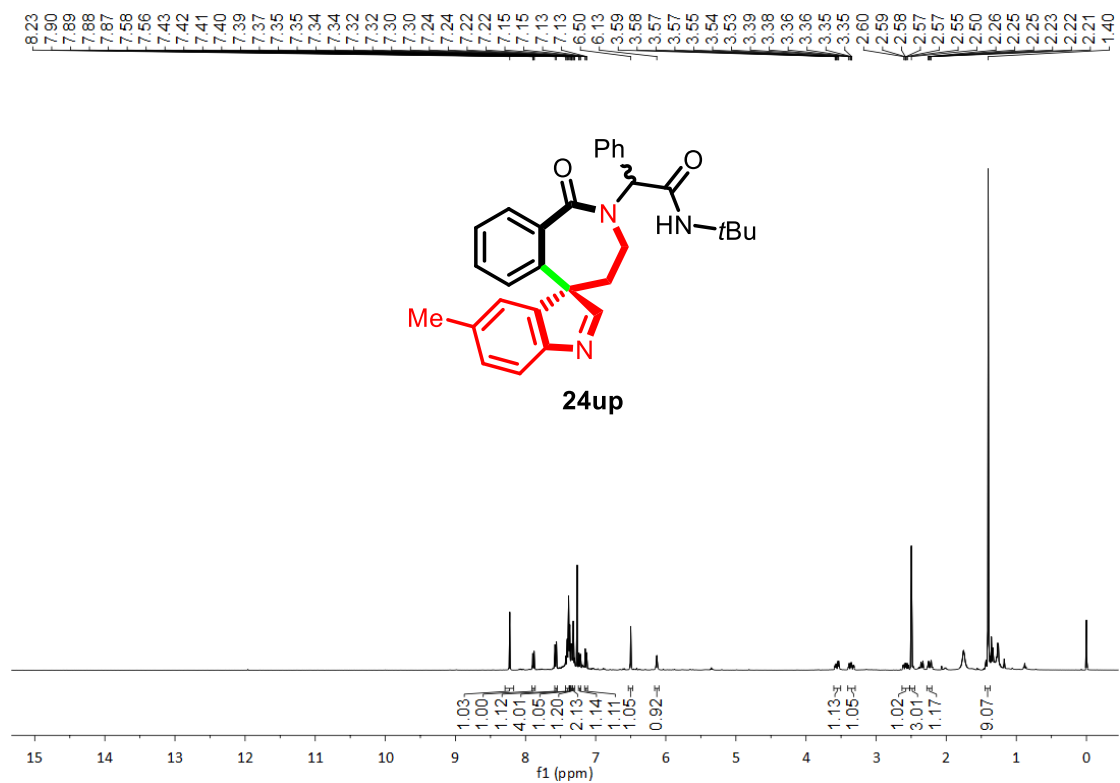

**<sup>13</sup>C NMR (100 MHz, CDCl<sub>3</sub>):**

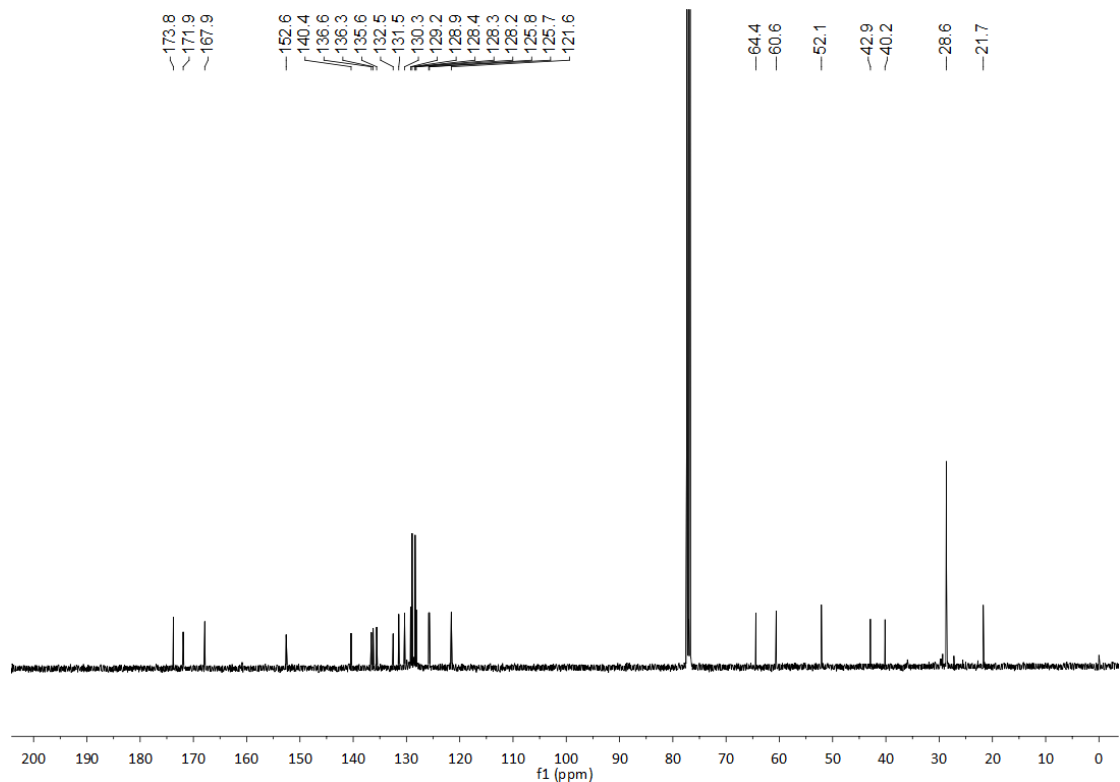

**DEPT**

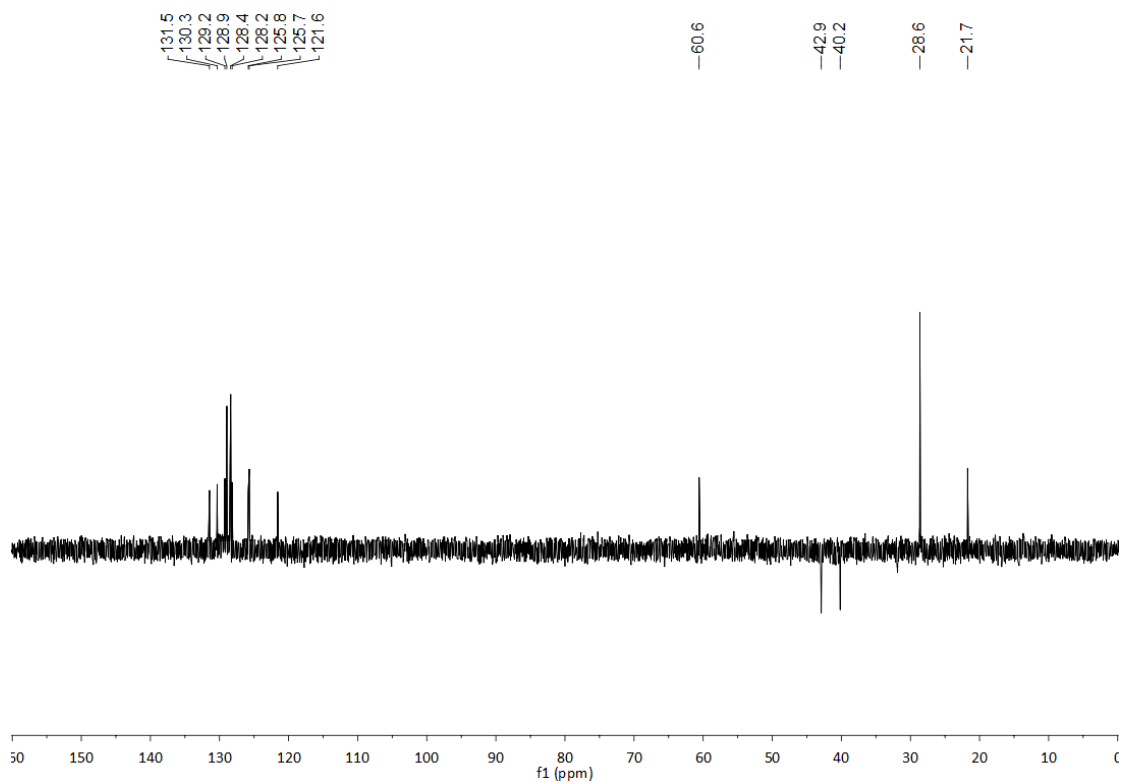

24 crude <sup>1</sup>H NMR

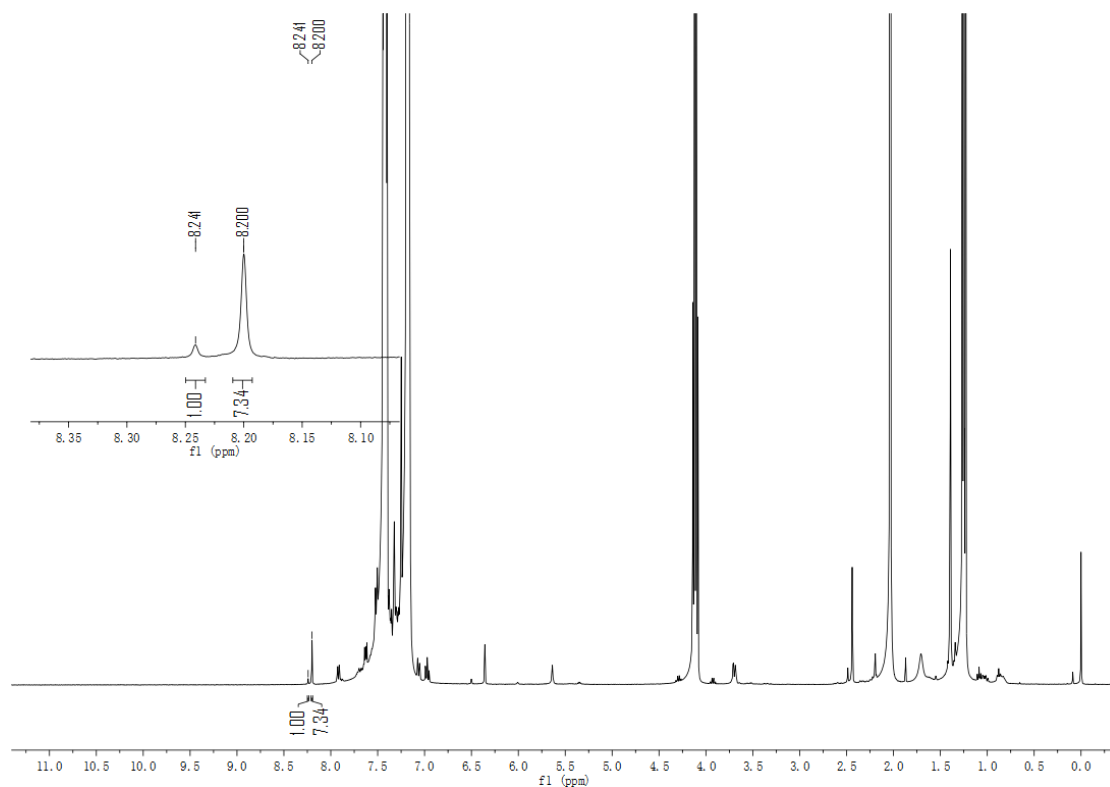

N-(tert-butyl)-2-(5'-methoxy-1-oxo-3,4-dihydrospiro[benzo[c]azepine-5,3'-indol]-2(1H)-yl)-2-phenylacetamide (25up)

<sup>1</sup>H NMR (400 MHz, CDCl<sub>3</sub>):

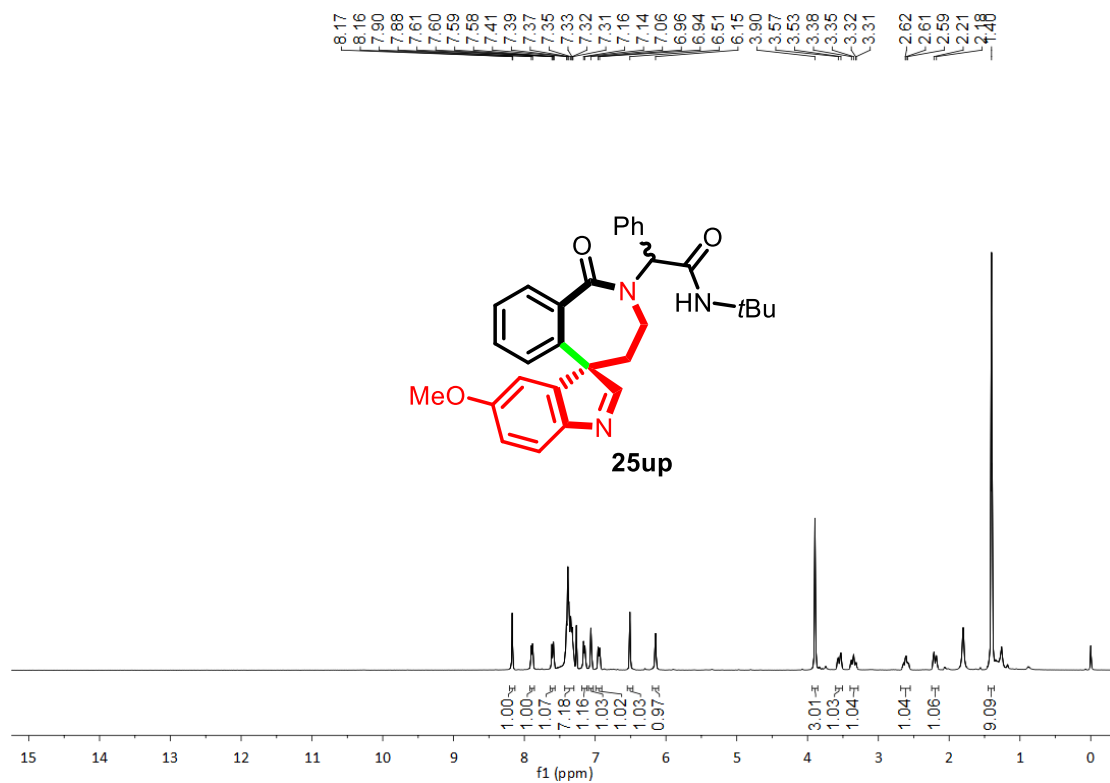

**<sup>13</sup>C NMR (100 MHz, CDCl<sub>3</sub>):**

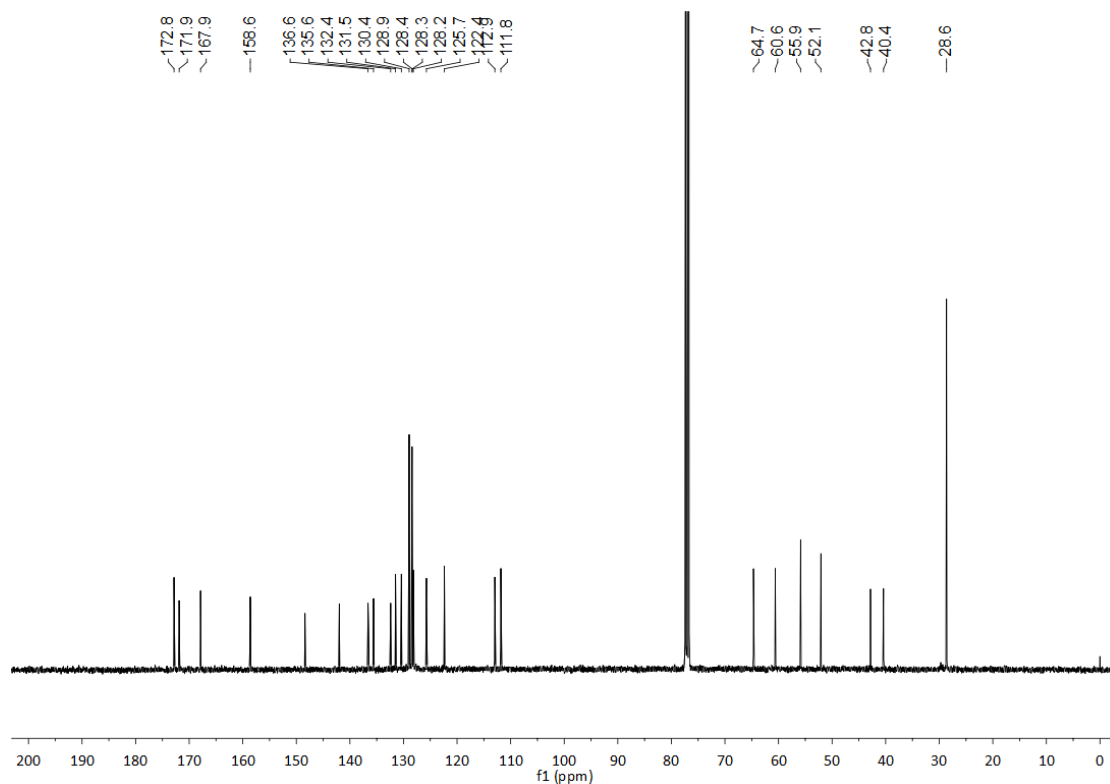

**DEPT**

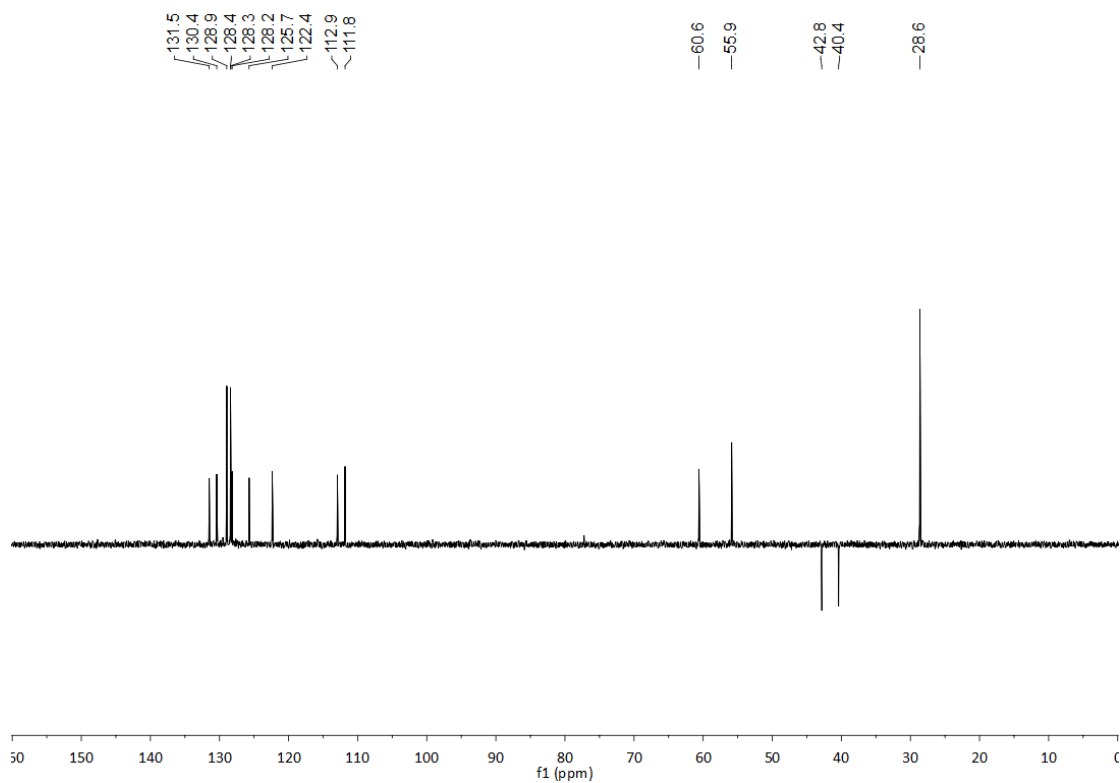

**N-(tert-butyl)-2-(7'-methyl-1-oxo-3,4-dihydrospiro[benzo[c]azepine-5,3'-indol]-2(1H)-yl)-2-phenylacetamide (26down)**

**<sup>1</sup>H NMR (400 MHz, CDCl<sub>3</sub>):**

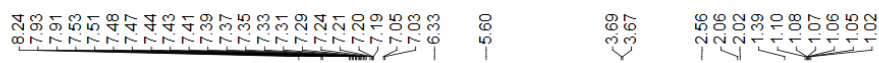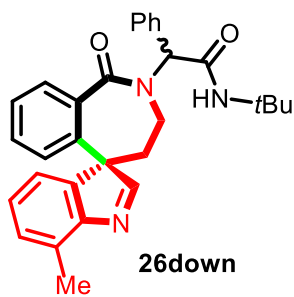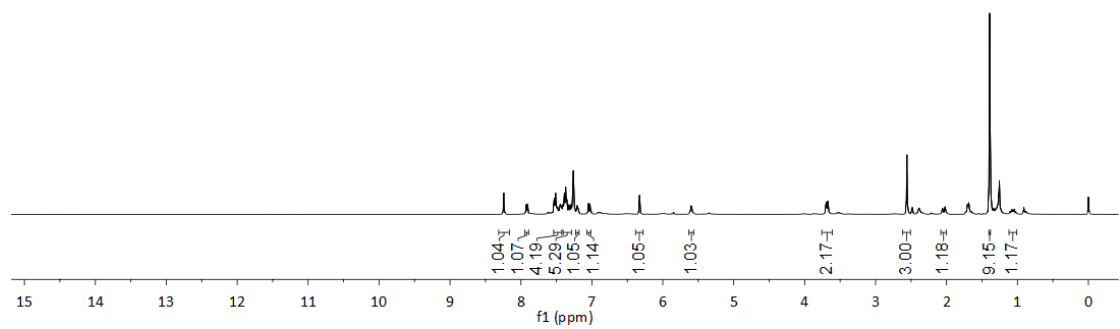

**<sup>13</sup>C NMR (100 MHz, CDCl<sub>3</sub>):**

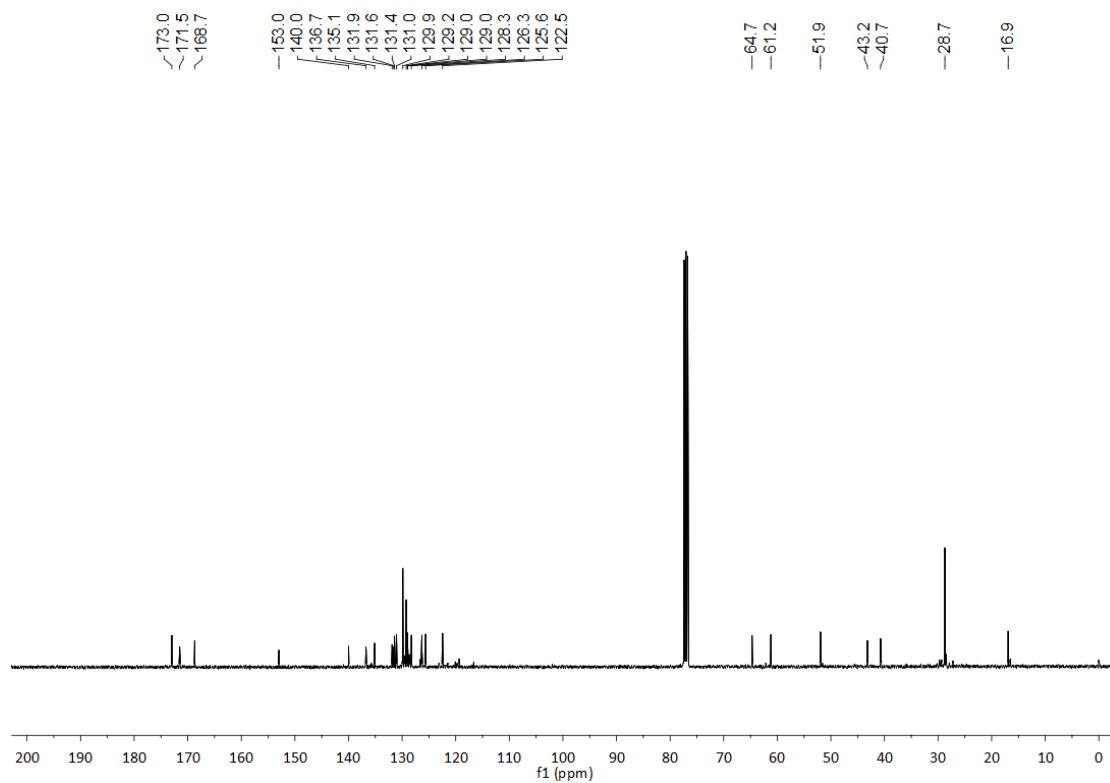

**DEPT**

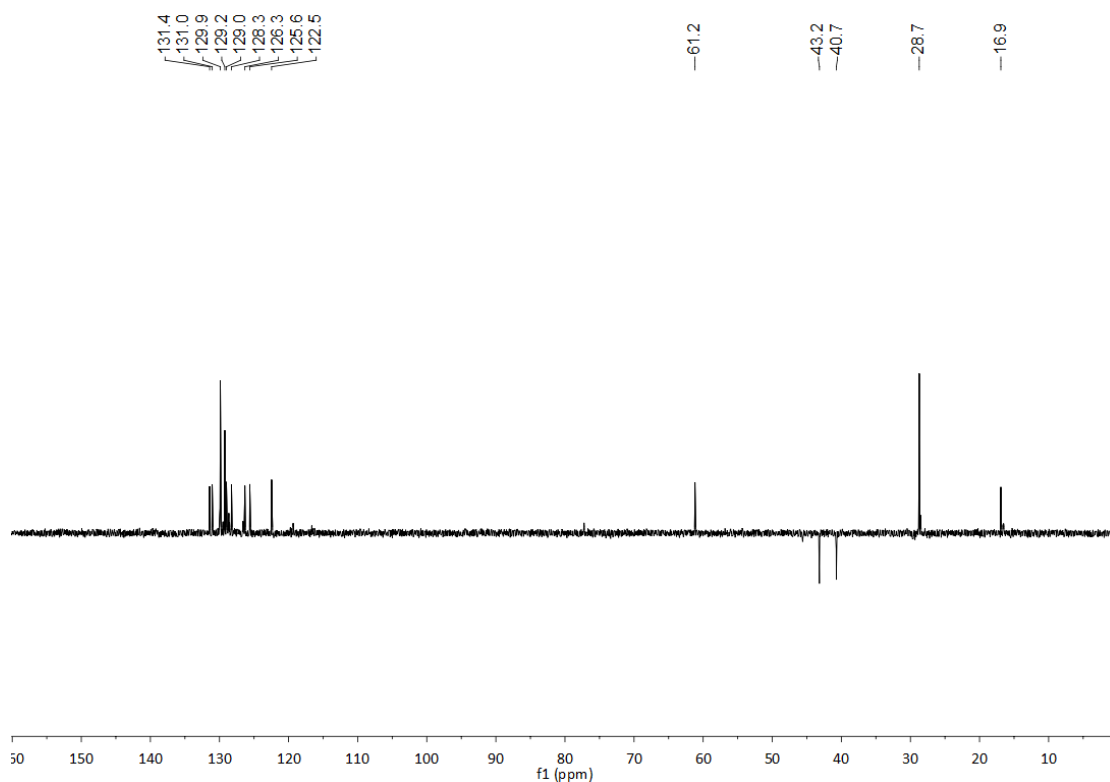

**N-(tert-butyl)-2-(7'-methyl-1-oxo-3,4-dihydrospiro[benzo[c]azepine-5,3'-indol]-2(1H)-yl)-2-phenylacetamide (26up)**

**<sup>1</sup>H NMR (400 MHz, CDCl<sub>3</sub>):**

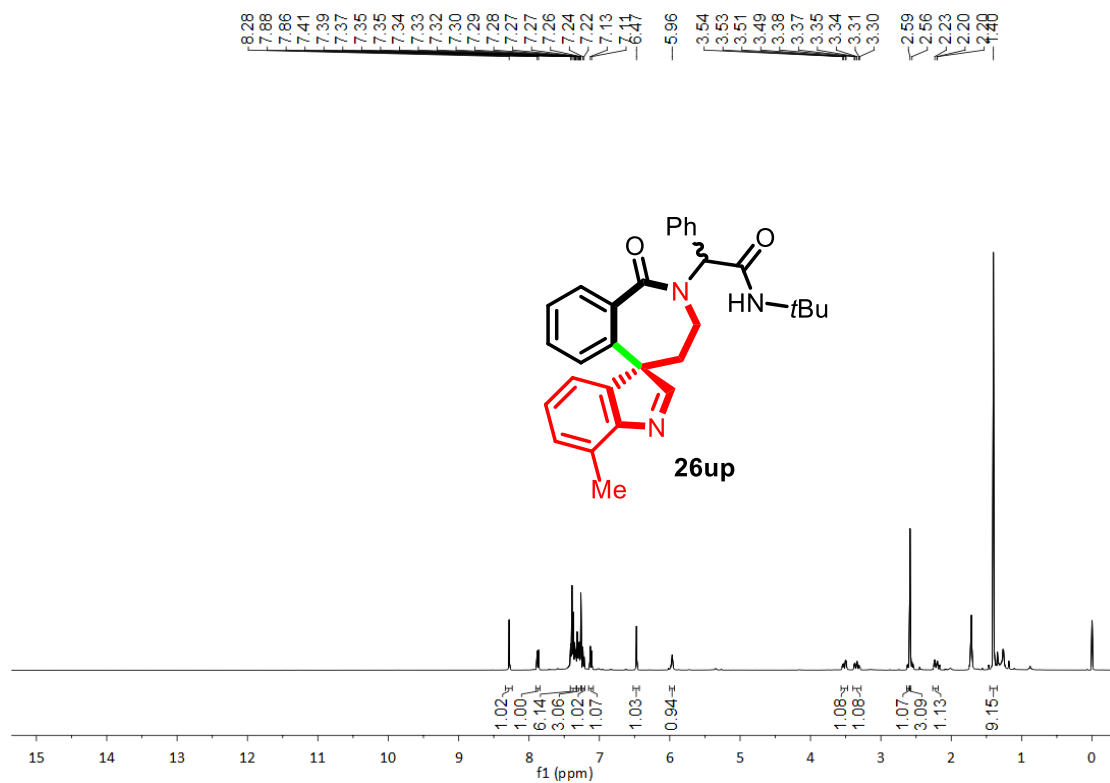

**<sup>13</sup>C NMR (100 MHz, CDCl<sub>3</sub>):**

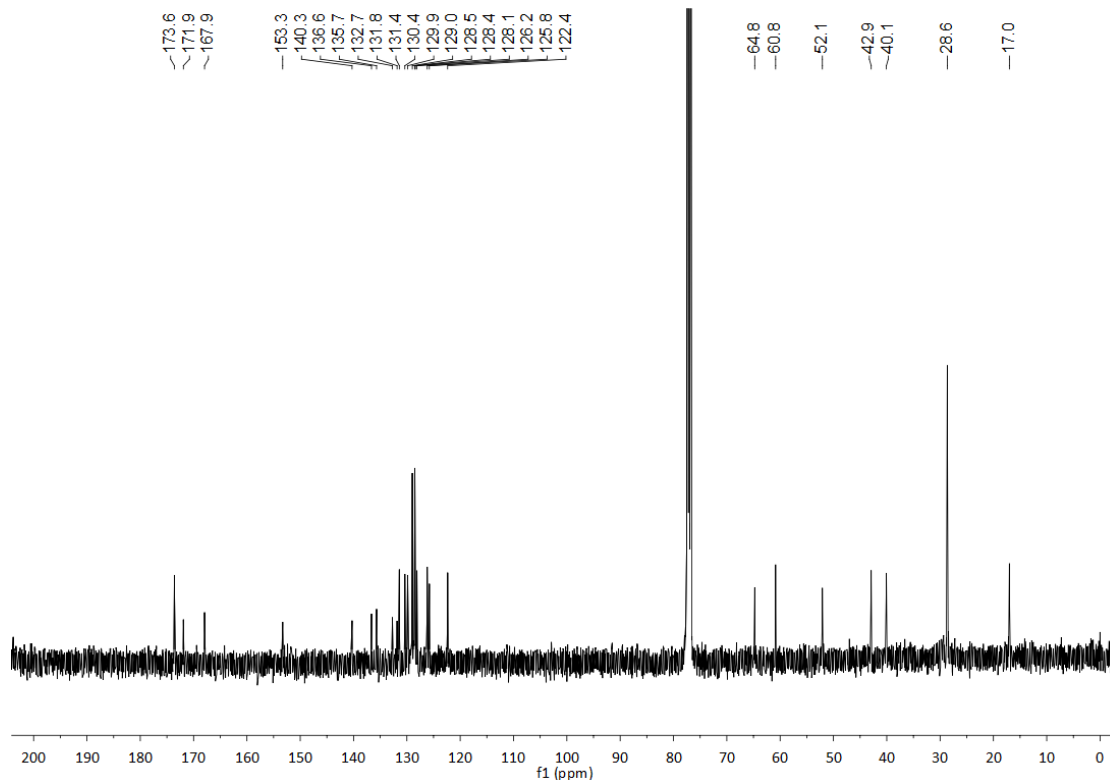

**DEPT**



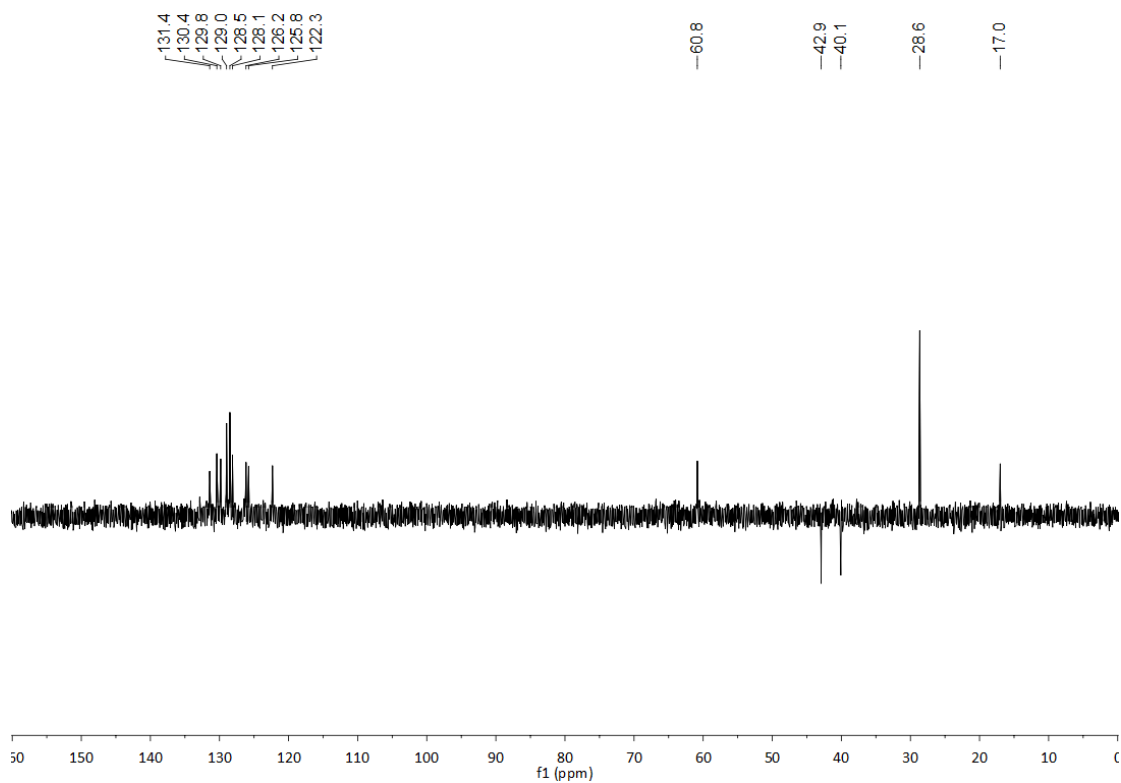

26 crude  $^1\text{H}$  NMR

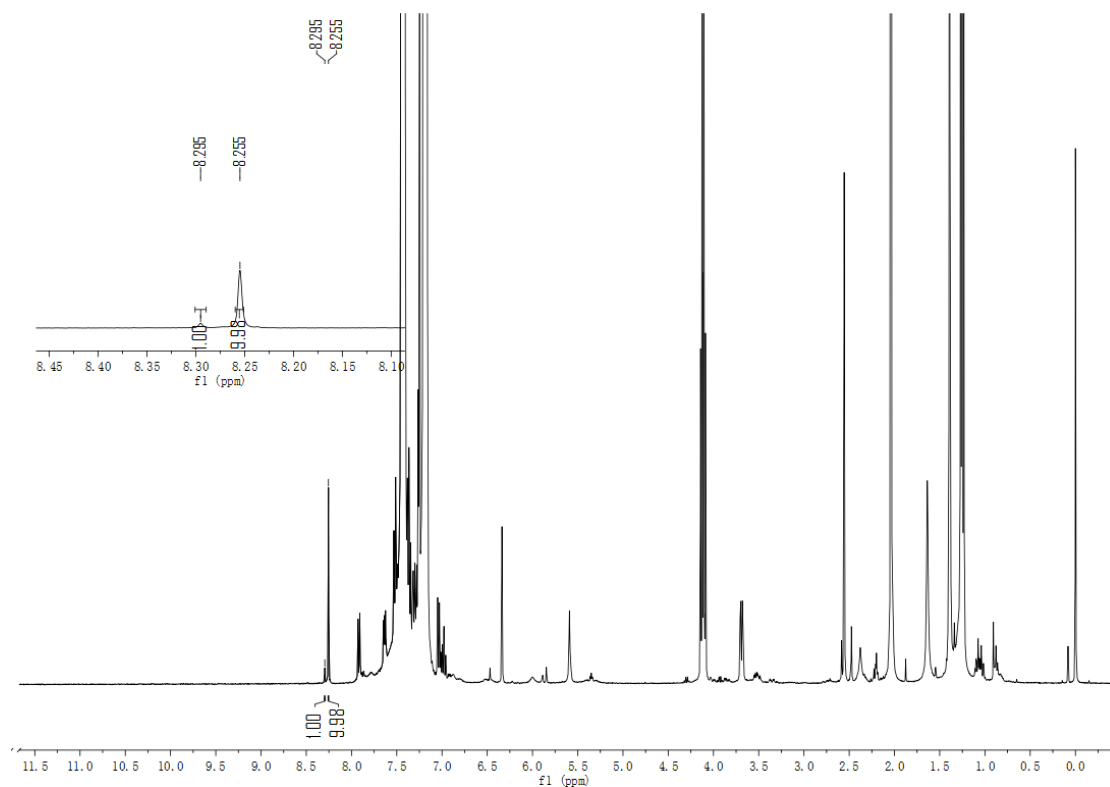

**N-(tert-butyl)-2-(6'-fluoro-1-oxo-3,4-dihydrospiro[benzo[c]azepine-5,3'-indol]-2(1H)-yl)-2-phenyl acetamide (27down)**

**$^1\text{H}$  NMR (400 MHz,  $\text{CDCl}_3$ ):**

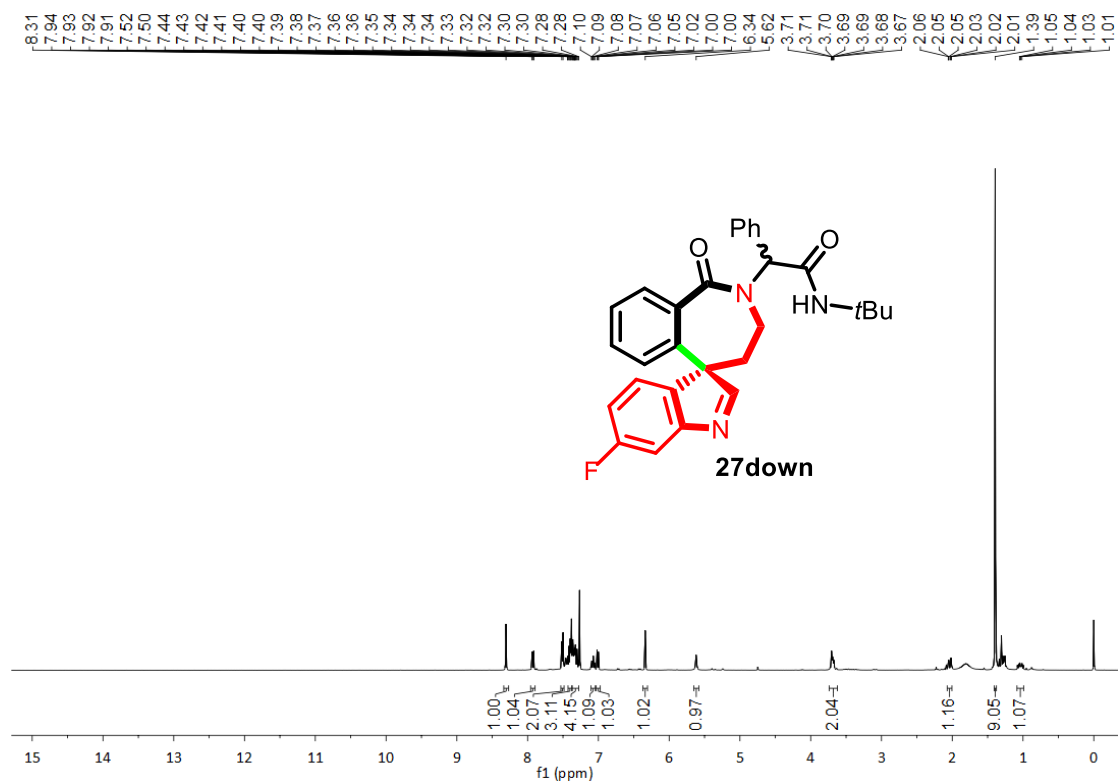

**<sup>13</sup>C NMR (100 MHz, CDCl<sub>3</sub>):**

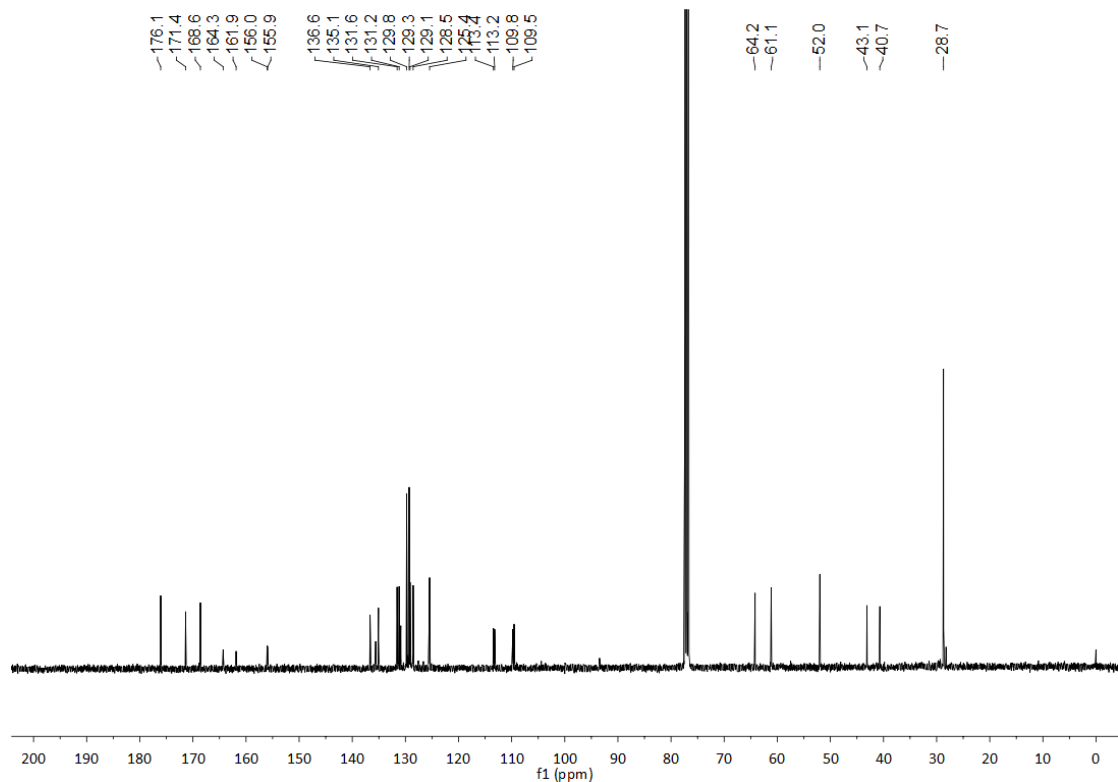

**DEPT**

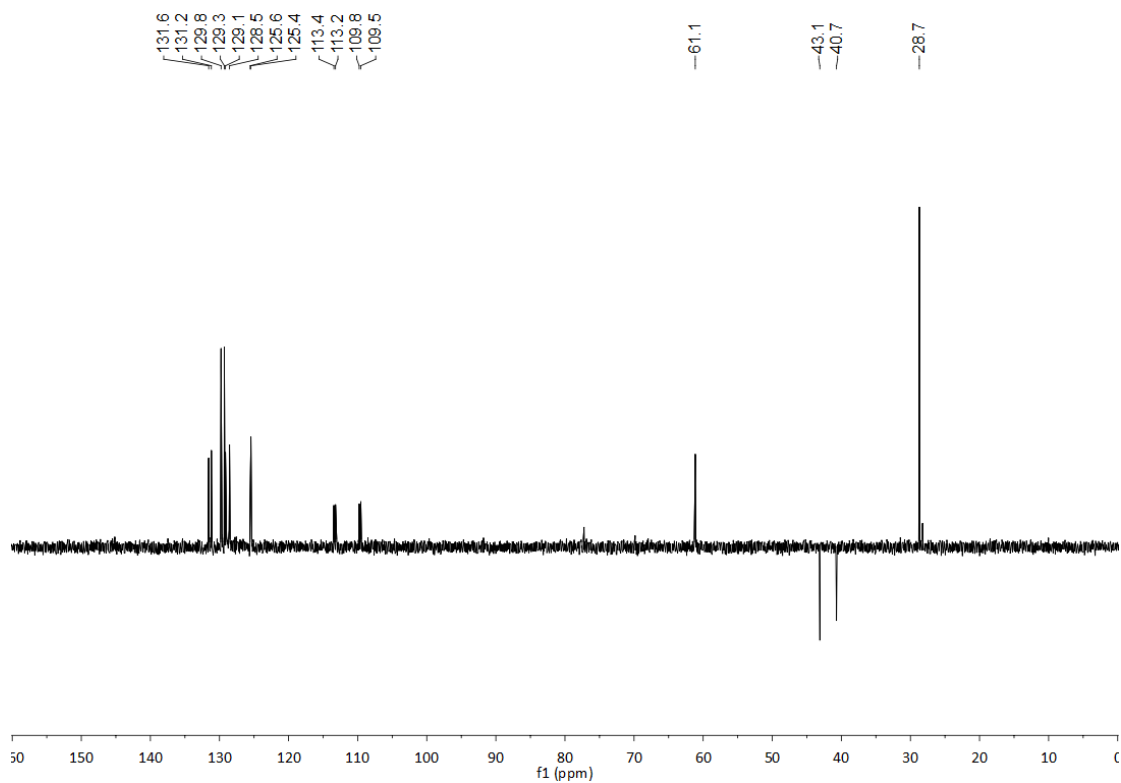

<sup>19</sup>F NMR (376MHz, CDCl<sub>3</sub>)

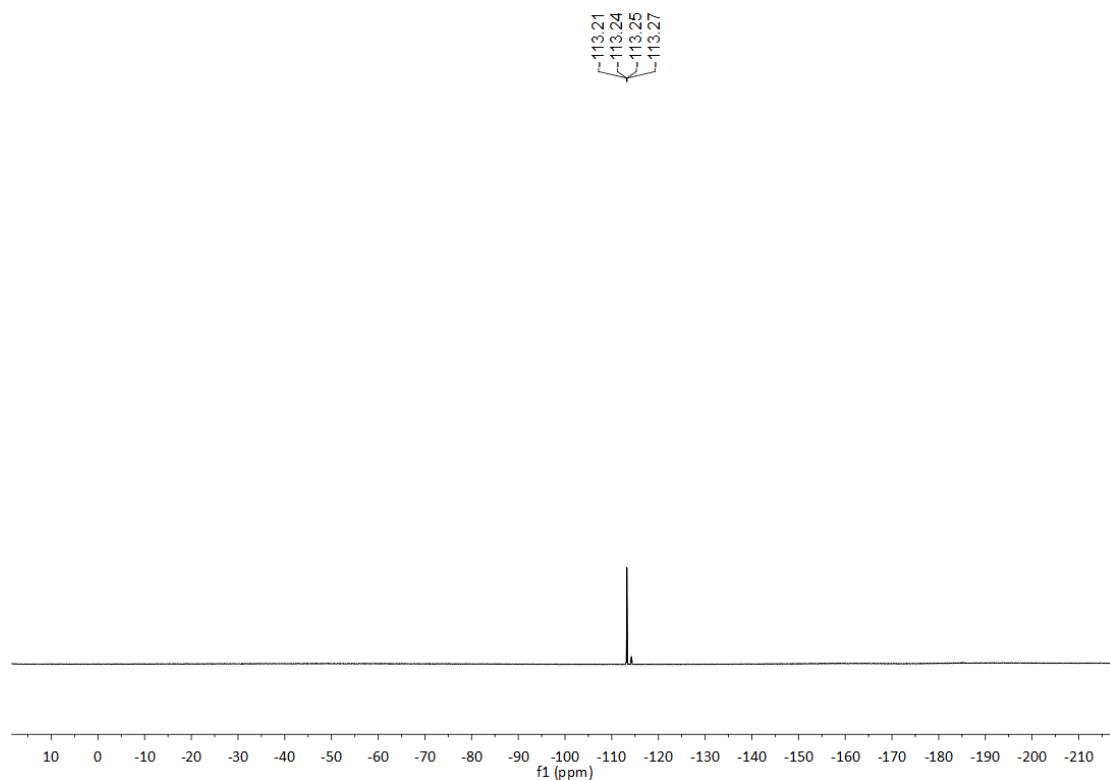

**N-(tert-butyl)-2-(6'-chloro-1-oxo-3,4-dihydrospiro[benzo[c]azepine-5,3'-indol]-2(1H)-yl)-2-phenyl acetamide (28down)**

<sup>1</sup>H NMR (400 MHz, CDCl<sub>3</sub>):

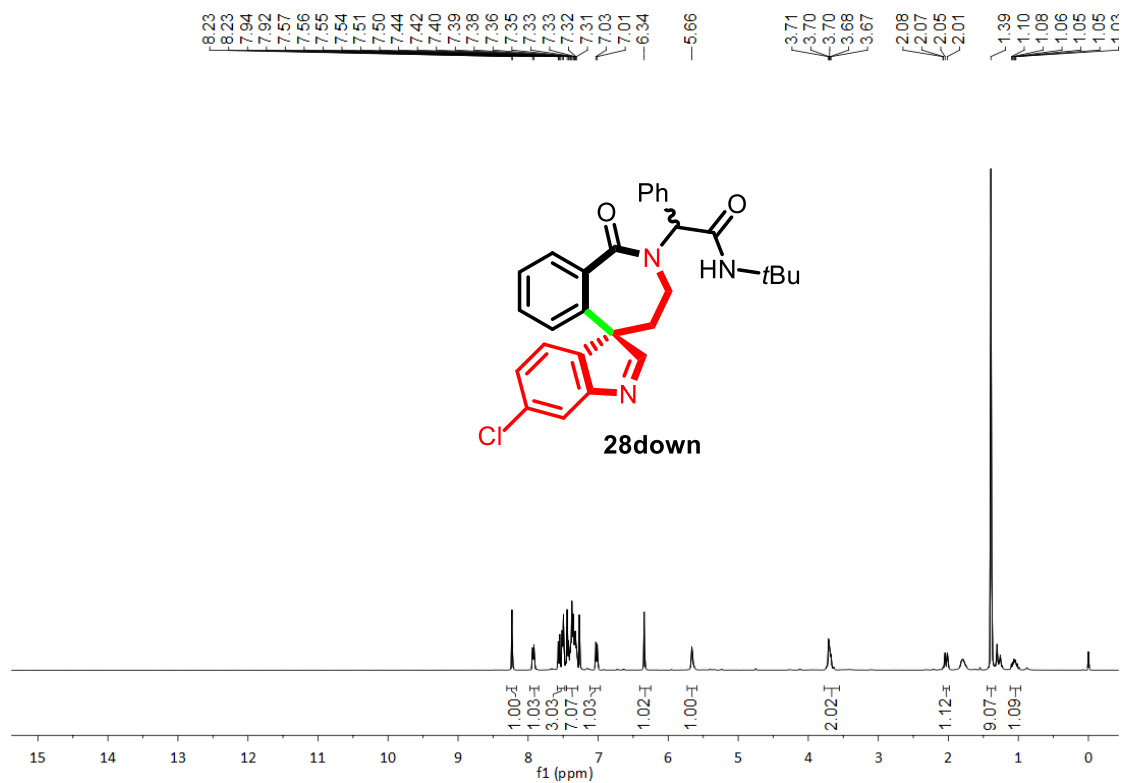

**<sup>13</sup>C NMR (100 MHz, CDCl<sub>3</sub>):**

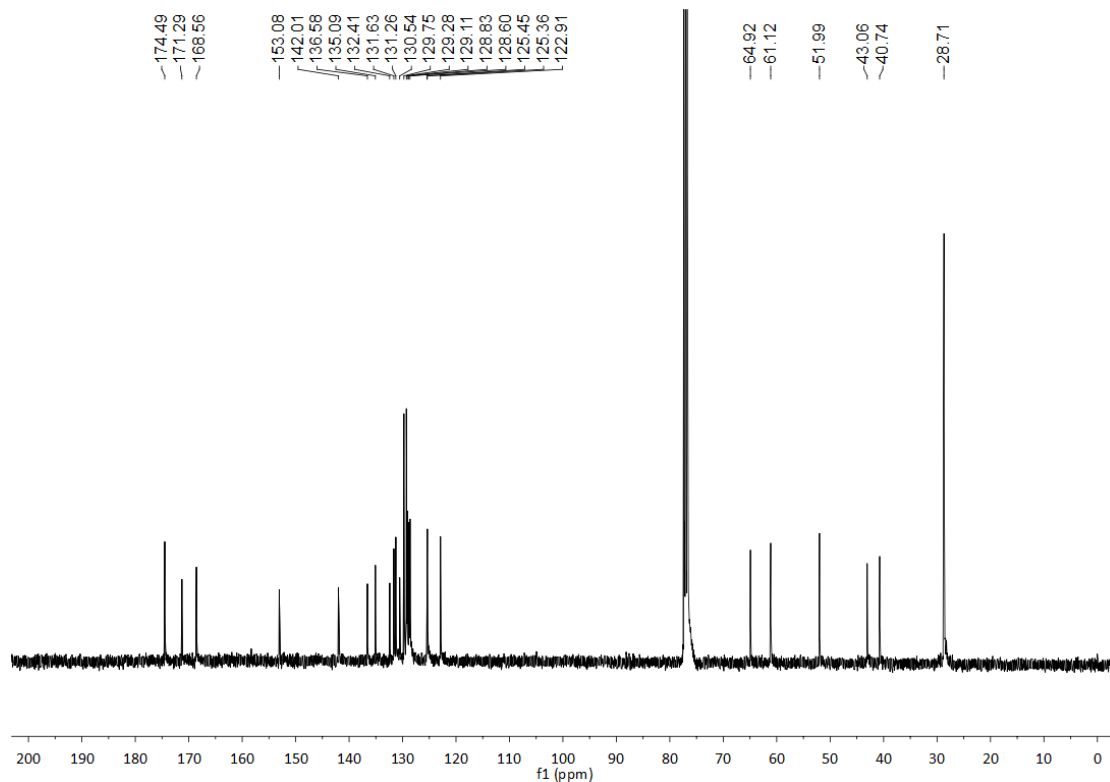

**DEPT**

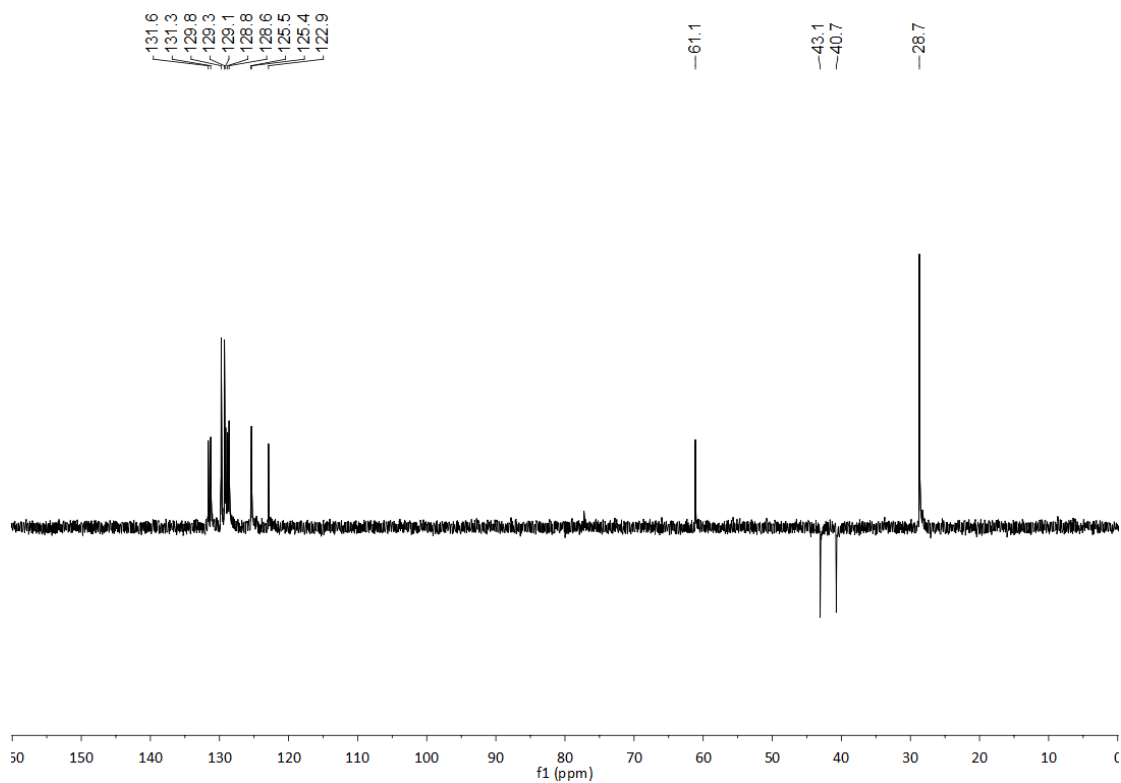

**N-(tert-butyl)-2-(6'-chloro-1-oxo-3,4-dihydrospiro[benzo[c]azepine-5,3'-indol]-2(1H)-yl)-2-phenyl acetamide (28up)**

**<sup>1</sup>H NMR (400 MHz, CDCl<sub>3</sub>):**

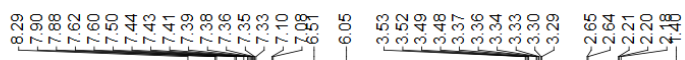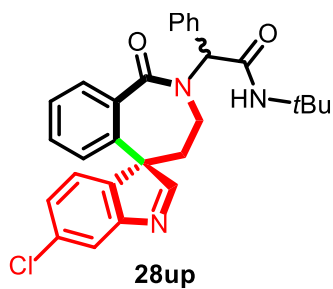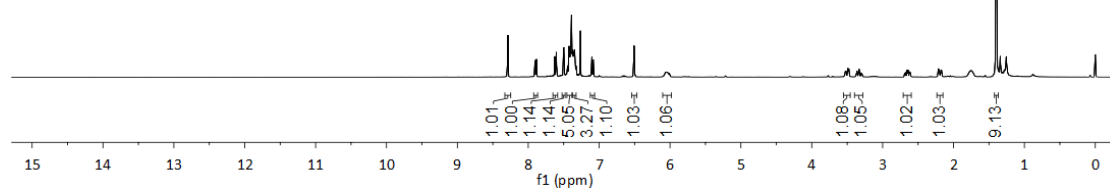

**<sup>13</sup>C NMR (100 MHz, CDCl<sub>3</sub>):**

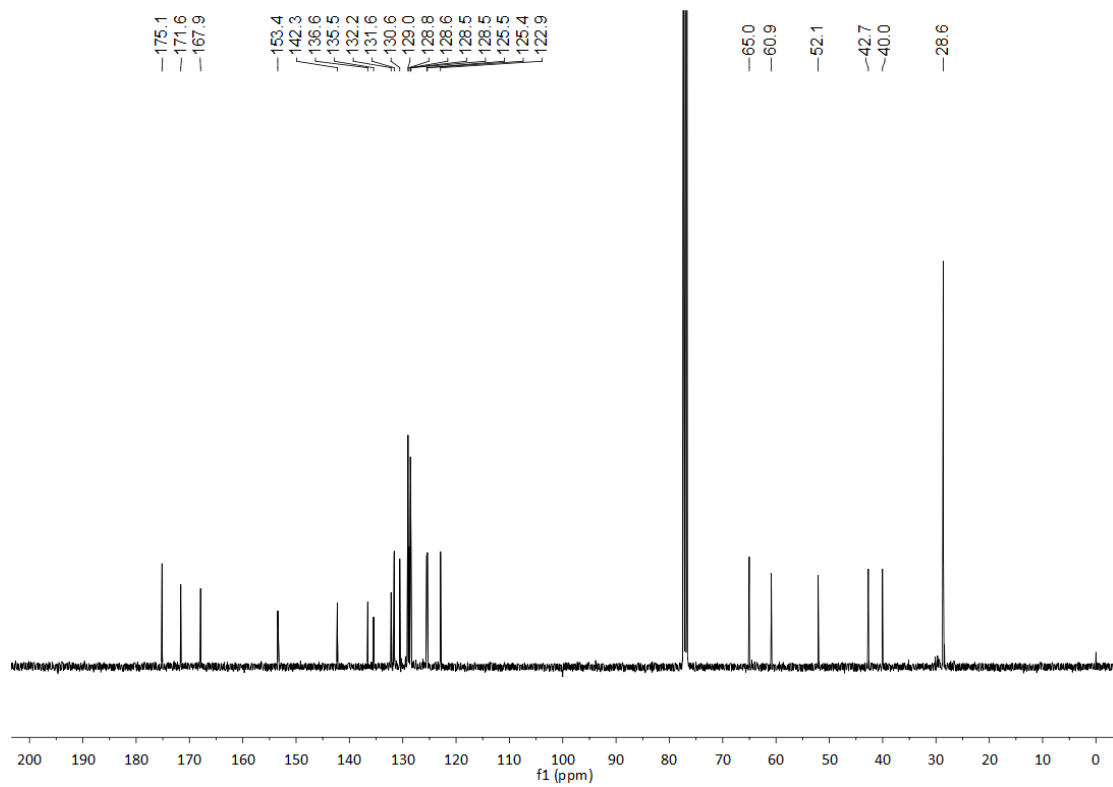

**DEPT**

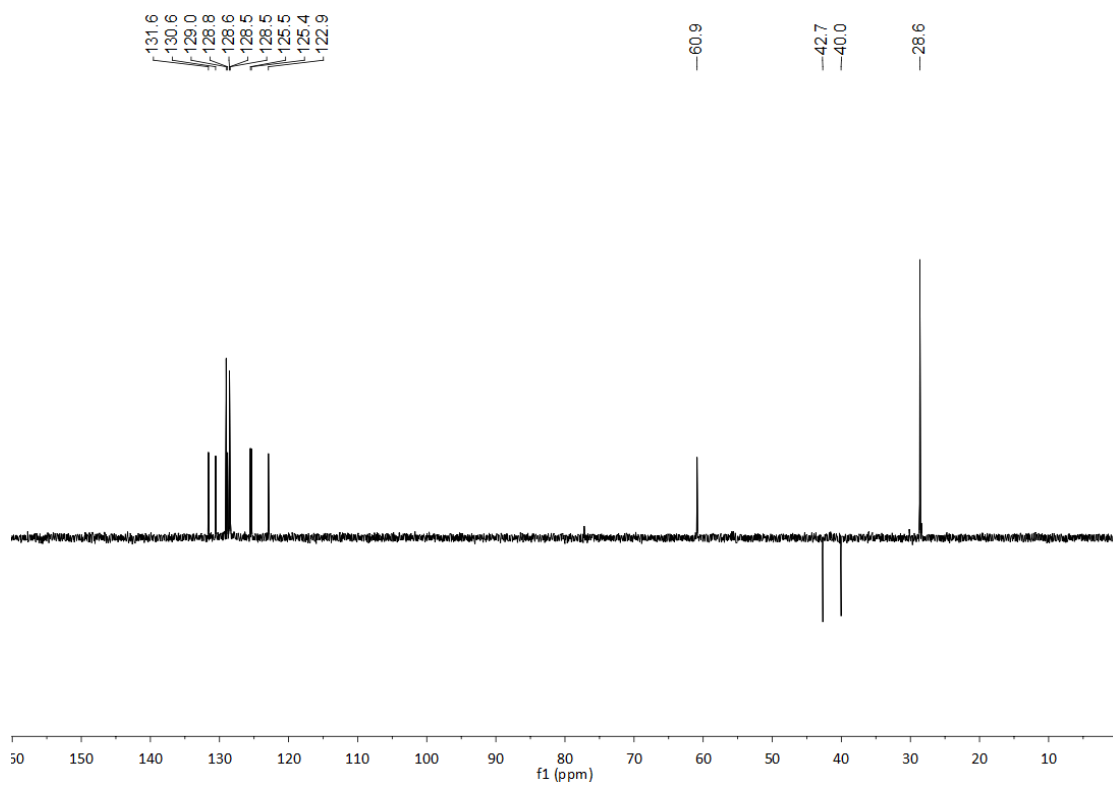

**28 crude <sup>1</sup>H NMR**

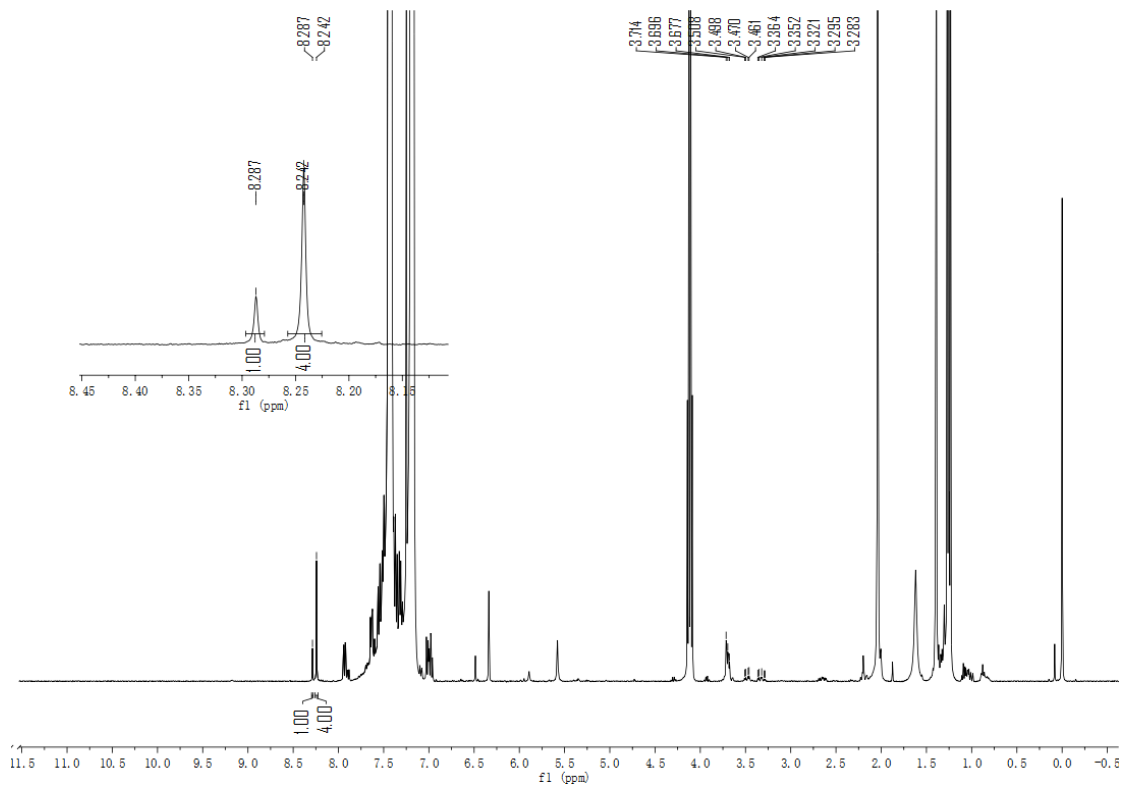

**2-(5'-bromo-1-oxo-3,4-dihydrospiro[benzo[c]azepine-5,3'-indol]-2(1H)-yl)-N-(tert-butyl)-2-phenyl acetamide (29down)**

**<sup>1</sup>H NMR (400 MHz, CDCl<sub>3</sub>):**

8.22, 7.94, 7.94, 7.92, 7.61, 7.60, 7.52, 7.52, 7.51, 7.49, 7.46, 7.45, 7.44, 7.43, 7.43, 7.41, 7.41, 7.39, 7.39, 7.38, 7.37, 7.36, 7.35, 7.35, 7.34, 7.33, 7.33, 7.32, 7.31, 7.31, 7.03, 7.03, 7.01, 7.01, 6.33, 5.62, 3.71, 3.70, 3.70, 3.68, 3.67, 2.06, 2.05, 2.05, 2.02, 2.02, 2.01, 1.39, 1.09, 1.07, 1.06, 1.05, 1.04, 1.03, 1.02, 1.00

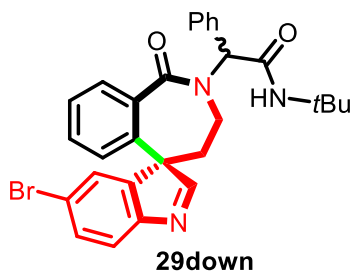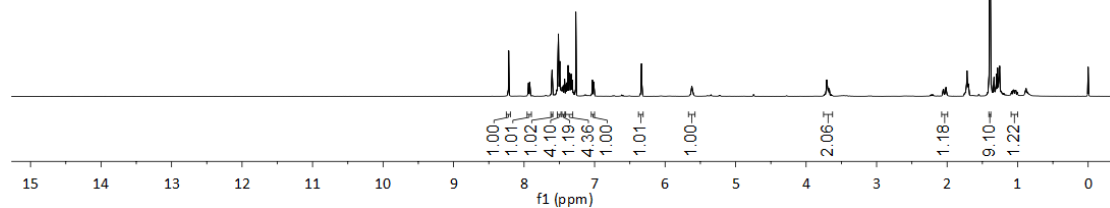

**<sup>13</sup>C NMR (100 MHz, CDCl<sub>3</sub>):**

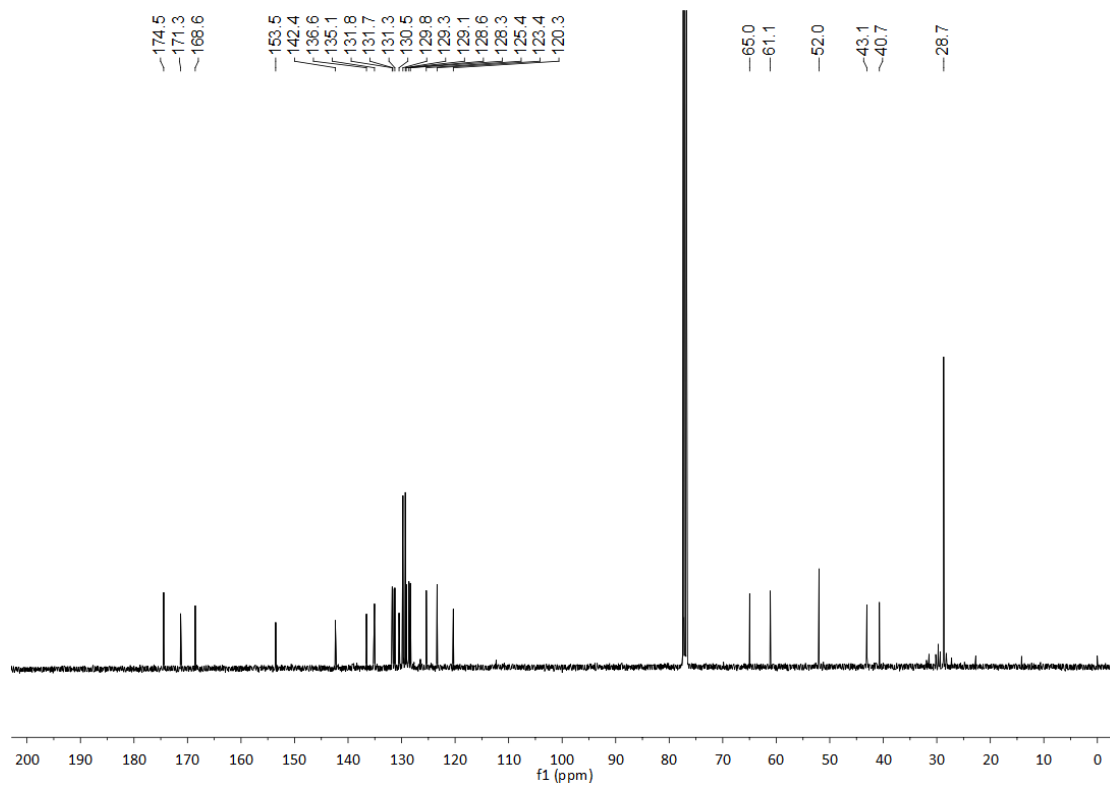

DEPT

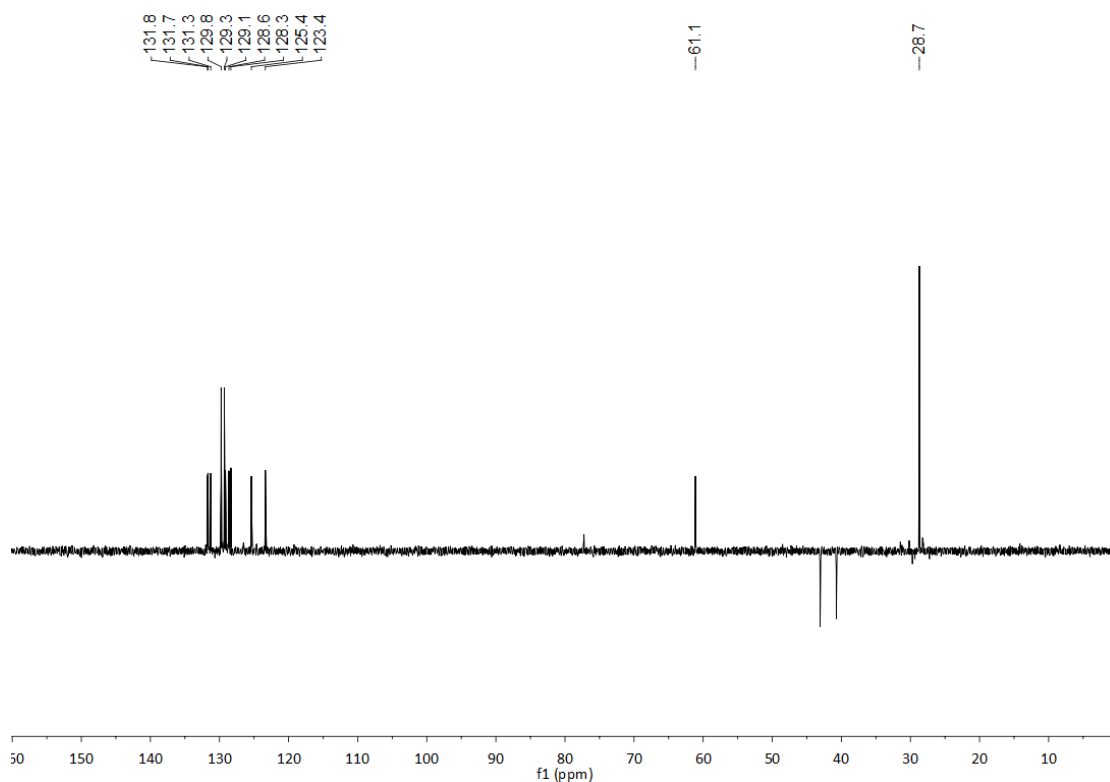

**N-butyl-2-(1-oxo-3,4-dihydrospiro[benzo[c]azepine-5,3'-indol]-2(1H)-yl)-2-phenylacetamide  
(30down)**

**<sup>1</sup>H NMR (400 MHz, CDCl<sub>3</sub>):**



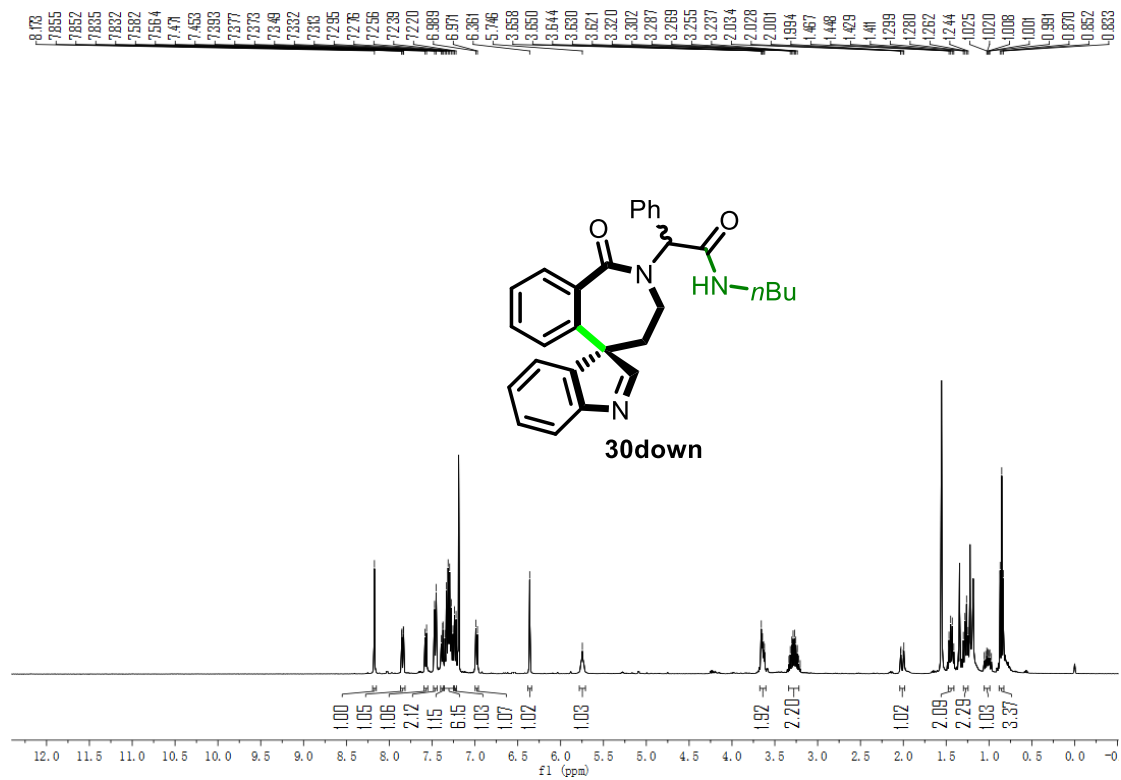

**<sup>13</sup>C NMR (100 MHz, CDCl<sub>3</sub>):**

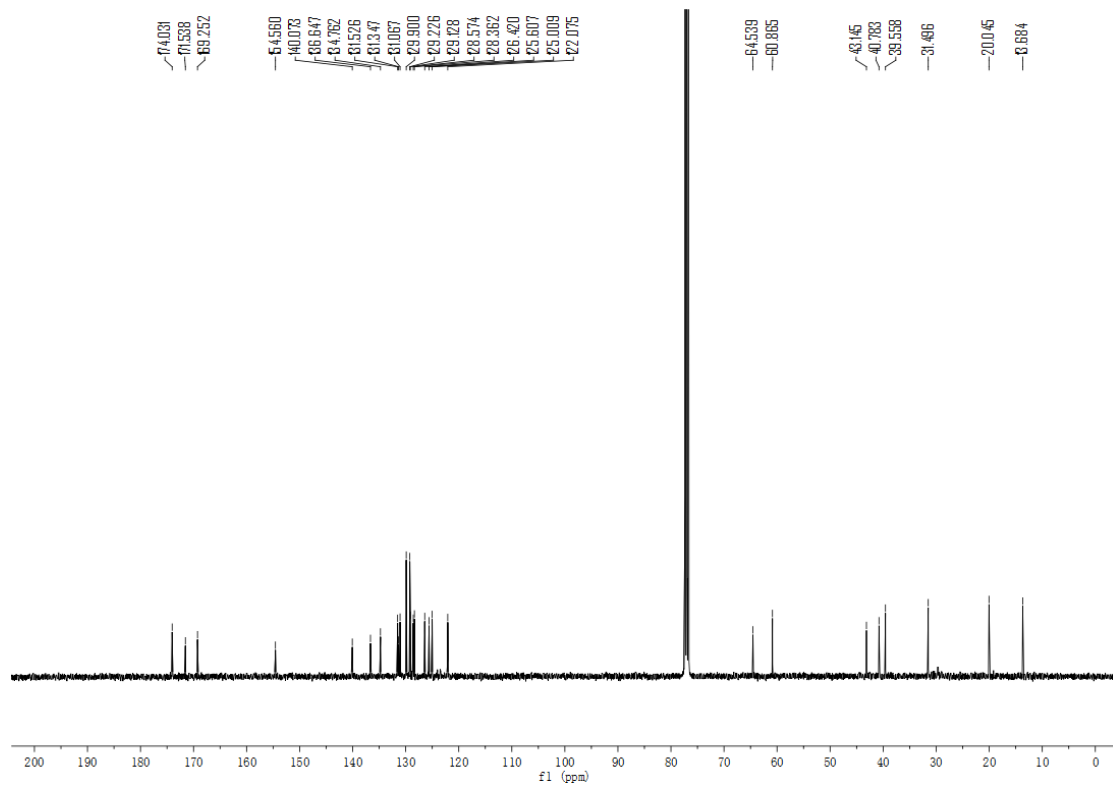

**DEPT**

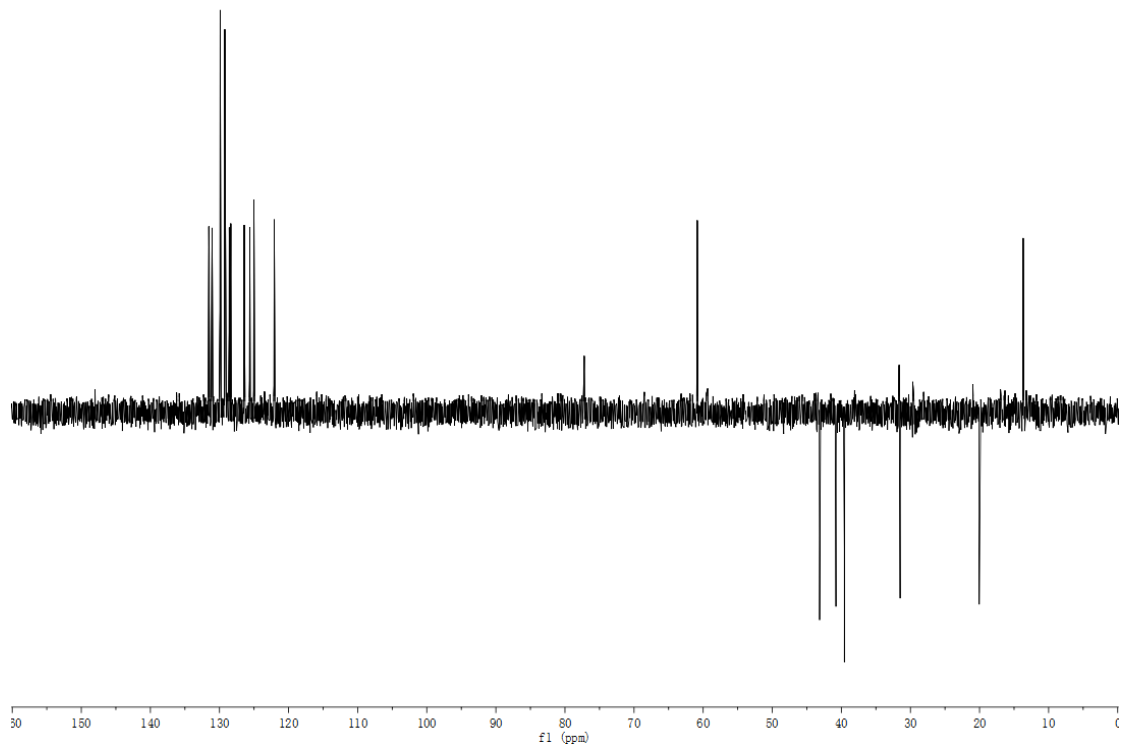

**N-butyl-2-(1-oxo-3,4-dihydrospiro[benzo[c]azepine-5,3'-indol]-2(1H)-yl)-2-phenylacetamide (30up)**

**<sup>1</sup>H NMR (400 MHz, CDCl<sub>3</sub>):**

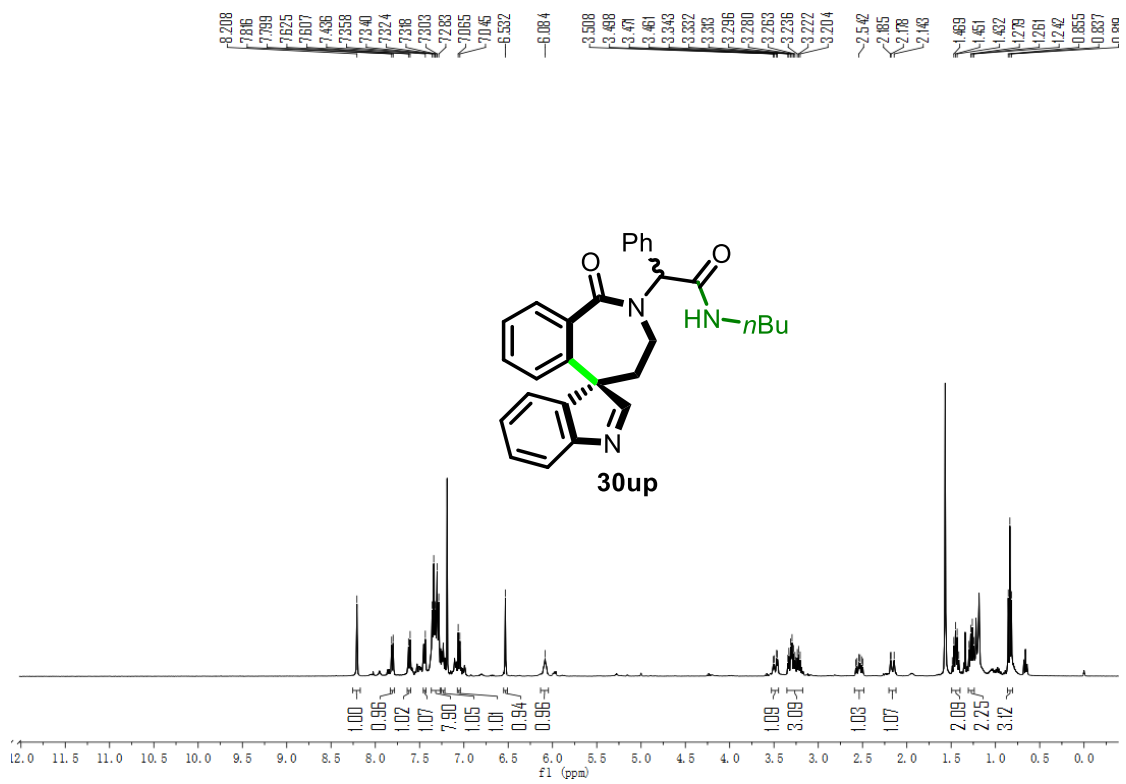

**<sup>13</sup>C NMR (100 MHz, CDCl<sub>3</sub>):**

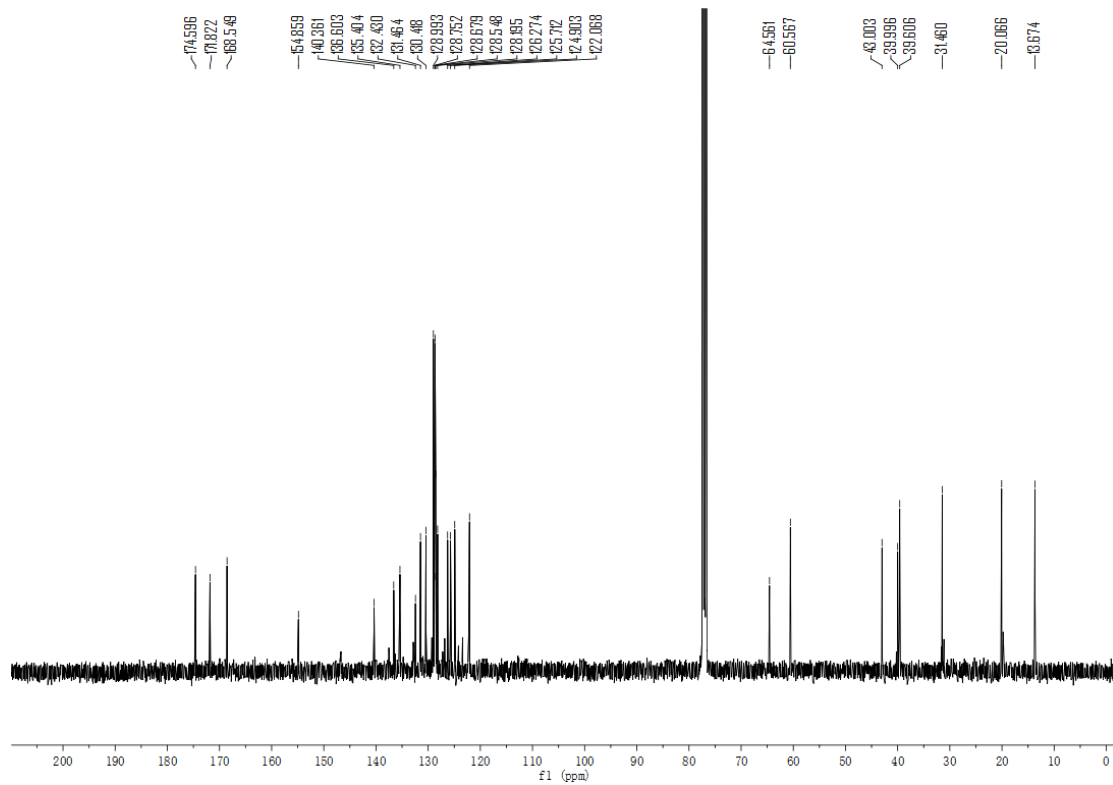

**DEPT**

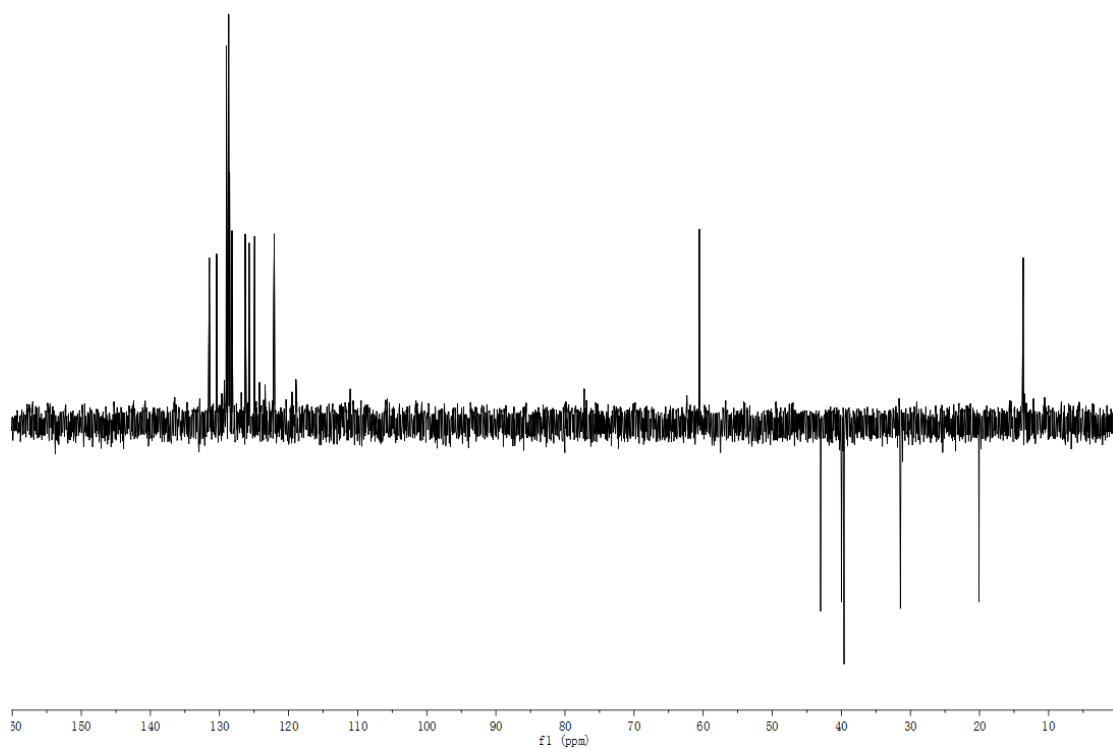

**30 crude**  $^1\text{H}$  NMR

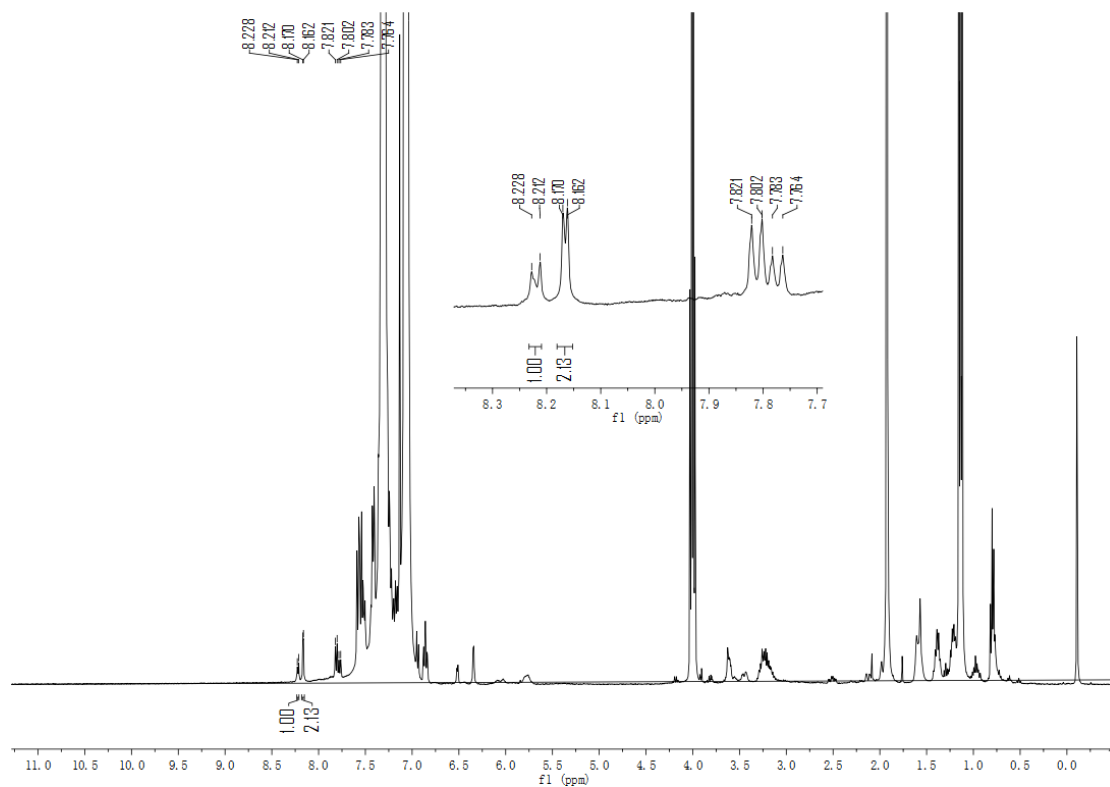

**2-(1-oxo-3,4-dihydrospiro[benzo[c]azepine-5,3'-indol]-2(1H)-yl)-2-phenyl-N-(2,4,4-trimethylpenta-2-yl)acetamide (31down)**

**<sup>1</sup>H NMR (400 MHz, CDCl<sub>3</sub>):**

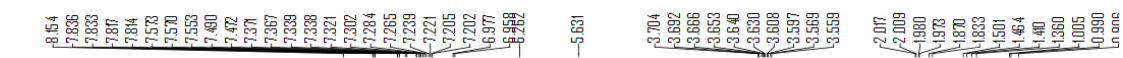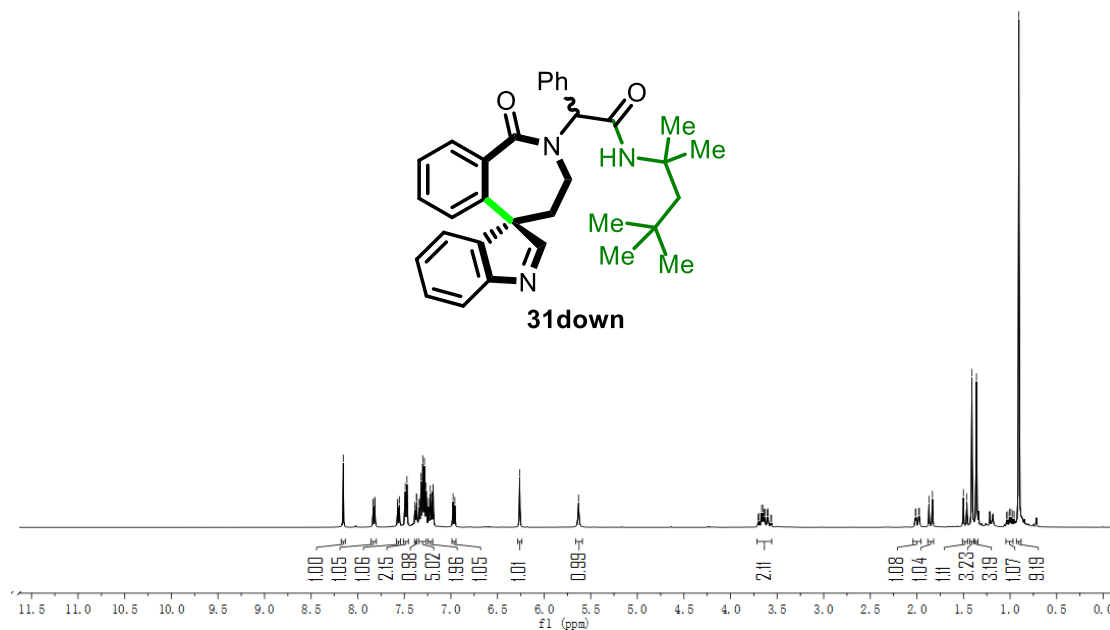

**<sup>13</sup>C NMR (100 MHz, CDCl<sub>3</sub>):**

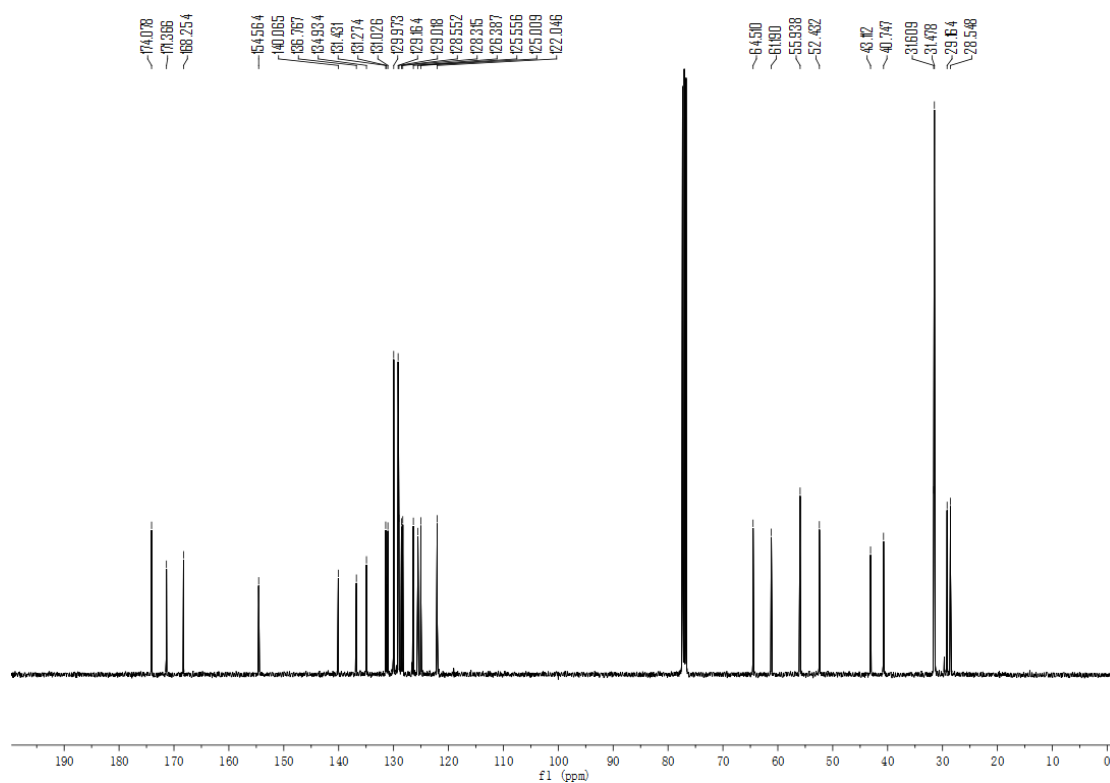

DEPT

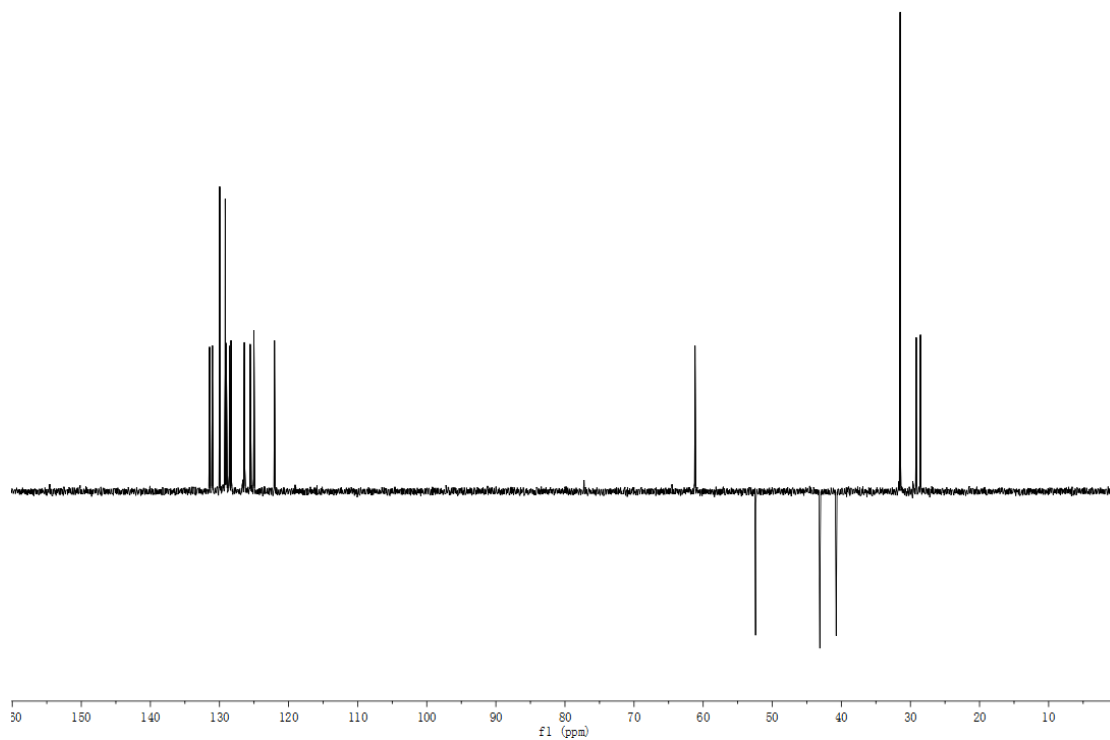

2-(1-oxo-3,4-dihydrospiro[benzo[c]azepine-5,3'-indol]-2(1H)-yl)-2-phenyl-N-(2,4,4-trimethylpentan-2-yl)acetamide (31up)

<sup>1</sup>H NMR (400 MHz, CDCl<sub>3</sub>):

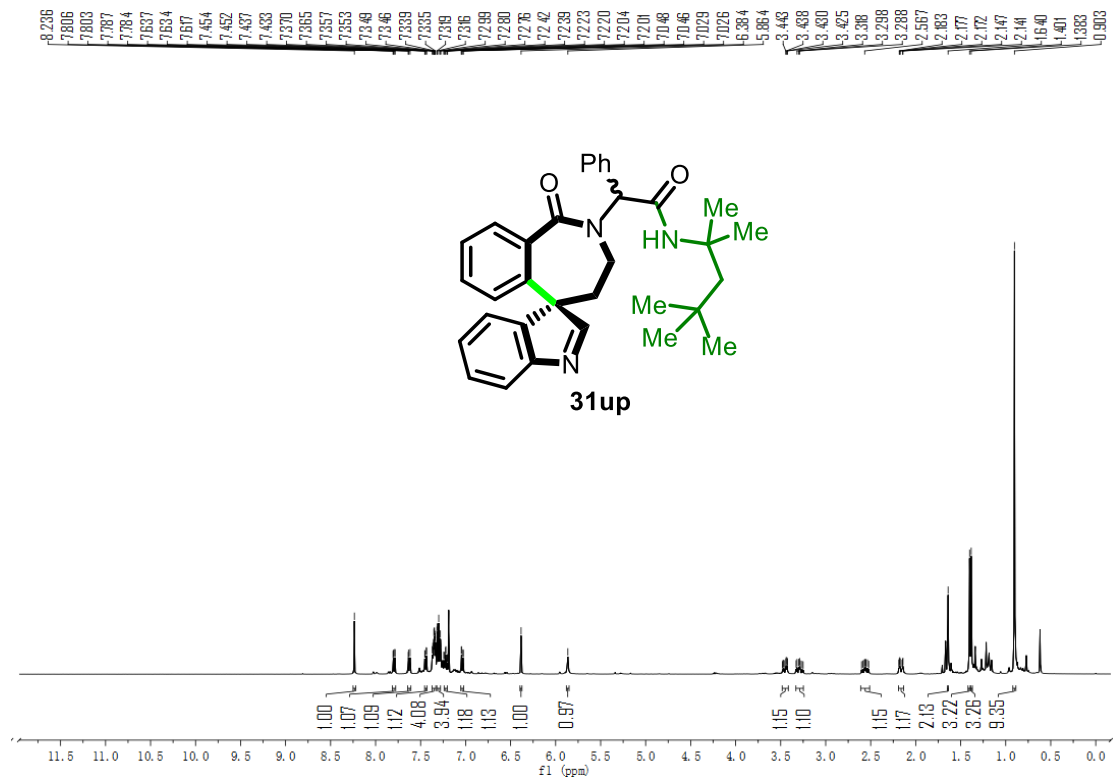

**<sup>13</sup>C NMR (100 MHz, CDCl<sub>3</sub>):**

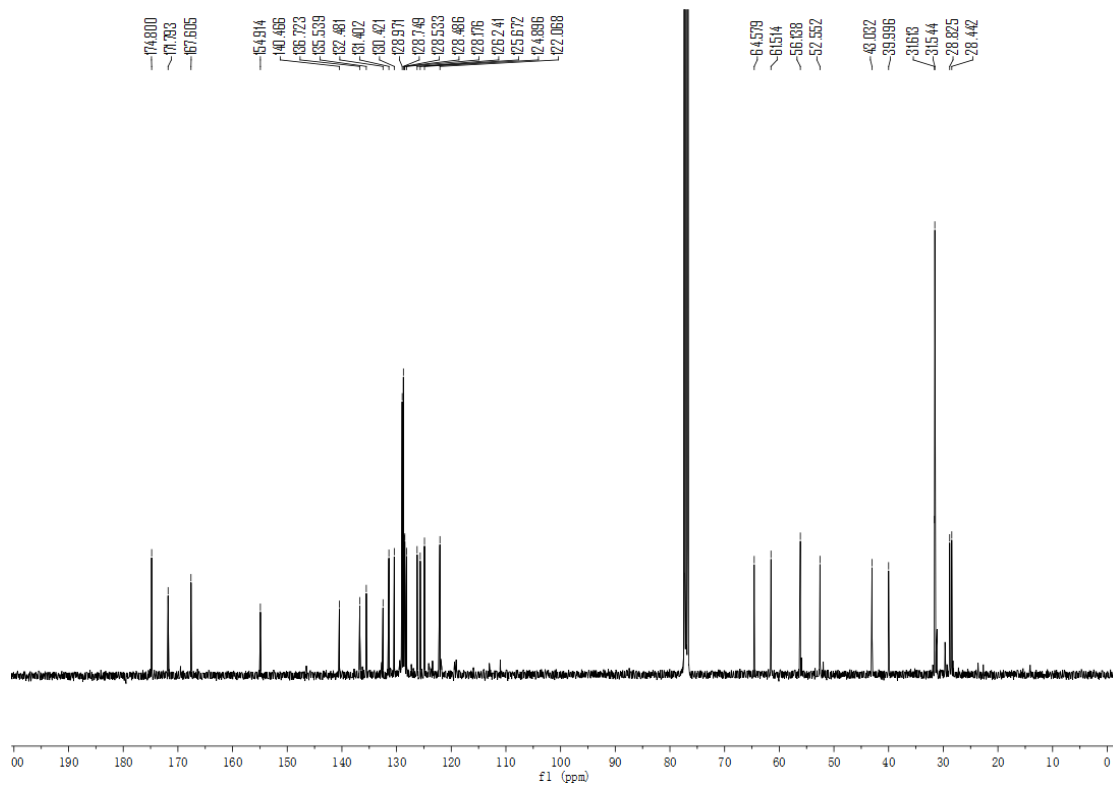

**DEPT**

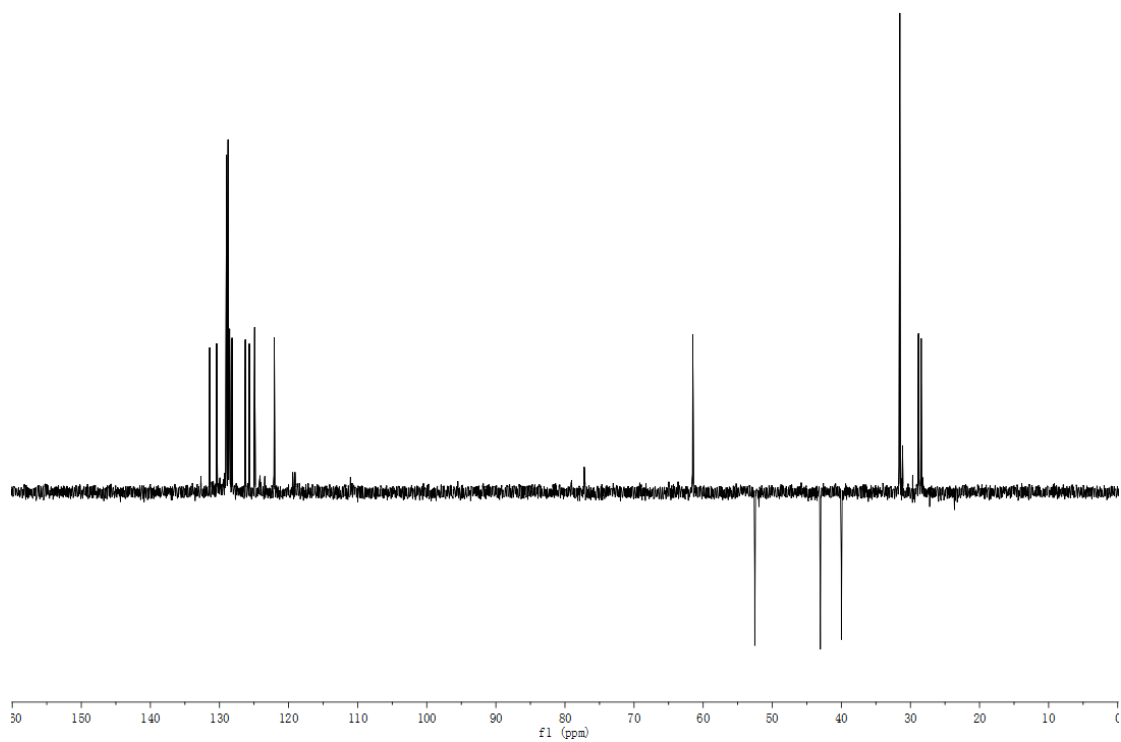

**31** crude <sup>1</sup>H NMR

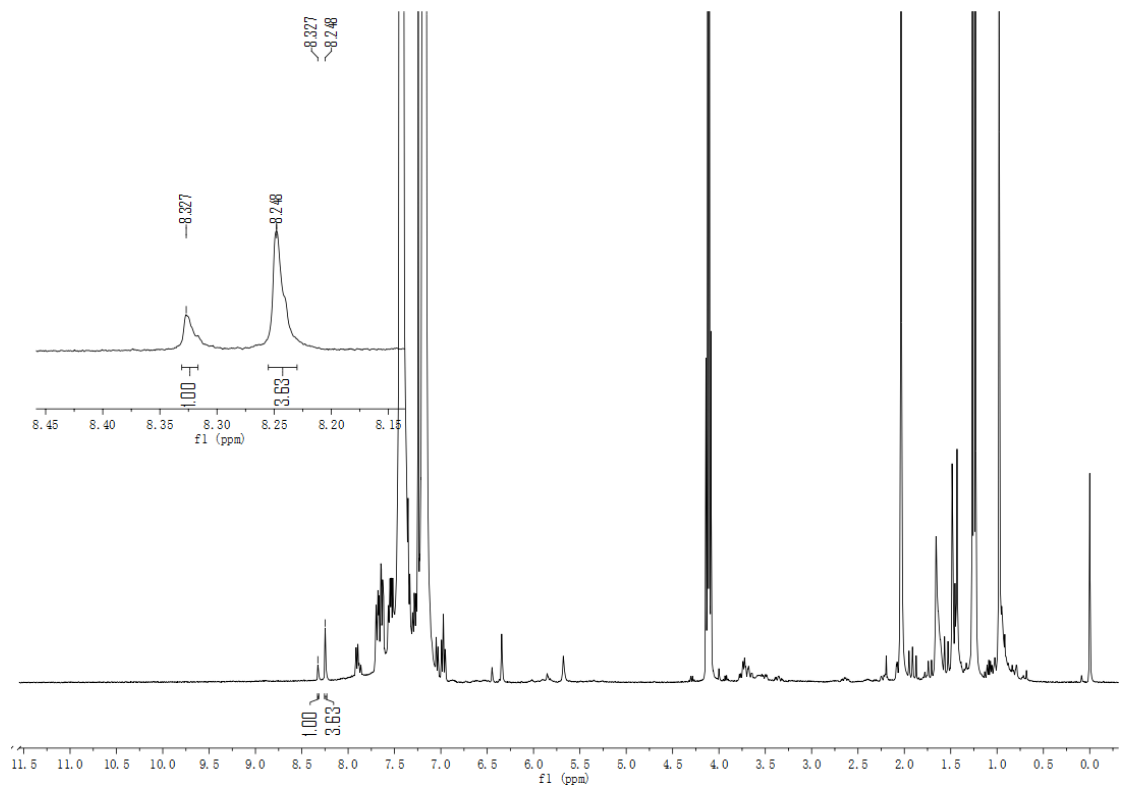

**N-cyclohexyl-2-(1-oxo-3,4-dihydrospiro[benzo[c]azepine-5,3'-indol]-2(1H)-yl)-2-phenylacetamide (32down)**

<sup>1</sup>H NMR (400 MHz, CDCl<sub>3</sub>):

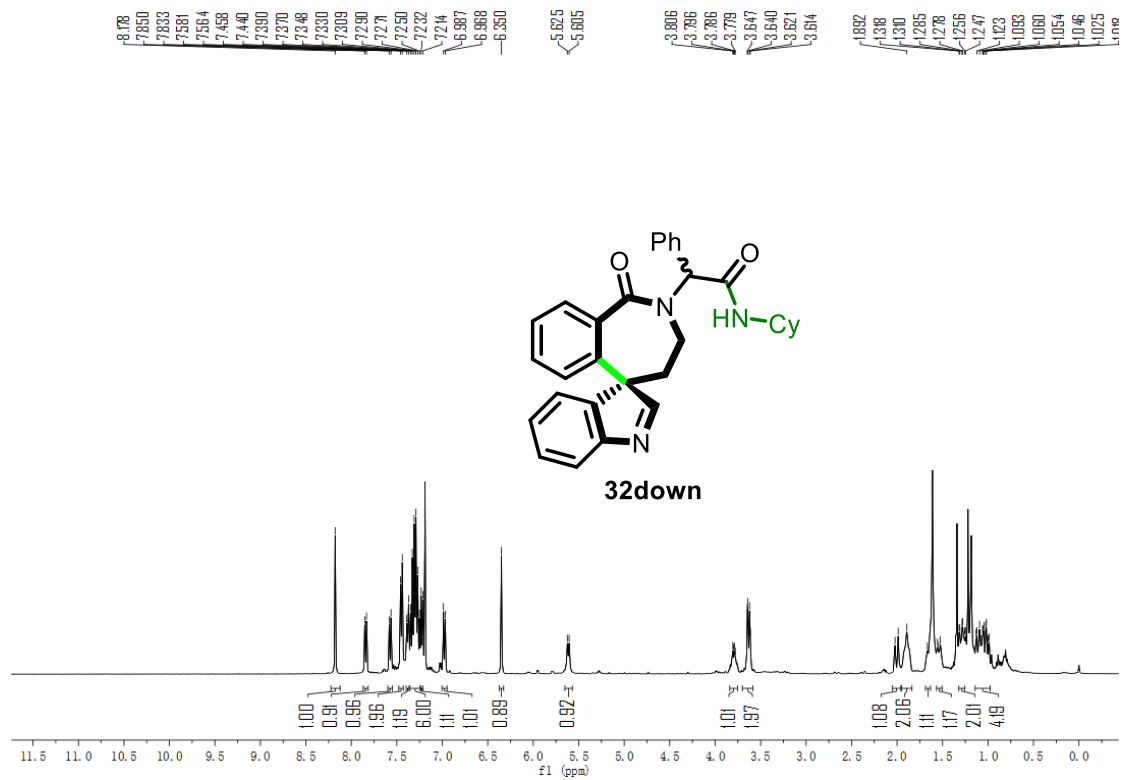

**<sup>13</sup>C NMR (100 MHz, CDCl<sub>3</sub>):**

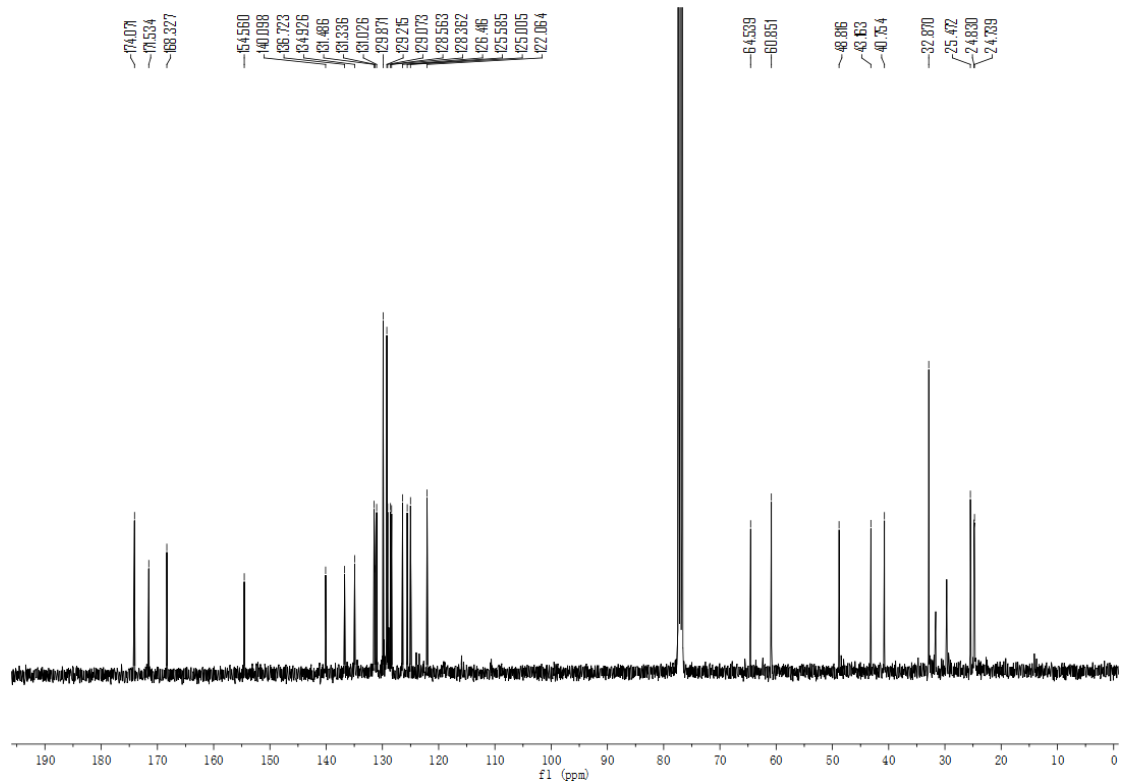

**DEPT**



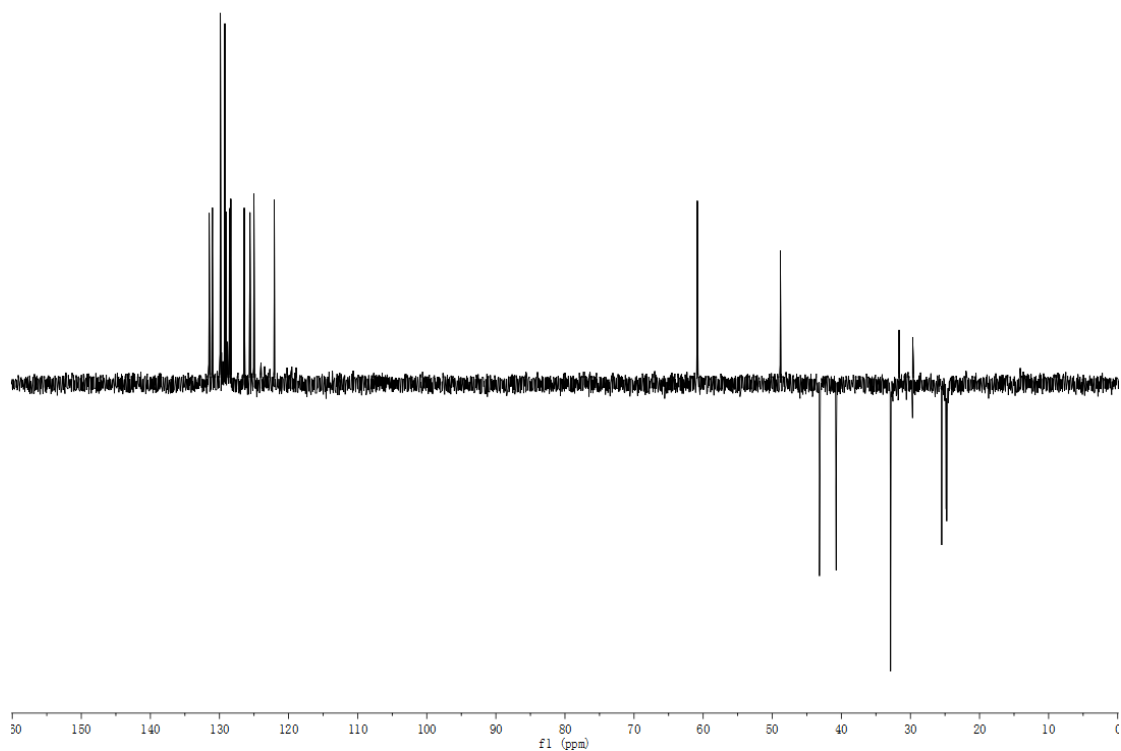

**N-cyclohexyl-2-(1-oxo-3,4-dihydrospiro[benzo[c]azepine-5,3'-indol]-2(1H)-yl)-2-phenylacetamide (32up)**

**<sup>1</sup>H NMR (400 MHz, CDCl<sub>3</sub>):**

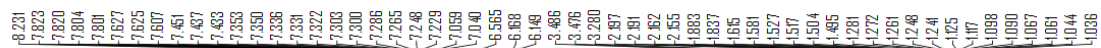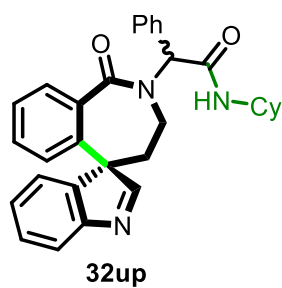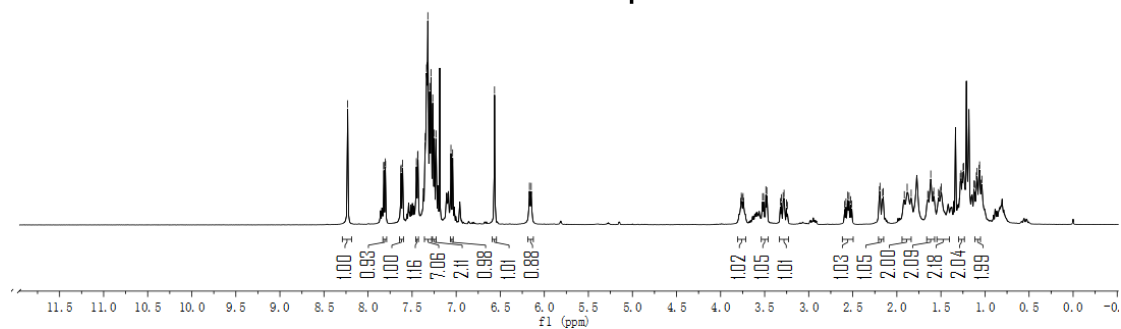

**<sup>13</sup>C NMR (100 MHz, CDCl<sub>3</sub>):**

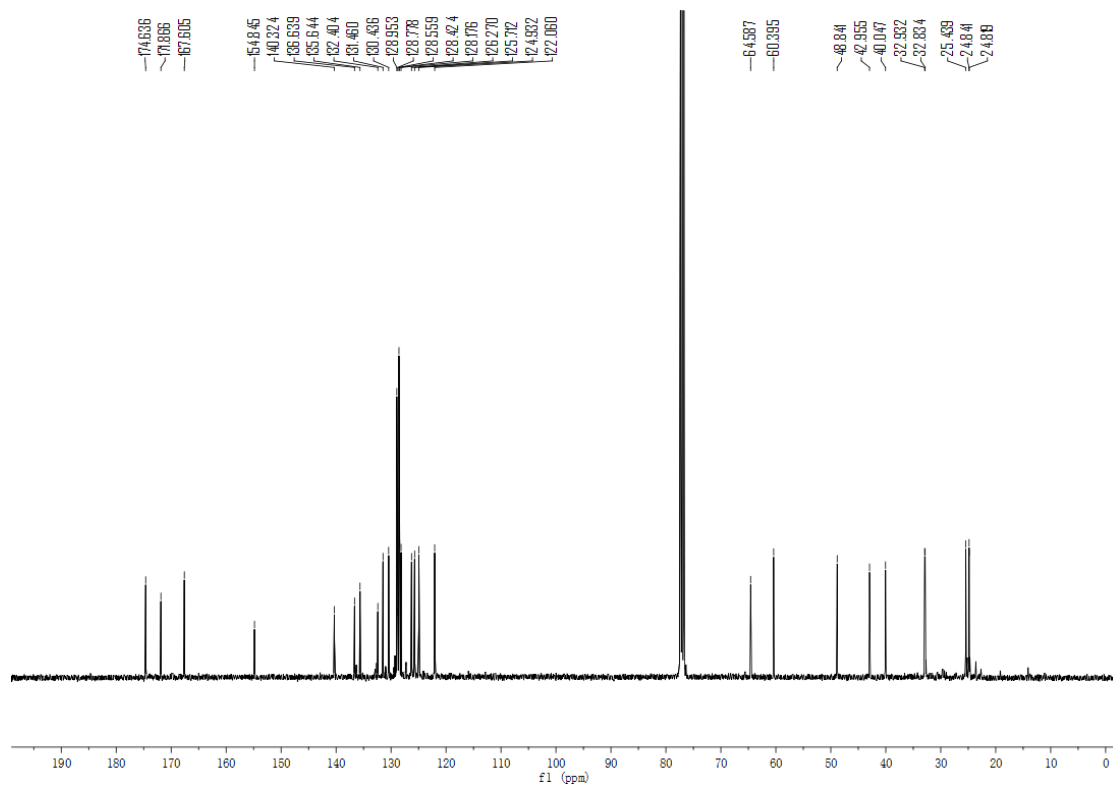

**DEPT**

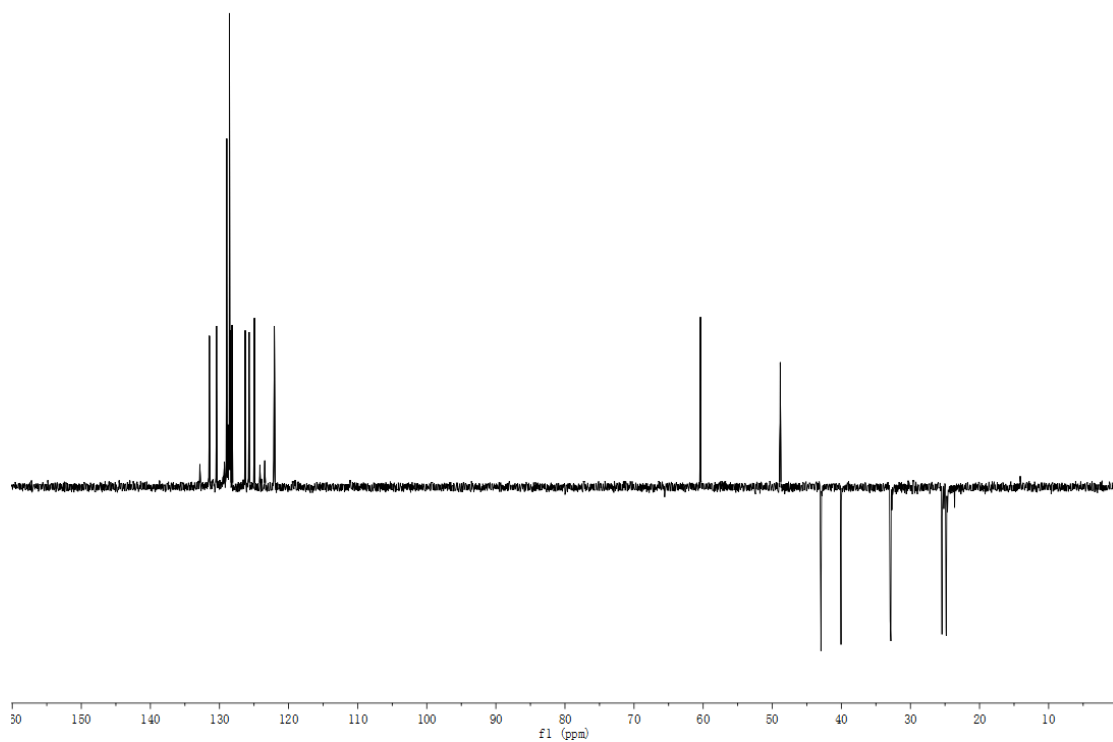

**32 crude <sup>1</sup>H NMR**



**N-benzyl-2-(1-oxo-3,4-dihydrospiro[benzo[c]azepine-5,3'-indol]-2(1H)-yl)-2-phenylacetamide (33up)**

**<sup>1</sup>H NMR (400 MHz, CDCl<sub>3</sub>):**

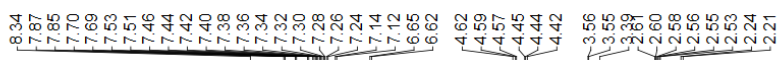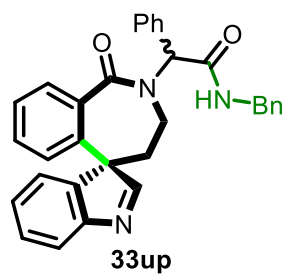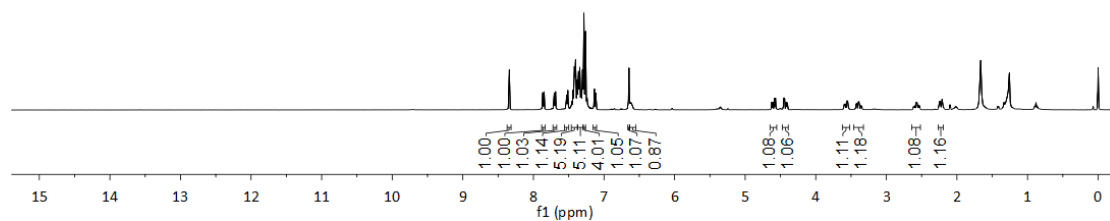

**<sup>13</sup>C NMR (100 MHz, CDCl<sub>3</sub>):**

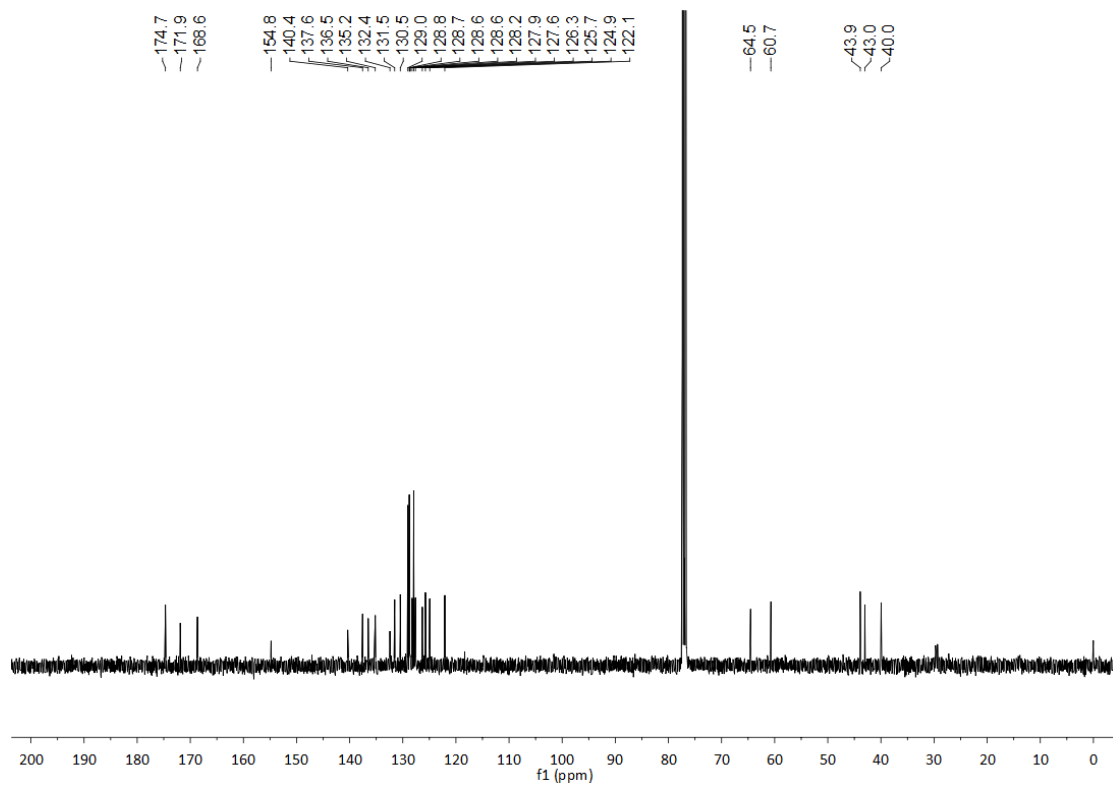

DEPT

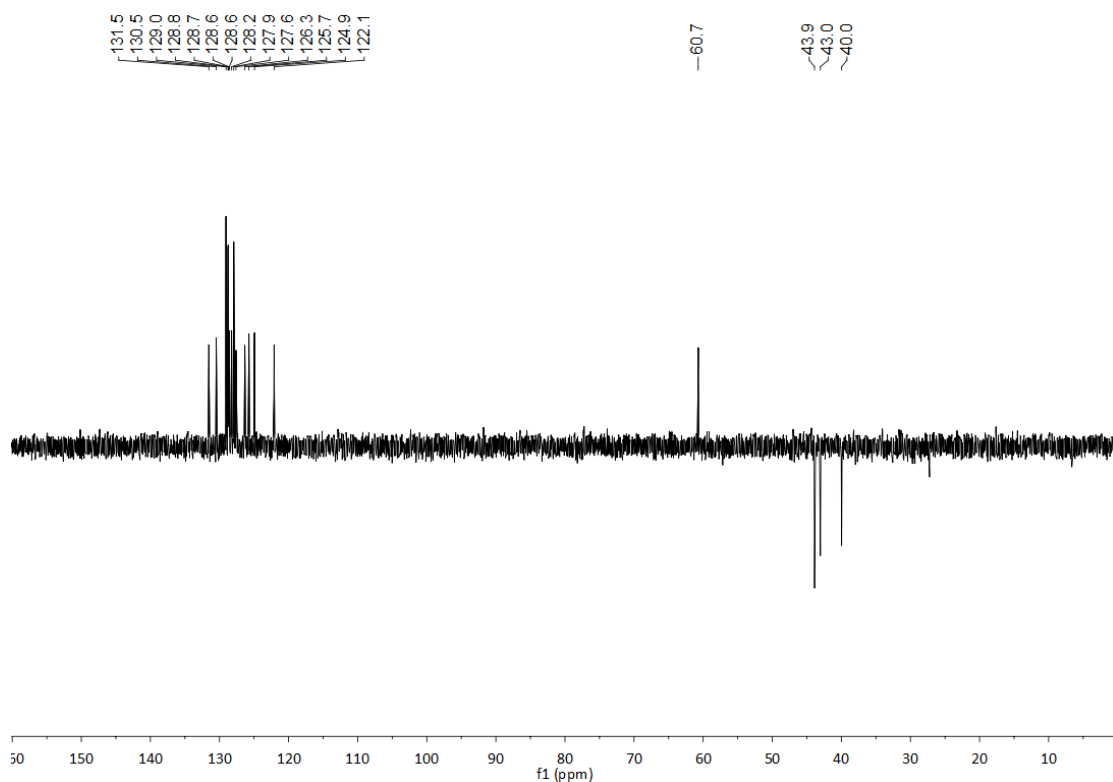

**N-(naphthalen-2-yl)-2-(1-oxo-3,4-dihydrospiro[benzo[c]azepine-5,3'-indol]-2(1H)-yl)-2-phenylacetamide (34down)**

**<sup>1</sup>H NMR (400 MHz, CDCl<sub>3</sub>):**

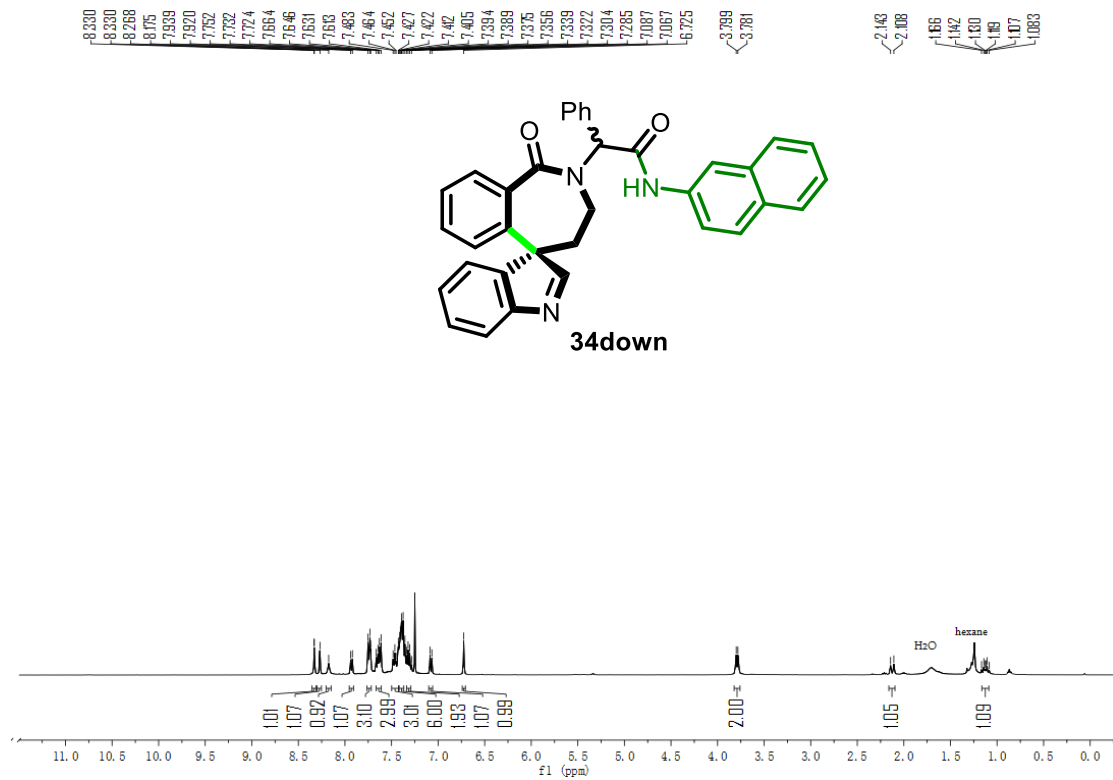

**<sup>13</sup>C NMR (100 MHz, CDCl<sub>3</sub>):**

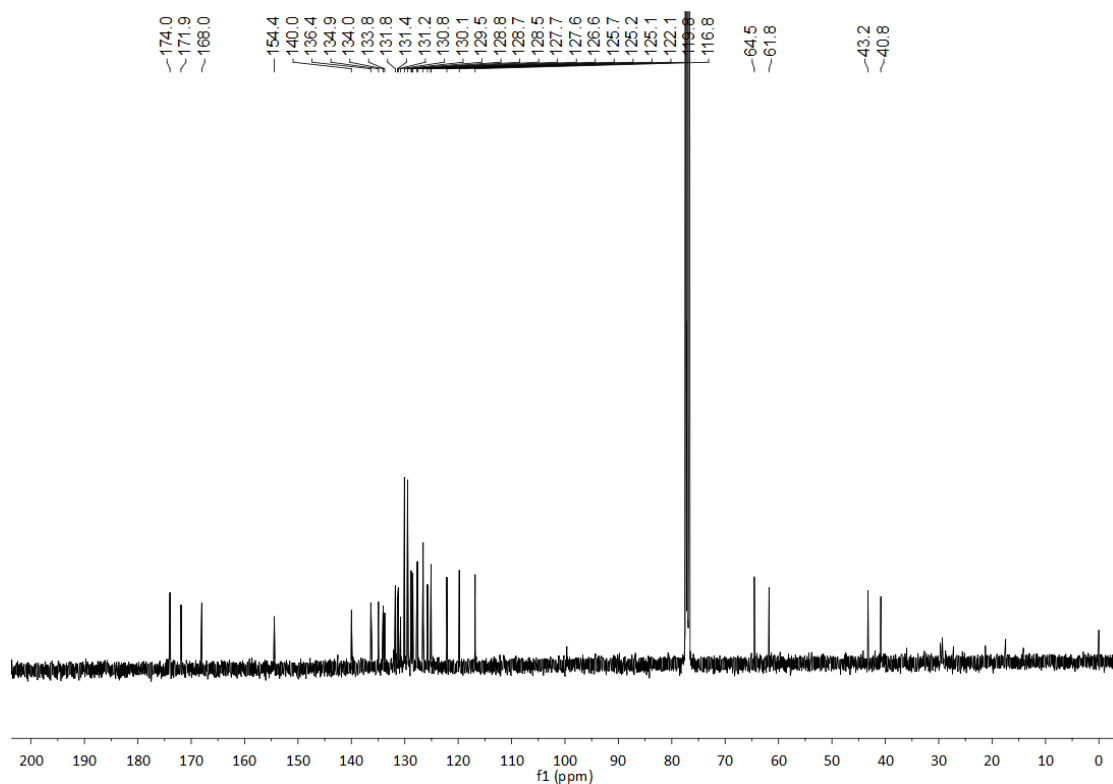

**DEPT**

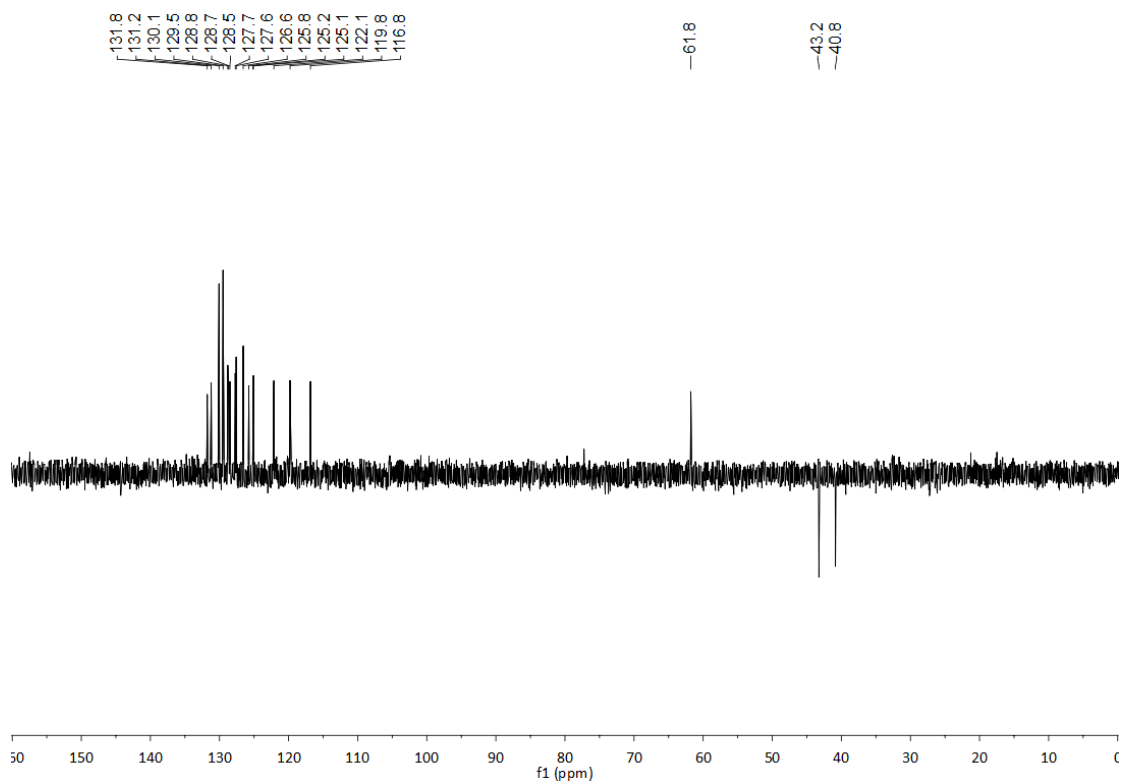

**N-(naphthalen-2-yl)-2-(1-oxo-3,4-dihydrospiro[benzo[c]azepine-5,3'-indol]-2(1H)-yl)-2-phenylacetamide (34up)**

**<sup>1</sup>H NMR (400 MHz, CDCl<sub>3</sub>):**

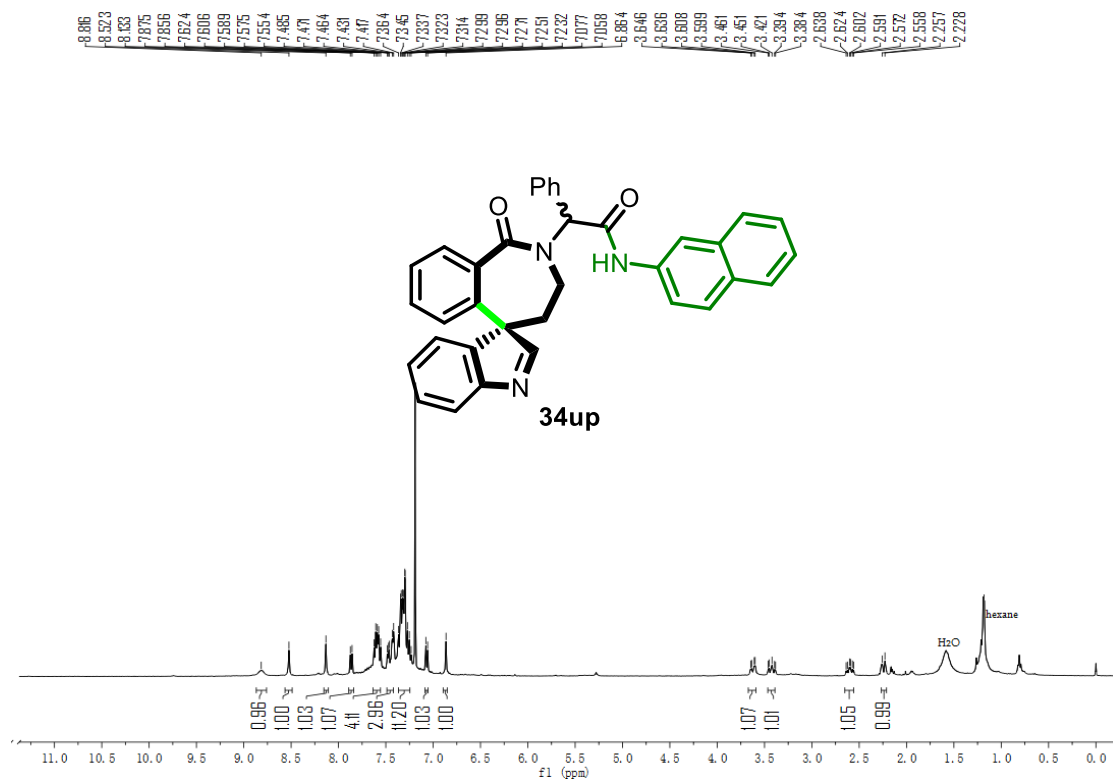

**<sup>13</sup>C NMR (100 MHz, CDCl<sub>3</sub>):**

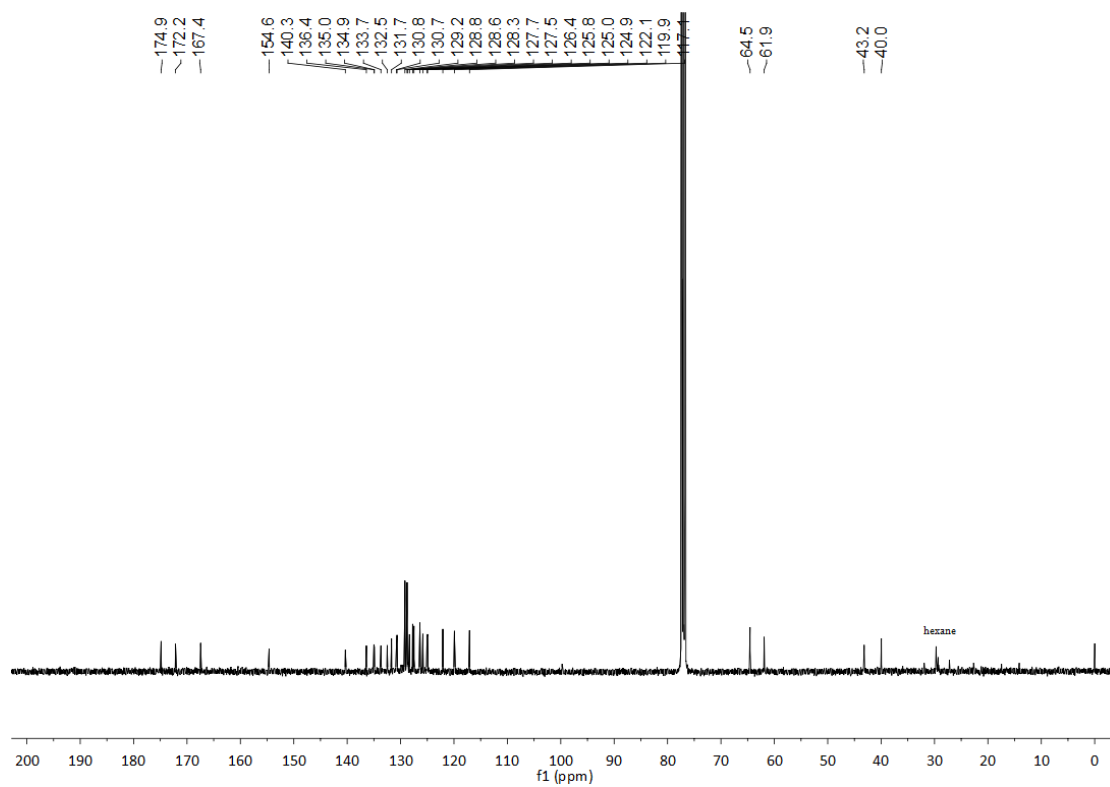

**DEPT**

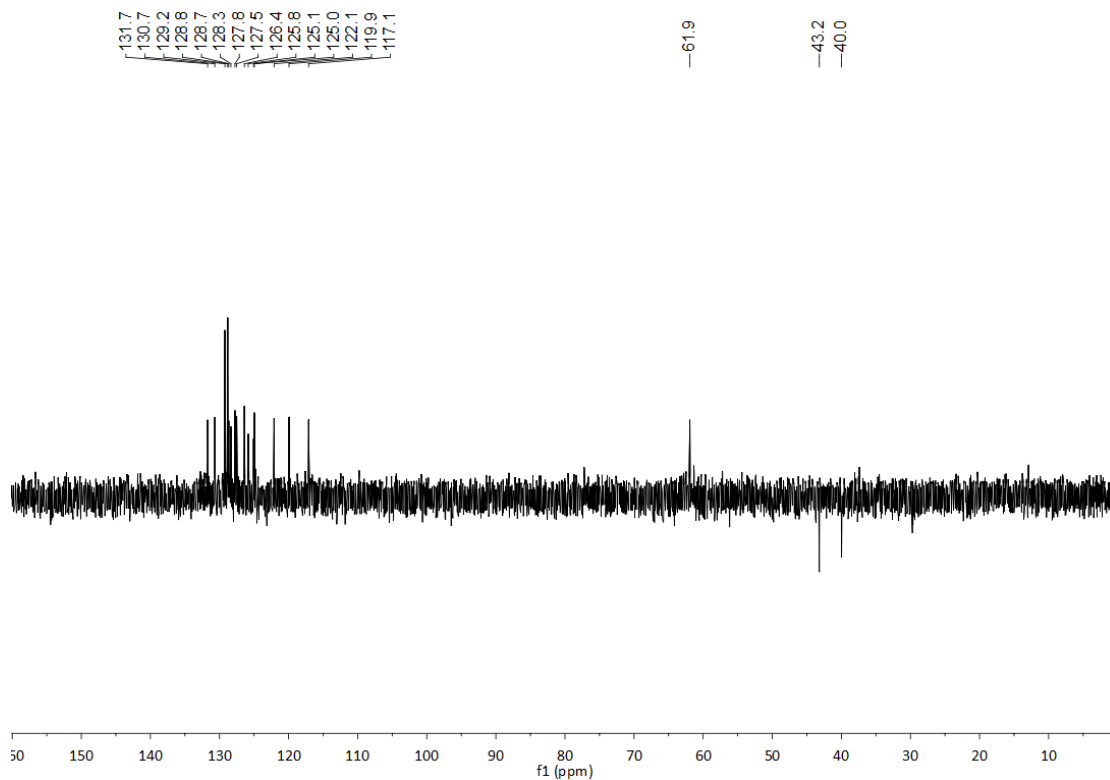

**34** crude  $^1\text{H}$  NMR

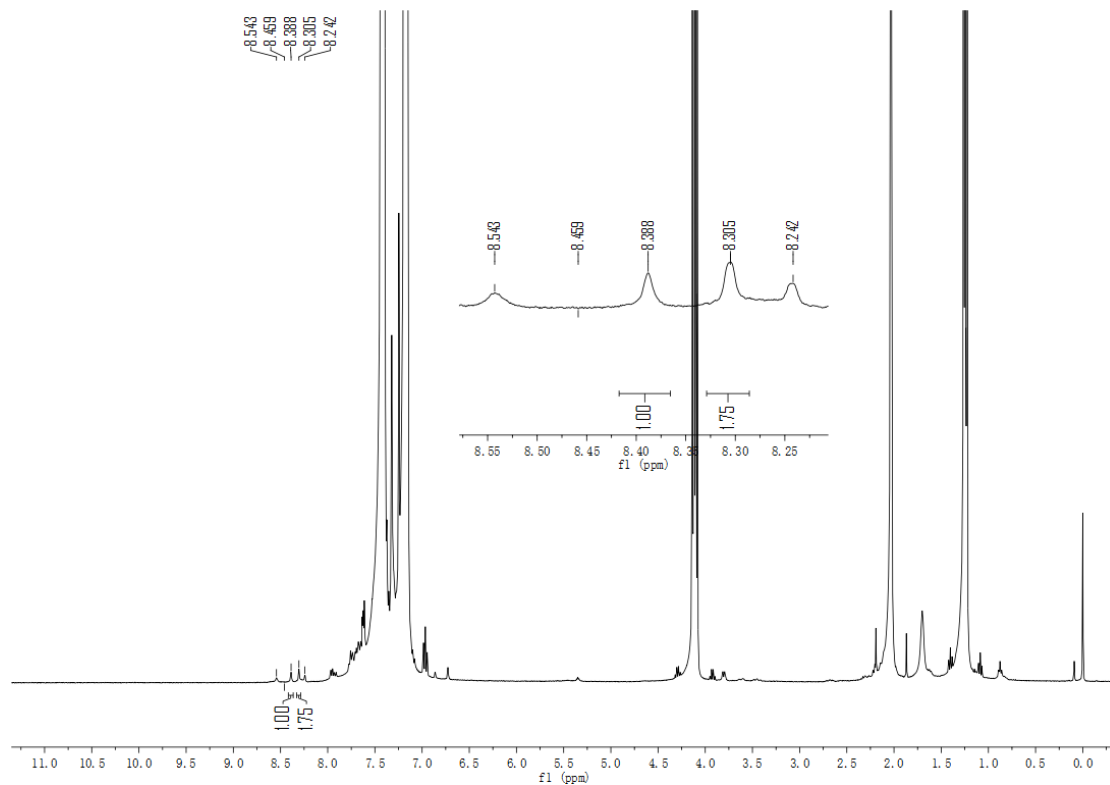

2'-(2-(1H-indol-3-yl)ethyl)-1-(tert-butyl)spiro[indoline-3,1'-isoindoline]-2,3'-dione (36)

<sup>1</sup>H NMR (400 MHz, CDCl<sub>3</sub>):

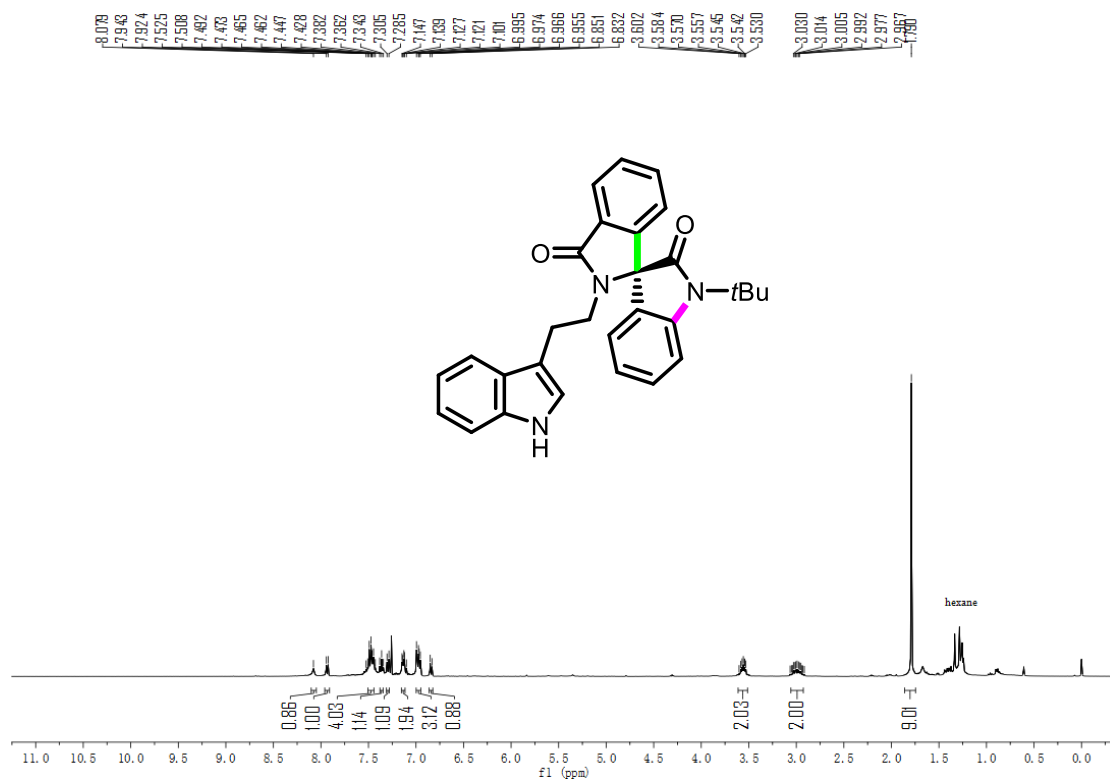

<sup>13</sup>C NMR (100 MHz, CDCl<sub>3</sub>):



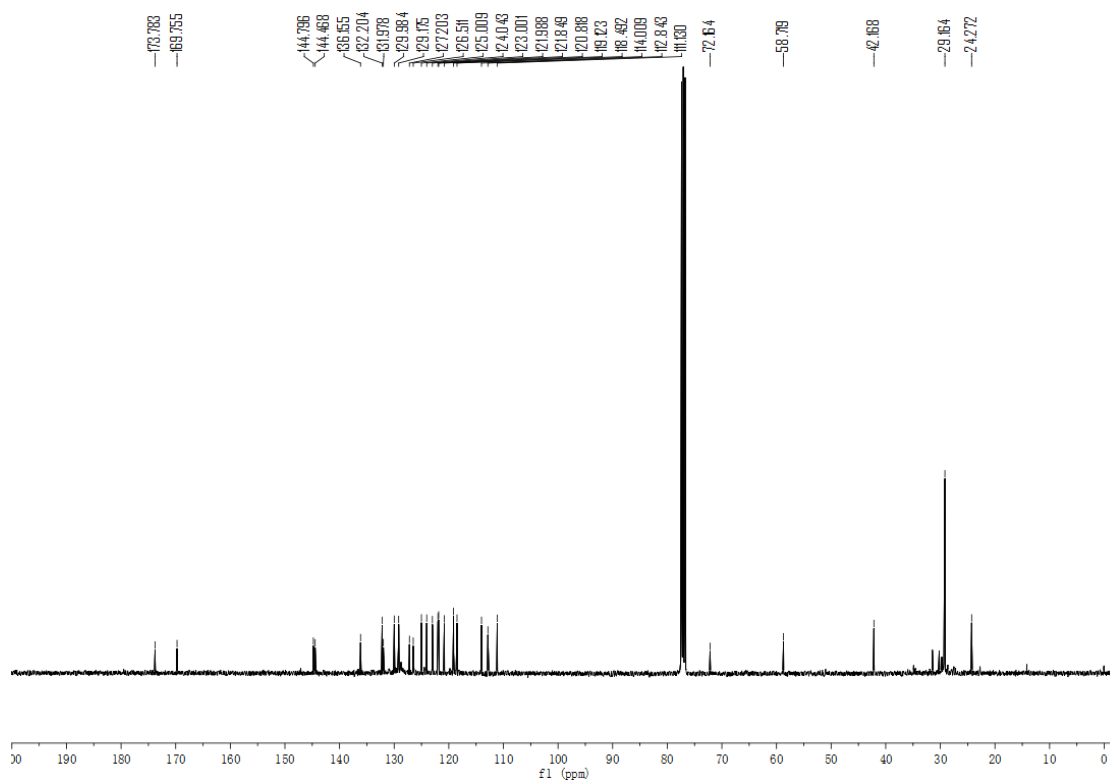

DEPT

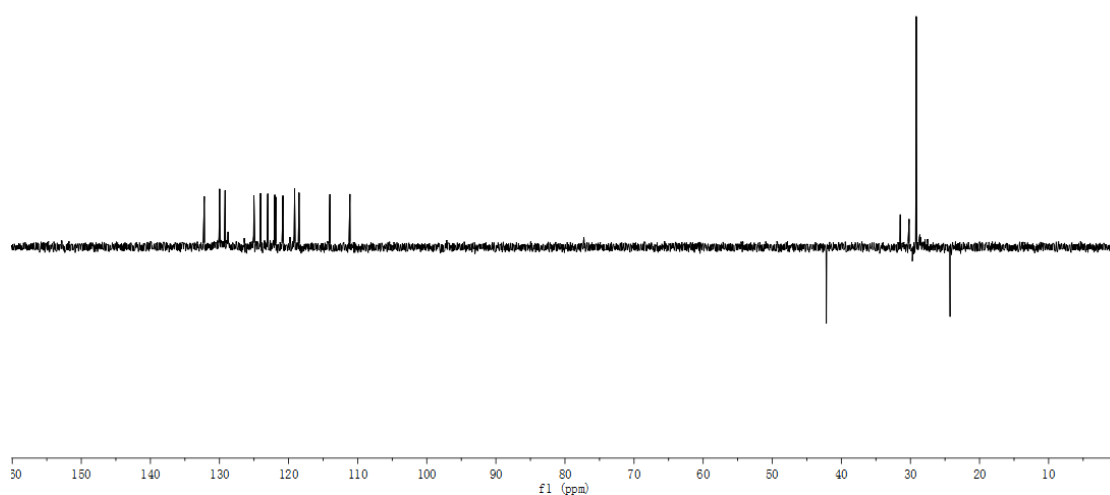

**N-(tert-butyl)-2-methyl-2-(5-oxo-5,7,8,13-tetrahydro-6H-benzo[6,7]azocino[5,4-b]indol-6-yl)propanamide (38)**

**<sup>1</sup>H NMR (400 MHz, CDCl<sub>3</sub>):**

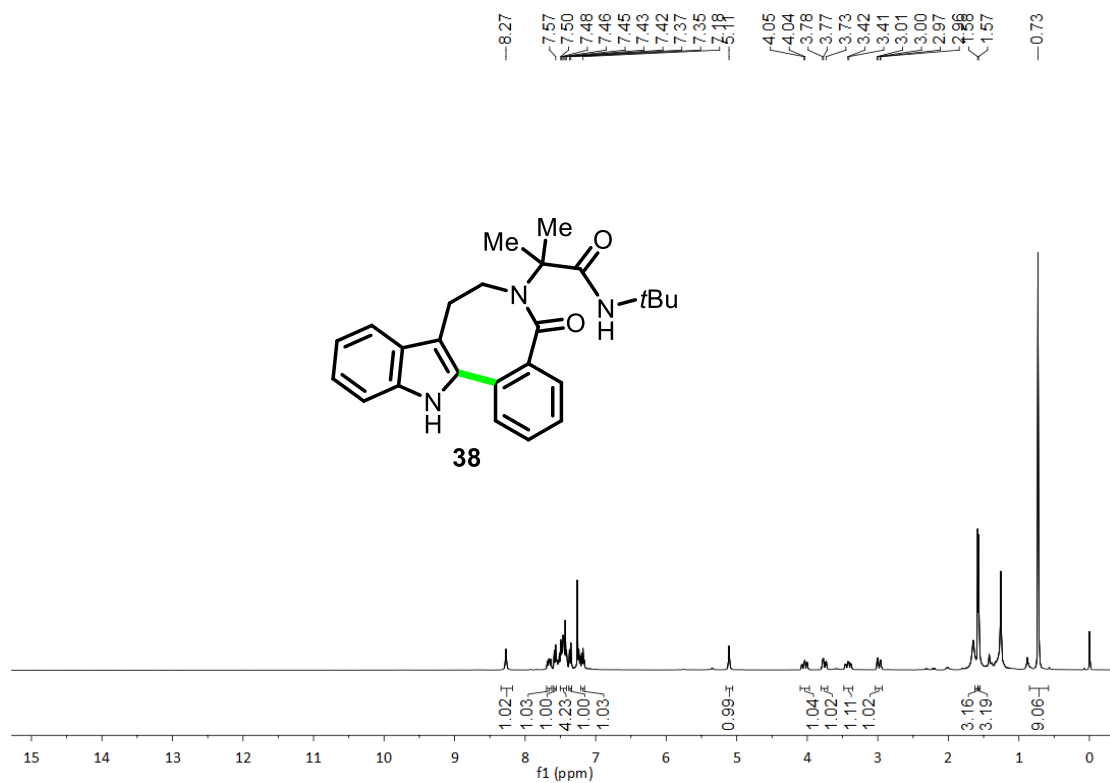

<sup>13</sup>C NMR (100 MHz, CDCl<sub>3</sub>):

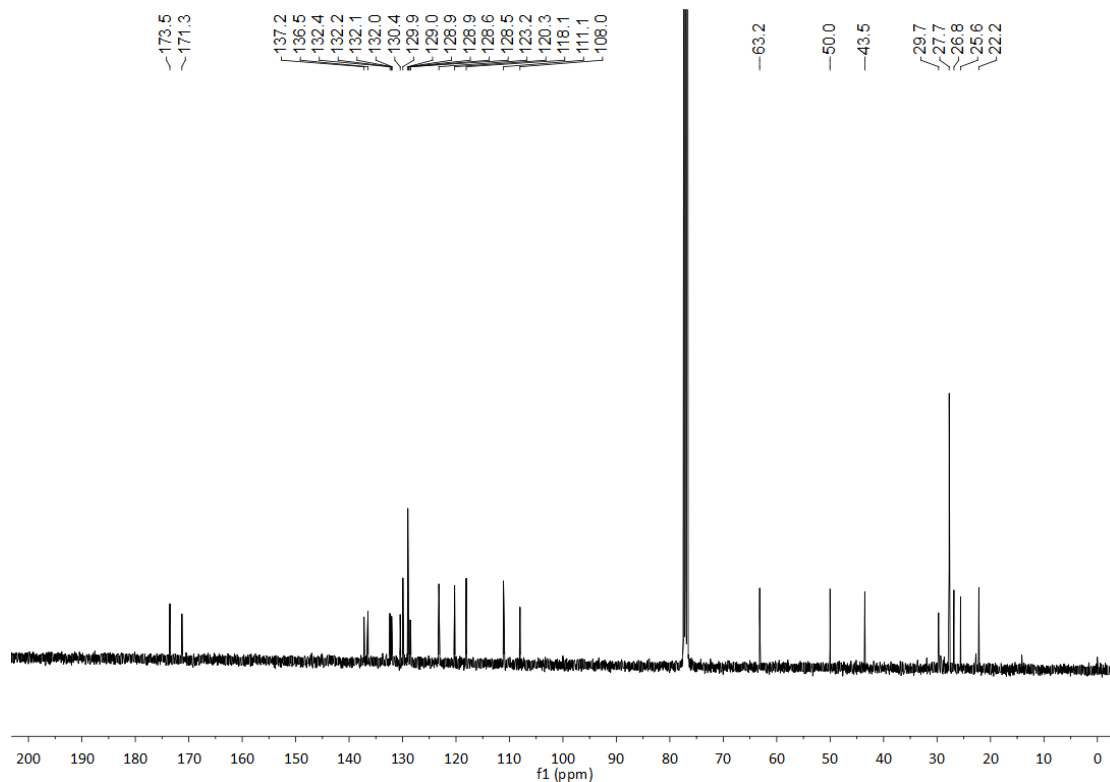

DEPT

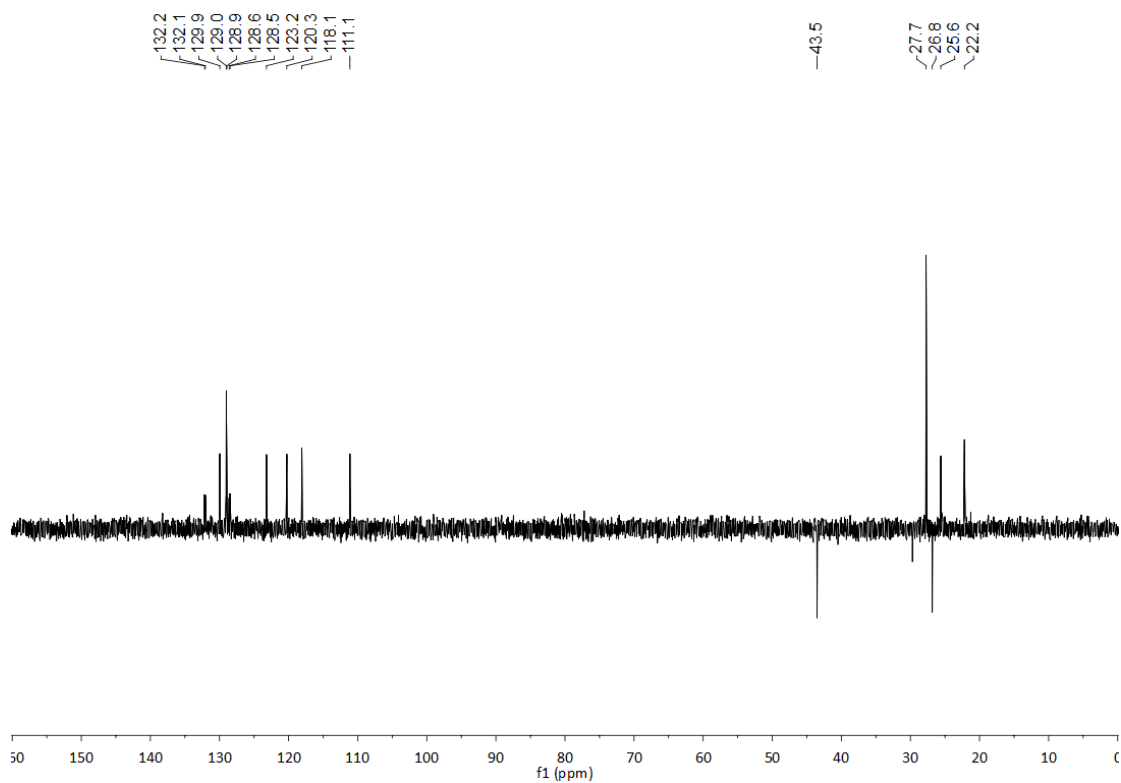

**2-(2-(1H-indol-3-yl)ethyl)-N-(tert-butyl)-1-(4-nitrophenyl)-3-oxoisindoline-1-carboxamide (39)**  
<sup>1</sup>H NMR (400 MHz, CDCl<sub>3</sub>):

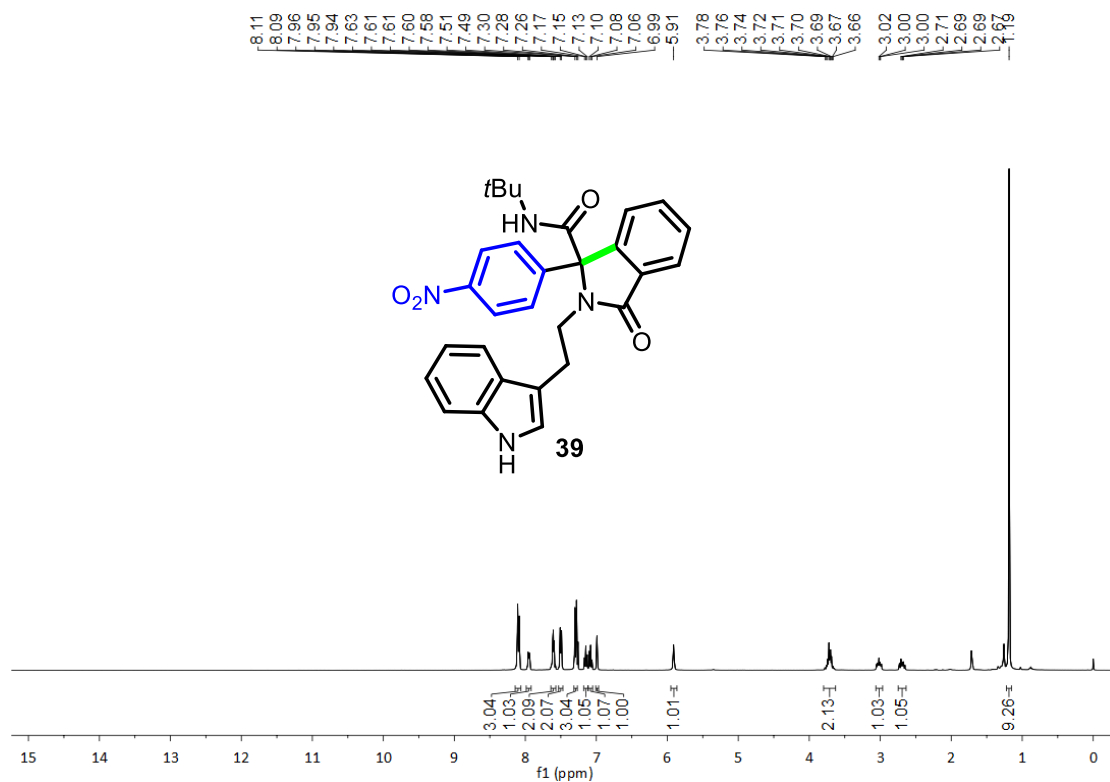

<sup>13</sup>C NMR (100 MHz, CDCl<sub>3</sub>):

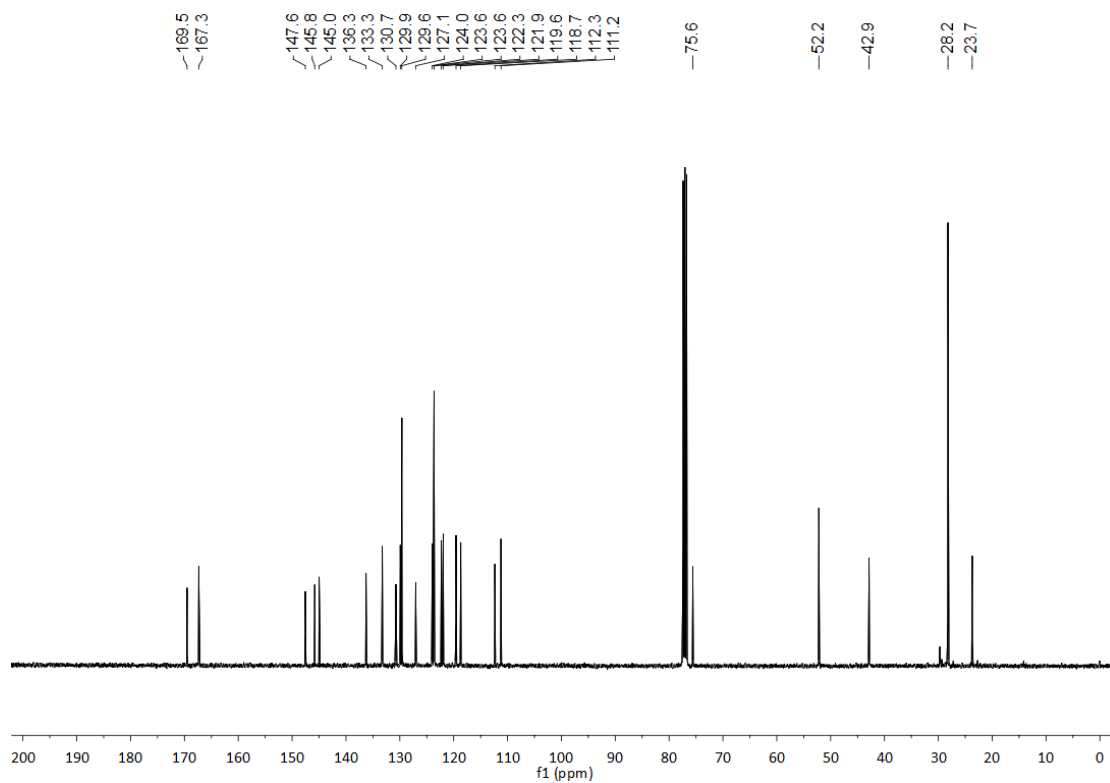

**DEPT**

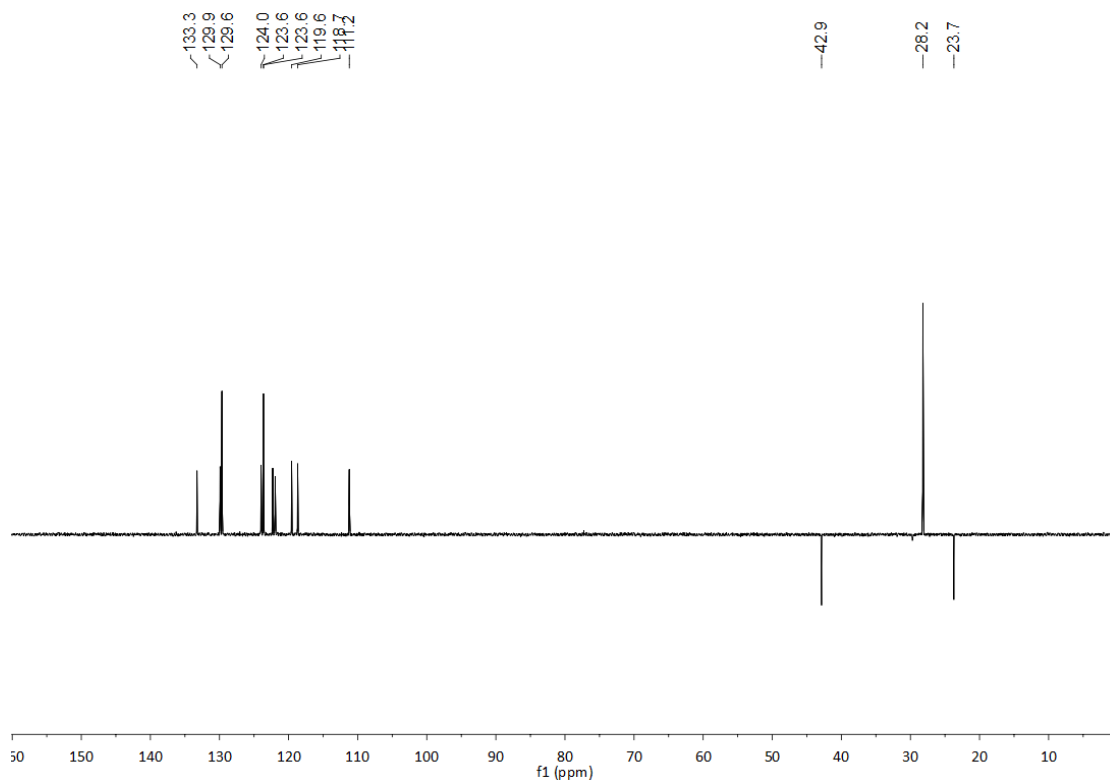

**2-(2-(1H-indol-3-yl)ethyl)-N-(tert-butyl)-1-(4-cyanophenyl)-3-oxoisindoline-1-carboxamide (40)**  
**<sup>1</sup>H NMR (400 MHz, CDCl<sub>3</sub>):**

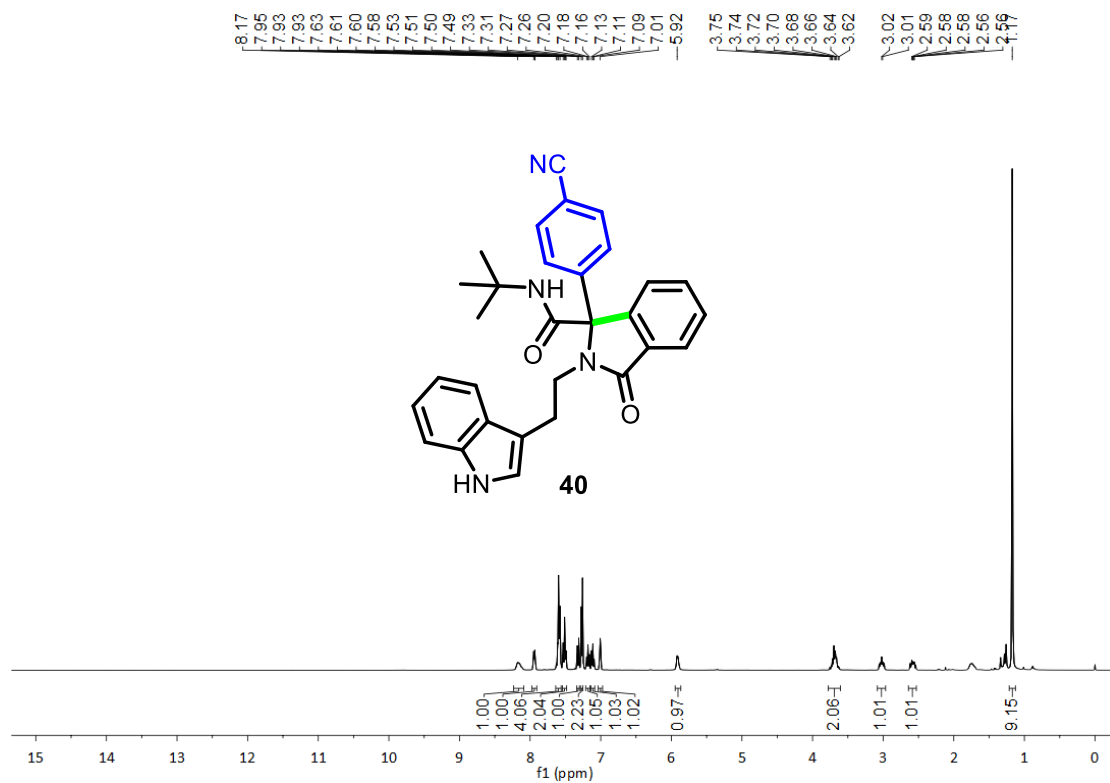

**<sup>13</sup>C NMR (100 MHz, CDCl<sub>3</sub>):**

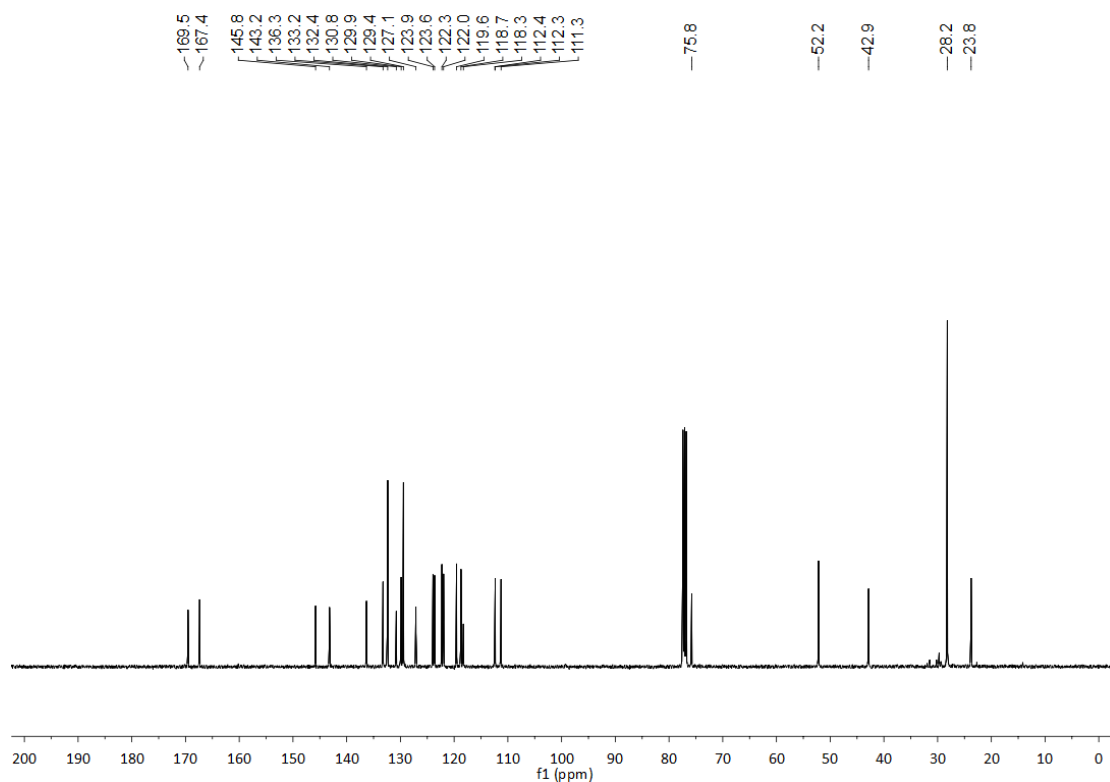

**DEPT**

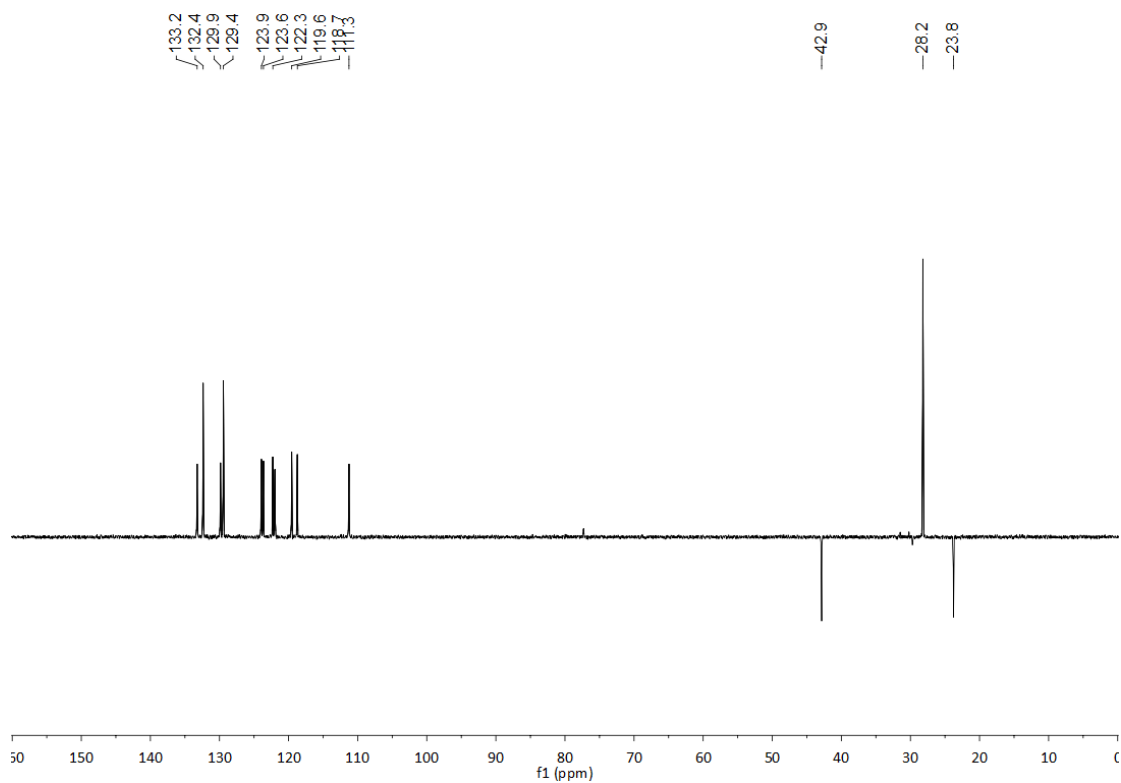

**2-(2-(1H-indol-3-yl)ethyl)-N-(tert-butyl)-3-oxo-1-(thiophen-2-yl)isoindoline-1-carboxamide (41)**

**<sup>1</sup>H NMR (400 MHz, DMSO-D<sub>6</sub>):**

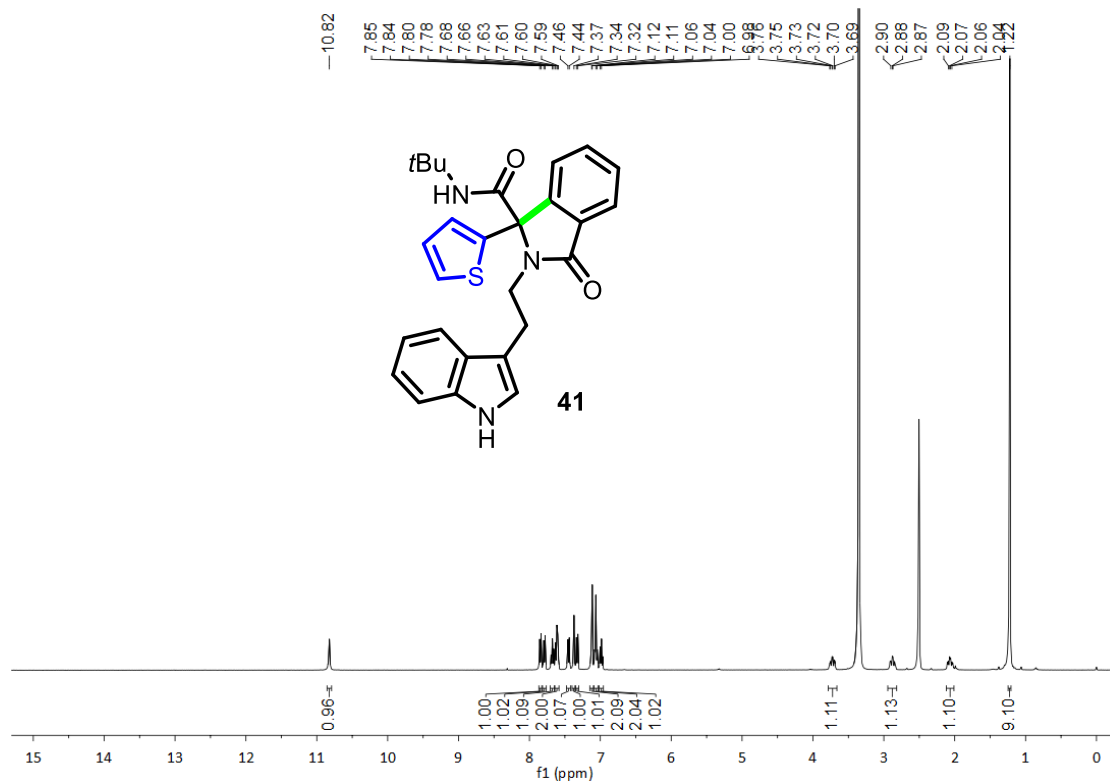

**<sup>13</sup>C NMR (100 MHz, DMSO-D<sub>6</sub>):**

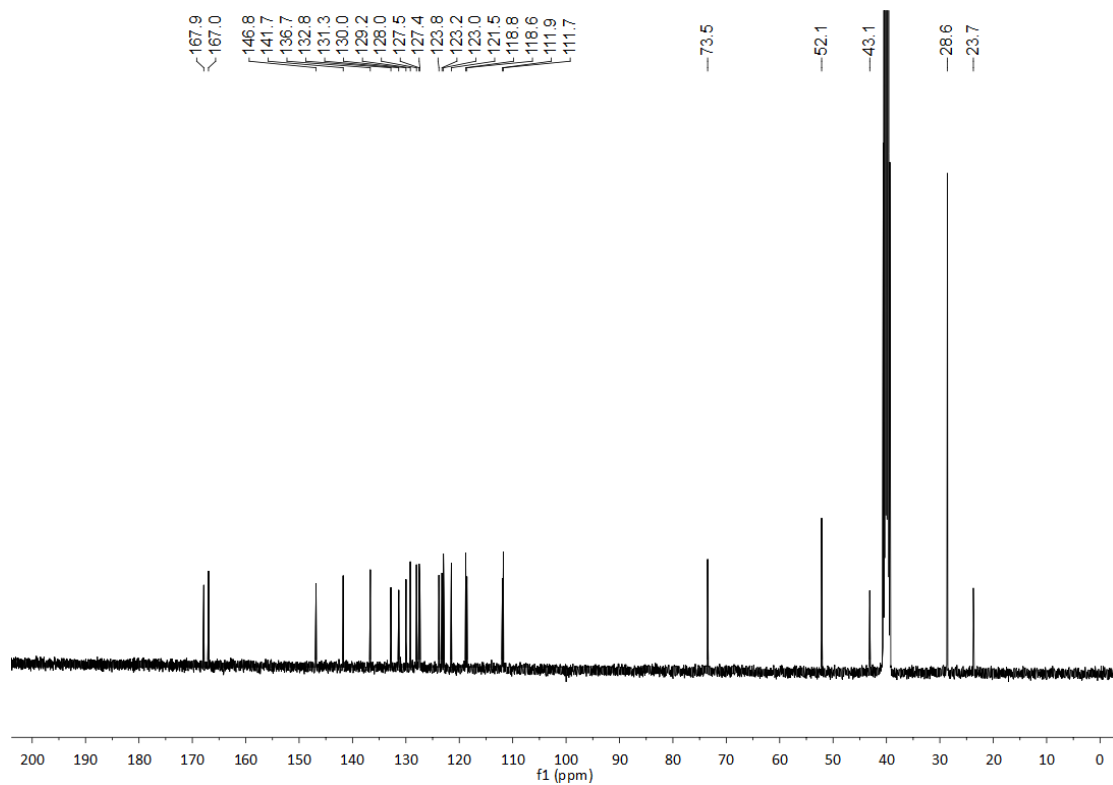

**DEPT**

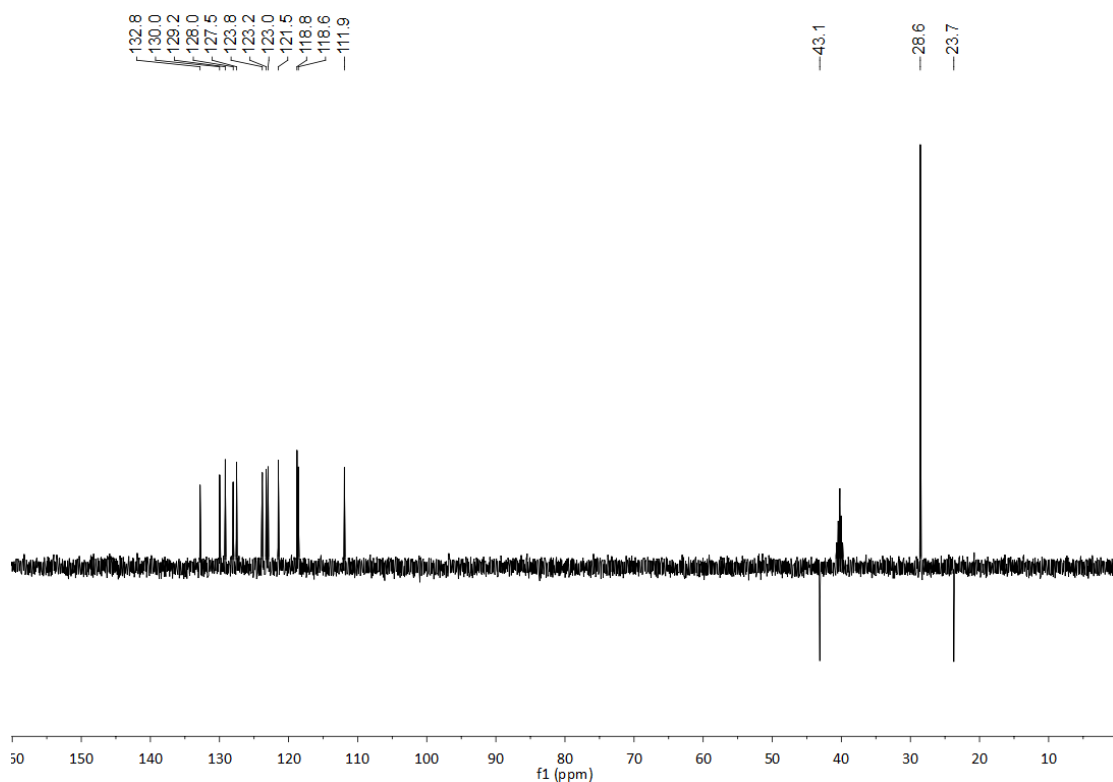

**2-(2-(1H-indol-3-yl)ethyl)-N-(tert-butyl)-3-oxo-1-(thiazol-2-yl)isoindoline-1-carboxamide (42)**  
**<sup>1</sup>H NMR (400 MHz, CDCl<sub>3</sub>):**

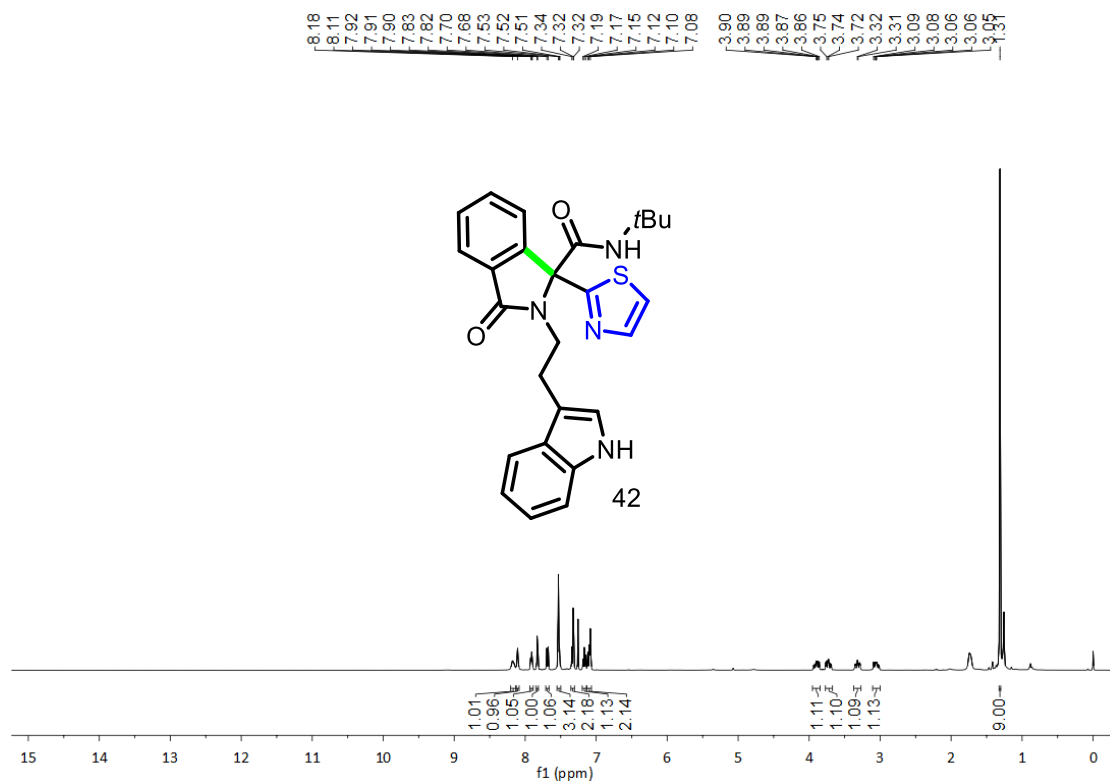

**<sup>13</sup>C NMR (100 MHz, CDCl<sub>3</sub>):**

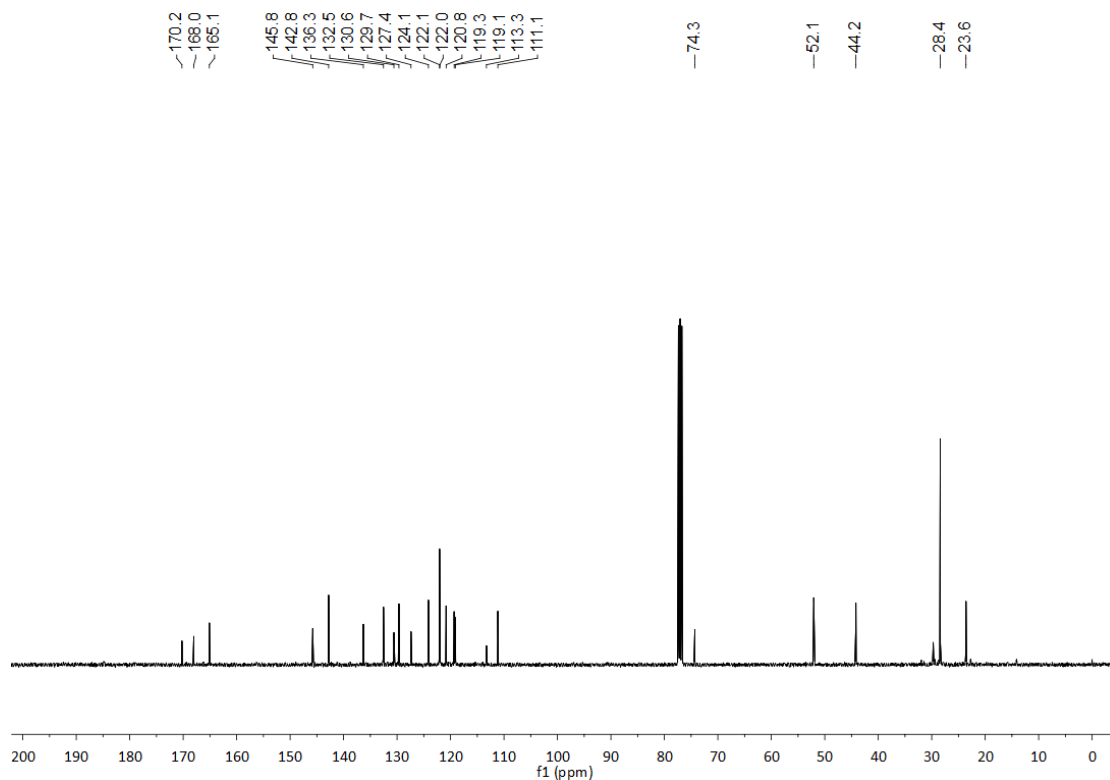

**DEPT**



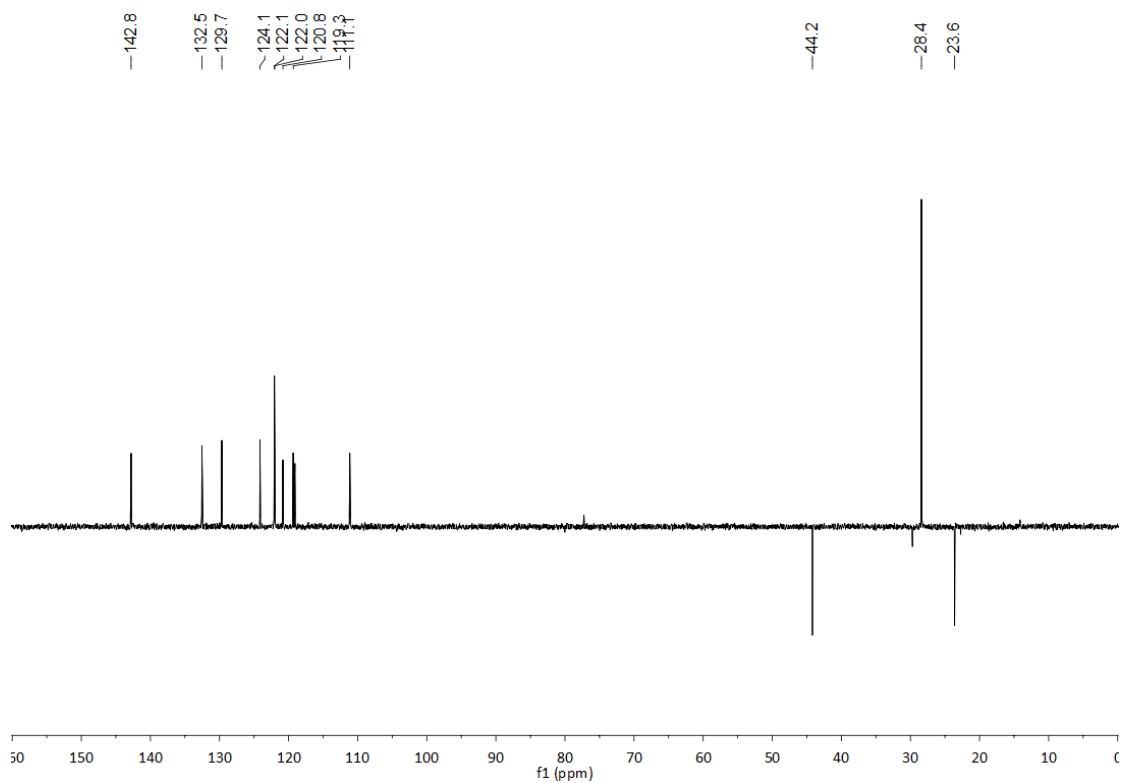

**N-(tert-butyl)-2-(1-methyl-5-oxo-5,7,8,13-tetrahydro-6H-benzo[6,7]azocino[5,4-b]indol-6-yl)-2-phenylacetamide (43)**

**<sup>1</sup>H NMR (400 MHz, CDCl<sub>3</sub>):**

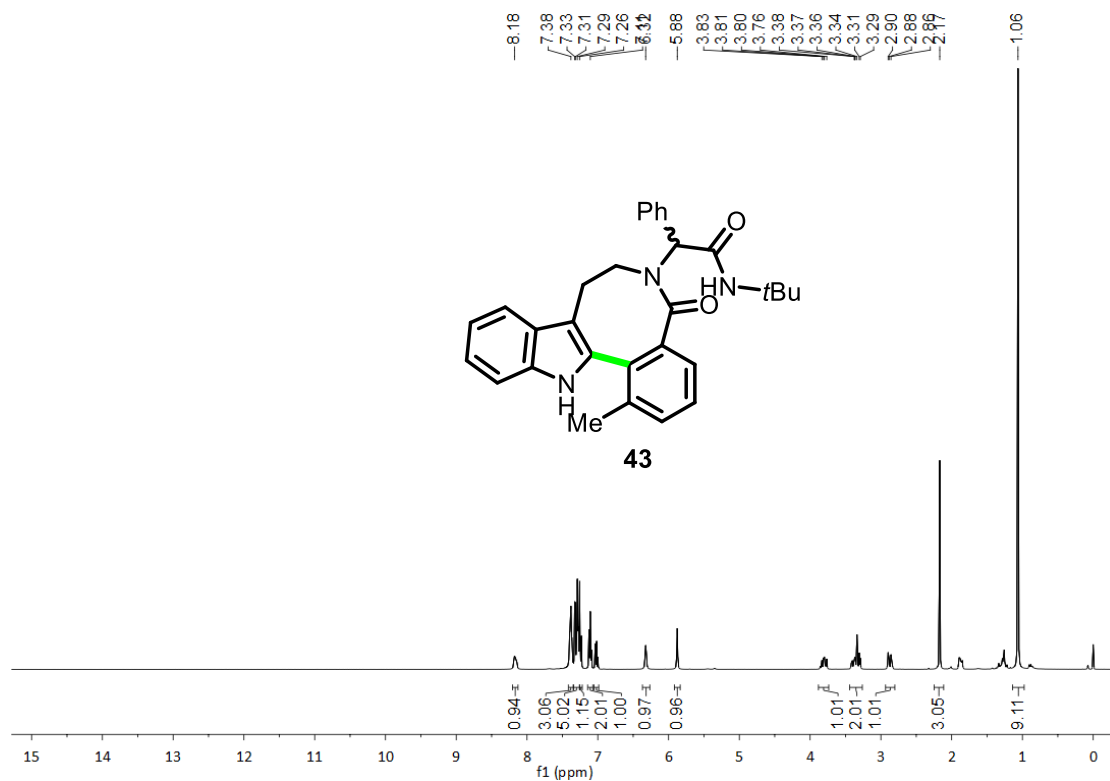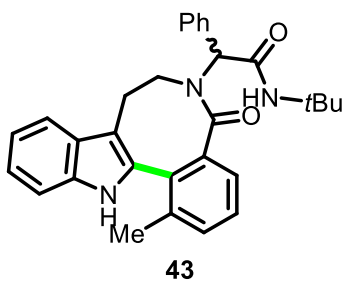

**<sup>13</sup>C NMR (100 MHz, CDCl<sub>3</sub>):**

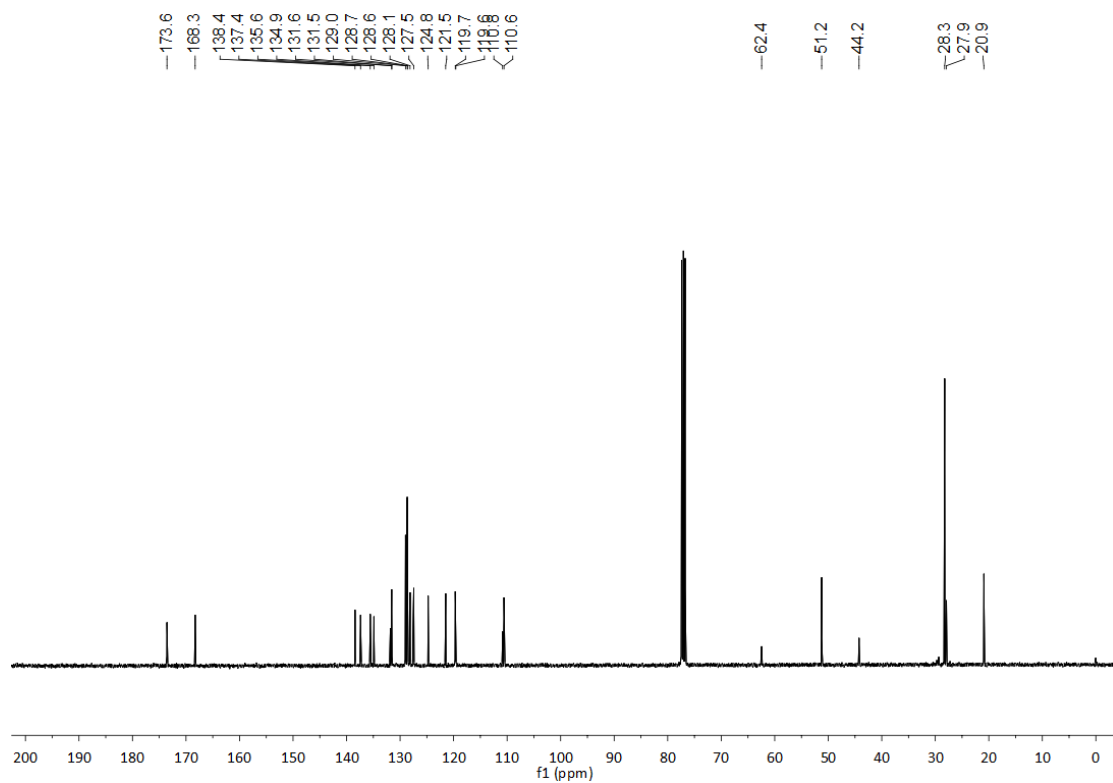

**DEPT**

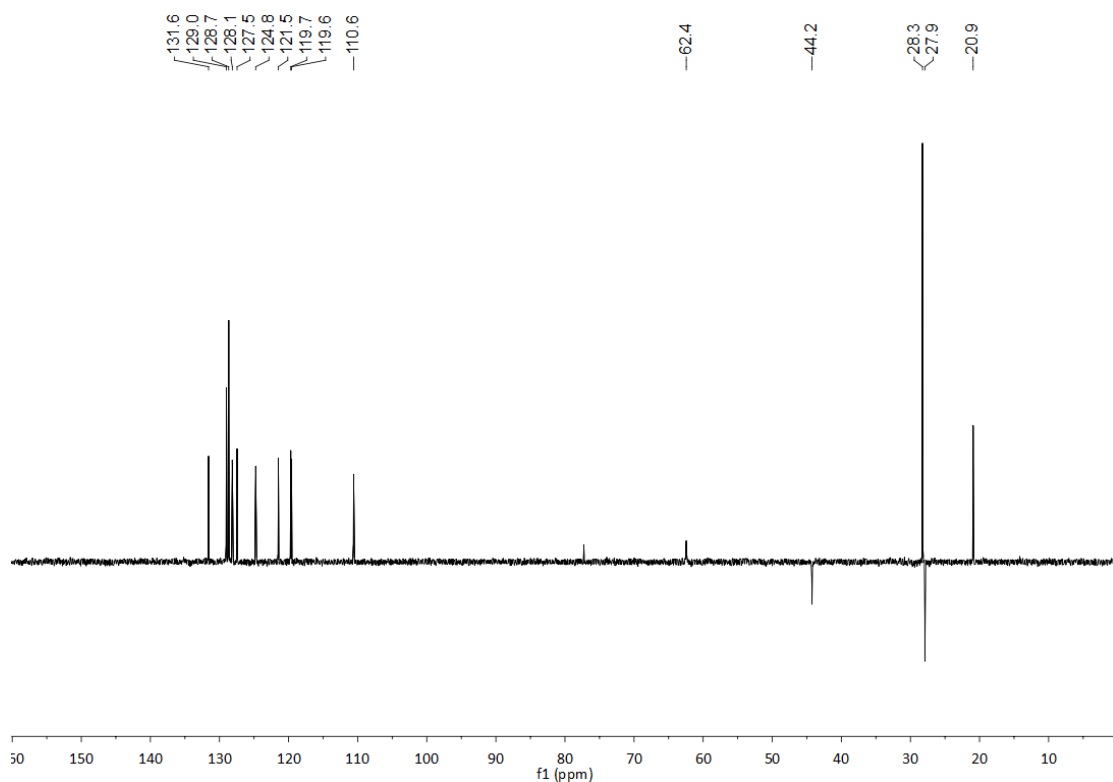

*methyl 4-(2-(2-(1H-indol-3-yl)ethyl)-3-oxoisindolin-1-yl)benzoate (47)*

<sup>1</sup>H NMR (400 MHz, CDCl<sub>3</sub>):

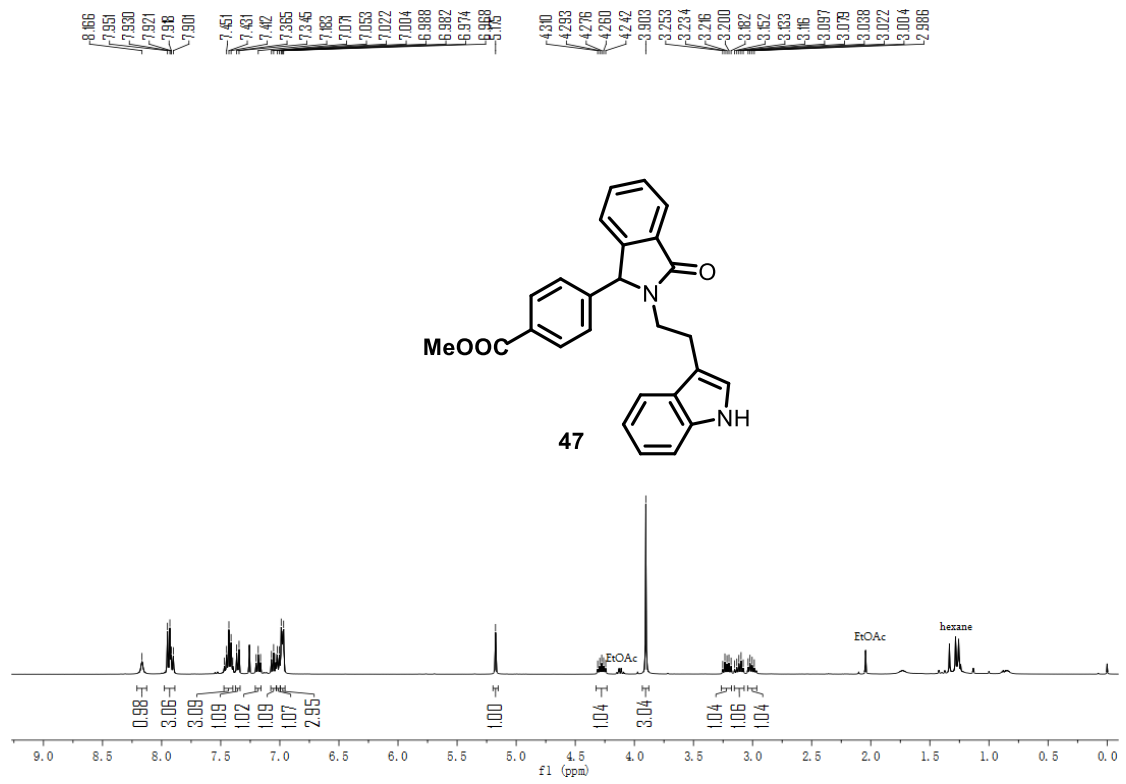

<sup>13</sup>C NMR (100 MHz, CDCl<sub>3</sub>):

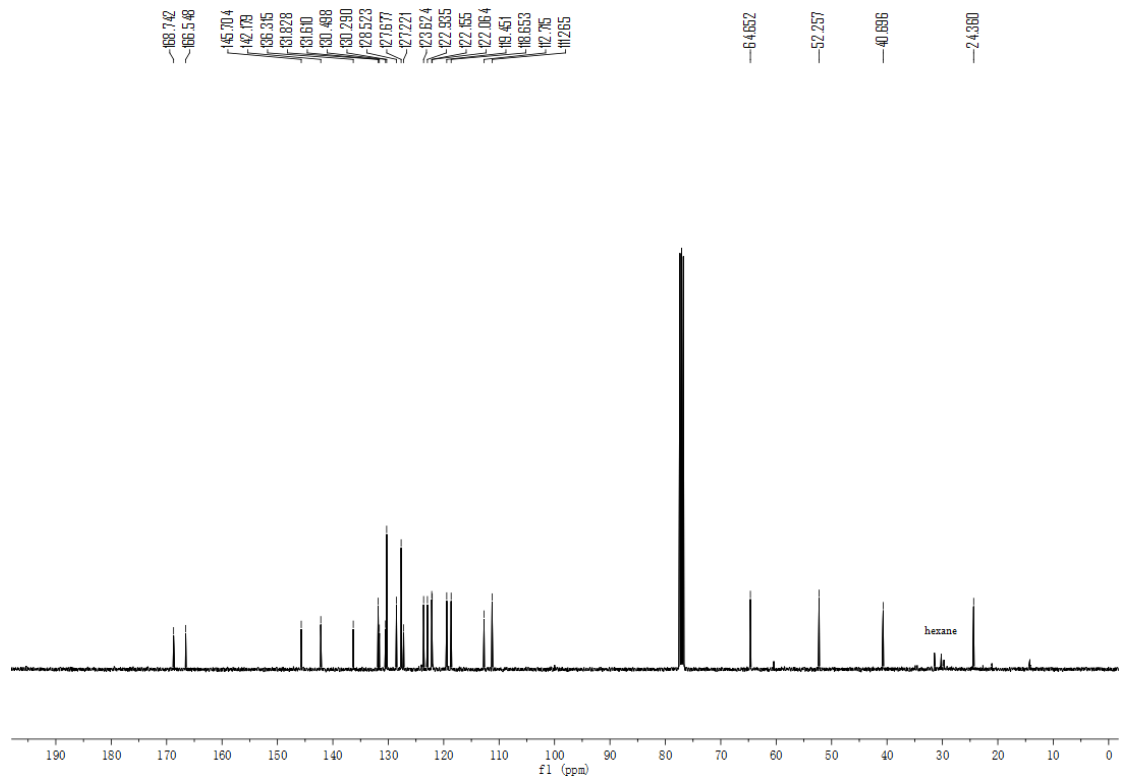

DEPT

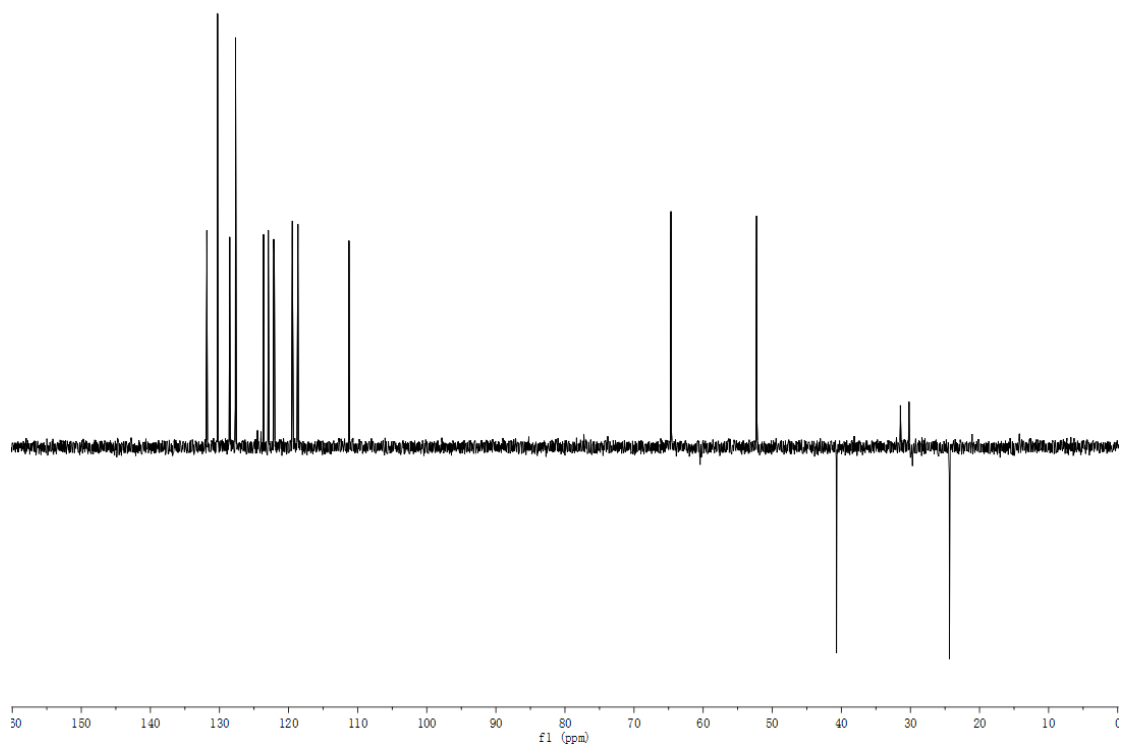

**HMBC**

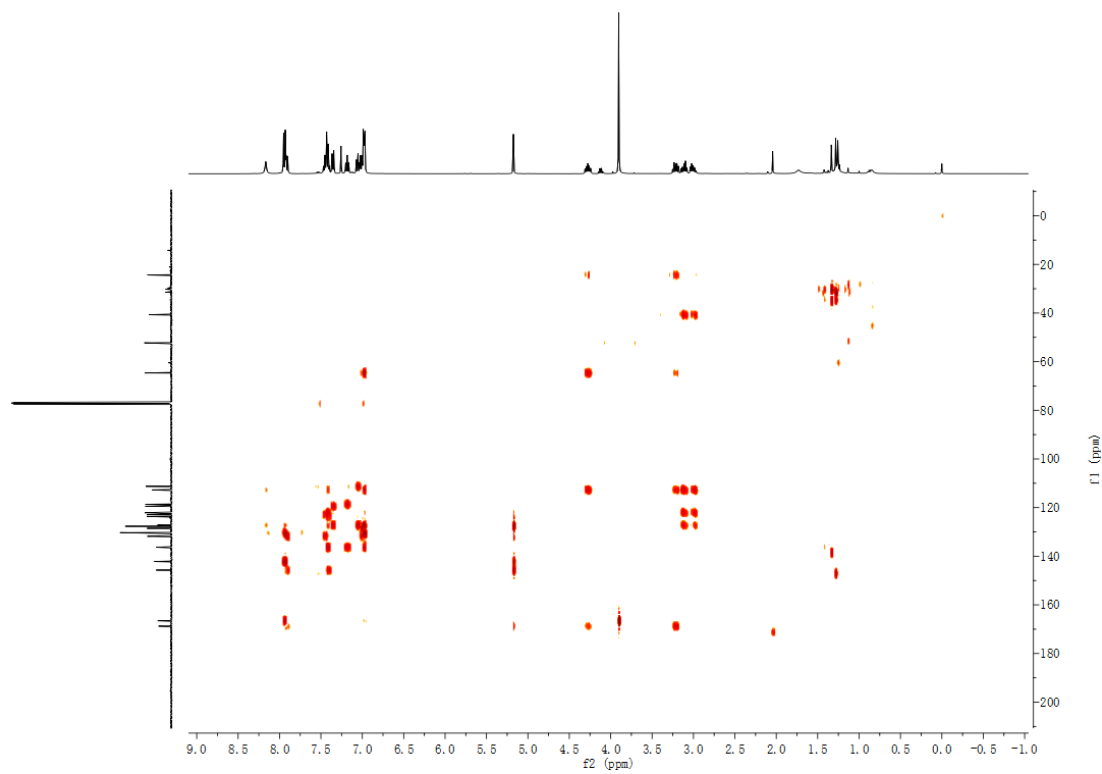

**HSQC**

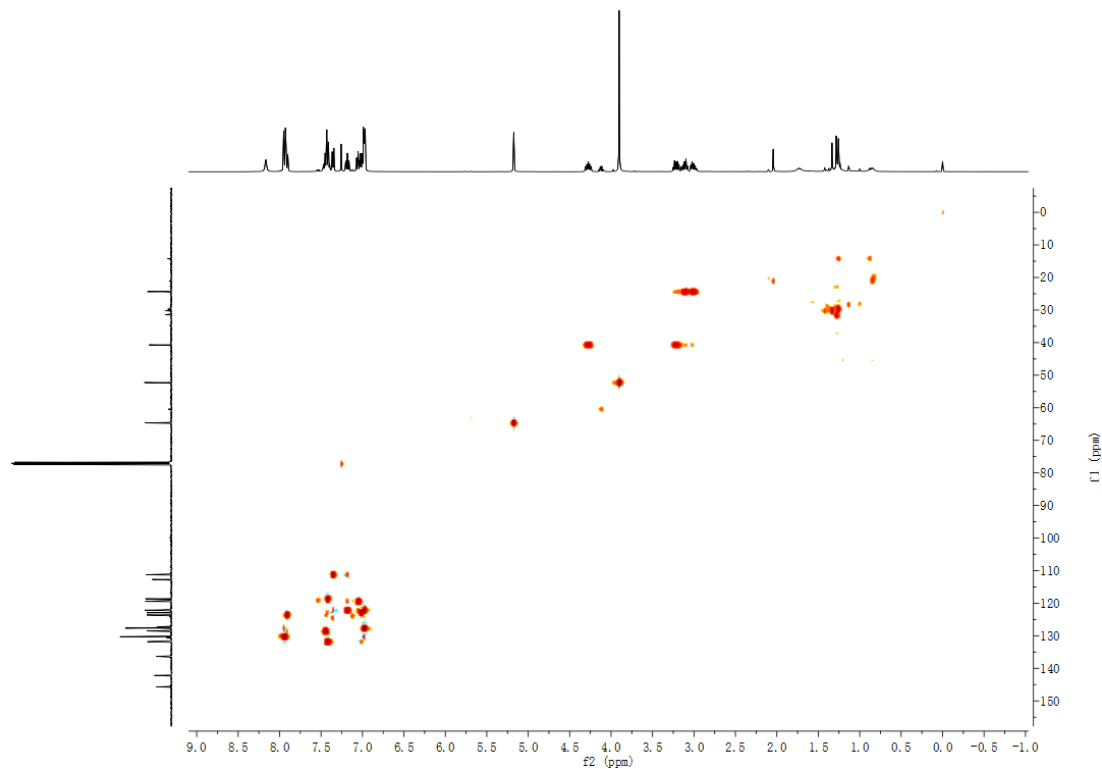

***N*-(*tert*-butyl)-2-(1-oxo-3,4-dihydrospiro[benzo[*c*]azepine-5,3'-indolin]-2(1*H*)-yl)-2-phenylacetamide (49)**

**<sup>1</sup>H NMR (400 MHz, CDCl<sub>3</sub>):**

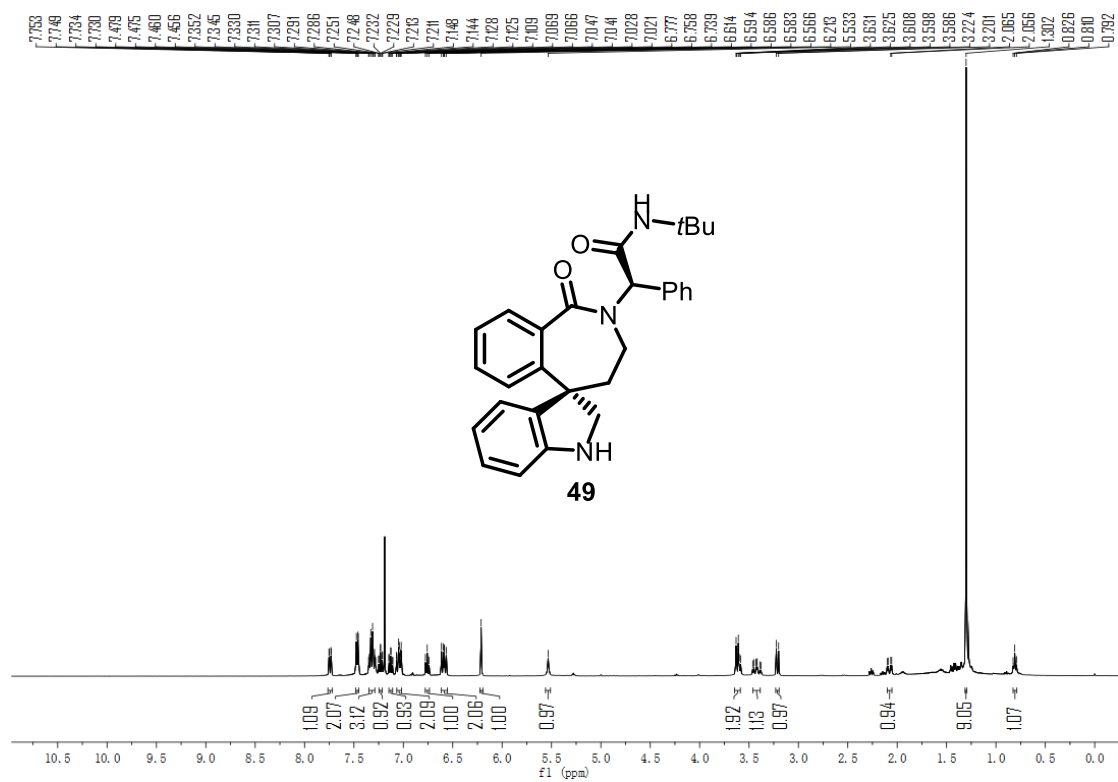

**<sup>13</sup>C NMR (100 MHz, CDCl<sub>3</sub>):**

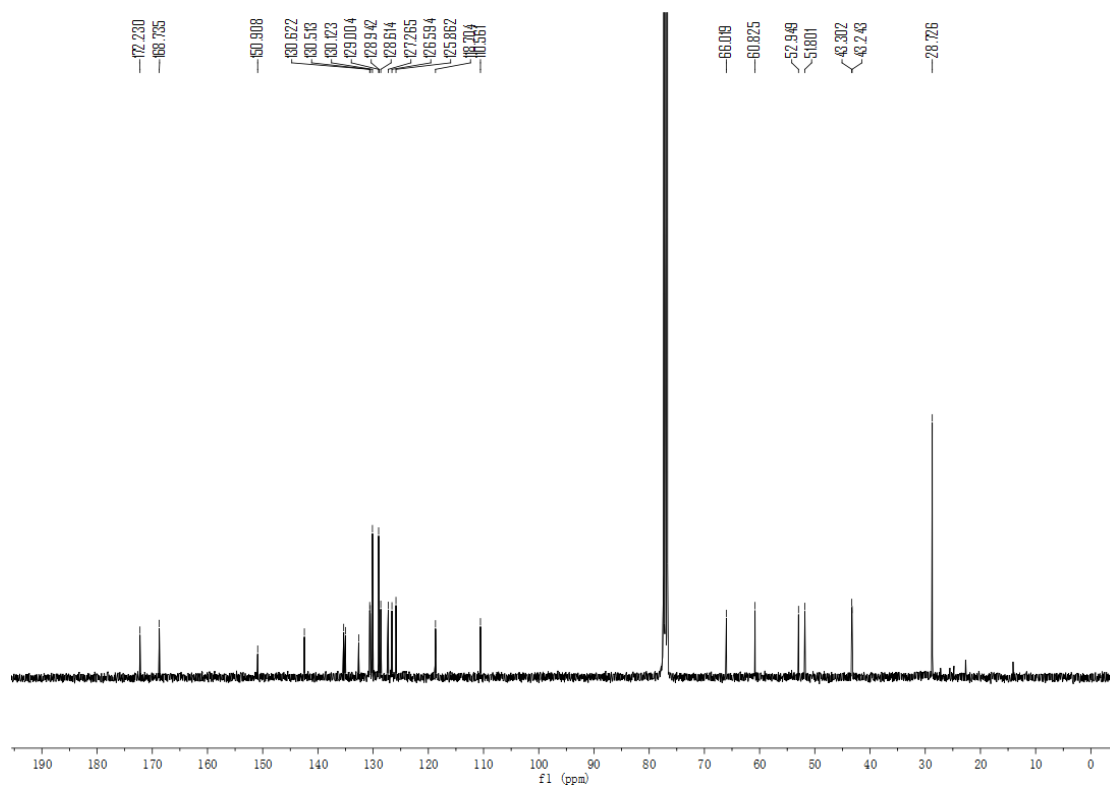

**DEPT**

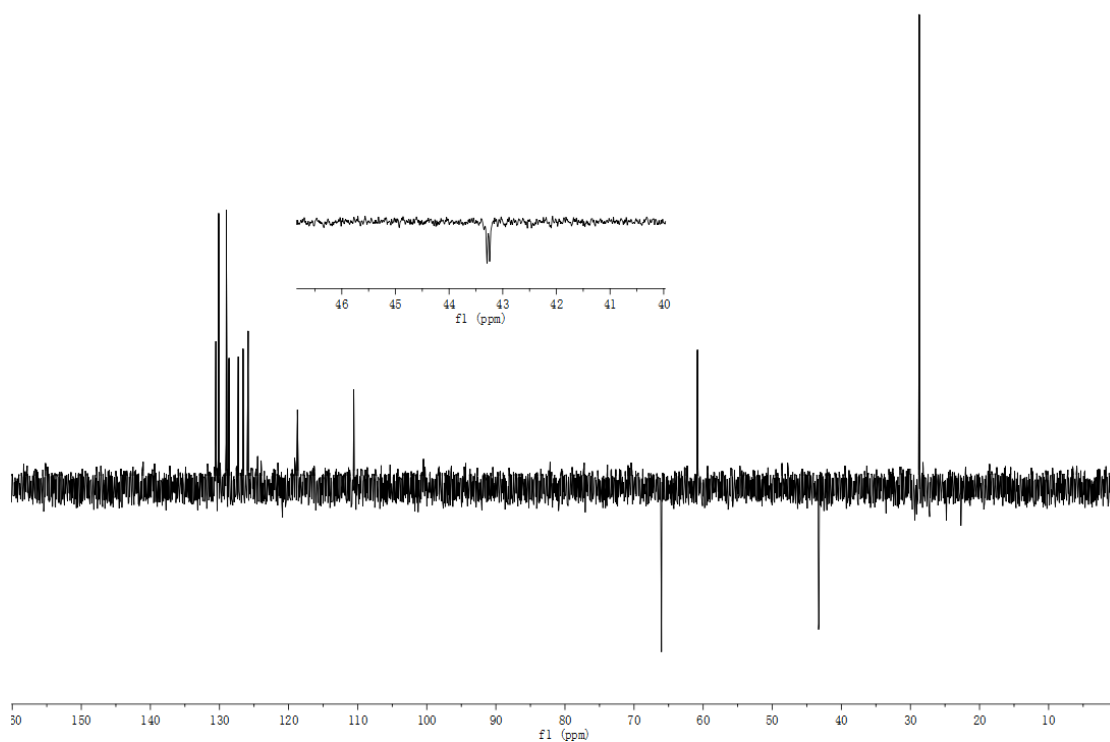

***N*-(*tert*-butyl)-2-(2'-(1-(*tert*-butyl)-1H-tetrazol-5-yl)-1-oxo-3,4-dihydrospiro[benzo[*c*]azepine-5,3'-indolin]-2(1H)-yl)-2-phenylacetamide (50)**

**<sup>1</sup>H NMR (400 MHz, CDCl<sub>3</sub>):**

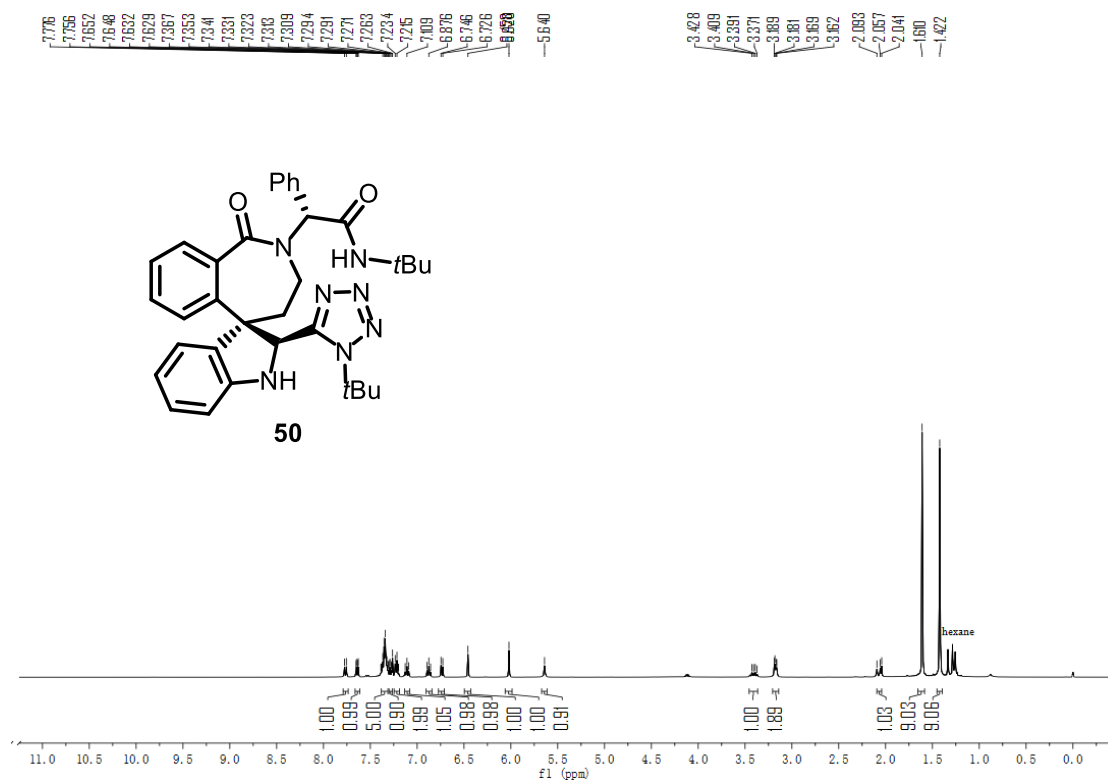

**<sup>13</sup>C NMR (100 MHz, CDCl<sub>3</sub>):**

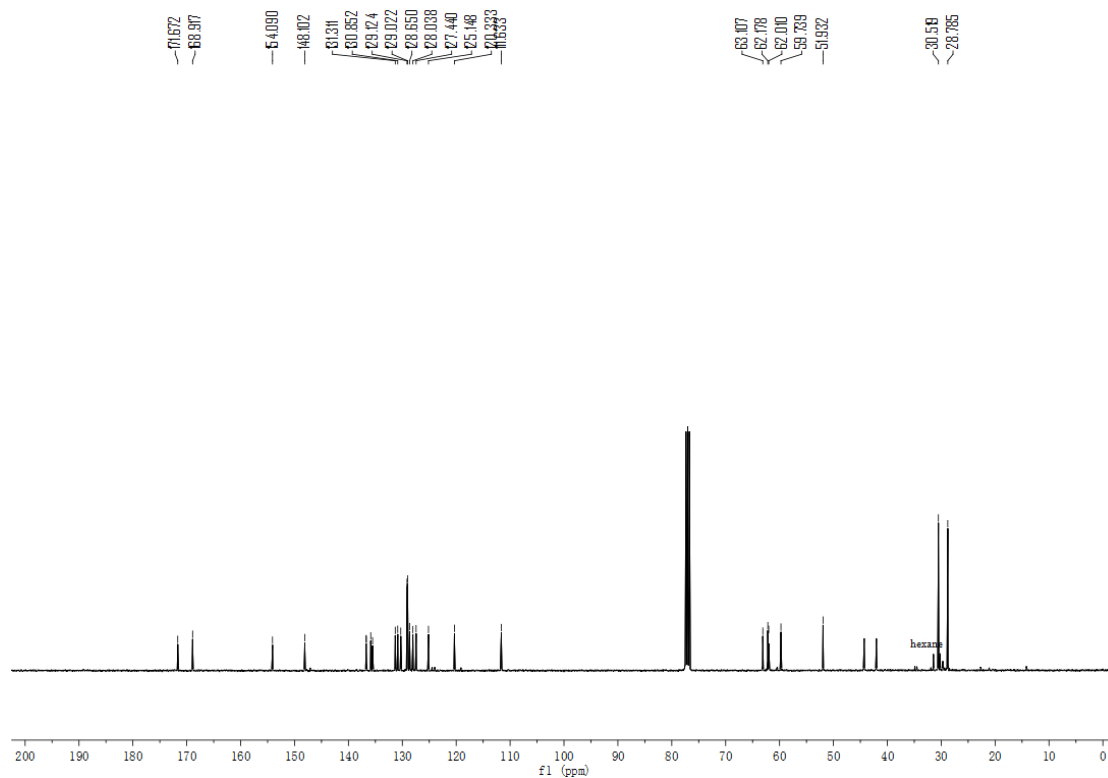

**DEPT**

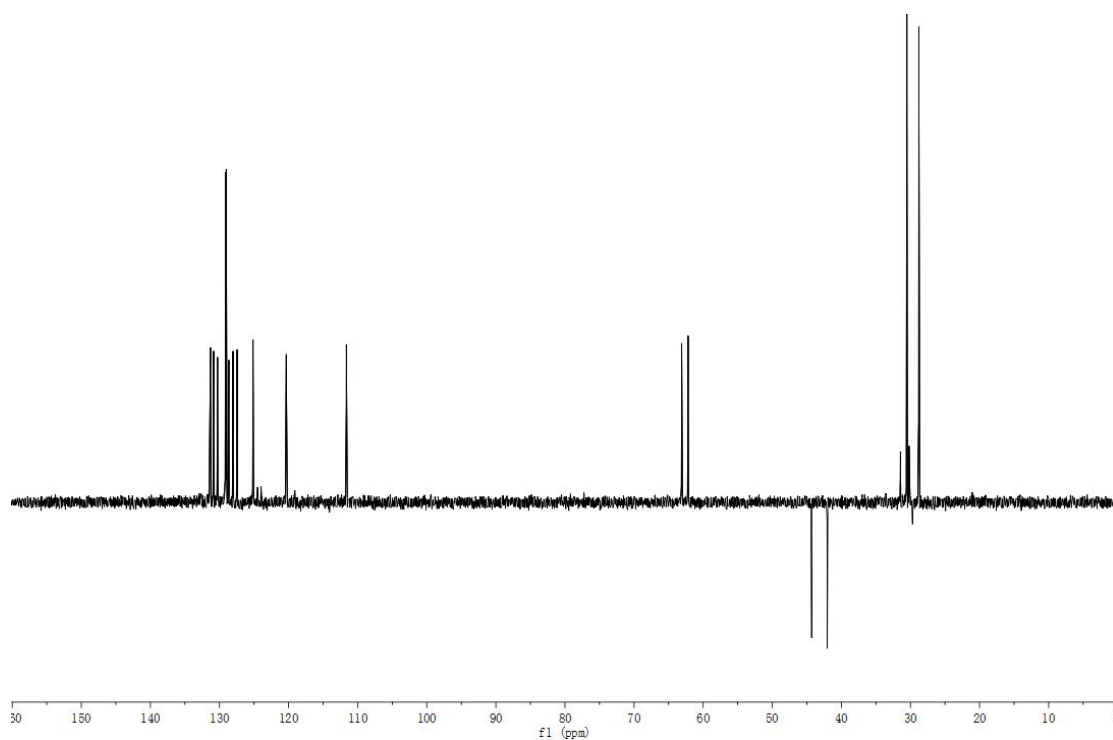

***N*-(*tert*-butyl)-2-(2'-(1-(*tert*-butyl)-1H-tetrazol-5-yl)-1-oxo-3,4-dihydrospiro[benzo[*c*]azepine-5,3'-indolin]-2(1H)-yl)-2-(2-fluorophenyl)acetamide (51)**

**<sup>1</sup>H NMR (400 MHz, CDCl<sub>3</sub>):**

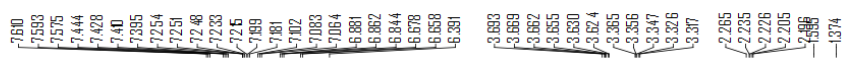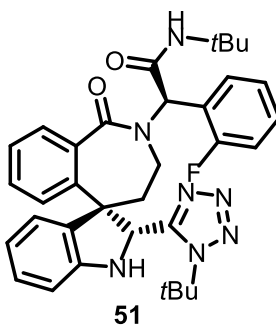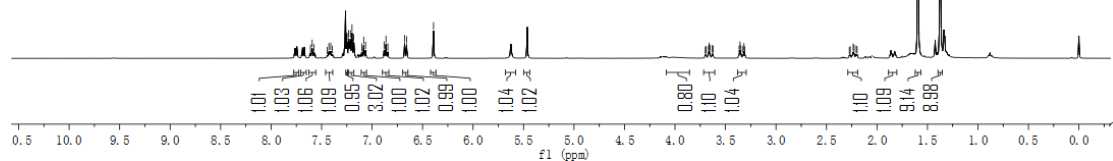

**<sup>13</sup>C NMR (100 MHz, CDCl<sub>3</sub>):**



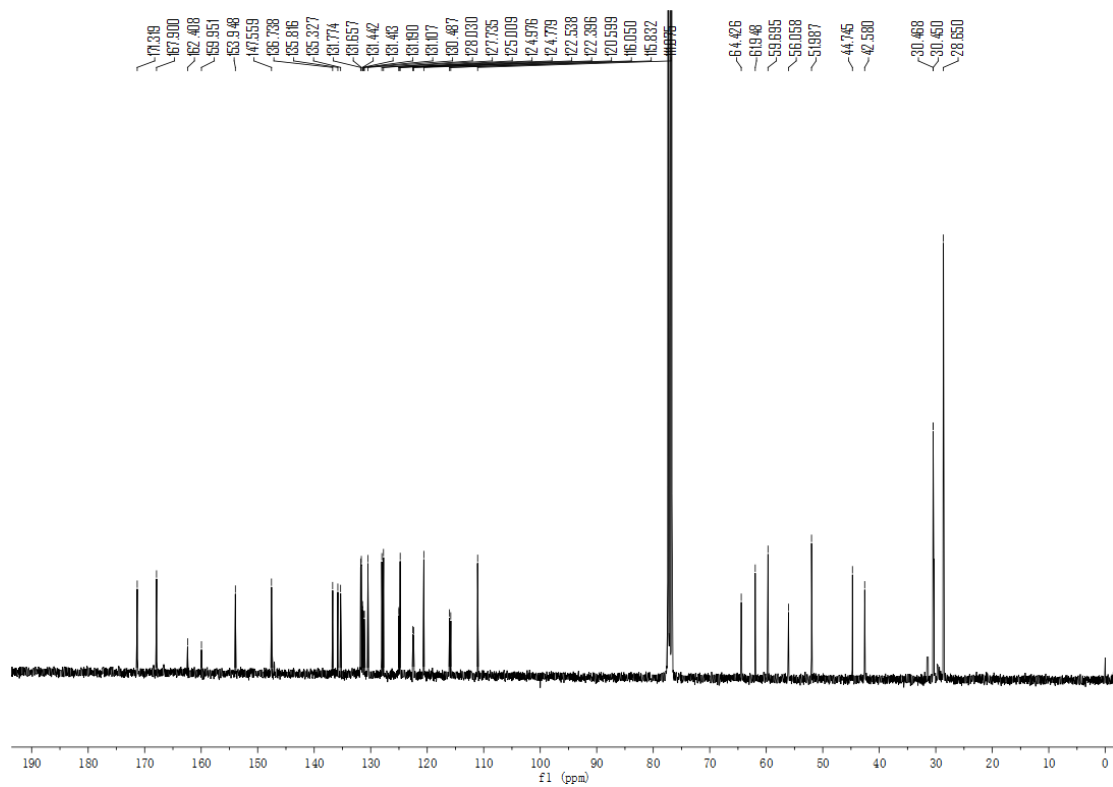

DEPT

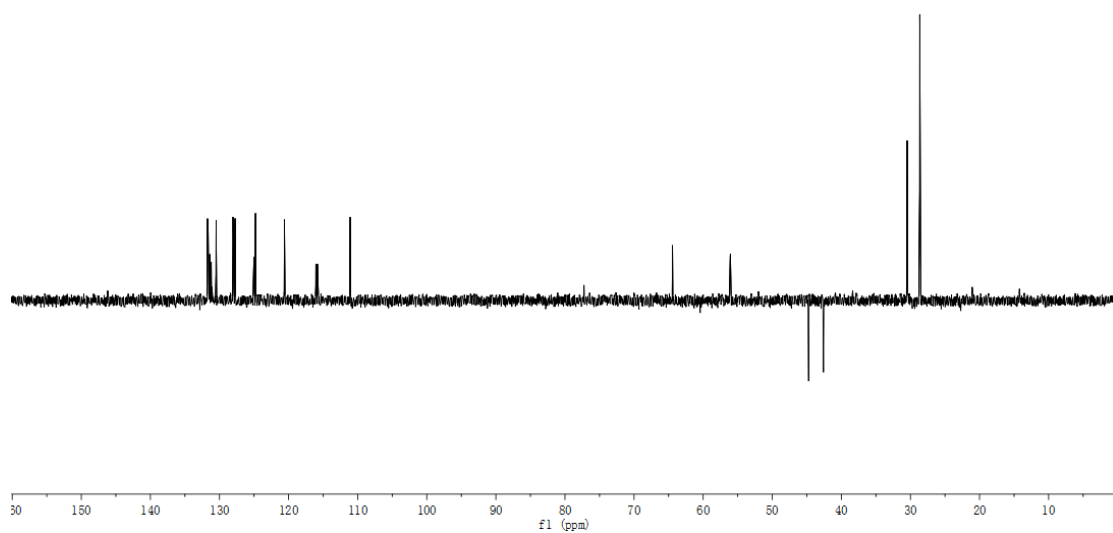

*N*-(*tert*-butyl)-2-(2'-(1-(*tert*-butyl)-1*H*-tetrazol-5-yl)-1-oxo-3,4-dihydrospiro[benzo[*c*]azepine-5,3'-indolin]-2(1*H*)-yl)-2-(3,4,5-trimethoxyphenyl)acetamide (**52**)

<sup>1</sup>H NMR (400 MHz, CDCl<sub>3</sub>):

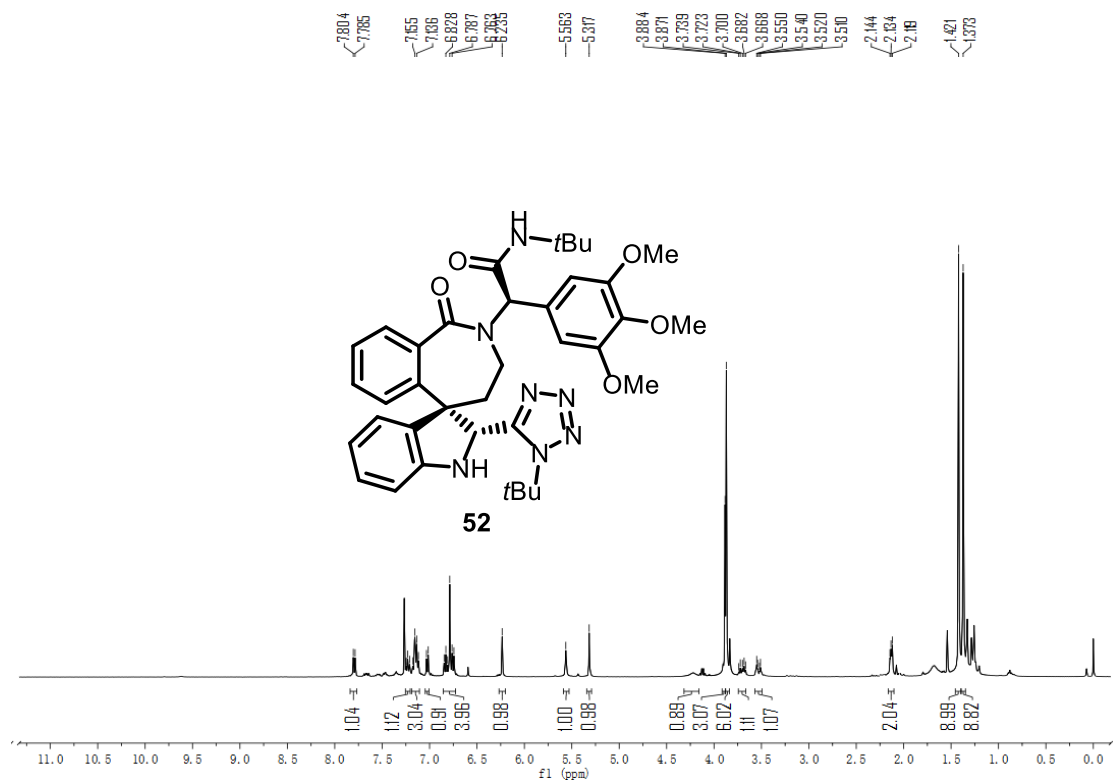

**<sup>13</sup>C NMR (100 MHz, CDCl<sub>3</sub>):**

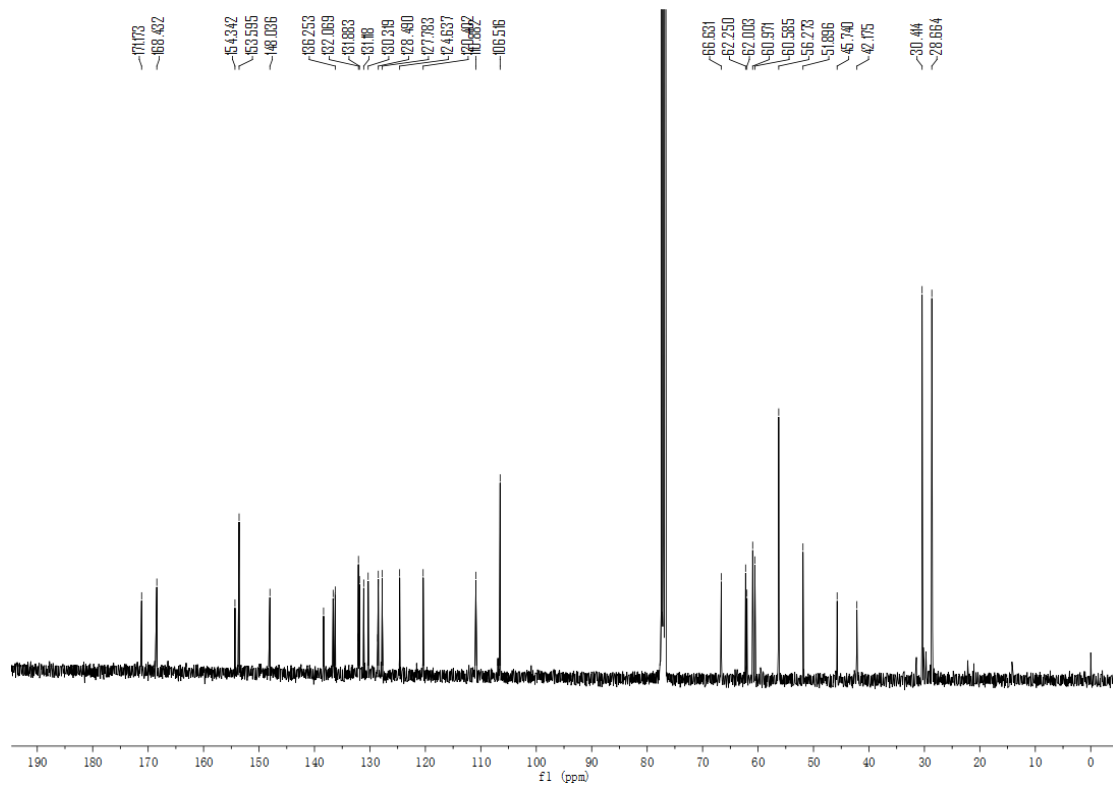

**DEPT**

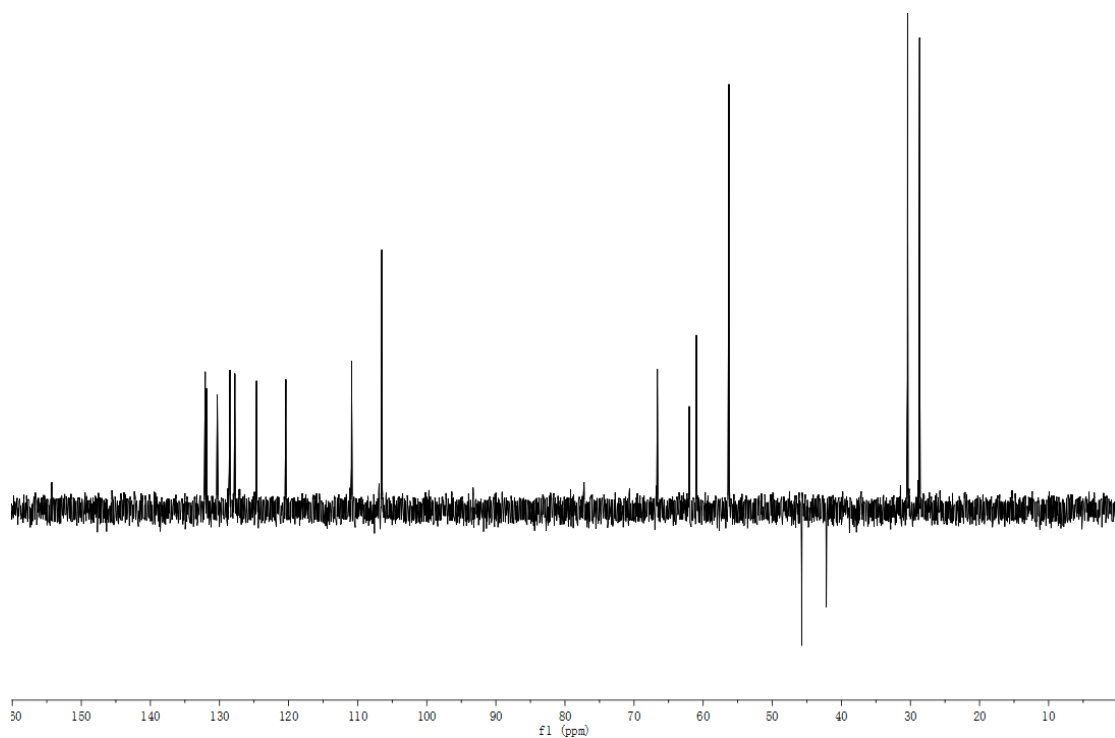

***N*-(*tert*-butyl)-2-(2'-(1-(*tert*-butyl)-1H-tetrazol-5-yl)-7,8-difluoro-1-oxo-3,4-dihydrospiro[benzo[*c*]azepine-5,3'-indolin]-2(1H)-yl)-2-phenylacetamide (53)**

**<sup>1</sup>H NMR (400 MHz, CDCl<sub>3</sub>):**

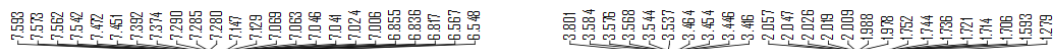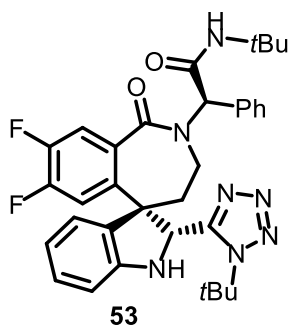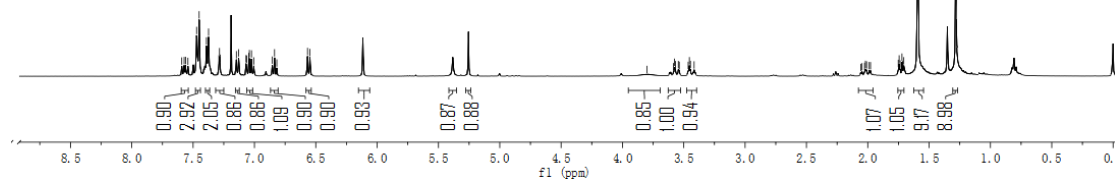

**<sup>13</sup>C NMR (100 MHz, CDCl<sub>3</sub>):**

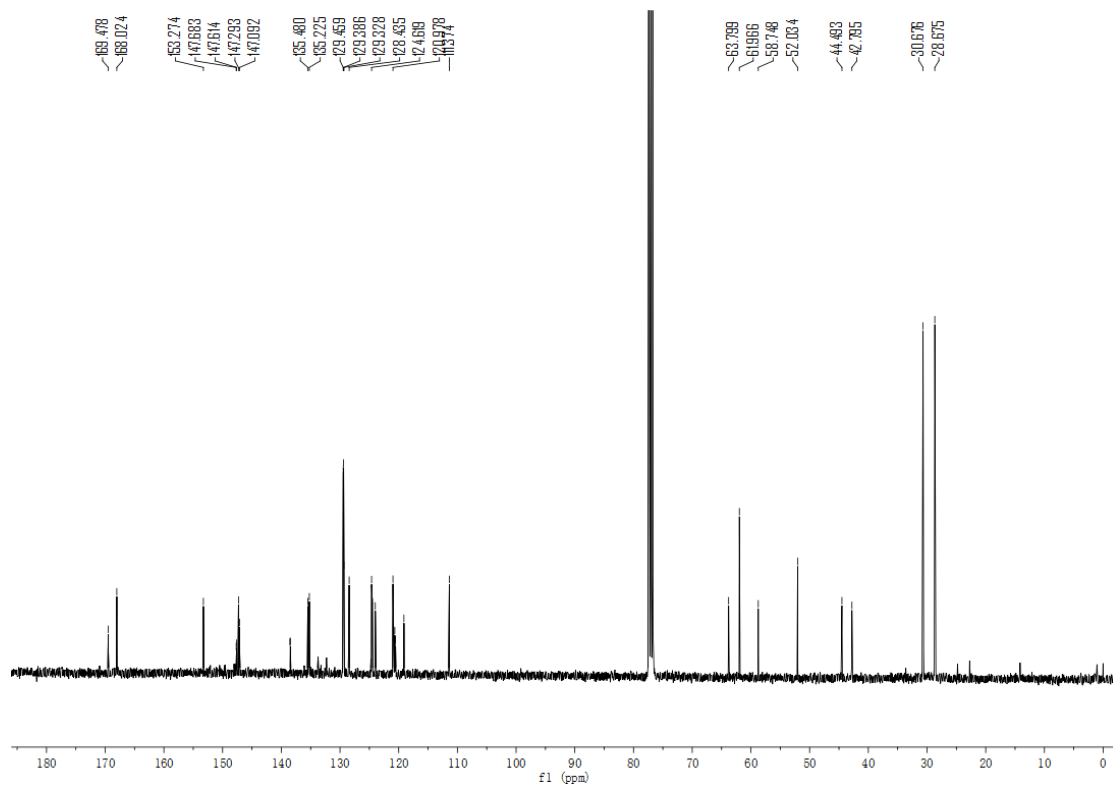

**$F^{19}$  NMR**

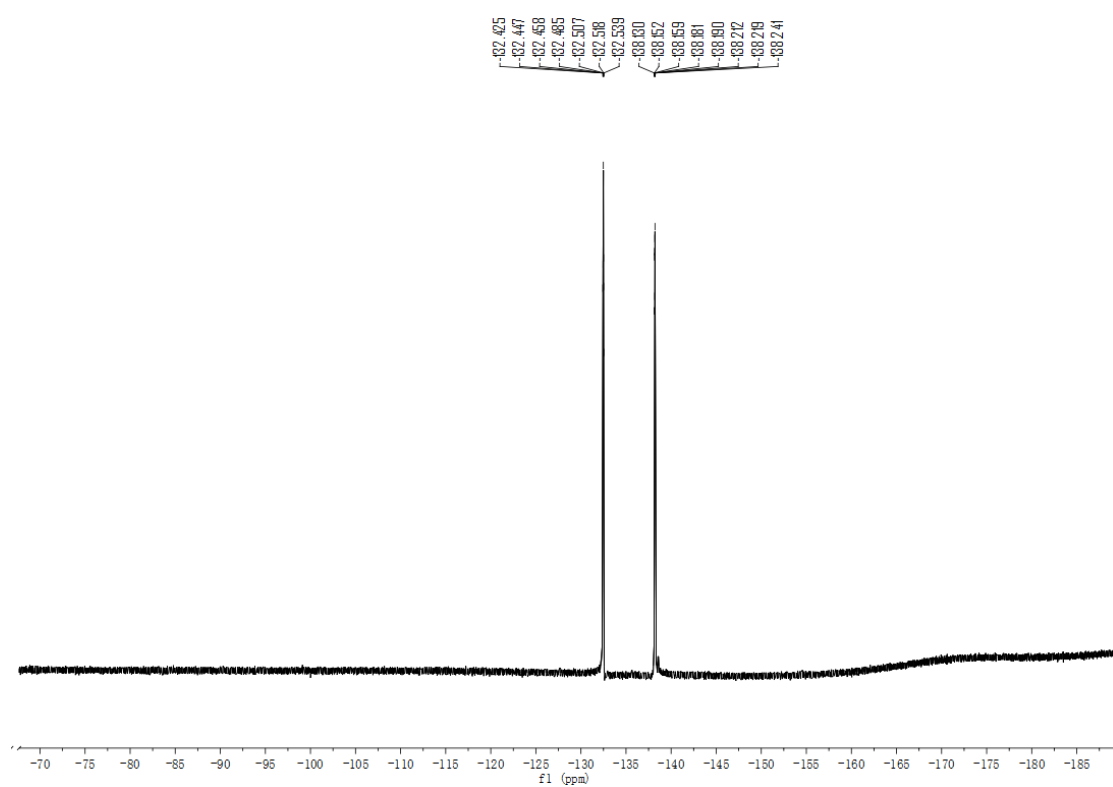

***N*-(*tert*-butyl)-2-(2'-(1-(*tert*-butyl)-1H-tetrazol-5-yl)-7-chloro-1-oxo-3,4-dihydrospiro[benzo[*c*]azepine-5,3'-indolin]-2(1H)-yl)-2-phenylacetamide (54)**

**$^1H$  NMR (400 MHz,  $CDCl_3$ ):**

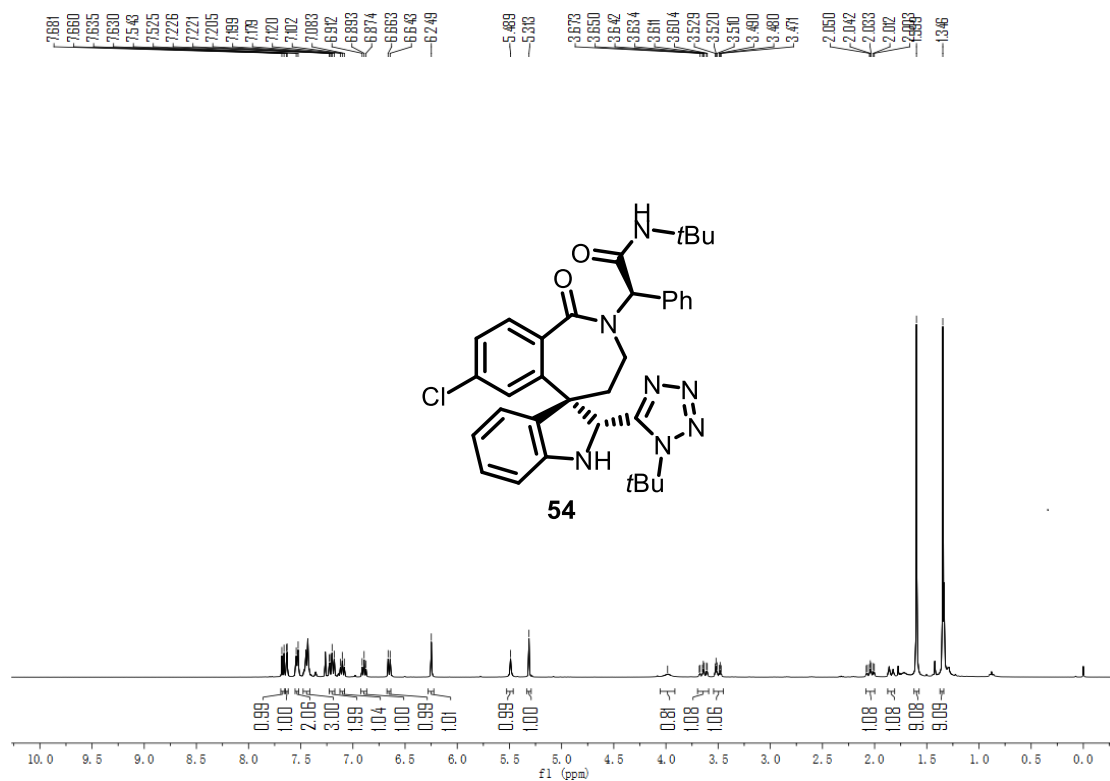

<sup>13</sup>C NMR (100 MHz, CDCl<sub>3</sub>):

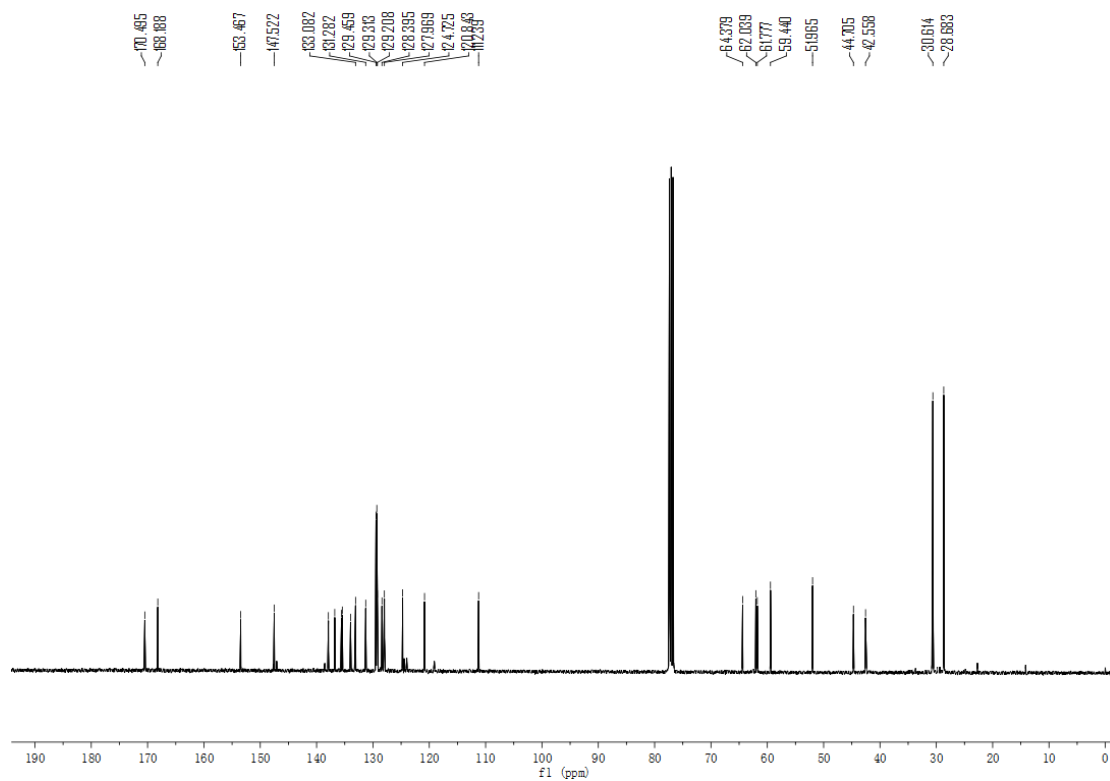

DEPT

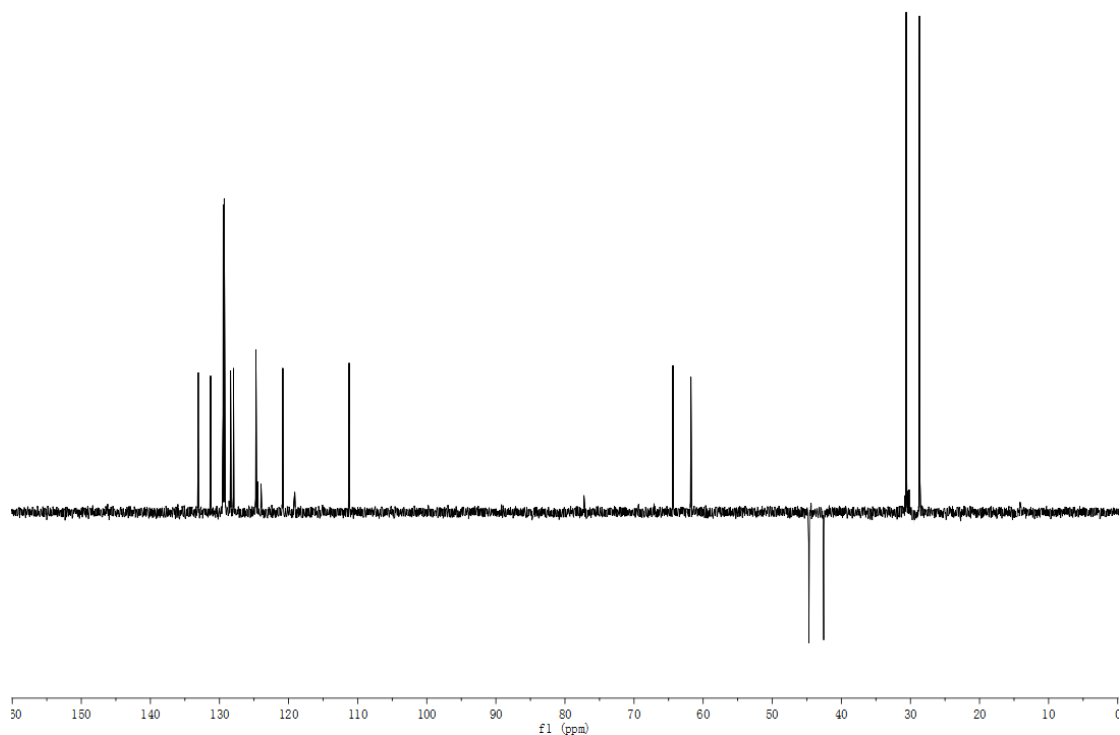

***N*-(*tert*-butyl)-2-(2'-(1-(*tert*-butyl)-1*H*-tetrazol-5-yl)-7'-methyl-1-oxo-3,4-dihydrospiro[benzo[*c*]azepine-5,3'-indolin]-2(1*H*)-yl)-2-phenylacetamide (55)**

**<sup>1</sup>H NMR (400 MHz, CDCl<sub>3</sub>):**

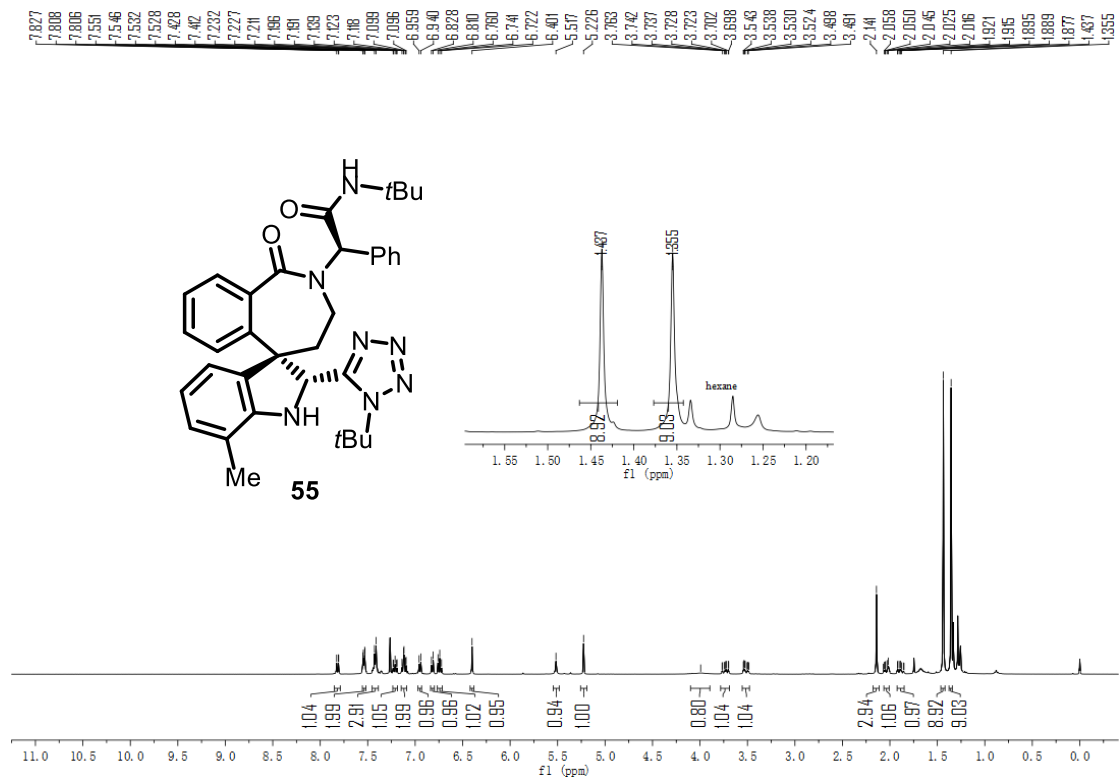

**<sup>13</sup>C NMR (100 MHz, CDCl<sub>3</sub>):**

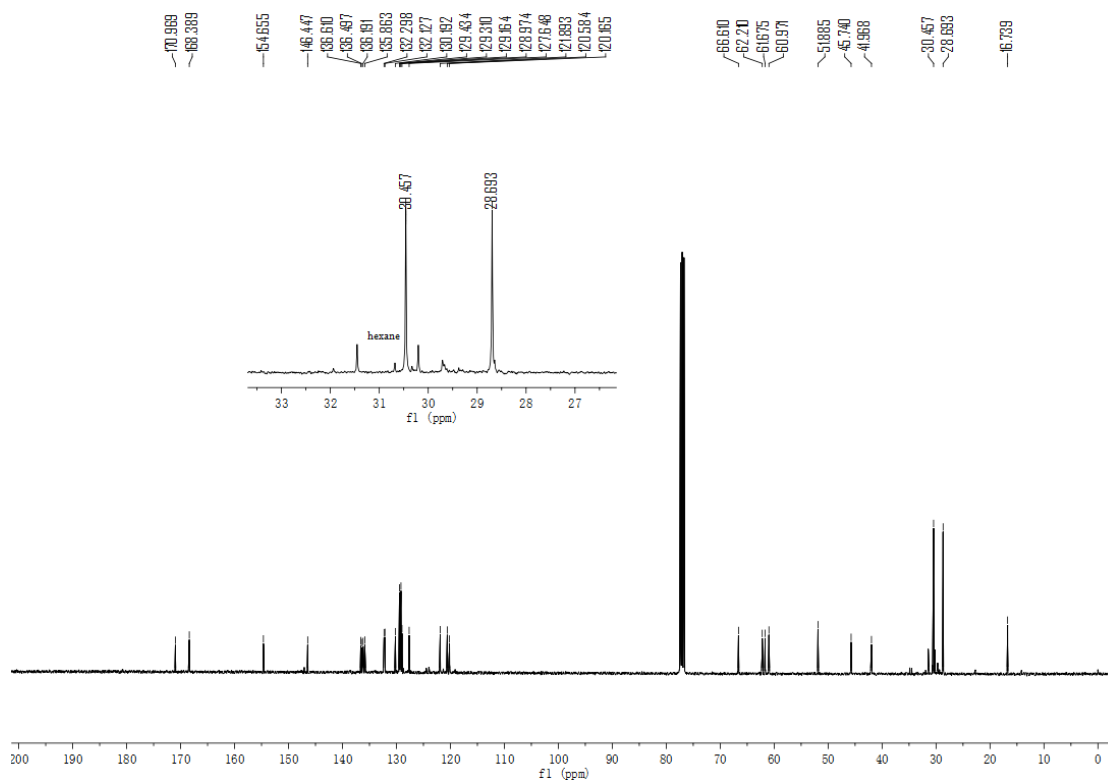

**DEPT**

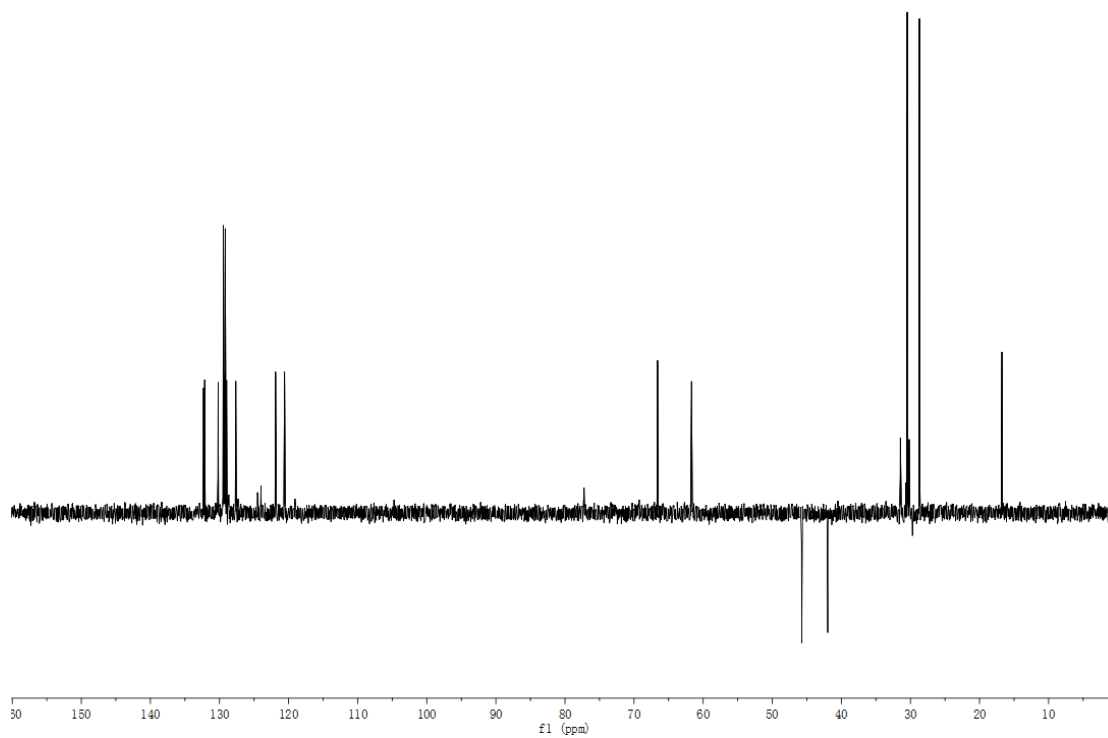

***N*-(*tert*-butyl)-2-(2'-(1-(*tert*-butyl)-1H-tetrazol-5-yl)-6'-fluoro-1-oxo-3,4-dihydrospiro[benzo[*c*]azepine-5,3'-indolin]-2(1H)-yl)-2-phenylacetamide (56)**

**<sup>1</sup>H NMR (400 MHz, CDCl<sub>3</sub>):**

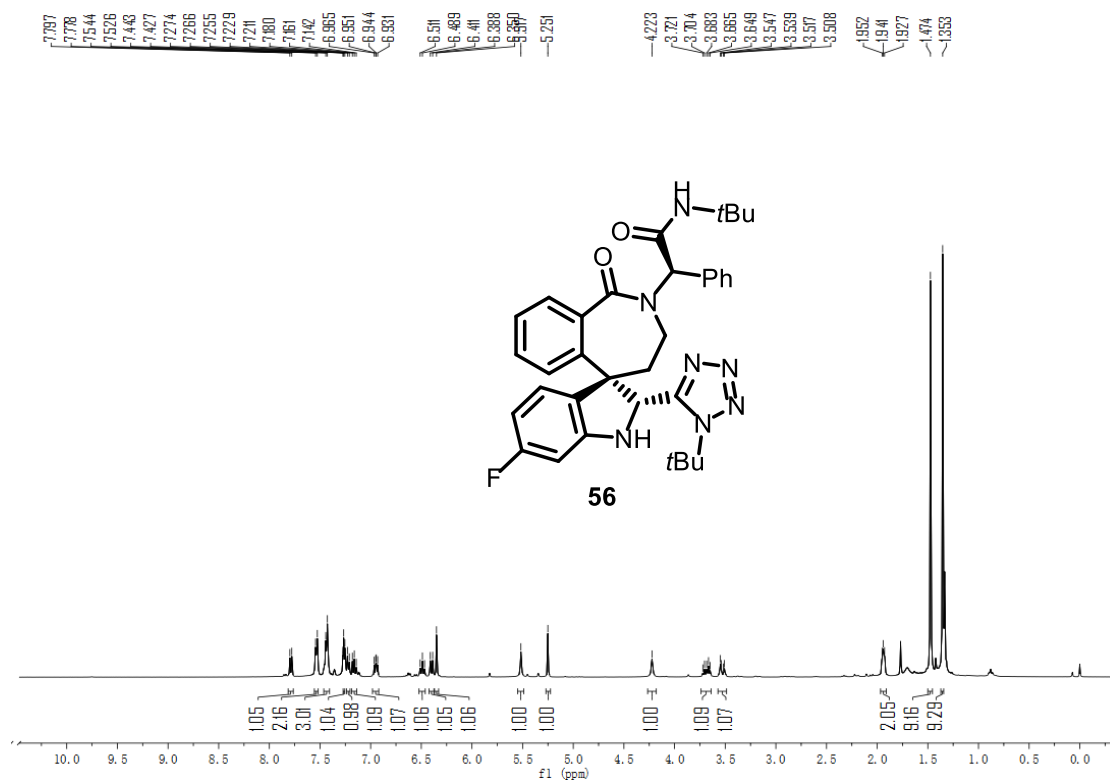

**<sup>13</sup>C NMR (100 MHz, CDCl<sub>3</sub>):**

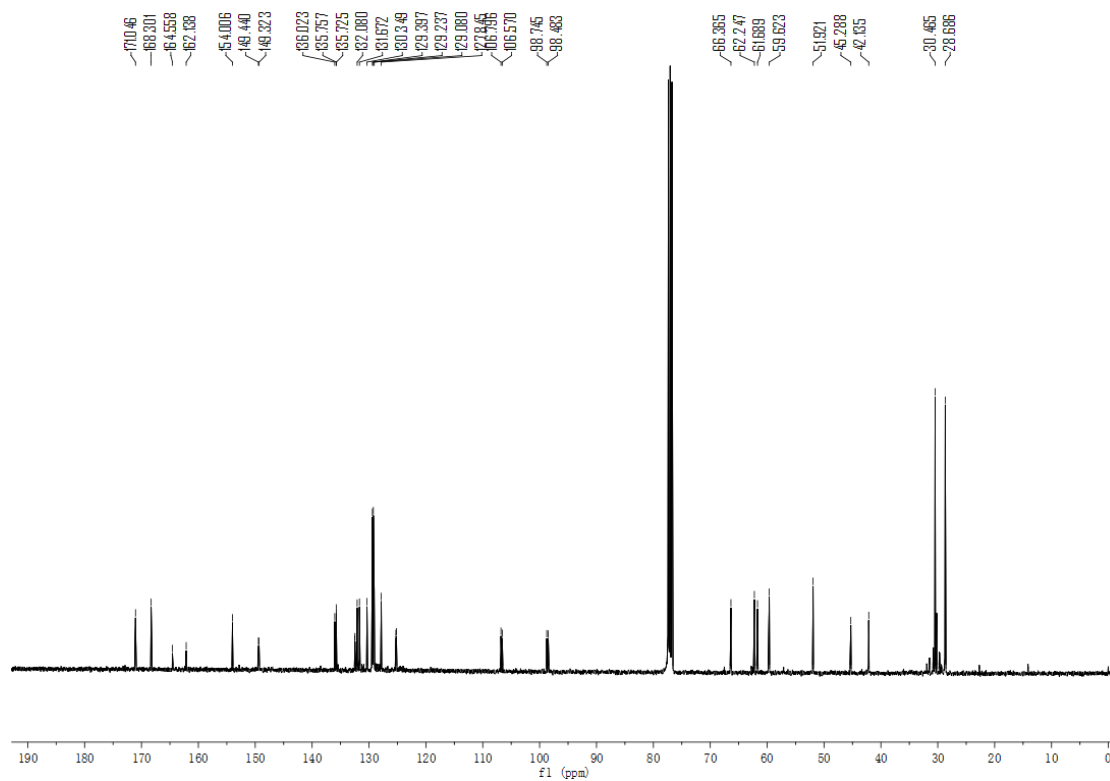

**DEPT**



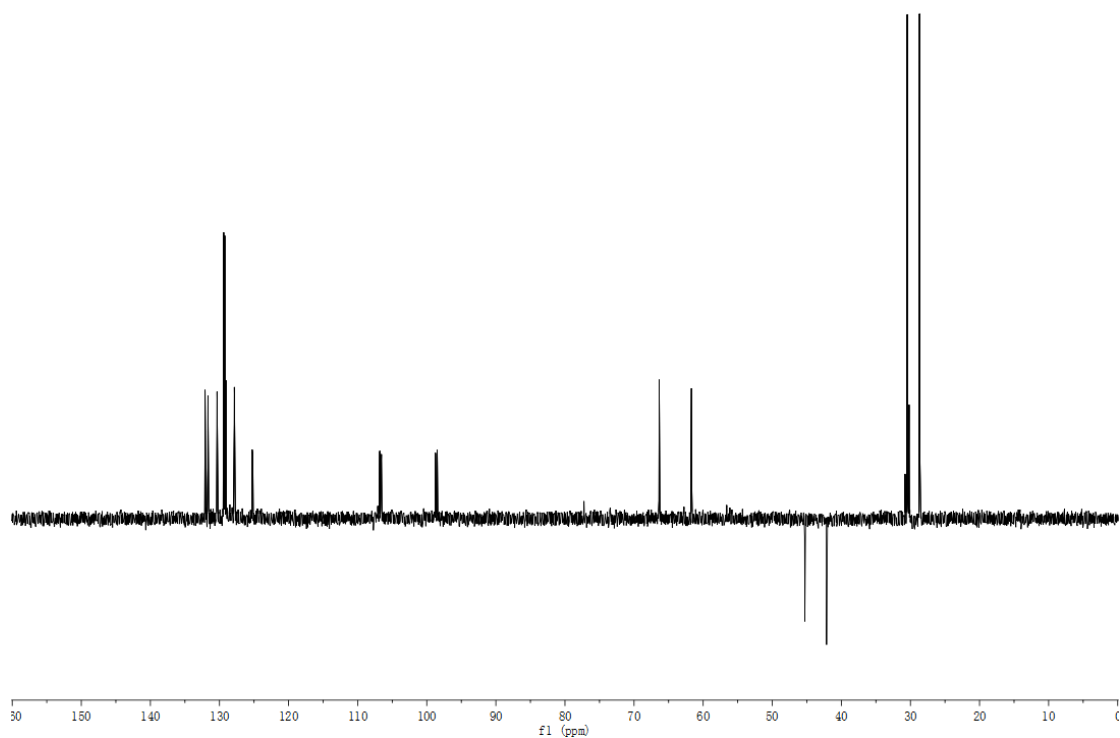

**2-(2'-(1-(tert-butyl)-1H-tetrazol-5-yl)-1-oxo-3,4-dihydrospiro[benzo[c]azepine-5,3'-indolin]-2(1H)-yl)-2-phenyl-N-(2,4,4-trimethylpentan-2-yl)acetamide (57)**

**<sup>1</sup>H NMR (400 MHz, CDCl<sub>3</sub>):**

7.765, 7.762, 7.747, 7.743, 7.738, 7.574, 7.559, 7.448, 7.435, 7.417, 7.403, 7.384, 7.243, 7.227, 7.209, 7.202, 7.197, 7.182, 7.178, 7.163, 7.159, 7.141, 7.131, 7.092, 7.085, 7.085, 7.073, 7.066, 7.066, 6.847, 6.828, 6.809, 6.692, 6.672, 6.328, 5.618, 5.210, 3.703, 3.695, 3.676, 3.669, 3.578, 3.569, 3.569, 3.529, 3.529, 2.058, 2.048, 2.044, 2.028, 2.021, 1.691, 1.692, 1.674, 1.674, 1.465, 1.435, 1.401, 0.927

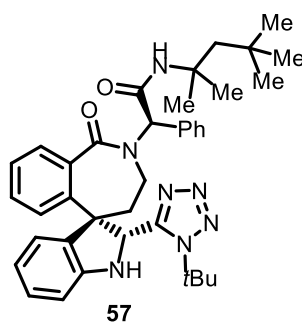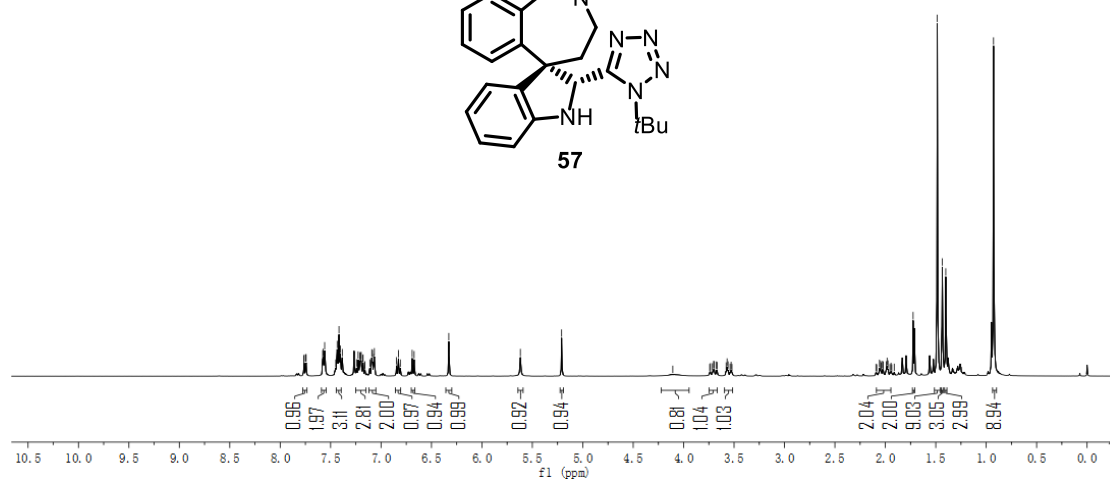

**<sup>13</sup>C NMR (100 MHz, CDCl<sub>3</sub>):**

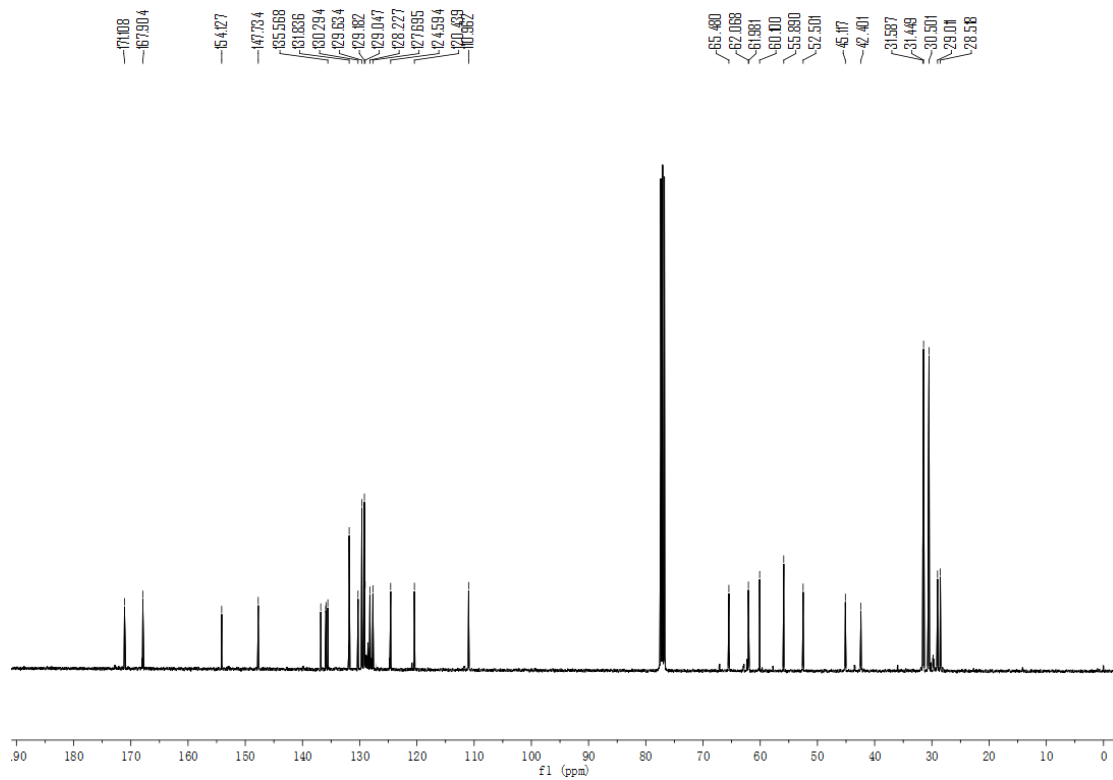

**DEPT**

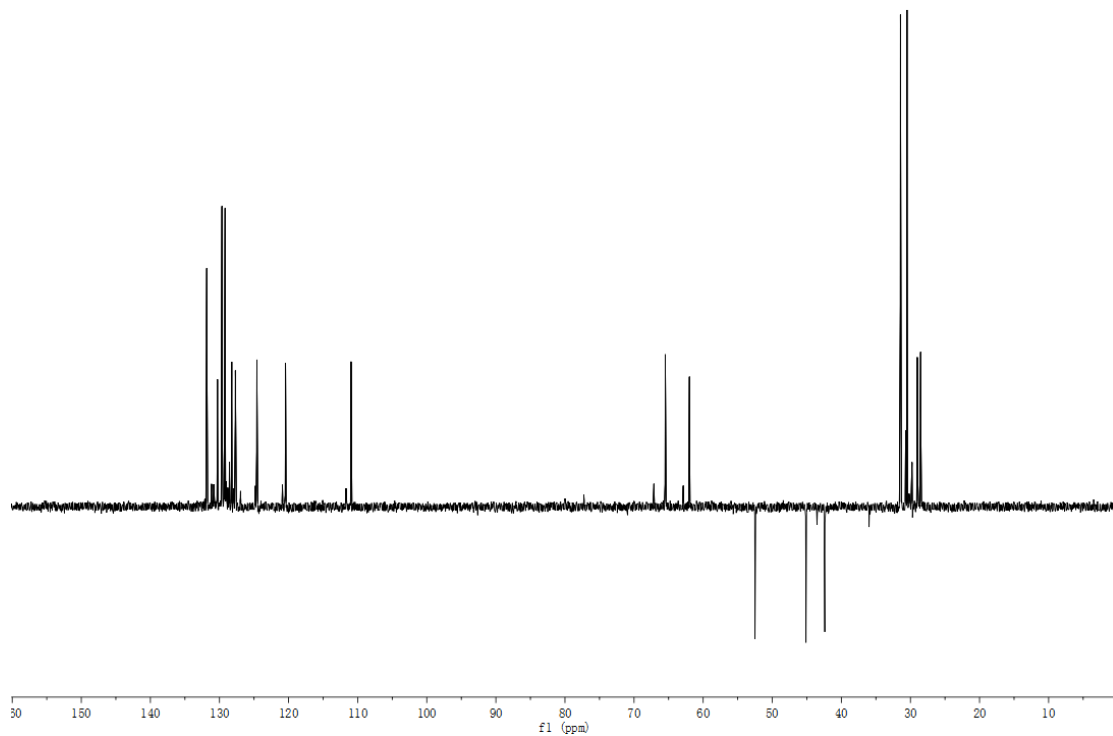

Supplement: d3qo01262j1.pdf [file d3qo01262j1.pdf]
